# Supplementary material for: Diagnostic potential for a serum miRNA neural network for detection of ovarian cancer
Source: eLife. 2017 Oct 31;6:e28932. doi: 10.7554/eLife.28932 (PMC5679755; doi:10.7554/eLife.28932)
Supplement: Supplementary file 6. — Supplementary Dataset (1) TPM data from miRNA sequencing. Supplementary Dataset (2) Batch adjusted, log10-transformed miRNA expression data, filtered for miRNA detection levels in both cohorts. Supplementary Dataset (3) qPCR Validation of neural network. Supplementary Dataset (4) Raw qPCR data. Supplementary Dataset (5) Background Filtered qPCR data. Supplementary Dataset (6) Normalized qPCR data. Supplementary Dataset (7) Normalized expression data from the Keller et al. dataset. Supplementary Dataset (8) Normalized expression data of preoperative and postoperative miRNA expression. [file elife-28932-supp6.xlsx]

## Sheet: Supplemental Dataset 1
Supplemental Dataset 1 - TPM data from miRNA sequencing. Expression values are presented as tags-per-million (tpm). First 179 samples are cases from the PMP/NECC cohort with matched controls, while the remaining 60 (labelled with e preceding the number) are from the ERASMOS cohort.
	Sample
miRNA	1	2	3	4	5	6	7	8	9	10	11	12	13	14	15	16	17	18	19	20	21	22	23	24	25	26	27	28	29	30	31	32	33	34	35	36	37	38	39	40	41	42	43	44	45	46	47	48	49
hsa-let-7a-2-3p	0	0	0	0	0	0	0	0	0	0	0	0	0	0	0	0	0	0	0	0	0	0	0	0	0	0	0	0	0	0	0	0	0	0	0	0	0	0	0	0	0	0	0	0	0	0	0	0	0
hsa-let-7a-3p	34	71	58	69	16	15	47	21	96	36	39	32	48	109	40	38	30	42	52	91	89	19	47	40	81	34	47	35	54	30	19	30	65	50	55	35	27	51	7	35	68	48	31	19	15	37	93	22	6
hsa-let-7a-5p	17774	11173	11066	6275	9655	14000	8757	10743	16453	12745	11568	18149	14098	1525	18057	14768	4360	8515	20741	23144	9882	7775	4162	6845	12651	7734	5890	17817	7560	11703	3108	12563	8612	4956	10984	3397	5445	26364	5826	9146	13381	14321	6241	2244	6071	6315	11301	2669	9987
hsa-let-7b-3p	5	17	10	13	17	16	17	21	3	13	17	11	28	17	15	16	27	30	23	32	14	12	14	21	19	27	17	25	22	16	13	15	9	22	21	7	20	17	9	23	23	5	12	15	9	55	24	11	14
hsa-let-7b-5p	8996	5518	6510	10655	4256	3759	11935	9984	3250	5166	5561	3652	6073	22502	6220	9203	36007	2050	6048	21860	6238	6114	10978	7946	8112	9775	10270	33975	33700	5757	8035	4026	6839	42883	7732	6122	15570	46657	3878	20929	10965	10036	7696	11904	3988	18636	20657	8660	5715
hsa-let-7c-3p	1	0	0	0	0	0	0	0	0	0	0	0	0	0	0	0	0	0	0	0	0	0	0	0	0	1	0	0	0	0	0	0	0	0	0	0	0	0	0	0	0	0	0	0	0	0	0	0	0
hsa-let-7c-5p	758	627	465	444	352	425	441	668	479	485	474	515	479	231	660	682	405	276	830	1310	626	322	351	430	594	457	391	1157	695	381	159	507	444	505	372	192	459	1874	242	537	834	577	405	180	321	545	697	1259	318
hsa-let-7d-3p	197	561	414	216	395	776	533	1504	128	586	558	514	651	1641	520	819	1825	736	638	949	570	433	311	491	451	583	358	726	624	484	326	577	254	697	655	231	531	324	340	550	670	155	377	487	243	980	557	285	914
hsa-let-7d-5p	1280	816	1147	482	837	1118	1038	800	656	1034	1030	1219	1160	214	1163	1065	711	573	1135	1622	606	909	356	629	965	352	367	717	486	871	342	672	641	331	969	288	274	712	286	584	859	1008	311	143	361	205	856	189	620
hsa-let-7e-3p	0	0	0	0	0	0	0	4	0	0	0	1	0	4	0	0	0	0	2	0	0	0	0	0	1	1	0	1	0	0	0	0	0	2	0	0	1	0	0	0	1	0	0	0	1	0	0	0	0
hsa-let-7e-5p	88	31	45	70	74	175	125	414	24	102	172	96	110	32	92	113	82	50	95	198	110	93	70	104	486	105	75	86	66	115	26	135	155	33	66	110	95	63	64	209	254	37	162	50	98	175	34	82	118
hsa-let-7f-1-3p	6	6	4	6	3	5	6	5	7	6	8	6	10	2	8	5	4	4	3	7	4	1	10	12	4	1	1	3	5	3	1	1	5	8	2	3	5	6	1	4	3	5	4	4	2	4	8	3	0
hsa-let-7f-2-3p	1	1	1	1	0	1	1	0	1	0	0	0	1	0	1	0	0	0	1	0	2	0	0	1	1	0	0	0	0	0	0	0	0	1	1	0	0	1	0	0	0	1	0	0	1	0	1	0	0
hsa-let-7f-5p	13726	11779	11431	5735	8140	12670	6907	6263	26691	11423	10360	20440	11910	1604	18163	12293	1634	8100	18723	16248	8113	4758	2750	4574	11159	5911	5100	11067	4984	7708	1816	10708	6382	2636	9699	3071	5450	21639	3374	5808	10753	9738	5419	1184	6081	4875	8232	2880	4463
hsa-let-7g-3p	4	0	1	0	0	0	0	0	1	0	0	0	0	0	0	0	1	0	0	0	3	0	0	0	0	0	0	0	0	0	0	0	0	0	0	0	0	0	0	0	0	1	0	0	0	0	0	0	0
hsa-let-7g-5p	10568	4755	4473	1851	2078	3399	1990	1565	20847	3054	2794	5666	3957	839	5410	2576	721	3409	5726	4048	1979	1162	1172	1317	2998	2113	1861	4412	2796	2119	744	3355	1887	1971	3768	1218	1941	7206	819	2003	2593	3576	1395	578	1219	1635	3454	915	1018
hsa-let-7i-3p	17	9	4	5	1	0	3	2	11	5	3	1	5	4	7	3	4	5	7	11	9	1	3	7	5	6	2	5	7	3	2	5	4	8	7	4	3	4	1	2	4	7	1	1	0	2	14	2	0
hsa-let-7i-5p	18637	16150	14493	10935	9760	11548	11596	8049	31143	11080	12536	17819	9741	4842	16456	13036	3148	7539	12082	20183	8150	5496	6179	9473	11112	7358	8683	13164	11834	6346	4746	9186	7746	7706	12922	4164	6651	24951	2722	7395	10710	8807	5871	2295	5684	5084	14756	4047	3215
hsa-miR-1	39	260	36	47	149	81	125	62	23	164	291	83	193	0	65	119	5	257	160	86	183	15	8	15	61	106	32	16	10	39	8	103	96	10	56	17	25	12	25	54	41	22	39	30	119	34	105	73	94
hsa-miR-7-1-3p	0	0	0	0	1	0	0	0	2	0	0	0	0	0	0	0	0	0	0	0	0	0	0	0	0	0	0	0	1	0	0	0	0	0	0	0	0	0	0	0	0	1	1	0	0	0	1	0	0
hsa-miR-7-2-3p	0	0	0	0	0	0	0	0	0	0	0	0	0	0	0	0	0	0	0	0	0	0	0	0	0	0	0	0	0	0	0	0	0	0	0	0	0	0	0	0	0	0	0	0	0	0	0	0	0
hsa-miR-7-5p	714	688	494	525	320	322	443	807	1539	402	407	810	391	196	643	612	126	310	456	1700	556	192	260	335	249	452	349	592	589	303	179	464	285	313	444	135	380	873	91	186	392	419	230	85	169	175	661	527	105
hsa-miR-9-3p	0	2	2	1	3	1	3	102	2	2	0	2	3	1	5	3	0	1	837	13	1	1	3	6	2	9	2	0	2	3	2	4	3	1	4	0	0	2	0	0	2	2	3	0	0	2	1	0	2
hsa-miR-9-5p	5	2	2	2	10	1	3	80	1	4	3	9	2	2	5	5	0	3	577	10	7	1	3	11	3	5	3	2	1	4	0	3	0	1	4	1	4	0	0	1	27	1	3	0	2	3	1	7	0
hsa-miR-10a-3p	1	4	2	1	3	3	1	5	3	2	1	4	6	1	3	15	0	5	136	14	2	0	2	2	1	15	1	1	1	1	1	27	4	1	3	3	3	0	1	2	6	0	2	0	1	0	6	3	0
hsa-miR-10a-5p	1841	2196	1145	720	2041	2705	1600	5034	550	2468	2626	2062	1853	1242	1722	4136	932	2589	8313	3296	1710	1681	1603	1991	3079	8841	2509	3096	2350	1096	862	5348	945	1845	1203	1383	4038	2334	2273	3720	6120	230	2604	1245	2263	9833	1860	3316	1529
hsa-miR-10b-3p	4	4	10	0	2	0	2	6	1	5	5	4	4	0	2	11	3	9	31	8	7	1	2	10	3	19	1	4	1	1	1	17	6	2	8	15	4	2	1	2	5	1	2	0	3	9	4	4	1
hsa-miR-10b-5p	2996	2835	1903	1364	2676	3054	2829	9797	587	3841	3809	3433	3491	2711	2418	4761	3308	3749	5791	6697	5253	2414	2463	4713	5620	12364	3245	6484	4909	2149	1677	6040	1851	3786	3073	4139	9654	5350	3588	6433	6479	571	5110	2342	3570	20223	3280	4335	1953
hsa-miR-15a-3p	0	0	0	0	0	0	0	0	0	0	0	0	0	0	0	0	0	0	0	0	0	0	0	0	0	0	0	0	0	0	0	0	0	0	0	0	0	0	0	0	0	0	0	0	0	0	0	0	0
hsa-miR-15a-5p	18	40	26	12	3	2	12	2	101	7	9	10	14	24	27	10	6	11	28	12	15	4	6	7	4	7	5	6	14	3	2	6	11	9	22	3	8	15	0	6	12	18	2	3	1	4	36	5	1
hsa-miR-15b-3p	9	20	9	29	5	6	10	8	31	6	11	7	12	21	23	6	12	10	12	34	3	14	30	12	13	6	26	19	78	11	37	5	18	82	12	9	18	39	3	15	12	30	12	12	6	10	107	8	4
hsa-miR-15b-5p	102	98	53	39	14	11	48	6	157	20	26	16	37	58	120	21	24	23	52	59	26	30	28	18	24	18	24	49	76	13	22	9	23	71	50	17	24	98	2	35	40	85	14	32	6	13	142	14	4
hsa-miR-16-1-3p	0	0	0	0	0	0	0	0	0	0	0	1	0	0	0	0	0	0	0	0	0	0	0	0	0	1	0	0	0	0	0	1	0	0	0	0	0	0	0	0	0	0	0	0	0	0	1	0	0
hsa-miR-16-2-3p	599	1125	731	596	322	301	1158	285	627	437	681	322	457	1765	962	717	3037	380	568	1519	445	598	1120	610	732	679	1448	1800	4477	402	1501	496	608	4462	1100	645	1481	2465	230	1523	1451	847	534	1629	269	1029	3433	698	313
hsa-miR-16-5p	816	562	188	209	110	133	307	45	712	102	170	150	155	227	665	158	177	173	230	327	103	138	446	172	248	72	302	469	821	102	266	127	114	1106	197	99	364	977	34	183	326	634	127	263	96	190	1225	64	50
hsa-miR-17-3p	1	1	1	0	0	0	1	0	2	0	0	1	0	0	0	1	0	0	0	0	0	0	0	0	0	1	0	1	1	0	0	1	0	0	0	1	0	0	0	0	0	0	0	0	0	0	0	0	0
hsa-miR-17-5p	138	103	70	60	73	97	76	32	474	85	87	144	71	33	142	65	39	86	132	162	43	44	71	56	96	52	50	127	125	55	64	87	37	75	86	30	80	173	23	45	69	84	46	35	36	45	147	16	30
hsa-miR-18a-3p	3	7	2	3	3	2	5	2	1	2	2	1	1	5	4	8	24	7	1	11	0	5	5	7	5	3	6	16	14	6	12	5	1	12	9	3	5	8	3	3	5	2	2	6	2	4	9	1	4
hsa-miR-18a-5p	4	3	2	3	2	0	3	0	11	2	4	7	0	0	9	1	0	3	3	13	4	2	4	1	6	1	4	8	7	2	1	1	1	3	3	1	3	11	0	4	2	3	1	1	1	2	7	1	0
hsa-miR-18b-3p	0	0	0	0	0	0	0	0	0	0	0	0	0	0	0	0	0	0	0	0	0	0	0	0	0	0	0	0	0	0	0	0	0	0	0	0	0	0	0	0	0	0	0	0	0	0	0	0	0
hsa-miR-18b-5p	0	1	1	1	0	0	1	0	1	0	0	0	0	0	0	0	1	0	0	0	0	0	0	0	0	0	0	0	0	0	0	0	0	0	1	0	0	1	0	0	0	0	0	0	0	0	1	0	0
hsa-miR-19a-3p	42	48	12	14	15	9	24	2	45	24	18	18	21	8	45	18	13	23	39	40	18	10	37	36	65	15	37	43	72	19	5	30	23	27	20	11	32	49	1	9	43	53	28	10	16	26	64	8	3
hsa-miR-19a-5p	0	0	0	0	0	0	0	0	0	0	0	0	0	0	0	0	0	0	0	0	0	0	0	0	0	0	0	0	0	0	0	0	0	0	0	0	0	0	0	0	0	0	0	0	0	0	0	0	0
hsa-miR-19b-1-5p	0	0	0	0	0	0	0	0	0	0	0	0	0	0	0	0	0	0	0	0	0	0	0	0	0	0	0	0	0	0	0	0	0	0	0	0	0	0	0	0	0	0	0	0	0	0	0	0	0
hsa-miR-19b-2-5p	0	0	0	0	0	0	0	0	0	0	0	0	0	0	0	0	0	0	0	0	0	0	0	0	0	0	0	0	0	0	0	0	0	0	0	0	0	0	0	0	0	0	0	0	0	0	0	0	0
hsa-miR-19b-3p	46	54	13	18	11	12	25	13	54	14	8	12	14	14	31	11	7	14	22	27	11	6	36	22	84	13	43	61	117	22	10	26	18	71	31	21	59	85	5	15	57	103	29	20	14	44	105	6	2
hsa-miR-20a-3p	0	0	0	0	0	0	0	0	0	0	0	0	0	0	0	0	0	0	0	0	0	0	0	0	0	0	0	0	0	0	0	0	0	0	0	0	0	0	0	0	0	0	0	0	0	0	0	0	0
hsa-miR-20a-5p	294	418	228	130	136	182	243	42	1106	171	190	272	158	127	361	132	86	203	303	257	88	116	175	83	206	71	186	273	474	100	223	207	116	298	222	74	249	375	36	122	203	221	87	98	82	154	648	49	39
hsa-miR-20b-3p	0	0	0	0	0	0	0	0	0	0	0	0	0	1	0	0	0	0	0	0	0	0	0	0	0	0	0	1	0	0	0	0	0	0	0	0	0	0	0	0	0	0	0	0	0	0	0	0	0
hsa-miR-20b-5p	42	34	18	17	9	12	23	0	117	19	10	11	13	29	42	13	17	14	27	32	11	14	26	7	11	14	19	32	39	7	28	18	16	47	13	6	22	49	3	10	18	19	10	12	2	17	50	4	2
hsa-miR-21-3p	16	10	8	8	5	5	5	2	11	3	4	9	4	2	16	9	0	10	13	9	10	3	11	6	11	8	11	2	4	12	1	13	6	6	3	3	5	4	1	1	8	6	7	2	3	1	8	0	4
hsa-miR-21-5p	12642	9433	7173	11071	11041	11447	10088	9050	13471	9553	12792	16470	9065	4952	13632	17493	2008	5421	10746	12029	12048	4128	8434	6214	13187	8705	7415	3335	5062	6780	1663	10428	9218	2002	8023	3723	6900	4891	1556	4790	14471	4039	5915	1163	6427	5276	6597	4041	1636
hsa-miR-22-3p	2055	2251	2453	1304	982	791	1694	2732	1815	1238	1481	1396	1357	2617	1860	1779	2526	1643	3088	4095	3243	1122	1798	1643	1262	3651	1873	1666	3253	825	850	2067	633	2150	3771	815	2045	2081	382	1712	2107	1204	1067	1445	582	1615	3885	1758	535
hsa-miR-22-5p	45	40	39	31	25	19	28	37	38	28	27	41	33	38	54	36	28	39	55	104	84	18	38	56	30	40	36	17	44	21	13	38	27	16	39	22	33	24	6	13	35	31	22	8	9	22	48	17	12
hsa-miR-23a-3p	135	124	49	56	76	89	62	42	66	73	88	105	119	11	122	55	19	166	125	56	75	69	121	143	134	82	62	72	57	109	43	78	164	81	51	142	54	39	25	37	64	102	111	49	63	113	59	57	37
hsa-miR-23a-5p	2	3	0	2	4	3	3	5	0	2	5	3	3	2	2	2	13	4	3	5	5	2	3	8	7	5	5	1	1	13	2	4	9	5	1	4	2	0	2	4	4	8	4	0	2	3	2	1	5
hsa-miR-23b-3p	16	13	15	11	9	8	10	13	14	13	18	14	15	5	16	18	7	24	24	14	11	13	13	16	10	27	7	6	9	9	7	11	32	9	13	22	9	7	6	8	12	7	10	6	9	11	17	11	5
hsa-miR-23b-5p	3	3	1	0	3	3	2	3	0	7	3	4	1	0	2	6	1	4	2	4	5	5	4	4	6	7	3	2	1	5	1	3	3	2	3	0	1	2	4	2	4	0	4	1	2	3	3	1	6
hsa-miR-23c	0	0	0	0	0	0	0	0	0	0	0	0	0	0	0	0	0	0	0	0	0	0	0	0	0	0	0	0	0	0	0	0	0	0	0	0	0	0	0	0	0	0	0	0	0	0	0	0	0
hsa-miR-24-1-5p	0	3	0	2	0	0	1	4	1	0	0	1	2	3	1	0	0	1	3	2	1	1	4	2	2	2	2	2	1	0	1	2	1	1	0	2	1	1	0	0	2	0	2	0	0	3	0	0	0
hsa-miR-24-2-5p	40	53	27	32	21	32	30	28	28	25	29	33	38	7	38	33	7	37	61	39	32	24	33	61	37	36	23	19	11	30	10	20	32	22	21	30	19	13	5	13	31	40	33	7	16	33	14	9	6
hsa-miR-24-3p	2750	2411	1259	1459	1717	1676	1123	1066	1601	1733	1476	2269	2173	567	2726	1237	351	2443	3777	1748	2687	962	2002	2572	2227	1425	1292	1258	888	3220	631	2079	2044	1221	1893	2142	1083	793	525	734	1633	2873	1565	481	845	1355	1105	504	776
hsa-miR-25-3p	7686	11373	5051	5234	2635	2755	7568	1732	7594	2429	3786	2448	3030	6066	6701	3334	9892	2549	2452	6712	1322	3766	6393	2994	5808	2766	9467	15148	29662	3434	10186	2703	3223	34463	4957	4965	10646	25941	1611	7008	8374	6976	5909	11171	3221	8142	24320	3432	2119
hsa-miR-25-5p	9	10	18	7	5	12	11	9	3	8	5	4	3	12	8	11	35	3	6	29	4	9	10	9	7	8	11	24	36	8	9	4	7	33	6	8	12	20	3	10	14	7	14	9	3	14	16	6	8
hsa-miR-26a-1-3p	0	0	0	0	0	0	0	0	0	0	0	0	0	0	0	0	0	0	0	0	0	0	0	0	0	0	0	0	0	0	0	0	0	0	0	0	0	0	0	0	0	0	0	0	0	0	0	0	0
hsa-miR-26a-2-3p	0	0	1	1	0	0	0	4	1	0	0	1	0	2	1	1	0	0	1	3	0	0	1	2	0	0	0	0	1	1	0	0	0	0	1	0	0	2	0	0	0	0	0	0	0	0	0	0	0
hsa-miR-26a-5p	5296	3255	3186	4371	7131	8423	5881	6238	3598	7523	8323	11859	5971	1602	8775	8774	959	6001	6492	9885	6164	5596	4547	6726	12891	5019	4243	3696	2277	5674	1388	6260	4507	1111	5746	4959	4232	3966	2042	4004	9628	2552	5091	1295	5212	4492	1825	2308	4344
hsa-miR-26b-3p	2	2	0	1	4	3	2	5	1	1	4	4	2	0	1	3	0	6	0	2	0	4	5	3	10	3	6	2	4	2	2	2	2	4	0	3	3	6	0	1	10	2	4	3	2	3	6	1	0
hsa-miR-26b-5p	734	657	704	367	363	461	345	323	2592	616	462	1041	540	122	821	527	119	629	1254	729	573	222	290	465	597	257	195	449	379	264	74	489	349	218	534	139	281	1065	64	185	429	636	187	82	157	216	463	112	119
hsa-miR-27a-3p	3485	2538	1015	2308	1206	990	1324	1042	2195	1608	1788	2163	3374	612	2602	1632	402	2255	4879	2629	3160	1151	2030	3759	2914	1029	934	1081	955	2642	528	1337	2654	1067	1208	1610	1160	930	304	856	1640	3045	1465	324	836	1574	1370	466	275
hsa-miR-27a-5p	36	50	27	30	17	17	8	27	11	33	32	32	28	4	66	32	1	38	34	28	62	12	14	45	13	23	19	9	9	49	2	55	47	7	28	8	10	3	20	10	13	18	23	3	13	24	9	14	14
hsa-miR-27b-3p	709	822	392	504	470	491	510	634	390	588	609	681	660	453	1062	742	179	704	1148	1132	920	335	925	563	859	552	758	387	573	402	215	545	633	339	400	353	663	397	132	302	981	349	906	140	549	774	812	291	148
hsa-miR-27b-5p	0	1	4	0	5	5	2	1	1	2	2	5	1	0	2	5	0	1	2	5	0	0	0	0	4	3	2	0	0	2	0	2	1	0	1	4	2	1	1	1	7	0	3	1	1	2	0	1	0
hsa-miR-28-3p	515	283	226	168	406	412	240	304	180	334	320	445	244	87	259	312	109	284	194	187	171	208	285	250	333	275	265	201	172	297	91	310	145	159	192	206	211	200	179	285	276	149	340	186	244	309	129	135	293
hsa-miR-28-5p	26	15	15	13	27	26	17	25	12	25	24	37	14	5	30	20	3	18	16	20	9	16	17	14	27	9	10	5	4	13	3	15	9	4	14	9	6	7	4	7	17	6	12	4	12	11	5	4	4
hsa-miR-29a-3p	1578	266	304	167	106	112	159	283	685	166	186	143	261	148	682	548	21	207	1701	399	442	124	252	299	381	1362	199	216	158	109	49	1281	326	201	123	463	305	257	70	170	296	208	310	83	156	459	557	198	37
hsa-miR-29a-5p	1	0	0	0	0	0	0	0	0	0	0	0	0	0	0	0	0	0	0	0	0	0	0	0	0	0	0	0	0	0	0	0	0	0	0	0	0	0	0	0	0	0	0	0	0	0	0	0	0
hsa-miR-29b-1-5p	0	0	0	0	0	0	0	0	0	0	0	0	0	0	0	0	0	0	0	0	0	0	0	0	0	0	0	0	0	0	0	0	0	0	0	0	0	0	0	0	0	0	0	0	0	0	0	0	0
hsa-miR-29b-2-5p	0	0	0	0	0	0	0	0	0	0	0	0	0	0	0	0	0	0	0	0	0	0	0	0	0	0	0	0	0	0	0	0	0	0	0	0	0	0	0	0	0	0	0	0	0	0	0	0	0
hsa-miR-29b-3p	28	4	4	3	3	2	1	0	33	1	1	6	2	0	10	2	2	5	11	9	9	2	6	10	10	2	1	6	6	1	1	8	4	7	4	3	2	18	0	3	4	9	2	1	1	6	8	2	0
hsa-miR-29c-3p	21	4	6	4	0	0	4	0	17	2	1	1	3	9	3	2	3	3	10	7	2	1	7	3	6	1	2	2	5	0	1	5	2	3	4	2	6	6	0	2	6	5	1	2	2	4	13	2	0
hsa-miR-29c-5p	6	3	1	0	2	0	1	3	1	0	1	0	1	0	1	2	0	0	1	4	0	1	1	0	0	1	1	1	1	0	0	0	0	1	0	2	0	2	0	0	0	0	0	0	0	0	1	0	0
hsa-miR-30a-3p	112	91	73	48	48	53	44	124	50	83	67	99	70	29	79	101	16	74	103	143	147	53	58	90	76	70	43	48	63	36	24	93	58	33	54	39	87	57	39	74	99	21	51	29	47	188	34	66	23
hsa-miR-30a-5p	331	307	153	129	144	192	164	258	132	207	240	269	219	79	224	404	65	263	282	392	362	181	460	279	384	381	269	255	261	82	92	259	228	178	193	163	371	216	100	181	430	63	322	115	198	651	261	186	61
hsa-miR-30b-3p	2	0	1	0	2	2	1	2	0	0	2	2	0	2	3	0	5	1	0	3	2	1	1	2	2	0	0	2	2	2	1	2	2	1	0	1	1	1	0	2	3	1	1	0	0	1	0	0	2
hsa-miR-30b-5p	11	3	1	5	2	0	4	2	15	5	2	6	3	0	8	3	2	3	7	5	10	2	6	3	5	3	3	7	7	6	2	5	5	5	4	6	2	37	1	4	9	10	6	1	3	3	2	4	2
hsa-miR-30c-1-3p	0	4	2	1	3	4	2	4	1	4	1	3	4	0	4	3	0	1	2	1	6	2	1	0	6	2	1	1	0	3	0	1	1	0	2	0	1	0	1	0	3	1	1	0	2	0	0	1	2
hsa-miR-30c-2-3p	2	3	0	1	1	1	0	2	0	0	1	3	0	2	0	2	0	2	0	2	10	0	0	1	1	0	1	3	2	0	1	0	1	1	1	1	1	0	0	3	4	1	1	0	1	3	0	1	1
hsa-miR-30c-5p	235	130	98	169	248	202	169	197	220	176	238	294	168	59	343	237	50	203	234	375	232	178	135	325	320	233	172	255	132	258	83	221	117	125	269	282	174	411	103	247	313	104	262	83	176	231	94	162	148
hsa-miR-30d-3p	5	3	2	4	2	5	3	0	3	3	5	3	2	2	3	1	0	1	4	2	0	1	2	2	4	1	1	1	1	2	0	2	0	1	1	0	1	1	0	0	1	1	0	0	1	3	2	0	0
hsa-miR-30d-5p	4535	6719	3049	3129	5560	8111	5579	4746	3230	5097	8049	5706	4848	5903	6150	5827	6007	5361	3697	5060	2397	5243	9429	3964	8008	4158	7425	9066	13318	4137	4999	3371	2929	13063	4952	4488	6620	9551	2592	6032	8124	3266	6661	7006	4382	8538	9199	3455	4532
hsa-miR-30e-3p	334	316	231	280	349	366	257	391	329	331	336	459	298	83	500	373	39	223	322	359	507	198	264	296	439	215	224	227	170	291	84	344	325	141	278	202	219	304	139	204	346	172	308	106	261	287	125	135	164
hsa-miR-30e-5p	918	604	329	303	215	298	315	178	802	219	275	308	301	287	645	308	410	313	377	577	365	226	590	409	639	224	576	642	1055	260	127	359	209	849	366	176	640	757	70	219	603	608	378	263	192	419	1298	149	96
hsa-miR-31-3p	0	0	0	0	0	0	0	0	0	0	0	0	0	0	0	0	0	0	0	0	0	0	0	0	0	0	0	0	0	0	0	0	0	0	0	0	0	0	0	0	0	0	0	0	0	0	0	0	0
hsa-miR-31-5p	4	0	0	0	0	0	0	0	2	0	0	0	0	0	2	0	0	0	0	0	0	0	0	0	0	0	0	0	0	0	0	0	0	0	0	0	0	0	0	0	1	0	0	0	0	0	0	1	0
hsa-miR-32-3p	0	1	2	0	1	3	1	0	1	1	0	4	2	1	1	1	0	2	0	3	0	0	1	1	2	0	1	0	0	1	0	0	2	0	0	0	0	0	0	0	1	1	0	0	1	0	1	0	0
hsa-miR-32-5p	44	59	46	105	27	16	36	24	181	41	41	48	64	86	75	64	35	37	143	156	99	11	37	70	45	28	23	18	25	17	7	31	102	11	66	14	28	46	2	19	41	27	7	2	9	14	86	13	2
hsa-miR-33a-3p	0	0	0	0	0	0	0	0	0	0	0	0	0	0	0	0	0	0	0	0	0	0	0	0	0	0	0	0	0	0	0	0	0	0	0	0	0	0	0	0	0	0	0	0	0	0	0	0	0
hsa-miR-33a-5p	0	0	0	0	0	0	0	0	0	1	0	0	0	0	0	2	0	0	0	0	1	0	0	0	1	0	0	1	0	0	0	2	0	0	0	0	0	0	0	0	1	0	0	0	0	0	0	0	0
hsa-miR-33b-3p	0	0	0	0	0	0	0	0	0	0	0	0	0	0	0	0	0	0	0	0	0	0	0	0	0	0	0	0	0	0	0	0	0	0	0	0	0	0	0	0	0	0	0	0	0	0	0	0	0
hsa-miR-33b-5p	0	0	0	0	0	0	0	0	0	0	0	0	0	0	0	0	0	0	0	0	0	0	0	0	0	0	0	0	0	0	0	0	0	0	0	0	0	0	0	0	0	0	0	0	0	0	0	0	0
hsa-miR-34a-3p	0	0	0	0	0	0	0	0	0	0	1	0	0	0	0	0	0	0	0	0	0	0	0	0	0	0	0	0	0	0	0	0	0	0	0	0	0	0	0	0	0	0	0	0	0	0	0	0	0
hsa-miR-34a-5p	0	0	0	0	0	0	0	2	0	0	0	0	0	0	0	0	0	0	0	0	1	0	1	0	1	0	0	0	1	0	0	0	0	0	0	0	0	1	0	0	1	0	0	0	0	1	0	0	0
hsa-miR-34b-3p	0	0	0	0	0	0	0	0	0	0	0	0	0	0	2	0	0	0	0	0	0	0	0	0	0	0	0	0	0	0	0	0	0	0	0	0	0	0	0	0	4	0	0	0	0	0	0	0	0
hsa-miR-34b-5p	0	0	0	0	0	0	0	0	0	0	0	0	0	0	0	0	0	0	0	0	0	0	0	0	0	0	0	0	0	0	0	0	0	0	0	0	0	0	0	0	0	0	0	0	0	0	0	0	0
hsa-miR-34c-3p	0	0	0	0	0	0	0	2	0	0	0	0	0	0	0	0	0	0	0	0	0	0	0	0	0	0	0	0	0	0	0	0	0	0	0	0	0	0	0	0	0	0	0	0	0	0	0	0	0
hsa-miR-34c-5p	1	3	0	0	1	0	0	18	0	0	1	0	0	1	29	2	0	1	1	0	1	0	2	0	5	1	3	2	0	2	0	0	4	1	0	0	1	1	0	0	9	2	2	0	0	2	1	1	0
hsa-miR-92a-1-5p	2	0	0	0	0	0	0	0	0	4	0	1	0	0	1	1	0	1	2	0	3	0	0	0	0	1	1	3	0	0	0	0	0	0	0	1	0	0	0	0	2	1	1	0	0	1	0	0	1
hsa-miR-92a-2-5p	0	0	0	0	0	0	0	0	0	0	0	0	0	0	0	0	0	0	0	0	0	0	0	0	0	0	0	0	0	0	0	0	0	0	0	0	0	0	0	0	0	0	0	0	0	0	0	0	0
hsa-miR-92a-3p	3882	6150	3947	3974	4278	5473	9372	5509	2477	3787	5833	2658	3626	25382	4239	6220	26637	4046	2876	9898	1737	4806	4075	2973	4324	5915	7468	17107	23505	2162	8156	2308	2356	25267	7412	2927	9874	20710	2172	11014	8050	2700	4253	12414	2768	9927	17286	6313	4666
hsa-miR-92b-3p	14	20	16	11	8	15	26	59	8	7	18	8	13	59	16	31	82	16	70	40	5	14	27	8	15	80	24	42	64	5	20	13	4	54	23	9	45	45	10	30	114	5	8	39	7	48	47	12	15
hsa-miR-92b-5p	2	6	8	3	1	2	9	37	1	1	2	0	1	35	2	4	66	0	19	18	5	3	2	1	2	21	6	15	18	3	7	2	1	19	3	3	13	15	0	12	35	2	3	7	2	12	10	5	2
hsa-miR-93-3p	3	1	0	0	0	0	2	0	1	1	2	0	1	0	0	0	0	2	1	2	0	0	3	4	2	0	1	5	3	2	1	0	0	5	1	0	3	4	0	0	2	2	1	2	0	2	2	1	1
hsa-miR-93-5p	250	234	138	118	111	119	116	51	665	107	131	142	112	83	253	105	103	157	293	248	160	91	127	115	154	88	126	224	308	117	166	136	76	327	162	88	171	352	31	73	141	216	84	88	47	99	375	48	65
hsa-miR-95-3p	46	7	9	5	6	7	7	12	7	8	7	7	4	1	10	14	4	6	21	20	39	4	8	11	9	4	7	11	9	2	2	13	4	5	3	2	14	11	3	5	22	5	7	1	6	16	4	2	0
hsa-miR-95-5p	0	0	0	0	0	0	0	0	0	0	0	0	0	0	0	0	0	0	0	0	0	0	0	0	0	0	0	0	0	0	0	0	0	0	0	0	0	0	0	0	0	0	0	0	0	0	0	0	0
hsa-miR-96-3p	0	0	0	0	0	0	0	0	0	0	0	0	0	0	0	0	0	0	0	0	0	0	0	0	0	0	0	0	0	0	0	0	0	0	0	0	0	0	0	0	0	0	0	0	0	0	0	0	0
hsa-miR-96-5p	15	16	5	16	0	2	3	7	47	0	4	9	4	5	10	1	0	5	28	12	15	3	3	17	3	5	7	9	4	4	3	10	3	4	3	1	7	32	0	2	1	7	0	1	1	1	11	7	0
hsa-miR-98-3p	0	0	0	0	0	1	0	0	0	0	0	0	0	0	0	0	0	0	0	0	0	0	0	1	1	0	0	0	0	1	0	0	1	1	0	0	1	1	0	1	0	1	1	1	0	0	1	0	0
hsa-miR-98-5p	126	135	77	102	168	260	149	134	170	164	172	302	136	42	275	195	16	133	212	286	106	103	92	130	312	95	118	128	86	133	37	155	108	48	169	68	109	150	46	80	273	88	97	25	123	104	116	57	94
hsa-miR-99a-3p	0	0	0	0	0	0	0	0	0	0	0	0	0	0	0	1	0	0	0	0	0	0	0	0	0	0	0	0	0	0	0	0	0	0	0	0	0	0	0	0	0	0	0	0	0	0	0	0	0
hsa-miR-99a-5p	1951	2039	1421	1198	1688	1832	1714	4535	638	2669	2719	1511	1917	1686	2051	2359	2501	4288	2751	3930	3903	1895	3019	3335	2178	6007	2235	1932	2063	843	794	1249	1198	1498	842	2004	2168	980	621	1393	3104	350	4157	589	1925	4047	1857	2005	532
hsa-miR-99b-3p	15	6	7	14	8	30	17	38	7	10	29	10	7	9	7	24	1	9	10	6	16	8	18	15	30	16	8	12	5	8	6	22	8	5	10	15	13	6	7	9	12	3	25	13	11	19	5	7	9
hsa-miR-99b-5p	336	167	183	127	405	972	402	1180	77	316	676	472	264	224	314	619	263	347	220	295	331	216	170	287	602	886	229	236	197	163	133	592	118	132	209	288	341	212	258	364	461	40	463	210	273	717	100	188	355
hsa-miR-100-3p	0	0	0	0	0	0	0	0	0	0	0	0	0	0	0	0	0	0	0	0	0	0	0	0	0	0	0	0	0	0	0	0	0	0	0	0	0	0	0	0	0	0	0	0	0	0	0	0	0
hsa-miR-100-5p	468	400	145	217	148	139	164	473	61	265	265	262	400	247	385	515	192	385	215	423	424	195	466	387	545	2955	696	407	473	303	163	789	392	803	1016	543	501	283	222	339	637	197	743	108	528	971	539	473	96
hsa-miR-101-3p	3284	7053	3339	3418	931	799	3168	873	9265	1350	2016	1245	1840	2917	3502	2770	963	879	2067	3873	1231	606	1827	1299	1719	728	2412	1734	5055	672	875	1277	2302	2653	2174	607	2424	3741	159	1112	1800	1768	811	593	525	1182	8384	960	72
hsa-miR-101-5p	0	0	0	0	0	0	0	0	0	0	0	0	0	0	0	0	0	0	0	0	0	0	0	0	0	0	0	0	0	0	0	0	0	0	0	0	0	0	0	0	0	0	0	0	0	0	0	0	0
hsa-miR-103a-2-5p	0	0	0	0	0	0	0	0	0	0	0	0	0	0	0	0	0	0	0	0	0	0	0	0	0	0	0	0	0	0	0	0	0	0	0	0	0	0	0	0	0	0	0	0	0	0	0	0	0
hsa-miR-103a-3p	919	785	680	332	588	1062	386	280	3207	897	777	1781	800	189	1316	575	188	912	1129	529	445	346	105	215	500	210	183	340	241	487	169	669	464	147	853	166	133	504	176	216	345	569	133	59	179	99	416	102	286
hsa-miR-103b	0	0	0	0	0	0	0	0	0	0	0	0	0	0	0	0	0	0	0	0	0	0	0	0	0	0	0	0	0	0	0	0	0	0	0	0	0	0	0	0	0	0	0	0	0	0	0	0	0
hsa-miR-105-3p	0	0	0	0	0	0	0	0	0	0	0	0	0	0	0	0	0	0	0	0	0	0	0	0	0	0	0	0	0	0	0	0	0	0	0	0	0	0	0	0	0	0	0	0	0	0	0	0	0
hsa-miR-105-5p	0	0	0	0	0	0	0	0	0	0	0	0	0	0	0	0	0	0	0	0	0	0	0	0	0	0	0	0	0	0	0	0	0	0	0	0	0	0	0	0	0	0	0	0	0	0	0	0	0
hsa-miR-106a-3p	0	0	0	0	0	0	0	0	0	0	0	0	0	0	0	0	0	0	0	0	0	0	0	0	0	0	0	0	1	0	0	0	0	0	0	0	0	0	0	0	0	0	0	0	0	0	0	0	0
hsa-miR-106a-5p	10	13	10	2	6	6	7	0	48	7	4	5	9	1	17	8	6	6	12	9	7	4	8	2	3	2	4	11	13	2	10	11	3	14	7	2	6	14	2	2	4	6	3	3	1	5	16	0	1
hsa-miR-106b-3p	579	566	233	220	255	399	241	213	589	228	284	264	164	138	465	237	233	280	160	288	110	194	489	308	302	114	344	453	714	191	246	194	153	754	207	140	334	723	97	177	270	365	311	217	169	291	517	139	127
hsa-miR-106b-5p	72	91	62	66	19	16	33	9	214	28	25	32	35	67	56	31	28	18	131	86	100	13	34	33	25	32	28	51	80	17	11	24	28	56	68	16	37	108	4	22	39	47	10	13	6	19	125	18	2
hsa-miR-107	118	141	164	84	28	25	81	44	262	44	63	53	86	162	85	54	126	69	119	125	79	49	38	32	38	65	45	45	105	30	44	33	45	89	222	31	42	89	12	80	67	94	18	27	10	22	225	52	11
hsa-miR-122-3p	0	0	0	0	0	0	0	0	0	0	0	0	0	0	1	0	0	0	1	2	0	0	0	0	1	0	0	0	4	1	0	0	0	0	0	0	1	0	0	0	1	0	1	1	1	0	0	0	0
hsa-miR-122-5p	7192	19721	5083	24795	5833	6405	11299	29753	1528	18533	19178	5183	7045	7118	12919	8308	5562	9390	12058	27155	57380	7276	123246	5366	19001	13778	54678	10941	45121	3403	7405	7649	16244	7082	2908	7301	37226	5413	1901	10358	44545	2094	88000	2323	64543	28288	30849	24467	2040
hsa-miR-124-3p	0	0	0	0	0	0	0	0	0	0	0	0	0	0	0	0	0	0	1	0	0	0	1	0	0	0	0	0	0	0	0	0	0	0	0	0	0	0	0	0	0	0	0	0	0	0	0	0	0
hsa-miR-124-5p	0	0	0	0	0	0	0	0	0	0	0	0	0	0	0	0	0	0	0	0	0	0	0	0	0	0	0	0	0	0	0	0	0	0	0	0	0	0	0	0	0	0	0	0	0	0	0	0	0
hsa-miR-125a-3p	45	19	32	15	27	26	17	43	6	29	42	31	83	3	24	25	3	13	17	9	61	15	4	76	18	34	5	8	7	95	8	20	60	8	53	17	8	5	29	12	13	19	11	2	9	6	6	2	14
hsa-miR-125a-5p	82	69	60	19	100	387	129	636	18	162	219	164	130	61	96	136	62	203	108	123	91	103	57	94	283	159	102	268	158	45	30	215	11	76	93	65	233	94	125	147	238	5	100	147	122	933	40	67	231
hsa-miR-125b-1-3p	1	4	0	1	0	1	1	6	0	1	0	0	1	0	2	0	0	1	4	2	2	0	1	0	1	14	1	1	1	1	0	10	0	0	2	2	1	0	0	0	1	0	1	0	1	4	1	0	1
hsa-miR-125b-2-3p	6	4	1	2	1	2	2	14	2	7	2	3	6	3	5	3	1	7	5	5	5	1	4	1	4	9	7	2	5	1	1	8	4	5	3	3	5	3	1	4	9	1	11	2	7	7	7	2	2
hsa-miR-125b-5p	20	39	25	9	34	60	41	118	3	53	61	41	45	46	37	56	60	94	37	66	42	32	40	38	80	394	66	88	67	18	23	68	13	47	57	43	93	29	27	37	92	3	48	29	56	231	51	49	29
hsa-miR-126-3p	7742	4400	3883	5228	4478	5113	4830	7858	4147	6585	6293	8137	5278	1743	7468	7185	723	3810	7355	10535	9077	3577	4716	6749	6050	2941	2567	2514	2534	2014	874	4207	2436	1022	2869	3302	3265	3730	1008	2672	4207	1406	2955	878	2408	6179	1369	1568	957
hsa-miR-126-5p	83	51	27	41	66	70	58	66	41	58	69	93	74	31	88	77	6	59	68	95	73	51	111	77	123	57	76	67	68	38	17	87	51	44	87	58	86	74	24	68	138	33	50	37	65	127	61	27	28
hsa-miR-127-3p	3	4	1	3	7	9	8	24	1	5	31	7	7	3	12	2	0	18	11	1	4	7	6	11	28	2	9	7	5	7	0	3	2	1	12	3	11	5	4	9	20	0	9	1	7	9	4	5	37
hsa-miR-127-5p	1	0	0	0	1	0	0	4	0	0	0	0	0	0	1	0	0	0	4	0	2	0	1	0	2	0	0	0	0	0	0	0	0	0	1	0	2	0	0	1	1	0	0	0	0	0	0	0	2
hsa-miR-128-1-5p	0	1	0	0	1	0	0	0	1	0	0	1	0	0	0	0	0	1	0	0	0	0	0	0	1	0	0	0	0	0	0	0	0	0	0	0	0	0	0	0	0	0	0	0	0	0	0	0	0
hsa-miR-128-2-5p	0	0	0	0	0	0	0	0	0	0	0	0	0	0	0	0	0	0	0	0	0	0	0	0	0	0	0	0	0	0	0	0	0	0	0	0	0	0	0	0	0	0	0	0	0	0	0	0	0
hsa-miR-128-3p	257	1049	625	338	1195	1908	1300	1413	109	923	1118	1111	785	1288	946	1205	1511	973	599	1471	848	1032	1151	731	1335	579	877	1274	1424	575	522	698	248	1159	640	441	980	771	402	745	1376	169	886	1036	792	1503	863	314	1060
hsa-miR-129-1-3p	0	0	0	0	0	0	0	0	0	0	0	0	0	0	0	0	0	0	0	0	0	0	0	0	0	0	0	0	0	0	0	0	0	0	0	0	0	0	0	0	0	0	0	0	0	0	0	0	0
hsa-miR-129-2-3p	0	0	0	0	0	0	0	0	0	0	0	0	0	0	0	0	0	0	0	0	0	0	0	0	0	0	0	0	0	0	0	0	0	0	0	0	0	0	0	0	0	0	0	0	0	0	0	0	0
hsa-miR-129-5p	5	4	9	1	6	3	5	19	2	10	7	6	6	6	8	10	5	11	11	8	10	11	2	16	8	71	6	19	6	6	5	19	5	5	5	6	6	4	2	2	5	1	14	3	4	16	5	16	3
hsa-miR-130a-3p	20	23	14	26	18	6	17	12	21	7	16	15	15	9	22	24	26	13	123	31	19	7	14	11	14	86	8	8	13	4	6	18	11	18	16	15	8	4	1	18	17	7	7	2	3	3	28	7	2
hsa-miR-130a-5p	0	0	0	0	0	0	0	0	0	0	0	0	0	0	0	0	0	0	0	0	0	0	0	0	0	0	0	0	0	0	0	0	0	0	0	0	0	0	0	0	0	0	0	0	0	0	0	0	0
hsa-miR-130b-3p	13	14	22	16	9	5	11	20	11	12	6	8	15	17	16	20	8	9	259	22	39	7	9	8	6	20	5	6	8	9	6	11	10	8	15	14	3	6	2	10	7	10	3	4	3	2	19	3	1
hsa-miR-130b-5p	0	18	9	1	54	122	48	57	0	49	37	40	18	4	27	35	8	27	11	18	0	32	17	11	20	8	20	33	14	12	10	12	0	8	10	6	18	7	14	10	26	0	10	17	21	33	6	7	39
hsa-miR-132-3p	2	0	0	1	0	3	3	3	0	5	0	4	1	0	4	1	0	1	1	2	3	0	5	3	8	1	1	2	1	3	1	0	1	0	1	2	0	1	0	2	3	2	0	1	1	0	2	1	1
hsa-miR-132-5p	2	7	3	1	0	1	3	2	1	2	1	0	1	0	3	1	0	3	0	2	3	0	3	4	2	0	0	1	1	7	1	0	0	2	0	5	1	4	0	0	1	1	0	0	2	3	1	0	0
hsa-miR-133a-3p	6	1	0	9	4	0	2	0	1	1	3	0	0	3	1	0	2	6	3	7	6	2	2	0	9	2	10	6	3	8	0	3	11	18	2	5	4	3	0	15	4	5	19	9	12	5	1	5	10
hsa-miR-133a-5p	0	0	0	0	0	0	0	0	0	0	0	0	0	0	0	0	0	0	0	0	1	0	0	0	0	0	0	0	0	0	0	0	0	0	0	0	0	0	0	0	0	0	0	0	0	0	0	0	0
hsa-miR-133b	0	0	0	0	0	0	0	0	0	0	0	0	0	0	0	0	0	0	0	0	0	0	0	0	0	0	0	0	0	0	0	0	0	0	0	0	0	0	0	0	0	0	0	0	0	0	0	0	0
hsa-miR-134-3p	0	0	0	0	0	0	0	0	0	0	0	0	0	0	0	0	0	0	0	0	0	0	0	0	0	0	0	0	0	0	0	0	0	0	0	0	0	0	0	0	0	0	0	0	0	0	0	0	0
hsa-miR-134-5p	315	129	209	94	263	337	118	259	37	142	536	137	132	114	264	51	24	530	142	31	166	129	125	174	257	64	210	113	68	247	59	52	68	60	389	81	94	74	159	500	151	13	80	42	95	58	136	57	668
hsa-miR-135a-3p	0	0	0	0	0	0	0	0	0	0	0	1	1	0	0	0	0	0	0	0	0	0	0	0	1	1	0	0	0	0	0	0	0	0	0	0	0	0	0	0	0	0	0	0	0	0	0	0	0
hsa-miR-135a-5p	0	0	0	0	0	0	0	0	0	0	0	0	0	0	0	0	0	0	0	0	0	0	0	0	0	0	0	0	0	0	0	4	0	0	0	1	0	1	0	0	0	0	0	0	0	1	0	0	0
hsa-miR-135b-3p	0	0	0	0	0	0	0	1	0	0	0	0	0	0	0	0	0	0	2	0	0	0	0	0	0	1	0	0	0	0	0	0	1	0	0	0	0	0	0	0	0	0	0	0	0	0	0	0	0
hsa-miR-135b-5p	0	0	0	0	0	0	0	0	0	0	0	1	0	0	0	1	0	0	7	0	0	0	0	0	0	0	0	0	0	0	0	4	1	0	0	0	0	0	0	0	3	0	0	0	0	0	0	0	0
hsa-miR-136-3p	4	2	0	2	3	3	3	0	1	0	7	2	0	3	3	1	0	5	5	1	0	0	2	5	7	0	2	3	0	1	0	0	2	0	4	0	4	1	0	4	5	0	1	0	3	2	3	0	0
hsa-miR-136-5p	1	0	0	0	1	2	1	3	0	1	4	0	0	0	1	0	0	3	1	0	0	0	1	3	3	0	0	0	1	0	0	0	1	0	1	0	1	0	0	0	1	0	0	0	0	1	0	0	0
hsa-miR-137	0	0	0	0	0	0	0	0	0	0	0	0	0	0	0	0	0	0	0	0	0	0	0	0	0	0	0	0	0	0	0	0	0	0	0	0	0	0	0	0	0	0	0	0	0	0	0	0	0
hsa-miR-138-1-3p	0	0	0	0	0	0	0	0	0	0	0	0	0	0	0	0	0	0	0	0	0	0	0	0	0	0	0	0	0	0	0	0	0	0	0	0	0	0	0	0	0	0	0	0	0	0	0	0	0
hsa-miR-138-2-3p	0	0	0	0	0	0	0	0	0	0	0	0	0	0	0	0	0	0	0	0	0	0	0	0	0	0	0	0	0	0	0	0	0	0	0	0	0	0	0	0	0	0	0	0	0	0	0	0	0
hsa-miR-138-5p	0	0	0	0	0	0	0	0	0	0	0	0	0	0	0	0	0	0	0	0	0	0	0	0	0	0	0	0	0	0	0	1	0	0	0	0	0	0	0	0	0	0	0	0	0	0	0	0	0
hsa-miR-139-3p	11	15	16	9	25	68	29	52	0	51	18	26	17	6	17	43	17	15	14	37	30	18	27	9	28	20	22	27	26	10	8	21	6	6	13	16	38	12	18	22	22	3	22	21	32	64	4	13	30
hsa-miR-139-5p	116	47	51	46	64	151	75	186	8	138	82	144	41	48	94	99	43	81	54	173	154	58	91	90	93	63	54	67	51	33	29	66	15	27	33	40	90	50	37	84	59	11	61	40	59	190	18	34	45
hsa-miR-140-3p	7189	2660	1650	1097	611	477	1237	263	4277	643	728	606	1099	920	1867	525	758	1006	1785	1279	659	682	1070	551	756	272	768	1290	2209	643	909	430	755	3443	997	658	859	2045	222	726	658	2362	601	722	281	539	3061	439	208
hsa-miR-140-5p	66	44	14	17	24	19	27	13	20	17	25	32	20	6	52	13	27	23	36	46	30	13	42	26	104	24	49	59	59	46	14	39	22	66	37	26	46	38	15	17	54	55	41	15	27	54	45	17	9
hsa-miR-141-3p	2	3	0	0	0	0	1	4	1	1	2	0	0	0	1	15	0	0	3	1	0	0	2	1	2	1	0	0	0	0	0	16	7	0	0	0	1	0	0	0	11	0	0	0	0	1	2	2	0
hsa-miR-141-5p	0	0	0	0	0	0	0	3	0	0	0	0	0	0	0	0	0	0	0	0	0	0	0	0	0	0	0	0	0	0	0	0	0	0	0	0	0	0	0	0	0	0	0	0	0	0	0	0	0
hsa-miR-142-3p	145	100	109	119	106	98	91	102	208	124	137	229	120	26	206	182	8	104	164	212	240	44	56	151	186	94	72	78	29	68	4	157	104	14	105	65	46	87	14	30	127	54	56	8	58	59	43	27	13
hsa-miR-142-5p	4673	1592	1015	1100	426	336	1011	317	4230	613	680	615	1318	989	1763	698	526	839	2578	1825	1019	505	1268	1260	1704	604	783	1079	1862	1159	537	636	1253	2488	810	1015	1086	2542	171	1151	1104	2965	941	587	323	762	2637	386	170
hsa-miR-143-3p	780	4367	530	1057	1158	899	1342	352	853	804	1493	2824	892	219	1873	868	641	937	2278	885	2166	542	900	1038	4054	597	1069	1674	1086	1723	245	890	1416	1170	702	654	1563	715	248	406	1535	3616	2042	478	1300	2172	1383	7920	138
hsa-miR-143-5p	0	2	0	0	0	0	0	0	0	0	1	3	0	0	0	0	2	0	0	0	4	0	0	0	0	0	1	1	0	0	0	0	0	0	1	0	0	0	0	0	0	0	0	0	0	1	0	4	0
hsa-miR-144-3p	369	483	339	375	81	43	125	63	1193	115	145	98	93	294	340	237	43	101	423	842	161	23	75	221	120	91	136	179	235	40	27	161	83	58	145	26	133	327	11	42	133	134	31	15	24	64	556	29	2
hsa-miR-144-5p	156	54	68	85	36	22	25	9	604	34	36	60	25	19	93	54	12	42	133	322	33	17	20	110	31	36	39	231	59	35	22	49	15	42	63	8	45	466	15	48	44	111	26	11	8	21	76	12	10
hsa-miR-145-3p	35	120	31	69	53	51	35	39	42	51	59	74	87	21	74	58	46	103	109	68	88	31	47	140	127	56	53	63	37	112	16	59	125	53	43	85	62	26	22	35	69	113	75	17	36	102	47	98	17
hsa-miR-145-5p	1	1	0	0	0	1	1	1	0	0	0	0	1	0	3	0	3	1	3	1	0	0	0	0	0	0	0	1	1	2	0	1	0	1	0	1	0	1	0	0	0	5	0	0	1	0	0	9	0
hsa-miR-146a-3p	11	0	0	0	4	0	1	0	2	0	0	0	0	0	2	0	0	0	0	0	3	1	2	1	5	1	1	0	1	0	0	3	0	0	0	1	0	0	0	2	0	0	0	0	0	2	0	0	0
hsa-miR-146a-5p	20941	2090	2510	830	2255	3607	1386	1264	4990	2217	2301	4350	2085	311	3205	1869	209	3890	1442	1433	848	1608	2547	1401	2547	1784	2310	1278	1091	1777	1081	2865	1212	1164	1290	1277	1139	1674	628	1456	1685	1832	1215	759	1194	1306	1267	806	1932
hsa-miR-146b-3p	21	3	6	0	4	4	2	1	6	2	1	3	3	1	6	1	1	1	3	1	0	1	11	2	4	2	2	3	2	1	1	2	1	4	0	4	3	5	0	4	4	2	6	2	2	3	1	1	1
hsa-miR-146b-5p	2098	719	769	597	805	1303	737	948	768	898	965	1100	787	266	1227	1167	128	741	949	1144	778	598	1592	513	1802	689	700	942	694	561	306	1507	590	759	572	837	898	1050	262	611	1296	473	844	405	670	838	548	452	524
hsa-miR-147a	0	0	0	0	0	0	0	0	0	0	0	0	0	0	0	0	0	0	0	0	0	0	0	0	0	0	0	0	0	0	0	0	0	0	0	0	0	0	0	0	0	0	0	0	0	0	0	0	0
hsa-miR-147b	1	2	0	0	0	0	0	0	0	0	0	1	0	0	0	4	0	0	0	0	0	0	1	0	1	0	1	0	1	0	0	1	0	1	0	1	1	0	0	0	0	0	0	0	0	1	0	0	0
hsa-miR-148a-3p	22627	71197	21109	55207	24615	21459	22488	9713	37677	27221	28424	33046	36035	20510	41334	30789	10375	26308	67104	26735	45385	12269	42867	52042	36792	13636	20074	21709	18931	25621	12720	17717	60753	20013	9849	24611	20334	14956	6622	11272	27516	49318	46927	6907	20816	20359	25990	10470	2907
hsa-miR-148a-5p	37	48	22	33	17	33	18	6	19	22	26	29	26	4	24	23	7	34	39	28	40	12	63	53	49	13	31	20	23	23	13	19	39	25	14	29	18	13	8	14	33	40	56	15	15	20	14	11	8
hsa-miR-148b-3p	928	1422	535	1411	740	538	572	376	1137	690	744	791	616	698	899	824	366	478	927	812	512	363	791	589	863	342	654	349	751	481	301	405	1039	582	504	366	606	521	164	365	658	653	580	180	378	362	725	248	133
hsa-miR-148b-5p	11	6	5	5	6	1	1	2	16	8	6	6	2	1	5	4	5	4	4	10	6	3	4	6	5	3	3	10	3	1	0	3	3	5	3	2	3	12	0	0	4	5	1	0	1	2	6	0	0
hsa-miR-149-3p	0	0	0	0	0	0	0	0	0	0	0	0	0	0	0	0	0	0	0	0	0	0	0	0	0	0	0	0	0	0	0	0	0	0	0	0	0	0	0	0	0	0	0	0	0	0	0	0	0
hsa-miR-149-5p	0	0	0	0	0	0	0	0	0	0	0	0	0	0	0	0	0	0	0	0	0	0	0	0	0	1	0	0	0	0	0	0	0	0	0	0	0	0	0	0	0	0	0	0	0	0	0	0	0
hsa-miR-150-3p	368	10	66	10	18	38	16	114	91	31	19	16	42	18	25	39	4	21	24	78	44	25	18	43	55	91	22	80	21	13	5	14	16	41	19	24	21	89	22	67	21	34	34	14	12	41	20	30	26
hsa-miR-150-5p	91	10	38	7	20	47	22	66	12	29	26	44	55	6	65	30	4	52	33	37	14	25	36	31	55	65	28	106	28	7	16	49	4	72	16	49	38	99	18	63	28	18	16	24	12	98	29	53	36
hsa-miR-151a-3p	4997	6223	2208	3074	6052	7799	5708	3856	1413	4786	5887	6769	2598	1454	4706	5511	1697	2705	1691	3867	2081	4211	8319	3445	3815	1767	4194	2866	4157	2346	1601	2451	1324	3386	1898	3476	3419	4927	1761	3079	3533	989	4051	3024	4229	3677	2742	1344	2868
hsa-miR-151a-5p	7	7	5	5	7	9	7	8	7	8	4	11	6	1	13	16	4	4	5	7	2	7	8	6	6	4	3	2	5	5	1	6	3	2	4	6	2	4	0	3	4	2	2	1	3	4	3	1	5
hsa-miR-151b	0	1	0	0	0	0	0	0	0	0	0	1	0	0	0	0	0	0	0	0	0	0	0	0	0	0	0	0	1	0	0	0	0	0	0	0	0	0	0	0	0	0	0	0	0	0	0	0	0
hsa-miR-152-3p	158	146	125	62	157	203	92	82	137	132	135	311	137	21	198	144	9	154	136	87	131	47	67	61	143	66	83	34	53	54	45	137	95	30	91	79	57	23	40	50	95	32	57	25	79	78	55	37	39
hsa-miR-152-5p	1	0	0	0	0	0	0	0	0	0	0	0	0	0	0	0	0	0	0	0	0	0	0	0	1	0	0	0	0	0	0	0	0	0	0	0	0	0	0	0	0	0	0	0	0	1	0	0	0
hsa-miR-153-3p	0	0	0	0	0	0	0	0	0	0	0	0	0	0	0	0	0	0	0	0	0	0	0	0	0	0	0	0	0	0	0	0	0	0	0	0	0	0	0	0	0	0	0	0	0	0	0	0	0
hsa-miR-153-5p	0	0	0	0	0	0	0	0	0	0	0	0	0	0	0	0	0	0	0	0	0	0	0	0	0	0	0	0	0	0	0	0	0	0	0	0	0	0	0	0	0	0	0	0	0	0	0	0	0
hsa-miR-154-3p	0	0	0	0	0	0	0	0	0	0	0	0	0	0	0	0	0	0	0	0	0	0	0	0	0	0	0	0	0	0	0	0	0	0	0	0	0	0	0	0	0	0	0	0	0	0	0	0	0
hsa-miR-154-5p	1	0	0	0	0	0	0	0	0	0	0	0	0	0	1	0	0	0	0	0	0	0	0	0	0	0	0	0	0	0	0	0	0	0	0	0	0	0	0	0	0	0	0	0	0	0	0	0	1
hsa-miR-155-3p	0	0	0	0	0	0	0	0	0	0	0	0	0	0	0	0	0	0	0	0	0	0	0	0	0	0	0	0	0	0	0	0	0	0	0	0	0	0	0	0	0	0	0	0	0	0	0	0	0
hsa-miR-155-5p	107	65	104	28	65	151	49	151	49	90	108	118	91	21	97	84	27	117	107	108	135	73	71	68	109	106	37	53	42	56	16	78	46	20	59	38	45	44	30	42	78	28	45	24	31	73	26	34	67
hsa-miR-181a-2-3p	36	39	42	21	29	42	35	56	25	40	28	29	34	39	32	39	60	29	18	38	39	34	40	33	57	81	36	74	74	30	16	34	24	89	35	46	35	88	21	66	43	19	54	37	25	61	46	41	18
hsa-miR-181a-3p	8	5	9	4	1	4	5	17	8	6	4	9	3	4	5	0	7	7	4	6	8	2	9	7	8	5	3	6	3	5	1	5	4	5	6	5	4	7	1	3	7	5	4	3	6	6	6	4	3
hsa-miR-181a-5p	1636	1122	974	855	553	541	755	860	1268	931	730	887	764	572	682	766	619	1202	764	686	685	821	773	1129	950	762	442	799	719	680	241	372	911	872	833	1130	523	770	177	678	829	652	688	326	349	701	1232	671	235
hsa-miR-181b-3p	1	0	0	0	0	0	0	0	0	0	0	0	0	0	0	0	1	0	1	0	0	0	0	0	0	0	0	0	0	0	0	0	0	0	0	0	0	0	0	0	0	0	0	0	0	0	0	0	0
hsa-miR-181b-5p	244	148	255	99	85	79	100	205	187	143	89	165	135	54	107	188	40	191	294	132	228	79	92	137	165	209	70	79	67	112	40	85	150	81	143	169	73	75	37	71	112	82	94	30	59	98	141	86	43
hsa-miR-181c-3p	1	3	2	0	0	1	0	5	1	0	2	1	5	0	2	1	0	2	0	0	0	1	3	3	1	0	1	3	1	3	1	0	1	1	0	3	2	1	0	0	1	6	3	1	1	0	0	0	0
hsa-miR-181c-5p	2	2	0	0	0	0	0	0	1	0	0	2	0	0	1	1	0	0	1	0	1	0	0	1	1	0	0	0	0	0	0	0	0	0	0	0	1	0	0	0	1	0	0	0	0	1	0	0	0
hsa-miR-181d-3p	0	0	0	0	0	0	0	0	0	0	0	0	0	0	0	0	0	0	0	0	0	0	0	0	0	0	0	0	0	0	0	0	0	0	0	0	0	0	0	0	0	0	0	0	0	0	0	0	0
hsa-miR-181d-5p	41	34	16	18	26	21	17	34	18	30	29	36	21	2	26	50	4	27	41	17	19	15	12	31	29	51	14	11	9	31	4	10	39	9	25	26	7	5	8	10	22	26	20	2	16	24	9	12	10
hsa-miR-182-3p	0	0	1	0	0	0	1	0	0	0	0	0	0	0	0	0	2	0	0	1	0	0	0	0	0	0	0	0	0	0	0	0	0	0	0	0	0	2	0	0	0	0	0	0	0	0	0	0	0
hsa-miR-182-5p	736	740	474	514	150	144	357	244	1714	190	299	584	331	109	577	195	177	256	1076	921	937	222	131	430	222	369	273	878	409	386	289	667	251	436	298	88	411	4154	180	329	270	449	220	226	83	233	475	197	225
hsa-miR-183-3p	0	0	0	0	0	0	0	0	0	0	0	0	0	0	0	0	0	0	1	0	0	0	0	0	0	0	0	0	0	0	0	0	0	1	0	0	0	2	0	0	0	0	0	0	0	0	0	0	0
hsa-miR-183-5p	411	449	263	314	102	114	293	293	544	124	186	293	183	191	329	158	261	133	656	864	475	188	241	359	154	281	278	739	508	226	312	434	135	680	186	70	558	2999	116	281	275	198	150	338	79	318	456	228	176
hsa-miR-184	0	0	0	0	0	0	4	11	0	0	0	0	0	3	1	3	2	0	0	13	0	0	1	2	0	14	0	1	1	1	0	5	3	0	1	0	1	1	0	1	0	0	2	0	1	0	1	1	0
hsa-miR-185-3p	15	21	11	4	11	17	12	2	27	12	13	17	9	3	19	6	11	13	7	13	9	6	13	4	12	12	13	19	19	11	14	12	5	21	14	6	12	21	4	9	12	15	7	8	9	6	15	5	9
hsa-miR-185-5p	1774	4475	2659	709	1528	1763	1911	666	2640	1977	1568	2426	1657	282	2948	1711	465	1747	1751	2385	741	1136	795	366	1069	309	703	940	2002	809	1637	1127	1088	902	1304	277	502	760	240	341	866	2101	216	326	383	277	3694	107	401
hsa-miR-186-3p	0	0	0	0	0	0	0	0	0	0	0	0	0	0	0	0	0	0	0	0	0	0	0	0	0	0	0	0	0	0	0	0	0	0	0	0	0	0	0	0	0	0	0	0	0	0	0	0	0
hsa-miR-186-5p	541	476	211	164	116	137	168	130	633	108	153	169	113	126	324	154	99	175	149	387	140	142	448	278	417	147	378	518	1024	168	211	195	158	1030	204	187	437	995	67	215	463	594	241	257	138	288	804	97	95
hsa-miR-187-3p	0	0	0	0	0	0	0	0	0	0	0	0	0	0	0	0	0	0	0	0	1	0	0	0	0	0	0	1	0	0	0	0	0	0	0	0	0	0	0	0	1	0	0	0	0	0	0	0	0
hsa-miR-187-5p	0	0	0	0	0	0	0	0	0	0	0	0	0	0	0	0	0	0	0	0	0	0	0	0	0	1	0	0	0	0	0	0	0	0	0	0	0	0	0	0	0	0	0	0	0	0	0	0	0
hsa-miR-188-3p	0	0	0	0	0	0	0	0	0	0	0	0	0	0	0	0	0	0	0	0	0	0	0	0	0	0	0	0	0	0	0	0	0	0	0	0	0	0	0	0	0	0	0	0	0	0	0	0	0
hsa-miR-188-5p	3	1	1	0	0	1	1	0	1	0	0	0	2	0	0	4	0	2	0	0	0	1	1	2	1	0	1	1	0	1	0	2	0	0	2	1	0	0	0	2	0	0	0	0	0	0	1	0	0
hsa-miR-190a-3p	0	0	0	0	0	0	0	0	0	0	0	0	0	0	0	0	0	0	0	0	0	0	0	0	0	0	0	0	0	0	0	0	0	0	0	0	0	0	0	0	0	0	0	0	0	0	0	0	0
hsa-miR-190a-5p	0	0	1	0	0	0	0	0	2	0	0	0	0	0	0	0	0	0	0	0	0	0	0	0	0	0	0	1	0	0	0	0	0	0	0	0	0	2	0	0	0	0	0	0	0	0	0	0	0
hsa-miR-190b	1	3	0	0	1	5	1	0	3	1	1	2	4	1	1	0	0	2	1	0	0	0	1	5	7	0	4	3	7	6	1	3	2	2	2	1	1	1	1	1	6	10	4	2	2	3	2	0	0
hsa-miR-191-3p	2	2	1	2	2	10	1	2	0	3	3	2	3	0	1	2	0	4	3	3	1	1	5	2	6	1	2	5	2	3	0	1	0	5	1	1	1	0	0	2	4	1	5	2	3	2	0	0	7
hsa-miR-191-5p	505	1001	714	678	1242	1579	1011	677	825	1296	1252	1934	1226	422	1515	1094	446	1371	623	1105	797	1041	828	780	1476	770	694	1334	1026	1288	625	1022	805	1209	1115	1010	585	1573	477	791	1132	807	792	689	720	752	1008	410	916
hsa-miR-192-3p	0	0	0	0	0	0	0	0	0	0	0	0	0	0	0	0	0	0	0	0	0	0	0	0	0	0	0	0	0	0	0	0	0	0	0	0	0	0	0	0	0	0	0	0	0	0	0	0	0
hsa-miR-192-5p	700	891	467	546	250	232	556	330	1105	436	362	268	403	539	668	267	224	405	565	1133	1603	183	1131	320	567	283	704	520	1073	162	182	303	364	525	301	219	737	725	73	253	764	265	630	205	503	595	817	1671	61
hsa-miR-193a-3p	0	0	0	0	0	0	0	0	0	0	0	0	1	0	1	0	0	0	0	0	0	0	0	0	0	0	0	0	0	0	0	0	0	0	0	0	0	0	0	0	0	0	0	0	0	0	0	0	0
hsa-miR-193a-5p	56	183	71	34	41	82	57	86	18	65	81	96	96	12	170	43	67	174	130	65	149	65	79	73	127	117	65	89	82	118	24	111	73	85	49	97	57	26	23	32	103	130	149	32	52	87	71	42	61
hsa-miR-193b-3p	1	0	0	0	0	0	0	0	0	0	0	0	0	0	0	0	0	0	0	2	0	0	1	0	0	0	0	0	0	0	0	1	0	0	0	0	0	0	0	0	1	0	0	0	0	1	0	0	0
hsa-miR-193b-5p	5	3	5	3	1	2	2	73	0	2	3	2	2	3	6	10	6	2	6	7	67	1	10	2	6	23	10	7	11	5	3	9	7	6	3	5	10	2	2	3	19	0	43	1	10	14	22	10	1
hsa-miR-194-3p	0	0	0	1	0	0	0	0	0	0	0	1	0	0	0	0	0	0	0	0	0	0	0	0	0	0	0	0	0	1	0	0	0	0	0	0	0	0	0	0	0	0	0	0	0	1	0	2	0
hsa-miR-194-5p	209	188	95	117	46	45	153	59	248	83	90	64	64	159	133	59	234	79	104	186	128	98	297	72	97	69	159	110	202	20	67	38	64	176	66	46	153	164	9	71	188	97	121	75	94	106	326	279	10
hsa-miR-195-3p	4	3	0	2	1	2	3	11	0	3	10	3	3	0	2	2	0	3	11	13	6	4	6	4	3	7	2	7	4	1	0	4	0	4	1	1	8	5	2	3	7	0	4	3	2	21	2	2	0
hsa-miR-195-5p	3	2	1	1	1	1	0	2	0	2	0	2	1	0	2	1	0	1	5	2	3	1	3	0	2	0	0	0	0	0	0	0	0	0	2	0	1	1	0	0	0	0	0	0	0	1	0	0	0
hsa-miR-196a-3p	0	0	0	0	0	0	0	0	0	0	0	0	0	0	0	0	0	0	0	0	0	0	0	0	0	0	0	0	0	0	0	0	0	0	0	0	0	0	0	0	0	0	0	0	0	0	0	0	0
hsa-miR-196a-5p	0	0	0	0	0	1	0	0	0	0	0	0	0	0	0	1	0	1	68	2	2	0	1	0	0	0	0	0	0	0	0	0	0	0	0	0	0	0	0	0	0	0	1	0	0	0	0	23	1
hsa-miR-196b-3p	0	0	0	0	0	0	0	0	0	0	0	0	0	0	0	0	0	0	0	0	0	0	0	0	0	0	0	0	0	0	0	0	0	0	0	0	0	0	0	0	0	0	0	0	0	0	0	0	0
hsa-miR-196b-5p	11	13	4	6	3	6	5	2	17	9	9	8	7	2	15	12	2	8	14	10	12	7	8	6	12	3	6	5	15	4	3	8	6	9	5	3	5	10	1	6	7	8	4	1	3	3	12	3	2
hsa-miR-197-3p	5	18	4	5	13	26	18	10	1	12	11	14	21	5	13	10	2	27	5	5	0	19	14	12	31	8	13	35	18	22	10	7	4	16	4	7	18	8	8	10	20	11	18	18	12	37	9	7	14
hsa-miR-197-5p	0	0	0	0	0	0	0	0	0	0	0	0	0	5	0	0	4	0	0	0	0	0	0	0	1	0	0	0	0	0	0	0	0	3	0	1	0	0	0	1	0	0	0	0	0	0	0	2	0
hsa-miR-198	0	0	0	0	0	0	0	0	0	0	0	0	0	0	0	0	0	0	0	0	0	0	0	0	0	0	0	0	0	0	0	0	0	0	0	0	0	0	0	0	0	0	0	0	0	0	0	0	0
hsa-miR-199a-3p	197	178	50	91	151	129	94	41	196	163	186	290	125	28	177	124	13	275	204	117	114	76	150	128	176	79	93	56	52	130	36	84	149	41	87	58	72	46	30	37	126	163	87	29	72	75	70	22	27
hsa-miR-199a-5p	141	79	50	123	206	199	193	116	63	196	232	331	88	38	195	189	15	95	78	137	53	112	171	119	320	96	159	46	56	174	29	89	92	34	143	126	127	76	38	91	258	52	169	66	153	102	52	42	77
hsa-miR-199b-3p	159	143	38	76	124	101	83	34	184	136	143	223	115	24	134	97	11	224	167	93	79	71	127	118	130	60	75	45	34	107	32	64	146	36	75	51	64	35	20	28	105	126	67	21	45	69	55	24	22
hsa-miR-199b-5p	4	13	3	10	5	2	3	2	4	4	4	9	5	4	15	9	1	4	17	9	41	4	6	8	12	7	5	3	2	12	0	8	22	4	10	8	7	2	2	2	8	16	12	1	3	4	3	2	1
hsa-miR-200a-3p	23	37	2	2	4	19	26	175	6	13	8	29	9	1	34	98	8	9	132	16	9	6	435	22	33	32	76	26	17	2	4	205	23	16	5	16	47	35	1	11	388	6	23	16	26	54	19	69	1
hsa-miR-200a-5p	0	2	1	2	1	0	1	61	0	0	0	4	1	0	2	16	0	2	36	0	0	0	6	4	2	8	1	0	0	0	0	20	3	1	0	6	2	0	1	1	40	0	2	0	4	0	1	32	0
hsa-miR-200b-3p	16	26	5	8	6	9	5	124	11	5	11	72	7	0	46	148	1	4	595	15	14	2	34	32	19	31	5	15	4	6	3	454	45	5	5	13	31	3	8	13	927	4	20	3	38	5	17	579	4
hsa-miR-200b-5p	1	0	0	0	1	2	1	42	0	3	0	5	0	0	1	10	1	3	21	3	0	1	4	0	2	6	1	1	0	0	0	14	0	0	0	1	2	1	0	2	27	0	0	0	1	0	0	5	0
hsa-miR-200c-3p	10	41	6	9	8	21	11	78	4	13	8	50	7	0	38	239	0	13	235	9	7	8	11	18	12	20	9	20	5	7	2	773	163	5	8	24	74	7	12	13	637	3	16	2	18	7	11	132	14
hsa-miR-200c-5p	0	0	0	0	0	0	0	0	0	0	0	0	0	0	0	0	0	0	0	0	0	0	0	0	0	0	0	0	0	0	0	0	0	0	0	0	0	0	0	0	0	0	0	0	0	0	0	0	0
hsa-miR-202-3p	0	1	0	0	0	0	1	2	0	0	0	0	0	1	0	0	2	0	2	0	0	0	0	0	0	0	0	5	0	0	1	0	0	0	0	0	1	0	0	0	0	0	0	0	0	0	0	1	0
hsa-miR-202-5p	0	0	0	0	0	0	0	0	0	0	0	0	0	0	0	0	0	0	1	0	0	0	0	0	0	0	0	0	0	0	2	0	0	0	0	0	0	0	0	0	0	0	0	0	0	0	1	0	0
hsa-miR-203a	32	61	27	20	22	28	29	61	32	73	61	59	90	75	32	66	45	10	191	97	263	4	14	28	65	27	17	48	36	34	7	74	85	5	39	141	87	21	31	27	73	18	23	7	8	38	13	51	10
hsa-miR-203b-3p	0	0	0	0	0	0	0	1	0	0	0	0	0	0	0	0	0	0	0	0	1	0	0	0	0	0	0	0	0	0	0	1	0	0	0	0	0	0	0	0	0	0	0	0	0	0	0	0	0
hsa-miR-203b-5p	0	0	0	0	0	0	0	0	0	0	0	0	0	0	0	0	0	0	0	0	0	0	0	0	0	0	0	0	0	0	0	0	0	0	0	0	0	0	0	0	0	0	0	0	0	0	0	0	0
hsa-miR-204-3p	0	0	0	1	0	1	2	6	0	1	0	0	0	1	0	3	0	0	0	2	0	1	0	4	2	6	0	1	0	0	0	0	0	1	0	3	0	0	0	0	0	0	0	0	0	3	1	1	1
hsa-miR-204-5p	4	1	2	1	3	9	0	14	0	3	2	5	2	1	5	5	0	7	1	6	1	2	1	0	1	6	0	4	0	1	0	8	0	0	3	3	3	0	2	3	3	0	5	2	2	5	1	3	1
hsa-miR-205-3p	0	0	0	0	0	0	0	0	0	0	0	0	0	0	0	0	0	0	0	0	0	0	0	0	0	0	0	0	0	0	0	0	0	0	0	0	0	0	0	0	0	0	0	0	0	0	0	0	0
hsa-miR-205-5p	0	1	0	0	0	0	0	0	0	0	0	0	0	0	6	4	0	0	6	1	0	0	1	0	1	1	0	1	0	0	0	0	2	0	0	0	3	0	0	0	5	0	1	0	0	0	0	0	0
hsa-miR-206	6	5	4	1	2	7	10	8	0	2	1	2	13	4	2	13	0	7	7	15	32	10	12	17	9	32	14	27	14	4	2	10	8	11	12	7	12	12	2	4	6	4	17	3	8	45	8	2	2
hsa-miR-208a-3p	0	0	0	0	0	0	0	0	0	0	0	0	0	0	0	0	0	0	0	0	0	0	0	0	0	0	0	0	0	0	0	0	0	0	0	0	0	0	0	0	0	0	0	0	0	0	0	0	0
hsa-miR-208a-5p	0	0	0	0	0	0	0	0	0	0	0	0	0	0	0	0	0	0	0	0	0	0	0	0	0	0	0	0	0	0	0	0	0	0	0	0	0	0	0	0	0	0	0	0	0	0	0	0	0
hsa-miR-208b-3p	0	0	0	0	0	0	0	0	0	0	0	0	0	0	0	2	0	0	0	0	0	0	0	1	0	0	0	0	0	0	0	0	0	0	0	0	0	0	0	0	0	0	0	0	0	0	0	0	0
hsa-miR-208b-5p	0	0	0	0	0	0	0	0	0	0	0	0	0	0	0	0	0	0	0	0	0	0	0	0	0	0	0	0	0	0	0	0	0	0	0	0	0	0	0	0	0	0	0	0	0	0	0	0	0
hsa-miR-210-3p	14	8	7	6	6	3	6	11	9	4	4	6	2	10	4	12	27	3	18	7	3	4	7	5	5	6	11	13	15	0	3	6	1	22	6	2	11	12	0	1	14	4	5	5	2	4	15	3	1
hsa-miR-210-5p	0	0	0	0	0	0	0	0	0	0	0	0	0	0	0	0	0	0	0	0	0	0	0	0	0	0	0	0	0	0	0	0	0	0	0	0	0	0	0	0	0	0	0	0	0	0	0	0	0
hsa-miR-211-3p	0	0	0	0	0	0	0	0	0	0	0	0	0	0	0	0	0	0	0	0	0	0	0	0	0	0	0	0	0	0	0	0	0	0	0	0	0	0	0	0	0	0	0	0	0	0	0	0	0
hsa-miR-211-5p	0	0	0	0	0	2	0	0	0	0	0	0	0	0	0	0	0	0	0	0	0	0	0	0	0	0	0	0	0	0	0	0	0	0	0	0	0	0	0	0	0	0	0	0	0	0	0	0	0
hsa-miR-212-3p	0	0	0	0	0	0	0	0	0	0	0	0	0	0	0	0	0	0	0	0	0	0	0	0	0	0	0	0	0	0	0	0	0	0	0	0	0	0	0	0	0	0	0	0	0	0	0	0	0
hsa-miR-212-5p	0	0	0	0	0	0	0	0	0	0	2	0	0	0	1	1	0	1	1	1	1	0	1	1	2	0	1	0	1	1	0	1	0	0	0	0	1	1	0	0	0	0	2	0	0	0	0	1	0
hsa-miR-214-3p	1	0	1	0	1	0	0	0	0	0	1	0	1	0	0	1	2	1	2	5	5	1	2	1	0	1	0	3	1	0	0	0	0	1	0	3	2	0	0	0	0	0	0	1	0	4	1	0	0
hsa-miR-214-5p	1	0	0	0	0	0	0	0	0	0	0	0	1	0	0	1	4	1	0	1	0	0	2	0	1	1	1	0	1	0	0	0	0	0	0	0	1	0	0	0	0	0	0	0	0	1	0	1	0
hsa-miR-215-3p	0	0	0	0	0	0	0	0	0	0	0	0	0	0	0	0	0	0	0	0	0	0	0	0	0	0	0	0	0	0	0	0	0	0	0	0	0	0	0	0	0	0	0	0	0	0	0	0	0
hsa-miR-215-5p	48	49	44	24	49	55	116	156	26	167	32	20	135	22	25	62	12	114	28	51	46	20	69	86	151	143	106	43	43	19	17	30	53	20	49	70	135	90	26	24	63	21	17	14	84	89	339	247	4
hsa-miR-216a-3p	0	0	0	0	0	0	0	0	0	0	0	0	0	0	0	0	0	0	0	0	0	0	0	0	0	0	0	0	0	0	0	0	0	0	0	0	0	0	0	0	0	0	0	0	0	0	0	0	0
hsa-miR-216a-5p	0	0	0	0	0	0	0	0	0	0	0	0	0	0	0	0	1	0	0	0	0	0	0	0	0	0	0	0	0	0	0	0	0	0	0	0	0	0	0	0	0	0	0	0	0	0	0	0	0
hsa-miR-216b-3p	0	0	0	0	0	0	0	0	0	0	0	0	0	0	0	0	0	0	0	0	0	0	0	0	0	0	0	0	0	0	0	0	0	0	0	0	0	0	0	0	0	0	0	0	0	0	0	0	0
hsa-miR-216b-5p	0	0	0	0	0	0	0	0	0	1	0	0	0	0	0	0	0	0	0	0	0	0	3	2	0	0	1	0	1	0	0	0	0	0	0	0	0	0	0	0	1	0	0	0	0	0	0	0	0
hsa-miR-217	0	0	0	0	0	0	0	0	0	0	0	0	0	0	0	0	0	0	0	0	0	1	0	0	0	0	1	0	1	0	0	0	0	1	0	0	0	0	0	0	0	0	0	0	0	0	0	0	0
hsa-miR-218-1-3p	0	0	0	0	0	0	0	0	0	0	0	0	0	0	0	0	0	0	0	0	0	0	0	0	0	0	0	0	0	0	0	0	0	0	0	0	0	0	0	0	0	0	0	0	0	0	0	0	0
hsa-miR-218-2-3p	0	0	0	0	0	0	0	0	0	0	0	0	0	0	0	0	0	0	0	0	0	0	0	0	0	0	0	0	0	0	0	0	0	0	0	0	0	0	0	0	0	0	0	0	0	0	0	0	0
hsa-miR-218-5p	0	2	2	1	1	1	1	2	1	1	1	1	2	1	1	2	0	2	2	3	5	2	2	4	2	2	0	1	60	1	0	2	2	1	1	0	1	0	0	2	4	2	2	0	0	3	2	9	0
hsa-miR-219a-1-3p	2	3	1	1	2	1	3	3	0	0	1	2	0	6	0	1	1	1	4	0	0	1	3	0	0	0	3	1	2	1	1	1	0	3	0	0	2	3	0	2	2	1	0	2	1	2	1	2	0
hsa-miR-219a-2-3p	0	0	0	0	0	0	0	0	0	0	0	0	0	0	0	0	0	1	0	0	0	0	0	0	0	0	0	0	0	0	0	0	0	0	0	0	0	0	0	0	0	0	0	0	0	0	0	0	0
hsa-miR-219a-5p	0	0	0	0	0	0	0	0	0	0	0	0	0	0	0	0	0	0	0	0	0	0	0	0	0	0	0	0	0	0	0	0	0	0	0	0	0	0	0	0	0	0	0	0	0	0	0	0	0
hsa-miR-219b-3p	0	0	0	0	0	0	0	0	0	0	0	0	0	0	0	0	0	0	0	0	0	0	0	0	0	0	0	0	0	0	0	0	0	0	0	0	0	0	0	0	0	0	0	0	0	0	0	0	0
hsa-miR-219b-5p	0	0	0	0	0	0	0	0	0	0	0	0	0	0	0	0	0	0	0	0	0	0	0	0	0	0	0	0	0	0	0	0	0	0	0	0	0	0	0	0	0	0	0	0	0	0	0	0	0
hsa-miR-221-3p	577	268	188	133	249	348	187	178	354	264	360	402	205	78	345	393	86	433	283	260	225	164	333	257	285	349	194	140	161	239	117	328	200	121	268	227	151	170	106	171	255	187	198	91	141	121	170	94	162
hsa-miR-221-5p	11	6	2	3	9	5	4	9	4	4	6	9	6	2	10	8	0	6	8	6	0	7	14	11	13	4	7	11	10	5	3	5	7	14	6	7	9	7	2	3	11	9	14	5	6	8	6	4	0
hsa-miR-222-3p	435	204	118	103	102	137	134	91	171	160	122	129	150	133	160	265	193	200	193	236	210	130	239	224	216	236	138	183	176	182	93	128	143	221	111	186	148	173	58	177	210	149	136	86	74	163	161	83	78
hsa-miR-222-5p	0	0	0	0	0	0	0	0	0	0	1	0	0	0	0	0	0	0	0	0	0	0	0	0	0	0	0	0	0	1	0	0	0	0	0	0	0	0	0	0	0	0	0	0	0	0	0	0	0
hsa-miR-223-3p	44	175	16	104	44	49	42	18	62	44	67	111	68	9	155	40	5	106	69	26	85	61	148	87	191	27	88	98	59	183	44	45	145	109	60	118	49	60	24	40	86	512	177	60	69	73	65	45	22
hsa-miR-223-5p	784	2407	501	903	902	1228	721	476	486	869	1016	1135	1238	152	1654	813	188	1338	1045	514	1061	958	1243	2093	2292	526	845	1369	883	2071	348	746	1335	1336	639	1579	913	578	564	521	1391	2623	2557	552	1075	1926	746	337	568
hsa-miR-224-3p	0	0	0	0	0	0	0	0	0	0	0	0	0	0	0	0	0	0	0	0	0	0	0	0	0	0	0	0	0	0	0	0	0	0	0	0	0	0	0	0	0	0	0	0	0	0	0	0	0
hsa-miR-224-5p	12	17	10	8	37	26	15	36	6	7	33	57	25	3	30	72	2	17	7	13	14	18	41	23	27	10	30	17	15	23	16	10	13	6	19	19	16	12	6	14	60	4	41	20	52	16	7	19	46
hsa-miR-296-3p	2	0	1	1	0	2	0	6	0	0	0	1	1	0	0	0	0	0	7	3	0	1	3	0	0	2	0	0	0	0	1	2	0	0	0	4	1	0	0	0	0	0	3	0	0	1	0	1	0
hsa-miR-296-5p	0	0	0	0	0	0	0	0	0	0	0	0	0	0	0	0	2	0	0	0	1	0	0	0	0	0	0	0	1	0	1	0	0	1	0	0	1	0	0	0	0	0	0	0	0	0	0	0	0
hsa-miR-297	0	0	0	0	0	0	0	0	0	0	0	0	0	0	0	0	0	0	0	0	0	0	0	0	0	0	0	0	0	0	0	0	0	0	0	0	0	0	0	0	0	0	0	0	0	0	0	0	0
hsa-miR-298	0	0	0	0	0	0	0	0	0	0	0	0	0	0	0	0	0	0	0	0	0	0	0	0	0	0	0	0	0	0	0	0	0	0	0	0	0	0	0	0	0	0	0	0	0	0	0	0	0
hsa-miR-299-3p	0	0	0	0	0	0	0	0	0	0	1	0	0	0	0	0	0	1	0	0	0	0	0	0	0	0	0	0	0	0	0	0	0	0	0	0	0	0	0	0	0	0	0	0	0	0	0	0	0
hsa-miR-299-5p	0	0	0	0	0	0	0	0	0	0	0	0	0	0	0	0	0	0	0	0	0	0	0	0	0	0	0	0	0	0	0	0	0	0	0	0	0	0	0	0	0	0	0	0	0	0	0	0	0
hsa-miR-300	0	0	0	0	0	0	0	0	0	0	0	0	0	0	0	0	0	0	0	0	0	0	0	0	0	0	0	0	0	0	0	0	0	0	0	0	0	0	0	0	0	0	0	0	0	0	0	0	0
hsa-miR-301a-3p	0	0	0	0	0	0	0	0	0	0	0	0	0	0	0	0	0	0	0	0	0	0	0	0	0	0	0	0	0	0	0	0	0	0	0	0	0	0	0	0	0	0	0	0	0	0	0	0	0
hsa-miR-301a-5p	0	0	1	1	2	0	0	0	2	4	1	2	2	0	1	2	0	1	1	5	2	0	1	0	5	0	0	1	0	1	0	1	0	1	0	0	1	1	0	1	1	0	0	0	0	0	0	0	0
hsa-miR-301b	0	0	0	0	0	0	0	0	0	0	1	0	0	0	0	1	0	0	0	0	0	0	0	0	0	0	0	0	0	0	0	0	0	0	0	0	0	0	0	0	0	0	0	0	0	0	0	0	0
hsa-miR-302a-3p	0	0	0	0	0	0	0	0	0	0	0	0	0	0	0	0	0	0	0	0	0	0	0	0	0	0	0	0	0	0	0	0	0	0	0	0	0	0	0	0	0	0	0	0	0	0	0	0	0
hsa-miR-302a-5p	0	0	0	0	0	0	0	0	0	0	0	0	0	0	0	0	0	0	0	0	0	0	0	0	0	0	0	0	0	0	0	0	0	0	0	0	0	0	0	0	0	0	0	0	0	0	0	0	0
hsa-miR-302b-3p	0	0	0	0	0	0	0	0	0	0	0	0	0	0	0	0	0	0	0	0	0	0	0	0	0	0	0	0	0	0	0	0	0	0	0	0	0	0	0	0	0	0	0	0	0	0	0	0	0
hsa-miR-302b-5p	0	0	0	0	0	0	0	0	0	0	0	0	0	0	0	0	0	0	0	0	0	0	0	0	0	0	0	0	0	0	0	0	0	0	0	0	0	0	0	0	0	0	0	0	0	0	0	0	0
hsa-miR-302c-3p	0	0	0	0	0	0	0	0	0	0	0	0	0	0	0	0	0	0	0	0	0	0	0	0	0	0	0	0	0	0	0	0	0	0	0	0	0	0	0	0	0	0	0	0	0	0	0	0	0
hsa-miR-302c-5p	0	0	0	0	0	0	0	0	0	0	0	0	0	0	0	0	0	0	0	0	0	0	0	0	0	0	0	0	0	0	0	0	0	0	0	0	0	0	0	0	0	0	0	0	0	0	0	0	0
hsa-miR-302d-3p	0	0	0	0	0	0	0	0	0	0	0	0	0	0	0	0	0	0	0	0	0	0	0	0	0	0	0	0	0	0	0	0	0	0	0	0	0	0	0	0	0	0	0	0	0	0	0	0	0
hsa-miR-302d-5p	0	0	0	0	0	0	0	0	0	0	0	0	0	0	0	0	0	0	0	0	0	0	0	0	0	0	0	0	0	0	0	0	0	0	0	0	0	0	0	0	0	0	0	0	0	0	0	0	0
hsa-miR-302e	0	0	0	0	0	0	0	0	0	0	0	0	0	0	0	0	0	0	0	0	0	0	0	0	0	0	0	0	0	0	0	0	0	0	0	0	0	0	0	0	0	0	0	0	0	0	0	0	0
hsa-miR-302f	0	0	0	0	0	0	0	0	0	0	0	0	0	0	0	0	0	0	0	0	0	0	0	0	0	0	0	0	0	0	0	0	0	0	0	0	0	0	0	0	0	0	0	0	0	0	0	0	0
hsa-miR-320a	10725	7123	18368	8321	7580	7415	11685	23284	3722	10148	8045	5189	11128	9325	5242	11555	22706	5095	10065	18100	20348	7864	6073	7088	5748	13990	4626	5939	10422	7150	7382	5570	10263	8436	21117	8748	3373	4295	3424	10151	6829	4954	3395	4533	2299	3549	15283	8768	7902
hsa-miR-320b	446	255	697	380	212	239	460	3118	152	363	323	189	433	616	231	710	1497	238	2193	1159	1180	363	325	463	301	2892	273	419	566	290	261	517	456	525	927	581	273	279	158	597	502	249	291	238	143	313	977	618	321
hsa-miR-320c	86	47	136	86	46	46	76	1059	25	66	59	34	80	171	47	183	325	53	1006	301	269	55	74	125	72	1147	57	94	90	62	39	148	97	83	139	149	70	47	37	105	137	38	80	34	38	96	165	121	70
hsa-miR-320d	50	19	68	31	25	18	24	449	14	29	25	19	33	43	19	87	63	13	252	89	129	21	20	36	31	284	17	37	28	34	11	39	45	19	42	58	22	14	16	27	39	16	30	10	20	37	37	28	33
hsa-miR-320e	2	1	4	3	1	2	1	29	0	3	1	1	2	3	2	4	7	1	45	9	6	2	2	1	2	16	0	1	3	0	1	3	2	1	3	2	1	1	0	3	2	0	1	0	0	1	4	3	2
hsa-miR-323a-3p	22	10	3	7	12	15	12	16	1	2	33	3	8	20	13	8	0	34	15	4	17	6	17	13	33	8	24	14	11	12	3	4	2	8	32	6	9	9	19	25	20	0	9	5	6	12	15	3	56
hsa-miR-323a-5p	0	0	0	0	0	0	0	1	0	0	1	0	0	0	0	0	0	0	0	0	0	0	0	0	0	0	0	0	0	0	0	0	0	0	0	0	0	0	0	0	0	0	0	0	0	0	0	0	1
hsa-miR-323b-3p	42	4	16	9	30	44	16	55	5	14	36	18	16	55	34	6	7	66	16	6	36	5	12	28	53	13	42	30	15	36	10	10	7	12	88	9	24	19	45	115	13	2	17	4	17	22	8	5	90
hsa-miR-323b-5p	0	0	0	0	0	0	0	0	0	0	0	0	0	0	0	0	0	0	0	0	0	0	0	0	0	0	0	0	0	0	0	0	0	0	0	0	0	0	0	0	0	0	0	0	0	0	0	0	0
hsa-miR-324-3p	3	0	0	0	1	2	2	2	4	0	1	2	1	0	1	1	1	1	0	2	0	1	2	2	2	0	1	3	3	1	0	0	1	3	1	1	0	6	0	0	2	4	0	2	0	1	3	0	0
hsa-miR-324-5p	1	0	1	0	0	2	0	0	2	0	0	0	0	0	0	0	0	0	0	0	0	0	0	0	0	0	0	1	1	0	0	0	0	1	0	0	0	4	0	0	0	1	0	1	1	0	0	0	0
hsa-miR-325	0	0	0	0	0	0	0	0	0	0	0	0	0	0	0	0	0	0	0	0	0	0	0	0	0	0	0	0	0	0	0	0	0	0	0	0	0	0	0	0	0	0	0	0	0	0	0	0	0
hsa-miR-326	15	5	2	14	10	13	6	9	1	9	9	7	3	4	8	10	2	8	3	7	2	7	25	12	8	8	10	5	5	9	4	5	7	5	6	11	4	4	5	14	10	5	12	5	4	8	1	8	4
hsa-miR-328-3p	11	46	38	11	199	368	140	184	5	136	153	181	67	91	75	158	160	255	46	58	10	108	63	69	76	61	69	56	50	38	48	77	11	41	58	25	53	27	96	42	93	11	27	70	72	109	33	24	274
hsa-miR-328-5p	0	0	0	0	0	0	0	0	0	0	0	0	0	0	0	0	0	0	0	0	0	0	0	0	0	0	0	0	0	0	0	0	0	0	0	0	0	0	0	0	0	0	0	0	0	0	0	0	0
hsa-miR-329-3p	2	0	0	1	0	2	2	4	0	0	4	0	0	0	2	0	0	5	0	0	1	1	2	4	8	0	1	1	0	2	0	0	0	1	4	0	2	1	1	0	3	0	1	0	2	0	0	1	1
hsa-miR-329-5p	0	0	0	0	0	0	0	0	0	0	1	0	0	0	0	0	0	0	0	0	0	0	0	0	1	0	0	0	0	0	0	0	0	0	0	0	0	0	0	0	0	0	0	0	0	0	0	0	0
hsa-miR-330-3p	44	43	29	30	76	111	40	75	15	79	47	99	42	26	59	58	5	57	48	36	34	49	64	44	65	27	32	30	21	51	12	27	25	18	32	46	16	14	20	27	60	16	47	28	38	43	12	15	59
hsa-miR-330-5p	11	7	5	2	2	6	7	7	3	4	3	6	4	8	3	4	1	5	6	6	6	4	5	4	5	3	3	5	2	2	2	2	2	5	3	6	1	4	1	3	4	4	2	1	2	2	2	1	1
hsa-miR-331-3p	0	1	0	0	2	2	0	1	0	1	1	5	0	0	1	0	0	1	1	0	2	1	2	1	2	2	0	1	1	1	0	1	0	1	1	0	1	2	0	0	1	0	2	0	2	2	0	0	1
hsa-miR-331-5p	8	7	14	3	5	5	6	6	20	6	5	5	9	3	5	6	14	8	9	12	3	2	6	4	3	4	3	3	6	2	4	4	5	6	14	2	2	3	0	7	4	3	2	1	1	2	7	3	2
hsa-miR-335-3p	15	14	12	13	52	73	56	29	2	58	64	57	20	15	35	42	12	26	6	26	14	23	25	23	57	22	13	18	12	28	7	21	3	5	17	13	18	10	15	30	33	1	45	19	46	36	10	4	40
hsa-miR-335-5p	37	38	37	21	42	33	19	25	74	43	41	64	39	19	55	51	31	43	111	30	48	11	24	15	24	50	15	5	9	15	9	46	54	10	47	16	13	10	8	12	19	16	15	3	14	4	53	9	7
hsa-miR-337-3p	0	1	0	0	1	4	0	0	0	0	7	0	0	0	0	0	0	2	1	0	0	0	2	0	3	0	0	1	0	1	0	0	0	0	1	0	0	0	1	7	1	0	0	0	1	2	0	0	1
hsa-miR-337-5p	0	0	0	1	1	0	0	0	0	0	1	0	0	0	0	0	0	0	0	0	2	0	1	1	1	0	0	0	0	0	0	0	0	0	0	0	0	0	0	1	0	0	0	0	0	0	0	0	0
hsa-miR-338-3p	0	0	0	0	0	0	0	0	0	0	0	0	0	0	0	0	1	0	1	0	1	0	0	0	0	1	0	0	0	1	0	1	0	0	0	0	0	0	0	0	0	0	0	0	0	0	0	0	0
hsa-miR-338-5p	35	54	27	42	50	52	17	37	19	72	54	80	75	7	98	45	0	128	156	43	131	43	28	94	79	65	23	46	21	146	22	65	85	32	49	68	35	14	28	28	52	105	75	18	28	48	39	20	50
hsa-miR-339-3p	83	20	28	34	28	33	35	12	37	29	24	17	35	55	24	26	46	24	26	45	15	17	36	36	21	11	23	31	37	24	49	18	17	48	17	37	24	27	8	24	27	16	17	19	10	12	55	15	17
hsa-miR-339-5p	12	3	1	4	11	10	4	9	1	5	2	6	5	1	8	4	3	7	8	7	2	4	6	4	11	2	6	7	4	6	2	5	1	7	4	7	4	6	1	3	10	2	9	3	4	5	4	2	7
hsa-miR-340-3p	11	14	16	17	24	48	26	35	9	30	31	46	25	8	41	41	3	22	27	30	18	26	14	30	36	9	11	8	11	17	2	18	9	4	13	17	8	12	6	10	28	3	22	5	14	15	5	8	15
hsa-miR-340-5p	129	300	144	228	145	139	143	72	358	212	275	305	219	125	354	353	21	213	376	196	190	102	247	194	494	116	207	85	159	170	49	208	410	57	286	117	161	97	39	83	281	188	176	40	135	110	256	78	26
hsa-miR-342-3p	63	6	13	2	6	18	6	10	16	8	3	11	21	1	12	6	2	11	7	4	5	9	13	4	21	9	10	21	8	8	3	8	6	12	3	8	7	19	2	12	12	7	6	4	6	15	6	4	7
hsa-miR-342-5p	792	43	165	65	49	76	66	153	128	79	53	35	111	24	54	82	108	33	40	138	57	74	87	87	121	117	63	134	88	47	29	32	51	139	31	166	60	154	23	177	75	85	56	35	35	94	96	60	36
hsa-miR-345-3p	0	0	0	0	0	0	0	0	0	0	0	0	0	0	0	0	0	0	0	0	0	0	0	0	0	0	0	0	0	0	0	0	0	0	0	0	0	0	0	0	0	0	0	0	0	0	0	0	0
hsa-miR-345-5p	27	24	17	9	13	14	20	23	13	13	13	8	16	16	17	6	20	27	17	13	6	14	29	30	21	8	17	20	28	28	12	13	10	31	15	22	18	22	5	14	21	26	21	11	9	13	30	7	10
hsa-miR-346	0	0	0	0	0	0	0	0	0	0	0	0	0	0	0	0	0	0	0	0	0	0	0	0	0	0	0	0	0	0	0	0	0	0	0	0	0	0	0	0	0	0	0	0	0	0	0	0	0
hsa-miR-361-3p	880	289	270	167	229	234	198	229	179	202	230	306	183	104	295	232	159	199	180	390	285	206	420	247	357	260	233	384	315	179	93	156	85	450	128	315	190	391	80	248	261	178	316	181	154	279	223	180	153
hsa-miR-361-5p	39	26	24	19	36	28	17	45	27	32	23	30	37	13	33	30	11	70	74	38	26	26	17	33	25	38	13	22	17	35	11	29	28	15	30	30	19	11	9	21	18	36	19	7	8	30	25	17	9
hsa-miR-362-3p	0	0	0	0	0	0	0	0	0	0	0	0	0	0	0	0	0	0	0	0	0	0	0	0	0	0	0	0	0	0	0	0	0	0	0	1	0	0	0	0	0	0	0	0	0	0	0	0	0
hsa-miR-362-5p	1	0	0	0	0	0	0	0	3	1	0	0	0	0	1	0	0	0	0	0	0	0	0	1	0	0	0	0	0	0	0	1	0	0	0	1	0	0	0	0	2	0	0	0	0	0	0	0	0
hsa-miR-363-3p	827	561	548	590	196	195	469	190	1435	223	276	267	293	494	671	369	610	271	490	1157	254	253	400	449	184	292	292	743	766	170	251	234	206	1110	316	198	341	1417	58	390	359	307	189	260	75	263	733	178	66
hsa-miR-363-5p	1	1	4	1	0	1	4	0	0	1	1	0	4	2	0	1	16	0	1	2	0	1	4	0	2	0	5	8	8	0	3	0	0	15	2	0	2	10	0	5	5	1	1	4	1	4	5	1	1
hsa-miR-365a-3p	0	0	0	0	0	0	0	0	0	0	0	0	0	0	0	0	0	0	0	0	0	0	0	0	0	0	0	0	0	0	0	0	0	0	0	0	0	0	0	0	0	0	0	0	0	0	0	0	0
hsa-miR-365a-5p	0	0	0	0	0	0	0	0	0	0	0	0	0	0	0	0	0	0	0	0	0	0	2	0	0	0	0	1	0	0	0	0	0	0	0	1	0	0	0	0	0	0	0	0	0	1	0	0	0
hsa-miR-365b-3p	0	0	0	0	0	0	0	0	0	0	0	0	0	0	0	0	0	0	0	0	0	0	0	0	0	0	0	0	0	0	0	0	0	0	0	0	0	0	0	0	0	0	0	0	0	0	0	0	0
hsa-miR-365b-5p	0	0	0	0	0	0	0	1	0	0	0	0	0	0	0	0	0	0	0	2	2	0	1	0	0	3	0	0	0	0	0	0	1	1	0	0	0	0	0	0	2	0	0	0	0	0	1	0	1
hsa-miR-367-3p	0	0	0	0	0	0	0	0	0	0	0	0	0	0	0	0	0	0	0	0	0	0	0	0	0	0	0	0	0	0	0	0	0	0	0	0	0	0	0	0	0	0	0	0	0	0	0	0	0
hsa-miR-367-5p	0	0	0	0	0	0	0	0	0	0	0	0	0	0	0	0	0	0	0	0	0	0	0	0	0	0	0	0	0	0	0	0	0	0	0	0	0	0	0	0	0	0	0	0	0	0	0	0	0
hsa-miR-369-3p	1	0	0	1	1	1	0	0	0	0	6	0	0	0	1	1	0	3	1	4	2	1	0	1	1	0	0	0	0	0	0	0	2	0	3	0	1	0	0	2	2	0	0	0	0	0	0	0	0
hsa-miR-369-5p	0	1	0	1	1	1	1	3	0	0	3	0	0	0	1	0	0	2	0	0	1	0	3	0	9	0	2	0	1	2	0	0	0	0	1	1	2	0	1	5	2	0	1	1	1	1	0	0	1
hsa-miR-370-3p	57	33	19	49	47	132	39	130	6	28	174	50	44	14	124	22	6	96	39	14	71	26	49	48	214	10	70	56	24	83	5	11	25	11	53	34	52	28	31	69	86	5	41	12	40	38	26	11	96
hsa-miR-370-5p	0	0	0	0	0	0	0	0	0	0	0	0	0	0	0	0	0	0	0	0	0	0	0	0	1	0	0	0	0	0	0	0	0	0	0	0	0	0	0	0	0	0	0	0	0	0	0	0	0
hsa-miR-371a-3p	0	0	0	0	0	0	0	0	0	0	0	0	0	0	0	0	0	0	0	0	0	0	0	0	0	0	0	0	0	0	0	0	0	0	0	0	0	0	0	0	0	0	0	0	0	0	0	0	0
hsa-miR-371a-5p	0	0	0	0	0	0	0	0	0	0	0	0	0	0	0	0	0	0	0	0	0	0	0	0	0	0	0	0	0	0	0	0	0	0	0	0	0	0	0	0	0	0	0	0	0	0	0	0	0
hsa-miR-371b-3p	0	0	0	0	0	0	0	0	0	0	0	0	0	0	0	0	0	0	0	0	0	0	0	0	0	0	0	1	0	0	0	0	0	0	0	0	0	0	0	0	0	0	0	0	0	0	0	0	0
hsa-miR-371b-5p	0	2	0	0	2	0	0	0	0	0	1	0	1	0	1	1	0	3	2	1	0	1	0	3	2	0	1	0	0	2	0	0	2	1	1	1	1	0	0	0	0	2	1	1	2	1	0	0	0
hsa-miR-372-3p	0	0	0	0	0	0	0	1	0	0	2	0	1	0	0	0	0	0	0	0	0	0	0	0	0	0	0	0	0	0	0	0	0	0	0	0	0	0	0	1	0	0	0	0	1	0	0	0	0
hsa-miR-372-5p	0	0	0	0	0	0	0	0	0	0	0	0	0	0	0	0	0	0	0	0	0	0	0	0	0	0	0	0	0	0	0	0	0	0	0	0	0	0	0	0	0	0	0	0	0	0	0	0	0
hsa-miR-373-3p	0	0	0	0	0	0	0	0	0	0	0	0	0	0	0	0	0	0	0	0	0	0	0	0	0	0	0	0	0	0	0	0	0	0	0	0	0	0	0	0	0	0	0	0	0	0	0	0	0
hsa-miR-373-5p	0	0	0	0	0	0	0	0	0	0	0	0	0	0	0	0	0	0	0	0	0	0	0	0	0	0	0	0	0	0	0	0	0	0	0	0	0	0	0	0	0	0	0	0	0	0	0	0	0
hsa-miR-374a-3p	6	10	5	15	11	4	5	11	41	5	9	12	7	7	17	12	1	9	15	27	17	0	5	5	17	11	6	10	5	7	0	12	10	2	9	0	5	30	0	9	11	5	2	0	6	7	6	2	1
hsa-miR-374a-5p	34	17	18	26	17	14	11	4	107	11	20	33	18	5	29	21	5	12	44	56	41	6	20	18	22	11	14	30	13	12	2	23	11	13	18	6	13	72	2	9	25	27	11	4	8	13	26	5	2
hsa-miR-374b-3p	0	0	0	0	1	0	0	3	0	0	0	1	0	0	2	0	0	0	1	0	0	0	0	0	0	0	0	0	0	2	0	1	0	0	2	0	0	0	0	1	0	0	1	0	0	0	0	0	0
hsa-miR-374b-5p	23	7	6	13	2	2	3	1	23	5	8	14	2	1	21	6	0	7	9	10	6	5	10	6	19	4	6	7	5	4	1	5	12	4	8	7	4	20	1	5	11	11	4	2	5	7	8	3	2
hsa-miR-374c-3p	0	0	0	0	0	0	0	0	0	0	0	0	0	0	0	0	0	0	0	0	0	0	0	0	0	0	0	0	0	0	0	0	0	0	0	0	0	0	0	0	0	0	0	0	0	0	0	0	0
hsa-miR-374c-5p	0	0	0	0	0	0	0	0	0	0	0	0	0	0	0	0	0	0	0	0	0	0	0	0	0	0	0	0	0	0	0	0	0	0	0	0	0	0	0	0	0	0	0	0	0	0	0	0	0
hsa-miR-375	132	106	57	19	174	555	380	549	4	229	78	17	104	315	27	127	66	260	102	58	48	144	151	133	286	215	272	236	129	31	34	109	21	131	88	176	439	209	86	115	316	21	184	247	285	862	265	235	45
hsa-miR-376a-2-5p	0	0	0	0	0	0	0	0	0	0	0	0	0	0	0	0	0	0	0	0	0	0	0	0	0	0	0	0	0	0	0	0	0	0	0	0	0	0	0	0	0	0	0	0	0	0	0	0	0
hsa-miR-376a-3p	0	0	0	0	1	0	0	0	0	0	0	0	0	0	0	0	0	1	0	0	0	0	0	0	0	0	0	0	0	0	0	0	0	0	0	0	0	0	0	0	0	0	0	0	0	0	0	0	0
hsa-miR-376a-5p	0	0	0	0	0	0	0	0	0	0	0	0	0	0	0	0	0	0	0	0	0	0	0	0	0	0	0	0	0	0	0	0	0	0	0	0	0	0	0	0	0	0	0	0	0	0	0	0	0
hsa-miR-376b-3p	0	0	0	0	0	0	0	0	0	0	0	0	0	0	0	0	0	0	0	0	0	0	0	0	0	0	0	0	0	0	0	0	0	0	0	0	0	0	0	0	0	0	0	0	0	0	0	0	0
hsa-miR-376b-5p	0	0	0	0	0	0	0	0	0	0	0	0	0	0	0	0	0	0	0	0	0	0	0	0	0	0	0	0	0	0	0	0	0	0	0	0	0	0	0	0	0	0	0	0	0	0	0	0	0
hsa-miR-376c-3p	0	0	0	0	0	0	1	0	0	0	0	0	0	0	0	0	0	0	1	0	0	0	0	0	2	0	0	0	0	0	0	0	0	0	0	0	0	0	0	0	0	0	0	0	0	0	0	0	0
hsa-miR-376c-5p	0	0	0	0	0	0	0	0	0	0	0	0	0	0	0	0	0	0	0	0	0	0	0	0	0	0	0	0	0	0	0	0	0	0	0	0	0	0	0	0	0	0	0	0	0	0	0	0	0
hsa-miR-377-3p	2	0	0	0	0	0	0	0	0	0	0	1	0	0	0	0	0	0	0	0	0	0	0	0	1	0	0	0	0	0	0	0	0	0	0	0	0	0	0	0	0	0	0	0	0	1	0	0	0
hsa-miR-377-5p	0	0	0	0	0	0	0	0	0	0	0	1	0	0	0	0	0	1	0	0	0	0	0	0	1	0	0	0	0	0	0	0	0	0	0	0	0	0	0	0	0	0	0	0	0	0	0	0	0
hsa-miR-378a-3p	1359	1660	1579	623	720	789	623	968	1530	1173	807	1053	1397	470	1315	699	276	1246	1392	1230	1170	404	1065	941	721	357	601	543	672	1050	456	838	785	651	1120	534	683	443	304	382	599	572	806	189	328	595	992	624	286
hsa-miR-378a-5p	0	0	2	0	0	1	0	0	0	0	0	0	0	1	0	0	7	0	2	0	0	1	3	1	1	1	1	1	2	1	1	1	0	3	0	0	1	1	0	0	1	0	1	0	0	1	2	2	0
hsa-miR-378b	0	0	0	0	0	0	0	0	0	0	0	0	0	0	0	0	0	0	0	0	0	0	0	0	0	0	0	0	0	0	0	0	0	0	0	0	0	0	0	0	0	0	0	0	0	0	0	0	0
hsa-miR-378c	56	73	76	25	23	21	23	40	148	40	31	47	52	24	47	30	15	53	85	61	64	15	27	23	22	12	17	11	19	22	20	29	38	18	56	13	21	12	8	13	21	26	19	4	8	19	41	22	9
hsa-miR-378d	19	28	26	13	10	9	10	17	31	11	11	8	17	10	18	13	6	10	21	19	20	4	15	10	5	3	7	5	8	11	4	6	12	7	17	6	4	4	3	5	5	6	8	1	2	5	15	10	1
hsa-miR-378e	4	5	7	1	1	1	1	2	6	1	3	1	2	2	1	1	0	1	4	2	4	1	2	2	1	0	1	1	1	1	0	0	0	1	1	1	0	0	0	1	0	2	0	0	0	0	2	1	0
hsa-miR-378f	0	0	0	0	0	0	0	0	0	0	0	0	0	0	0	0	0	0	0	0	0	0	0	0	0	0	0	0	0	0	0	0	0	0	0	0	0	0	0	0	0	0	0	0	0	0	0	0	0
hsa-miR-378g	2	1	1	0	0	0	0	0	3	0	0	1	0	0	1	0	0	1	1	1	1	0	0	0	0	0	0	0	0	0	0	0	0	0	1	0	0	0	0	0	0	0	0	0	0	0	0	0	0
hsa-miR-378h	0	0	0	0	0	0	0	0	0	0	0	0	0	0	0	0	0	0	0	0	0	0	0	0	0	0	0	0	0	0	0	0	0	0	0	0	0	0	0	0	0	0	0	0	0	0	0	0	0
hsa-miR-378i	19	15	13	6	9	10	9	9	19	17	13	15	20	3	17	10	4	28	28	25	18	8	20	21	11	6	12	8	9	17	6	13	13	7	18	6	9	7	7	7	15	12	15	1	5	8	15	12	5
hsa-miR-378j	0	0	0	0	0	0	0	0	0	0	0	0	0	0	0	0	0	0	0	0	0	0	0	0	0	0	0	0	0	0	0	0	0	0	0	0	0	0	0	0	0	0	0	0	0	0	0	0	0
hsa-miR-379-3p	0	0	0	0	1	0	0	3	0	0	9	2	0	1	1	0	0	2	0	0	0	1	2	0	4	0	1	0	0	2	0	0	0	0	3	0	1	0	0	3	2	0	0	0	0	0	0	0	2
hsa-miR-379-5p	36	20	19	38	47	79	46	47	10	35	138	50	48	17	97	19	1	71	56	12	28	22	19	24	223	7	48	19	16	48	6	19	24	2	87	23	68	20	26	49	71	6	29	3	43	30	25	17	51
hsa-miR-380-3p	0	0	0	0	0	0	0	0	0	0	0	0	0	0	0	0	0	0	0	0	0	0	0	0	0	0	0	0	0	0	0	0	0	0	0	0	0	0	0	0	0	0	0	0	0	0	0	0	0
hsa-miR-380-5p	0	0	0	0	0	0	0	0	0	0	0	0	0	0	0	0	0	0	0	0	0	0	0	0	2	0	0	0	0	1	0	0	1	0	0	0	0	0	0	1	1	0	0	0	0	0	0	0	0
hsa-miR-381-3p	90	46	21	126	92	97	91	111	19	40	216	63	44	52	103	36	1	127	74	19	68	51	130	71	212	9	52	38	21	44	6	12	35	21	68	40	76	40	25	89	71	5	30	12	53	26	51	17	59
hsa-miR-381-5p	0	0	0	0	0	0	0	0	0	0	0	0	0	0	0	0	0	0	0	0	0	0	0	0	0	0	0	0	0	0	0	0	0	0	0	0	0	0	0	0	0	0	0	0	0	0	0	0	0
hsa-miR-382-3p	4	5	0	7	1	0	0	3	1	0	6	0	0	1	9	2	0	6	3	0	0	1	5	3	7	0	2	2	3	2	0	0	4	1	6	3	1	2	1	3	6	0	1	0	3	0	2	0	3
hsa-miR-382-5p	91	52	44	32	86	174	61	86	10	60	224	53	49	47	66	29	10	199	49	17	34	43	68	50	120	20	81	60	33	74	20	23	26	31	106	27	45	40	44	141	63	4	38	23	45	37	46	14	207
hsa-miR-383-3p	0	0	0	0	0	0	0	0	0	0	0	0	0	0	0	0	0	0	0	0	0	0	0	0	0	0	0	0	0	0	0	0	0	0	0	0	0	0	0	0	0	0	0	0	0	0	0	0	0
hsa-miR-383-5p	0	0	0	0	0	0	0	0	0	0	0	0	0	0	0	0	1	0	0	0	0	0	0	0	0	0	0	0	0	0	0	0	0	0	0	0	0	0	0	0	0	0	0	0	0	0	0	0	0
hsa-miR-384	0	0	0	0	0	0	0	0	0	0	0	0	0	0	0	0	0	0	0	0	0	0	0	0	0	0	0	0	0	0	0	0	0	0	0	0	0	0	0	0	0	0	0	0	0	0	0	0	0
hsa-miR-409-3p	118	163	79	94	341	614	268	650	11	183	947	174	124	190	336	107	33	487	111	58	78	171	219	187	908	98	421	413	258	247	61	50	36	123	354	77	332	193	228	754	536	10	198	156	332	342	170	75	1168
hsa-miR-409-5p	0	0	0	0	0	0	1	1	0	0	1	0	1	0	1	0	0	3	0	0	0	0	0	0	2	0	0	0	0	1	0	0	0	0	3	1	1	0	0	1	1	0	0	0	0	1	0	0	1
hsa-miR-410-3p	8	1	3	2	3	4	0	4	1	3	11	2	0	0	2	0	1	9	2	0	4	1	5	7	3	0	3	0	0	3	1	0	1	0	4	1	4	0	2	4	1	0	0	0	0	0	1	0	1
hsa-miR-410-5p	0	0	0	0	0	0	0	0	0	0	0	0	0	0	0	0	0	0	0	0	0	0	0	0	0	0	0	0	0	0	0	0	0	0	0	0	0	0	0	0	0	0	0	0	0	0	0	0	0
hsa-miR-411-3p	0	1	1	1	1	5	1	2	0	2	14	1	1	0	3	0	0	4	1	0	0	1	4	4	19	0	4	3	1	4	0	0	1	0	5	4	8	1	1	8	7	0	4	1	3	2	1	1	6
hsa-miR-411-5p	6	6	1	4	11	11	10	1	1	5	22	9	6	0	15	2	0	13	5	0	8	3	2	3	39	1	8	7	3	7	0	3	7	0	13	3	13	4	2	9	16	1	3	1	5	5	2	1	5
hsa-miR-412-3p	0	0	0	0	0	0	0	0	0	0	2	0	0	0	0	0	0	0	0	0	0	0	0	0	0	0	0	0	0	0	0	0	0	0	0	0	0	0	0	0	0	0	0	0	0	0	0	0	0
hsa-miR-412-5p	0	1	0	0	1	0	0	0	0	2	12	0	1	0	5	2	0	1	28	1	2	2	1	1	0	18	2	0	2	0	0	0	0	0	5	0	0	0	0	2	2	0	0	0	0	2	5	2	6
hsa-miR-421	10	20	10	6	6	9	5	6	14	6	10	13	5	10	14	11	7	13	15	21	12	5	23	11	16	3	8	9	17	7	8	8	6	13	11	7	10	13	3	4	15	20	11	4	6	2	25	2	6
hsa-miR-422a	1	2	2	1	0	0	0	1	3	1	0	1	1	0	3	0	0	1	1	1	1	0	1	0	0	0	0	0	0	1	0	1	1	1	1	0	0	0	1	0	0	1	1	0	0	0	0	0	0
hsa-miR-423-3p	993	1010	830	793	1279	2134	952	1545	1128	1093	1035	1274	1072	1383	1290	952	2508	1768	1239	1193	781	814	749	1365	1460	920	1071	1582	1206	1742	636	1102	1015	1173	1221	922	754	914	809	811	1402	756	1035	765	762	1550	926	460	1910
hsa-miR-423-5p	6740	3793	7912	13823	4240	2467	9798	20986	1715	3520	4075	1886	5550	67587	2380	6900	102994	1717	3017	27042	9716	5103	13169	11881	9942	23641	14765	21311	34294	13997	9049	2918	16318	47628	14689	21369	21296	29738	5012	41617	15059	8333	17592	15425	5437	18245	17313	31195	8079
hsa-miR-424-3p	20	32	21	18	21	25	35	42	8	20	22	24	25	46	47	28	28	53	51	75	29	32	15	57	46	26	31	64	64	66	31	23	23	58	15	36	39	24	10	25	46	45	59	25	20	64	46	13	25
hsa-miR-424-5p	1	4	4	9	4	0	1	3	20	4	4	5	11	0	17	6	0	9	30	7	16	2	2	11	4	3	2	2	3	8	0	11	20	1	3	2	0	0	0	1	5	17	3	0	0	1	4	1	0
hsa-miR-425-3p	57	31	19	40	17	15	28	15	49	20	32	27	24	22	38	14	34	32	42	34	17	21	56	48	33	11	28	29	38	40	15	10	34	55	22	27	21	32	9	15	28	60	30	19	11	20	36	12	7
hsa-miR-425-5p	158	273	162	116	132	174	232	127	143	137	206	174	145	146	214	145	347	147	101	165	77	199	209	199	157	81	173	256	380	118	81	76	64	455	157	123	159	352	58	183	208	125	118	183	84	173	246	105	71
hsa-miR-429	0	0	1	0	0	0	0	0	0	0	0	1	0	0	3	10	0	0	28	1	0	0	6	2	2	1	2	0	0	0	0	22	4	0	0	0	0	0	0	0	57	0	0	0	0	0	1	0	0
hsa-miR-431-3p	1	0	0	0	0	0	0	0	0	0	0	0	0	0	0	0	0	0	0	0	0	0	0	0	4	0	1	1	0	0	0	0	0	0	1	0	0	0	0	0	1	0	0	0	0	1	0	0	2
hsa-miR-431-5p	1	1	0	1	0	3	0	0	0	0	4	2	0	2	2	0	0	2	2	0	2	1	2	3	6	0	1	2	0	1	0	0	0	2	2	1	1	1	1	1	1	0	1	0	0	0	1	0	3
hsa-miR-432-3p	0	0	0	0	0	0	0	0	0	0	0	0	0	0	0	0	0	0	0	0	0	0	0	0	0	0	0	0	0	0	0	0	0	0	0	0	0	0	0	0	0	0	0	0	0	0	0	0	0
hsa-miR-432-5p	143	58	33	66	99	185	112	193	7	67	325	61	58	54	111	53	12	176	67	20	45	71	143	77	413	21	158	135	71	166	21	19	44	66	118	51	86	70	92	162	171	10	64	31	91	62	86	16	293
hsa-miR-433-3p	12	6	3	2	10	38	8	18	0	4	52	10	9	24	12	3	1	53	10	1	4	8	11	11	49	1	12	8	9	8	3	3	2	2	19	5	8	9	5	16	14	0	7	3	6	8	4	3	38
hsa-miR-433-5p	0	0	0	0	0	0	0	0	0	0	0	0	0	0	0	0	0	0	0	0	0	0	0	0	0	0	0	0	0	0	0	0	0	0	0	0	0	0	0	0	0	0	0	0	0	0	0	0	0
hsa-miR-448	0	0	0	0	0	0	0	0	0	0	0	0	0	0	0	0	0	0	0	0	0	0	0	0	0	0	0	0	0	0	0	0	0	0	0	0	0	0	0	0	0	0	0	0	0	0	0	0	0
hsa-miR-449a	0	0	0	0	0	0	0	0	0	0	0	0	0	0	2	0	0	0	4	0	0	0	0	0	0	0	0	0	0	0	0	0	0	0	0	0	0	0	0	0	17	0	0	0	0	0	0	0	0
hsa-miR-449b-3p	0	0	0	0	0	0	0	0	0	0	0	0	0	0	0	0	0	0	0	0	0	0	0	0	0	0	0	0	0	0	0	0	0	0	0	0	0	0	0	0	0	0	0	0	0	0	0	0	0
hsa-miR-449b-5p	0	0	0	0	0	0	0	0	0	0	0	0	0	0	0	0	0	0	0	0	0	0	0	0	0	0	0	0	0	0	0	0	0	0	0	0	0	0	0	0	1	0	0	0	0	0	0	0	0
hsa-miR-449c-3p	0	0	0	0	0	0	0	0	0	0	0	0	0	0	0	0	0	0	0	0	0	0	0	0	0	0	0	0	0	0	0	0	0	0	0	0	0	0	0	0	0	0	0	0	0	0	0	0	0
hsa-miR-449c-5p	1	0	0	0	0	0	0	0	0	0	0	1	0	0	41	0	0	0	26	0	0	0	0	0	0	0	1	0	0	0	0	0	0	0	0	0	0	0	0	0	551	0	0	0	0	0	0	0	0
hsa-miR-450a-1-3p	0	0	0	0	0	0	0	0	0	0	0	0	0	1	0	0	0	0	0	0	0	0	0	0	0	0	0	0	0	0	0	0	0	0	0	0	0	0	0	0	0	0	0	0	0	0	0	0	0
hsa-miR-450a-2-3p	1	4	1	2	3	1	1	0	0	2	1	1	5	0	4	0	0	3	4	1	1	0	0	7	2	0	0	2	1	10	0	0	4	1	0	0	0	0	0	0	1	4	3	0	1	2	0	1	2
hsa-miR-450a-5p	10	32	12	12	11	11	11	9	12	14	21	17	18	1	37	11	1	19	33	18	14	10	8	32	44	7	16	30	30	44	5	23	29	33	12	20	25	13	3	5	34	74	64	8	18	25	15	7	3
hsa-miR-450b-3p	0	0	0	0	0	0	0	0	0	0	0	0	0	0	0	0	0	0	0	0	0	0	0	0	0	0	0	0	0	0	0	0	0	0	0	0	0	0	0	0	0	0	0	0	0	0	0	0	0
hsa-miR-450b-5p	12	51	23	31	16	6	12	7	75	29	22	28	37	15	60	25	2	26	91	21	85	9	5	52	23	20	14	11	16	64	7	52	89	12	45	15	11	12	3	12	28	65	34	3	11	8	22	14	4
hsa-miR-451a	92556	131152	58176	69483	11996	10411	69517	8070	92895	17312	32189	10565	25212	71970	65758	25269	97796	13336	40485	50049	17205	21509	75004	36077	18390	13423	41041	71289	117538	11213	19245	7724	20443	155377	19148	31207	45293	148095	4826	63126	55725	94155	25824	47936	9033	35605	182760	29465	5202
hsa-miR-451b	0	0	0	0	0	0	0	0	0	0	0	0	0	0	0	0	0	0	0	0	0	0	0	0	0	0	0	0	0	0	0	0	0	0	0	0	0	0	0	0	0	0	0	0	0	0	0	0	0
hsa-miR-452-3p	0	0	0	0	0	0	0	0	0	0	0	0	0	0	0	0	0	0	0	0	0	0	0	0	0	0	0	0	0	0	0	0	0	0	0	0	0	0	0	0	0	0	0	0	0	0	0	0	0
hsa-miR-452-5p	5	11	4	1	5	4	1	8	3	6	12	19	10	0	11	18	0	12	9	6	14	2	4	1	3	4	2	2	1	1	2	6	5	0	4	3	1	0	0	1	5	0	2	1	2	1	2	0	1
hsa-miR-454-3p	2	0	1	1	3	4	2	0	8	0	1	0	1	0	2	0	0	2	1	0	0	0	1	1	1	1	2	5	1	4	0	1	1	0	3	3	0	6	0	1	2	4	0	0	0	0	0	0	1
hsa-miR-454-5p	2	5	1	3	3	3	5	4	4	3	4	6	2	1	3	2	0	3	1	8	6	3	6	3	3	3	4	8	6	5	2	2	2	12	2	2	2	8	0	9	5	2	3	1	2	4	4	1	3
hsa-miR-455-3p	0	0	0	0	0	0	0	0	0	0	0	0	0	0	0	0	0	0	0	0	0	0	0	0	0	0	0	0	0	0	0	0	0	0	0	0	0	0	0	0	0	0	0	0	0	0	0	0	0
hsa-miR-455-5p	0	5	1	4	0	1	1	10	0	2	0	4	0	0	4	9	4	3	4	5	13	1	10	1	1	0	5	3	2	0	0	5	2	1	0	2	2	2	0	1	5	0	6	0	1	2	1	9	0
hsa-miR-466	0	0	0	0	0	0	0	0	0	0	0	0	0	0	0	0	0	0	0	0	0	0	0	0	0	0	0	0	0	0	0	0	0	0	0	0	0	0	0	0	0	0	0	0	0	0	0	0	0
hsa-miR-483-3p	0	0	0	0	0	0	0	0	0	0	0	0	0	0	0	0	0	0	0	0	0	0	0	0	0	0	0	0	0	0	0	0	0	0	0	0	1	0	0	0	0	0	0	0	0	3	0	0	0
hsa-miR-483-5p	5	3	3	136	1	0	2	25	1	2	5	2	4	80	0	49	22	3	5	25	60	1	53	14	6	54	12	8	21	2	3	7	11	16	3	50	28	11	4	13	19	1	55	3	9	46	30	37	1
hsa-miR-484	198	209	254	180	149	243	199	228	342	201	200	205	237	497	247	162	919	283	281	352	244	161	261	193	209	170	257	322	320	236	295	243	150	491	843	191	166	335	142	344	269	154	138	212	87	168	441	216	333
hsa-miR-485-3p	0	0	0	0	0	10	3	15	0	0	3	0	0	0	1	0	0	5	0	0	1	1	0	0	4	0	1	0	0	0	0	0	0	0	0	0	0	0	0	5	2	0	0	1	0	2	0	0	10
hsa-miR-485-5p	11	8	8	12	22	39	21	44	0	11	43	12	9	18	12	7	2	22	4	2	5	8	16	14	57	17	22	21	13	13	3	4	2	15	16	8	27	15	18	66	24	1	19	7	22	31	14	7	46
hsa-miR-486-3p	159	276	292	92	257	335	433	344	72	349	192	242	271	280	247	192	636	202	96	602	50	194	199	215	208	339	517	654	866	269	323	117	60	666	197	85	310	508	75	385	287	133	87	376	122	314	576	150	190
hsa-miR-486-5p	26697	52250	65710	47979	19880	16589	65066	35695	106933	22254	28635	16457	36578	188756	30596	35607	168797	17911	19606	69008	11255	26887	20789	12173	18149	28695	41771	86012	169387	15694	62044	14088	23366	189087	120468	22969	51733	95556	13172	85335	39648	28384	15767	72789	10431	40166	141604	64411	22959
hsa-miR-487a-3p	0	0	0	0	1	0	0	0	0	0	0	0	0	0	0	0	0	0	0	0	0	0	0	0	0	0	0	0	0	0	0	0	0	0	0	0	0	0	0	0	0	0	0	0	0	0	0	0	0
hsa-miR-487a-5p	0	0	1	0	0	0	0	0	0	0	3	0	0	0	1	0	0	1	0	0	0	0	0	0	3	0	1	0	0	0	0	0	0	0	0	1	0	0	0	2	1	0	0	0	1	1	0	0	2
hsa-miR-487b-3p	1	0	0	0	0	0	2	2	0	1	0	0	0	0	1	2	0	3	0	1	0	1	2	1	4	0	1	0	0	0	0	0	0	2	2	0	0	0	0	2	2	0	0	0	0	0	1	0	1
hsa-miR-487b-5p	0	0	0	0	1	0	0	0	0	0	0	0	0	0	0	0	0	0	0	0	0	0	0	0	0	0	0	0	0	0	0	0	0	0	0	0	0	0	0	0	0	0	0	0	0	0	0	0	0
hsa-miR-488-3p	0	0	0	0	0	0	0	0	0	0	0	0	0	0	0	0	0	0	0	0	0	0	0	0	0	0	0	0	0	0	0	0	0	0	0	0	0	0	0	0	0	0	0	0	0	0	0	0	0
hsa-miR-488-5p	0	0	0	0	0	0	0	0	0	0	0	0	0	0	0	0	0	0	0	0	0	0	0	0	0	0	0	0	0	0	0	0	0	0	0	0	0	0	0	0	0	0	0	0	0	0	0	0	0
hsa-miR-489-3p	0	0	0	0	0	0	0	0	0	0	0	0	0	0	0	0	0	0	0	0	0	0	0	0	0	0	0	0	0	0	0	0	0	0	0	0	0	0	0	0	0	0	0	0	0	0	0	0	0
hsa-miR-489-5p	0	0	0	0	0	0	0	0	0	0	0	0	0	0	0	0	0	0	0	0	0	0	0	0	0	0	0	0	0	0	0	0	0	0	0	0	0	0	0	0	0	0	0	0	0	0	0	0	0
hsa-miR-490-3p	0	0	0	0	0	0	0	0	0	0	1	0	1	0	0	0	0	0	0	0	0	0	0	0	0	0	0	0	0	0	0	0	0	0	0	0	0	0	0	0	0	0	0	0	0	0	0	0	0
hsa-miR-490-5p	0	0	0	0	0	0	0	0	0	0	0	0	0	0	0	0	0	0	0	0	0	0	0	0	0	0	0	0	0	0	0	0	0	0	0	0	0	0	0	0	0	0	0	0	0	0	0	0	0
hsa-miR-491-3p	0	0	0	0	0	0	0	0	0	0	0	0	0	0	0	0	0	0	0	0	0	0	0	0	0	0	0	0	0	0	0	0	0	0	0	0	0	0	0	0	0	0	0	0	0	0	0	0	0
hsa-miR-491-5p	0	0	0	0	0	0	0	0	0	0	0	1	0	0	0	0	0	1	0	0	0	0	0	0	0	0	0	0	0	0	0	0	0	0	0	0	0	0	0	0	0	0	0	0	0	0	0	0	0
hsa-miR-492	0	0	0	0	0	0	0	0	0	0	0	0	0	0	0	0	0	0	0	0	0	0	0	0	0	0	0	0	0	0	0	0	0	0	0	0	0	0	0	0	0	0	0	0	0	0	0	0	0
hsa-miR-493-3p	19	5	2	21	16	21	22	23	3	7	56	18	11	8	33	10	1	28	18	2	14	12	13	15	56	1	14	9	7	15	1	2	4	2	16	14	10	6	3	11	17	1	6	2	12	7	10	1	17
hsa-miR-493-5p	13	13	7	20	36	35	12	18	6	17	85	29	19	11	50	10	1	52	25	4	16	9	14	20	81	5	20	14	5	27	3	5	11	1	49	5	20	9	12	25	30	2	16	4	20	6	12	3	25
hsa-miR-494-3p	3	0	0	4	2	5	1	0	1	4	10	4	2	2	10	2	0	11	16	0	1	2	3	2	18	1	1	1	1	7	0	1	6	0	13	2	2	0	4	4	2	0	0	0	3	0	2	1	11
hsa-miR-494-5p	0	0	0	0	0	0	0	0	0	0	0	0	0	0	0	0	0	0	0	0	0	0	0	0	0	0	0	0	0	0	0	0	0	0	0	0	0	0	0	0	0	0	0	0	0	0	0	0	0
hsa-miR-495-3p	52	9	4	8	9	17	19	2	0	0	30	7	6	6	13	5	2	24	4	1	16	4	25	21	45	4	21	14	8	17	2	3	4	10	12	7	8	4	2	25	14	6	20	4	6	6	10	4	13
hsa-miR-495-5p	0	0	0	0	0	0	0	0	0	0	0	0	0	0	0	0	0	0	0	0	0	0	0	0	0	0	0	0	0	0	0	0	0	0	0	0	0	0	0	0	0	0	0	0	0	0	0	0	0
hsa-miR-496	0	0	0	0	0	0	0	0	0	0	2	0	0	0	0	0	0	0	0	0	0	0	0	0	0	0	0	0	0	0	0	0	0	0	0	0	0	0	0	0	0	0	0	0	0	0	0	0	0
hsa-miR-497-3p	0	0	0	0	0	0	0	0	0	0	0	0	0	0	0	0	0	0	0	0	0	0	0	0	0	0	0	0	0	0	0	0	0	0	0	0	0	0	0	0	0	0	0	0	0	0	0	0	0
hsa-miR-497-5p	0	0	0	0	0	0	0	2	0	0	0	0	0	0	0	0	0	0	0	0	0	0	0	0	0	0	0	0	0	0	0	0	0	0	0	0	0	0	0	0	0	0	0	0	0	1	0	0	0
hsa-miR-498	0	0	0	0	0	0	0	0	0	0	0	0	0	0	0	0	0	0	0	0	0	0	0	0	0	0	0	0	0	0	0	0	0	0	0	0	0	0	0	0	0	0	0	0	0	0	0	0	0
hsa-miR-499a-3p	0	0	0	0	0	0	0	0	0	0	0	0	0	0	0	0	0	0	0	0	0	0	0	0	0	0	0	0	0	0	0	0	0	0	0	0	0	0	0	0	0	0	0	0	0	0	0	0	0
hsa-miR-499a-5p	11	5	3	10	4	4	5	1	6	9	8	5	11	6	9	8	1	9	16	10	14	3	5	20	10	22	8	8	6	9	2	7	10	9	12	8	5	5	1	3	11	13	10	2	7	7	7	2	0
hsa-miR-499b-3p	0	0	0	0	0	0	0	0	0	0	0	0	0	0	0	0	0	0	0	0	0	0	0	0	0	0	0	0	0	0	0	0	0	0	0	0	0	0	0	0	0	0	0	0	0	0	0	0	0
hsa-miR-499b-5p	0	0	0	0	0	0	0	0	0	0	0	0	0	0	0	0	0	0	0	0	0	0	0	0	0	0	0	0	0	0	0	0	0	0	0	0	0	0	0	0	0	0	0	0	0	0	0	0	0
hsa-miR-500a-3p	27	33	25	8	8	16	8	5	44	12	12	18	29	6	36	6	1	34	22	21	18	8	9	6	12	11	10	11	21	21	15	31	24	19	24	9	9	15	5	4	12	27	11	4	3	7	29	4	7
hsa-miR-500a-5p	0	0	0	0	0	0	0	0	0	0	0	0	0	0	0	0	0	0	0	0	0	0	0	0	0	0	0	0	0	0	0	0	0	0	0	0	0	0	0	0	0	0	0	0	0	0	0	0	0
hsa-miR-500b-3p	0	0	0	0	0	0	0	0	0	0	0	0	0	0	0	0	0	0	0	0	0	0	0	1	1	0	0	0	0	0	0	0	0	0	0	0	0	0	0	0	0	0	0	0	0	2	0	0	0
hsa-miR-500b-5p	0	0	0	0	0	0	0	0	0	0	0	0	0	0	0	0	0	0	0	0	0	0	0	0	0	0	0	0	0	0	0	0	0	0	0	0	0	0	0	0	0	0	0	0	0	0	0	0	0
hsa-miR-501-3p	87	139	215	80	55	60	149	196	112	85	86	89	151	345	91	108	501	98	109	285	144	110	92	78	70	201	136	165	390	75	194	183	71	476	623	168	154	210	45	238	120	82	68	167	40	103	367	258	81
hsa-miR-501-5p	1	0	0	0	0	0	0	0	0	0	0	0	0	0	0	0	0	0	0	0	0	0	0	0	0	0	0	0	0	0	0	1	0	0	0	0	0	0	0	0	0	0	0	0	0	0	0	0	0
hsa-miR-502-3p	33	32	35	16	7	11	13	20	60	9	15	19	27	20	35	12	22	29	41	29	29	13	11	12	14	16	14	21	37	24	28	37	25	37	63	20	21	28	6	15	15	32	10	8	4	13	57	13	9
hsa-miR-502-5p	0	0	0	0	0	0	0	0	0	0	0	0	0	0	0	0	0	0	0	0	0	0	0	0	0	0	0	0	0	0	0	0	0	0	0	0	0	0	0	0	0	0	0	0	0	0	0	0	0
hsa-miR-503-3p	0	0	0	0	0	0	0	0	0	0	0	0	0	0	0	0	0	0	0	0	0	0	0	0	0	0	0	0	0	0	0	0	0	0	0	0	0	0	0	0	0	0	0	0	0	0	0	0	0
hsa-miR-503-5p	17	30	15	10	8	14	19	13	23	12	12	20	22	31	54	19	17	12	26	45	34	22	4	6	5	7	22	26	50	15	26	15	11	31	10	5	20	34	4	8	16	19	10	15	5	11	62	5	6
hsa-miR-504-3p	0	0	0	0	0	0	0	0	0	0	2	0	0	0	0	0	0	0	0	0	0	0	0	0	0	0	0	0	0	0	0	0	0	0	0	0	0	0	0	0	0	0	0	0	0	0	0	0	0
hsa-miR-504-5p	0	1	0	0	0	3	0	2	0	1	3	1	1	0	4	3	0	2	6	2	4	2	0	0	1	0	1	0	0	1	0	1	1	0	2	0	1	0	1	1	1	0	2	0	0	0	0	0	3
hsa-miR-505-3p	2	0	2	0	1	4	1	3	1	3	2	4	1	3	4	1	1	5	1	4	7	2	1	3	3	0	2	1	1	2	0	4	3	4	2	5	2	2	1	1	2	1	2	1	0	2	3	1	1
hsa-miR-505-5p	3	6	2	1	4	1	12	11	0	2	1	2	1	8	0	9	68	0	2	21	0	5	8	6	11	4	8	20	20	5	2	2	2	18	1	4	15	19	1	15	18	3	4	8	5	14	9	5	8
hsa-miR-506-3p	0	0	0	0	0	0	0	0	0	0	0	0	0	0	0	0	0	0	0	0	0	0	0	0	0	0	0	0	0	0	0	0	0	0	0	0	0	0	0	0	0	0	0	0	0	0	0	0	0
hsa-miR-506-5p	0	0	0	0	0	0	0	0	0	0	0	0	0	0	0	0	0	0	0	0	0	0	0	0	0	0	0	0	0	0	0	0	0	0	0	0	0	0	0	0	0	0	0	0	0	0	0	0	0
hsa-miR-507	0	0	0	0	0	0	0	0	0	0	0	0	0	0	0	0	0	0	0	0	0	0	0	0	0	0	0	0	0	0	0	0	0	0	0	0	0	0	0	0	0	0	0	0	0	0	0	0	0
hsa-miR-508-3p	0	0	0	0	0	0	0	0	0	0	0	0	0	2	0	0	0	0	21	1	0	0	0	0	0	0	0	0	0	0	0	0	0	0	0	0	0	0	0	1	6	0	0	0	0	0	0	0	0
hsa-miR-508-5p	0	0	0	0	0	0	0	0	0	0	0	0	0	0	0	0	0	0	0	0	0	0	0	0	0	0	0	0	0	0	0	0	0	0	0	0	0	0	0	0	0	0	0	0	0	0	0	0	0
hsa-miR-509-3-5p	0	0	0	0	0	0	0	0	0	1	0	0	0	0	1	0	0	0	13	0	0	0	0	0	0	0	0	1	0	0	0	0	0	0	0	0	0	0	0	0	1	0	0	0	0	0	0	0	0
hsa-miR-509-3p	2	0	0	0	0	2	0	1	0	0	0	1	0	1	2	0	0	0	28	2	0	0	0	0	0	0	0	0	0	0	0	0	0	0	0	0	0	0	0	0	2	0	0	0	0	0	0	0	0
hsa-miR-509-5p	0	0	0	0	0	0	0	0	0	0	0	0	0	0	0	0	0	0	0	0	0	0	0	0	0	0	0	0	0	0	0	0	0	0	0	0	0	0	0	0	0	0	0	0	0	0	0	0	0
hsa-miR-510-3p	0	0	0	0	0	0	0	0	0	0	0	0	0	0	0	0	0	0	0	0	0	0	0	0	0	0	0	0	0	0	0	0	0	0	0	0	0	0	0	0	0	0	0	0	0	0	0	0	0
hsa-miR-510-5p	0	0	0	0	0	0	0	0	0	0	0	0	0	0	0	0	0	0	0	0	0	0	0	0	0	0	0	0	0	0	0	0	0	0	0	0	0	0	0	0	0	0	0	0	0	0	0	0	0
hsa-miR-511-3p	0	0	0	0	0	0	0	0	0	0	0	0	0	0	0	0	0	0	6	0	0	0	0	0	0	2	0	0	0	0	0	0	0	0	0	0	0	0	0	0	0	0	0	0	0	0	1	0	0
hsa-miR-511-5p	15	50	13	9	24	19	33	21	1	21	14	16	17	5	23	37	0	27	43	51	9	17	99	17	53	25	35	41	16	6	13	5	9	22	2	19	51	18	3	9	17	1	28	5	19	95	13	8	3
hsa-miR-512-3p	0	0	0	0	0	0	0	0	0	0	0	0	0	0	0	0	0	0	0	0	0	0	0	0	0	0	0	0	0	0	0	0	0	0	0	0	0	0	0	0	0	0	0	0	0	0	0	0	0
hsa-miR-512-5p	0	0	0	0	0	0	0	0	0	0	0	0	0	0	0	0	0	0	0	0	0	0	0	0	0	0	0	0	0	0	0	0	0	0	0	0	0	0	0	0	0	0	0	0	0	0	0	0	0
hsa-miR-513a-3p	0	0	0	0	0	0	0	0	0	0	0	0	0	0	0	0	0	0	0	0	0	0	0	0	0	0	0	0	0	0	0	0	0	0	0	0	0	0	0	0	0	0	0	0	0	0	0	0	0
hsa-miR-513a-5p	0	0	0	0	0	0	0	0	0	0	0	0	0	0	0	0	0	0	0	0	0	0	0	0	0	0	0	0	0	0	0	0	0	0	0	0	0	0	0	0	0	0	0	0	0	0	0	0	0
hsa-miR-513b-3p	0	0	0	0	0	0	0	0	0	0	0	0	0	0	0	0	0	0	0	0	0	0	0	0	0	0	0	0	0	0	0	0	0	0	0	0	0	0	0	0	0	0	0	0	0	0	0	0	0
hsa-miR-513b-5p	0	0	0	0	0	0	0	0	0	0	0	0	0	0	0	0	0	0	0	0	0	0	0	0	0	0	0	0	0	0	0	0	0	0	0	0	0	0	0	0	0	0	0	0	0	0	0	0	0
hsa-miR-513c-3p	0	0	0	0	0	0	0	0	0	0	0	0	0	0	0	0	0	0	0	0	0	0	0	0	0	0	0	0	0	0	0	0	0	0	0	0	0	0	0	0	0	0	0	0	0	0	0	0	0
hsa-miR-513c-5p	0	0	0	0	0	0	0	0	0	0	0	0	0	1	0	0	0	0	5	0	0	0	0	0	0	0	0	0	0	0	0	0	0	0	0	0	0	0	0	0	1	0	0	0	0	0	0	0	0
hsa-miR-514a-3p	1	1	1	1	0	0	0	3	0	0	0	0	0	2	1	0	0	0	4	1	2	0	1	1	0	0	0	0	0	0	0	0	0	0	0	0	0	0	0	0	0	0	0	0	0	0	0	0	0
hsa-miR-514a-5p	0	0	0	0	0	0	0	0	0	0	0	0	0	0	0	0	0	0	0	0	0	0	0	0	0	0	0	0	0	0	0	0	0	0	0	0	0	0	0	0	0	0	0	0	0	0	0	0	0
hsa-miR-514b-3p	0	0	0	0	0	0	0	0	0	0	0	0	0	0	0	0	0	0	0	0	0	0	0	0	0	0	0	0	0	0	0	0	0	0	0	0	0	0	0	0	0	0	0	0	0	0	0	0	0
hsa-miR-514b-5p	0	0	0	0	0	0	0	0	0	0	0	0	0	0	0	0	0	0	0	0	0	0	0	0	0	0	0	0	0	0	0	0	0	0	0	0	0	0	0	0	0	0	0	0	0	0	0	0	0
hsa-miR-515-3p	0	0	0	0	0	0	0	0	0	0	0	0	0	0	0	0	0	0	0	0	0	0	0	0	0	0	0	0	0	0	0	0	0	0	0	0	0	0	0	0	0	0	0	0	0	0	0	0	0
hsa-miR-515-5p	0	0	0	0	0	0	0	0	0	0	0	0	0	0	0	0	0	0	0	0	0	0	0	0	0	0	0	0	0	0	0	0	0	0	0	0	0	0	0	0	0	0	0	0	0	0	0	0	0
hsa-miR-516a-3p	0	0	0	0	0	0	0	0	0	0	0	0	0	0	0	0	0	0	0	0	0	0	0	0	0	0	0	0	0	0	0	0	0	0	0	0	0	0	0	0	0	0	0	0	0	0	0	0	0
hsa-miR-516a-5p	0	0	0	0	0	0	0	0	0	0	0	0	0	0	0	1	0	0	0	0	0	0	0	0	0	0	0	0	0	0	0	0	0	0	0	0	0	0	0	0	0	0	0	0	0	0	0	0	0
hsa-miR-516b-3p	0	0	0	0	0	0	0	0	0	0	0	0	0	0	0	0	0	0	0	0	0	0	0	0	0	0	0	0	0	0	0	0	0	0	0	0	0	0	0	0	0	0	0	0	0	0	0	0	0
hsa-miR-516b-5p	0	2	0	0	3	0	1	0	0	0	2	0	0	0	1	0	0	0	0	0	8	1	0	1	0	0	0	0	0	0	0	1	0	0	0	0	0	0	0	0	0	0	0	0	0	2	0	0	0
hsa-miR-517-5p	0	0	0	0	0	0	0	0	0	0	0	0	0	0	0	0	0	0	0	0	0	0	0	0	0	0	0	0	0	0	0	0	0	0	0	0	0	0	0	0	0	0	0	0	0	0	0	0	0
hsa-miR-517a-3p	0	0	0	0	0	0	0	0	0	0	0	0	0	0	0	0	0	0	0	0	0	0	0	0	0	0	0	0	0	0	0	0	0	0	0	0	0	0	0	0	0	0	0	0	0	0	0	0	0
hsa-miR-517b-3p	0	0	0	0	0	0	0	0	0	0	0	0	0	0	0	0	0	0	0	0	0	0	0	0	0	0	0	0	0	0	0	0	0	0	0	0	0	0	0	0	0	0	0	0	0	0	0	0	0
hsa-miR-517c-3p	0	0	0	0	0	0	0	0	0	0	0	0	0	0	0	0	0	0	0	0	0	0	0	0	0	0	0	0	0	0	0	0	0	0	0	0	0	0	0	0	0	0	0	0	0	0	0	0	0
hsa-miR-518a-3p	0	0	0	0	0	0	0	0	0	0	0	0	0	0	0	0	0	0	0	0	0	0	0	0	0	0	0	0	0	0	0	0	0	0	0	0	0	0	0	0	0	0	0	0	0	0	0	0	0
hsa-miR-518a-5p	0	0	0	0	0	0	0	0	0	0	0	0	0	0	0	0	0	0	0	0	0	0	0	0	0	0	0	0	0	0	0	0	0	0	0	0	0	0	0	0	0	0	0	0	0	0	0	0	0
hsa-miR-518b	0	0	0	0	0	0	0	0	0	0	0	0	0	0	0	0	0	0	0	0	0	0	0	0	0	0	0	0	0	0	0	0	0	0	0	0	0	0	0	0	0	0	0	0	0	0	0	0	0
hsa-miR-518c-3p	0	0	0	0	0	0	0	0	0	0	0	0	0	0	0	0	0	0	0	0	0	0	0	0	0	0	0	0	0	0	0	0	0	0	0	0	0	0	0	0	0	0	0	0	0	0	0	0	0
hsa-miR-518c-5p	0	0	0	0	0	0	0	0	0	0	0	0	0	0	0	0	0	0	0	0	0	0	0	0	0	0	0	0	0	0	0	0	0	0	0	0	0	0	0	0	0	0	0	0	0	0	0	0	0
hsa-miR-518d-3p	0	0	0	0	0	0	0	0	0	0	0	0	0	0	0	0	0	0	0	0	0	0	0	0	0	0	0	0	0	0	0	0	0	0	0	0	0	0	0	0	0	0	0	0	0	0	0	0	0
hsa-miR-518d-5p	0	0	0	0	0	0	0	0	0	0	0	0	0	0	0	0	0	0	0	0	0	0	0	0	0	0	0	0	0	0	0	0	0	0	0	0	0	0	0	0	0	0	0	0	0	0	0	0	0
hsa-miR-518e-3p	0	0	0	0	0	0	0	0	0	0	0	0	0	0	0	0	0	0	0	0	0	0	0	0	0	0	0	0	0	0	0	0	0	0	0	0	0	0	0	0	0	0	0	0	0	0	0	0	0
hsa-miR-518e-5p	0	0	0	0	0	0	0	0	0	0	0	0	0	0	0	0	0	0	0	0	0	0	0	0	0	0	0	0	0	0	0	0	0	0	0	0	0	0	0	0	0	0	0	0	0	0	0	0	0
hsa-miR-518f-3p	0	0	0	0	0	0	0	0	0	0	0	0	0	0	0	0	0	0	0	0	0	0	0	0	0	0	0	0	0	0	0	0	0	0	0	0	0	0	0	0	0	0	0	0	0	0	0	0	0
hsa-miR-518f-5p	0	0	0	0	0	0	0	0	0	0	0	0	0	0	0	0	0	0	0	0	0	0	0	0	0	0	0	0	0	0	0	0	0	0	0	0	0	0	0	0	0	0	0	0	0	0	0	0	0
hsa-miR-519a-3p	0	0	0	0	0	0	0	0	0	0	0	0	0	0	0	0	0	0	0	0	0	0	0	0	0	0	0	0	0	0	0	0	0	0	0	0	0	0	0	0	0	0	0	0	0	0	0	0	0
hsa-miR-519a-5p	0	0	0	0	0	0	0	0	0	0	0	0	0	0	0	0	0	0	0	0	0	0	0	0	0	0	0	0	0	0	0	0	0	0	0	0	0	0	0	0	0	0	0	0	0	0	0	0	0
hsa-miR-519b-3p	0	0	0	0	0	0	0	0	0	0	0	0	0	0	0	0	0	0	0	0	0	0	0	0	0	0	0	0	0	0	0	0	0	0	0	0	0	0	0	0	0	0	0	0	0	0	0	0	0
hsa-miR-519b-5p	0	0	0	0	0	0	0	0	0	0	0	0	0	0	0	0	0	0	0	0	0	0	0	0	0	0	0	0	0	0	0	0	0	0	0	0	0	0	0	0	0	0	0	0	0	0	0	0	0
hsa-miR-519c-3p	0	0	0	0	0	0	0	0	0	0	0	0	0	0	0	0	0	0	0	0	0	0	0	0	0	0	0	0	0	0	0	0	0	0	0	0	0	0	0	0	0	0	0	0	0	0	0	0	0
hsa-miR-519c-5p	0	0	0	0	0	0	0	0	0	0	0	0	0	0	0	0	0	0	0	0	0	0	0	0	0	0	0	0	0	0	0	0	0	0	0	0	0	0	0	0	0	0	0	0	0	0	0	0	0
hsa-miR-519d-3p	0	0	0	0	0	0	0	0	0	0	0	0	0	0	0	0	0	0	0	0	0	0	0	0	0	0	0	0	0	0	0	0	0	0	0	0	0	0	0	0	0	0	0	0	0	0	0	0	0
hsa-miR-519d-5p	0	0	0	0	0	0	0	0	0	0	0	0	0	0	0	0	0	0	0	0	0	0	0	0	0	0	0	0	0	0	0	0	0	0	0	0	0	0	0	0	0	0	0	0	0	0	0	0	0
hsa-miR-519e-3p	0	0	0	0	0	0	0	0	0	0	0	0	0	0	0	0	0	0	0	0	0	0	0	0	0	0	0	0	0	0	0	0	0	0	0	0	0	0	0	0	0	0	0	0	0	0	0	0	0
hsa-miR-519e-5p	0	0	0	0	0	0	0	0	0	0	0	0	0	0	0	0	0	0	0	0	0	0	0	0	0	0	0	0	0	0	0	0	0	0	0	0	0	0	0	0	0	0	0	0	0	0	0	0	0
hsa-miR-520a-3p	0	0	0	0	0	0	0	0	0	0	0	0	0	0	0	0	0	0	0	0	0	0	0	0	0	0	0	0	1	0	1	0	0	0	0	0	0	0	0	0	0	0	0	0	0	0	0	0	0
hsa-miR-520a-5p	0	0	0	0	0	0	0	0	0	0	0	0	0	0	0	0	0	0	0	0	0	0	0	0	0	0	0	0	0	0	0	0	0	0	0	0	0	0	0	0	0	0	0	0	0	0	0	0	0
hsa-miR-520b	0	0	0	0	0	0	0	0	0	0	0	0	0	0	0	0	0	0	0	0	0	0	0	0	0	0	0	0	0	0	0	0	0	0	0	0	0	0	0	0	0	0	0	0	0	0	0	0	0
hsa-miR-520c-3p	0	0	0	0	0	0	0	0	0	0	0	0	0	0	0	0	0	0	0	0	0	0	0	0	0	0	0	0	0	0	0	0	0	0	0	0	0	0	0	0	0	0	0	0	0	0	0	0	0
hsa-miR-520c-5p	0	0	0	0	0	0	0	0	0	0	0	0	0	0	0	0	0	0	0	0	0	0	0	0	0	0	0	0	0	0	0	0	0	0	0	0	0	0	0	0	0	0	0	0	0	0	0	0	0
hsa-miR-520d-3p	0	0	0	0	0	0	0	0	0	0	0	0	0	0	0	0	0	0	0	0	0	0	0	0	0	0	0	0	0	0	0	0	0	0	0	0	0	0	0	0	0	0	0	0	0	0	0	0	0
hsa-miR-520d-5p	0	0	0	0	0	0	0	0	0	0	0	0	0	0	0	0	0	0	0	0	0	0	0	0	0	0	0	0	0	0	0	0	0	0	0	0	0	0	0	0	0	0	0	0	0	0	0	0	0
hsa-miR-520e	0	0	0	0	0	0	0	0	0	0	0	0	0	0	0	0	0	0	0	0	0	0	0	0	0	0	0	0	0	0	0	0	0	0	0	0	0	0	0	0	0	0	0	0	0	0	0	0	0
hsa-miR-520f-3p	0	0	0	0	0	0	0	0	0	0	0	0	0	0	0	0	0	0	0	0	0	0	0	0	0	0	0	0	0	0	0	0	0	0	0	0	0	0	0	0	0	0	0	0	0	0	0	0	0
hsa-miR-520f-5p	0	0	0	0	0	0	0	0	0	0	0	0	0	0	0	0	0	0	0	0	0	0	0	0	0	0	0	0	0	0	0	0	0	0	0	0	0	0	0	0	0	0	0	0	0	0	0	0	0
hsa-miR-520g-3p	0	0	0	0	0	0	0	0	0	0	0	0	0	0	0	0	0	0	0	0	0	0	0	0	0	0	0	0	0	0	0	0	0	0	0	0	0	0	0	0	0	0	0	0	0	0	0	0	0
hsa-miR-520g-5p	0	0	0	0	0	0	0	0	0	0	0	0	0	0	0	0	0	0	0	0	0	0	0	0	0	0	0	0	0	0	0	0	0	0	0	0	0	0	0	0	0	0	0	0	0	0	0	0	0
hsa-miR-520h	0	0	0	0	0	0	0	0	0	0	0	0	0	0	0	0	0	0	0	0	0	0	0	0	0	0	0	0	0	0	0	0	0	0	0	0	0	0	0	0	0	0	0	0	0	0	0	0	0
hsa-miR-521	0	0	0	0	0	0	0	0	0	0	0	0	0	0	0	0	0	0	0	0	0	0	0	0	0	0	0	0	0	0	0	0	0	0	0	0	0	0	0	0	0	0	0	0	0	0	0	0	0
hsa-miR-522-3p	0	0	0	0	0	0	0	0	0	0	0	0	0	0	0	0	0	0	0	0	0	0	0	0	0	0	0	0	0	0	0	0	0	0	0	0	0	0	0	0	0	0	0	0	0	0	0	0	0
hsa-miR-522-5p	0	0	0	0	0	0	0	0	0	0	0	0	0	0	0	0	0	0	0	0	0	0	0	0	0	0	0	0	0	0	0	0	0	0	0	0	0	0	0	0	0	0	0	0	0	0	0	0	0
hsa-miR-523-3p	0	0	0	0	0	0	0	0	0	0	0	0	0	0	0	0	0	0	0	0	0	0	0	0	0	0	0	0	0	0	0	0	0	0	0	0	0	0	0	0	0	0	0	0	0	0	0	0	0
hsa-miR-523-5p	0	0	0	0	0	0	0	0	0	0	0	0	0	0	0	0	0	0	0	0	0	0	0	0	0	0	0	0	0	0	0	0	0	0	0	0	0	0	0	0	0	0	0	0	0	0	0	0	0
hsa-miR-524-3p	0	0	0	0	0	0	0	0	0	0	0	0	0	0	0	0	0	0	0	0	0	0	0	0	0	0	0	0	0	0	0	0	0	0	0	0	0	0	0	0	0	0	0	0	0	0	0	0	0
hsa-miR-524-5p	0	0	0	0	0	0	0	0	0	0	0	0	0	0	0	0	0	0	0	0	0	0	0	0	0	0	0	0	0	0	0	0	0	0	0	0	0	0	0	0	0	0	0	0	0	0	0	0	0
hsa-miR-525-3p	0	0	0	0	0	0	0	0	0	0	0	0	0	0	0	0	0	0	0	0	0	0	0	0	0	0	0	0	0	0	0	0	0	0	0	0	0	0	0	0	0	0	0	0	0	0	0	0	0
hsa-miR-525-5p	0	0	0	0	0	0	0	0	0	0	0	0	0	0	0	0	0	0	0	0	0	0	0	0	0	0	0	0	0	0	0	0	0	0	0	0	0	0	0	0	0	0	0	0	0	0	0	0	0
hsa-miR-526a	0	0	0	0	0	0	0	0	0	0	0	0	0	0	0	0	0	0	0	0	0	0	0	0	0	0	0	0	0	0	0	0	0	0	0	0	0	0	0	0	0	0	0	0	0	0	0	0	0
hsa-miR-526b-3p	0	0	0	0	0	0	0	0	0	0	0	0	0	0	0	0	0	0	0	0	0	0	0	0	0	0	0	0	0	0	0	0	0	0	0	0	0	0	0	0	0	0	0	0	0	0	0	0	0
hsa-miR-526b-5p	0	0	0	0	0	0	0	0	0	0	0	0	0	0	0	0	0	0	0	0	0	0	0	0	0	0	0	0	0	0	0	0	0	0	0	0	0	0	0	0	0	0	0	0	0	0	0	0	0
hsa-miR-527	0	0	0	0	0	0	0	0	0	0	0	0	0	0	0	0	0	0	0	0	0	0	0	0	0	0	0	0	0	0	0	0	0	0	0	0	0	0	0	0	0	0	0	0	0	0	0	0	0
hsa-miR-532-3p	1	2	4	1	0	0	1	1	0	0	0	0	0	5	2	0	4	0	2	0	0	1	1	1	0	0	1	2	3	0	3	0	1	7	1	1	2	3	0	4	2	2	0	2	0	2	3	2	0
hsa-miR-532-5p	717	757	250	222	250	364	348	314	438	231	217	292	256	319	556	265	184	222	286	738	273	220	752	408	751	323	886	1210	2152	422	397	731	203	2007	595	355	1083	1646	163	441	746	669	585	526	324	1121	1206	322	214
hsa-miR-539-3p	1	0	0	0	0	0	0	1	0	0	0	0	0	0	0	0	0	1	0	0	0	0	0	0	2	0	0	0	0	0	0	0	0	0	1	0	1	0	0	0	1	0	0	0	0	0	0	0	1
hsa-miR-539-5p	0	0	0	0	0	0	0	0	0	0	0	0	0	0	1	0	0	0	0	0	0	0	0	0	0	0	0	0	0	0	0	0	0	0	0	0	0	0	0	0	0	0	0	0	0	0	0	0	0
hsa-miR-541-3p	0	0	0	0	0	0	0	0	0	1	1	0	0	1	0	0	0	1	0	0	0	0	1	0	0	0	0	0	0	1	0	0	0	0	0	0	0	0	0	0	0	0	0	0	0	1	0	0	0
hsa-miR-541-5p	0	0	0	0	0	0	0	0	0	0	0	0	0	0	0	0	0	0	0	0	0	0	0	0	0	0	0	0	0	0	0	0	0	0	0	0	0	0	0	0	0	0	0	0	0	0	0	0	0
hsa-miR-542-3p	3	31	11	18	7	2	4	4	45	13	14	14	23	5	37	8	0	15	59	15	31	4	1	20	17	9	5	5	12	27	2	14	54	2	14	8	7	2	1	3	10	41	10	0	5	7	10	3	1
hsa-miR-542-5p	0	0	0	0	0	0	0	0	0	0	0	0	0	0	0	0	0	0	0	0	0	0	0	0	0	0	0	0	0	0	0	0	0	0	0	0	0	0	0	0	0	0	0	0	0	0	0	0	0
hsa-miR-543	12	28	19	28	93	134	87	157	1	12	203	65	24	63	57	24	19	187	28	23	40	34	68	89	120	30	84	68	38	56	7	11	6	17	93	25	39	30	39	152	88	1	46	26	42	48	29	11	129
hsa-miR-544a	0	0	0	0	0	0	0	0	0	0	0	0	0	0	0	0	0	0	0	0	0	0	0	0	0	0	0	0	0	0	0	0	0	0	0	0	0	0	0	0	0	0	0	0	0	0	0	0	0
hsa-miR-544b	0	0	0	0	0	0	0	0	0	0	0	0	0	0	0	0	0	0	0	0	0	0	0	0	0	0	0	0	0	0	0	0	0	0	0	0	0	0	0	0	0	0	0	0	0	0	0	0	0
hsa-miR-545-3p	0	0	0	0	0	0	0	0	0	0	0	0	0	0	0	0	0	0	0	0	0	0	0	0	0	0	0	0	0	0	0	0	0	0	0	0	0	0	0	0	0	0	0	0	0	0	0	0	0
hsa-miR-545-5p	0	0	0	0	0	0	0	0	0	0	0	0	0	0	0	0	0	0	0	0	0	0	0	0	0	0	0	0	0	0	0	0	0	0	0	0	0	0	0	0	0	0	0	0	0	0	0	0	0
hsa-miR-548a-3p	0	0	0	0	0	0	0	0	0	0	0	0	0	0	0	0	0	0	0	0	0	0	0	0	0	0	0	0	0	0	0	0	0	0	0	0	0	0	0	0	0	0	0	0	0	0	0	0	0
hsa-miR-548a-5p	0	0	0	0	0	0	0	0	0	0	0	0	0	0	0	0	0	0	0	0	0	0	0	0	0	0	0	0	0	0	0	0	0	0	0	0	0	0	0	0	0	0	0	0	0	0	0	0	0
hsa-miR-548aa	0	0	0	0	0	0	0	0	0	0	0	0	0	0	0	0	0	0	0	0	0	0	0	0	0	0	0	0	0	0	0	0	0	0	0	0	0	0	0	0	0	0	0	0	0	0	0	0	0
hsa-miR-548ab	0	0	1	0	0	0	0	0	0	0	0	0	0	0	0	0	0	0	0	0	1	0	0	0	0	0	0	0	0	0	0	0	0	0	0	0	0	0	0	0	0	0	0	0	0	0	0	0	0
hsa-miR-548ac	0	0	0	0	0	0	0	0	0	0	0	0	0	0	0	0	1	0	0	0	0	0	0	0	0	0	0	0	0	0	0	0	0	1	0	0	1	1	0	0	0	0	0	0	0	0	1	0	0
hsa-miR-548ad	0	0	0	0	0	0	0	0	0	0	0	0	0	0	0	0	0	0	0	0	0	0	0	0	0	0	0	0	0	0	0	0	0	0	0	0	0	0	0	0	0	0	0	0	0	0	0	0	0
hsa-miR-548ae	0	0	0	0	0	0	0	0	0	0	0	0	0	0	0	0	0	0	0	0	0	0	0	0	0	0	0	0	0	0	0	0	0	0	0	0	0	0	0	0	0	0	0	0	0	0	0	0	0
hsa-miR-548ag	0	0	0	0	0	0	0	0	0	0	0	0	0	0	1	0	0	1	0	0	0	0	0	0	0	0	0	0	0	0	0	0	0	0	0	0	0	0	0	0	0	0	0	0	0	0	0	0	0
hsa-miR-548ah-3p	1	4	1	0	2	1	1	1	1	1	0	0	1	1	0	1	0	0	1	0	0	0	1	0	1	0	1	0	1	0	0	0	0	1	0	0	0	0	0	0	1	0	3	0	0	3	1	0	0
hsa-miR-548ah-5p	0	0	0	0	0	0	0	0	0	0	0	0	0	0	0	0	0	0	0	0	0	0	0	0	0	0	0	0	0	0	0	0	0	0	0	0	0	0	0	0	0	0	0	0	0	0	0	0	0
hsa-miR-548ai	0	0	0	0	0	0	0	0	0	0	0	0	0	0	0	0	0	0	0	0	0	0	0	0	0	0	0	0	0	0	0	0	0	0	0	0	0	0	0	0	0	0	0	0	0	0	0	0	0
hsa-miR-548aj-3p	0	0	0	0	0	0	0	0	0	0	0	0	0	0	0	0	0	0	0	0	0	0	0	0	0	0	0	0	0	0	0	0	0	0	0	0	0	0	0	0	0	0	0	0	0	0	0	0	0
hsa-miR-548aj-5p	0	0	0	0	0	0	0	0	0	0	0	0	0	0	0	0	0	0	0	0	0	0	0	0	0	0	0	0	0	0	0	0	0	0	0	0	0	0	0	0	0	0	0	0	0	0	0	0	0
hsa-miR-548ak	0	0	0	0	0	0	0	0	0	0	0	0	0	0	0	0	0	0	0	0	0	0	0	0	0	0	0	0	0	0	0	0	0	0	0	0	0	0	0	0	0	0	0	0	0	0	0	0	0
hsa-miR-548al	0	0	0	0	0	0	0	0	0	0	0	0	0	0	0	0	0	0	0	0	0	0	0	0	0	0	0	0	0	0	0	0	0	0	0	0	0	0	0	0	0	0	0	0	0	0	0	0	0
hsa-miR-548am-3p	0	0	0	0	0	0	1	0	0	0	0	0	0	0	0	0	0	0	0	0	0	0	0	0	0	0	0	0	0	0	0	0	0	1	0	0	0	0	0	0	0	0	0	0	0	0	0	0	0
hsa-miR-548am-5p	0	0	0	0	0	0	0	0	0	0	0	0	0	0	0	0	0	0	0	0	0	0	0	0	0	0	0	0	0	0	0	0	0	0	0	0	0	0	0	0	0	0	0	0	0	0	0	0	0
hsa-miR-548an	0	0	0	0	0	0	0	0	0	0	0	0	0	0	0	0	0	0	0	0	0	0	0	0	0	0	0	0	0	0	0	0	0	0	0	0	0	0	0	0	0	0	0	0	0	0	0	0	0
hsa-miR-548ao-3p	0	0	0	0	0	0	0	0	0	0	0	0	0	0	0	0	0	0	0	0	0	0	0	0	0	0	0	0	0	0	0	0	0	0	0	0	0	0	0	0	0	0	0	0	0	0	0	0	0
hsa-miR-548ao-5p	0	0	0	0	0	0	0	0	0	0	0	0	0	0	0	0	0	0	0	0	0	0	0	0	0	0	0	0	0	0	0	0	0	0	0	0	0	0	0	0	0	0	0	0	0	0	0	0	0
hsa-miR-548ap-3p	0	0	0	0	0	0	0	0	0	0	0	0	0	0	0	0	0	0	0	0	0	0	0	0	0	0	0	0	0	0	0	0	0	0	0	0	0	0	0	0	0	0	0	0	0	0	0	0	0
hsa-miR-548ap-5p	0	0	0	0	0	0	0	0	0	0	0	0	0	0	0	0	0	0	0	0	0	0	0	0	0	0	0	0	0	0	0	0	0	0	0	0	0	0	0	0	0	0	0	0	0	0	0	0	0
hsa-miR-548aq-3p	0	0	0	0	0	0	1	0	0	0	0	0	0	2	0	0	0	0	0	0	0	0	0	0	0	0	0	0	0	0	0	0	0	0	0	0	0	0	0	0	0	0	0	0	0	0	0	0	0
hsa-miR-548aq-5p	0	0	0	0	0	0	0	0	0	0	0	0	0	0	0	0	0	0	0	0	0	0	0	0	0	0	0	0	0	0	0	0	0	0	0	0	0	0	0	0	0	0	0	0	0	0	0	0	0
hsa-miR-548ar-3p	0	1	0	0	0	0	0	0	0	0	0	0	0	0	0	0	1	0	0	1	0	0	0	0	0	0	0	0	0	0	0	0	0	0	0	0	0	0	0	0	0	0	0	0	0	0	0	0	0
hsa-miR-548ar-5p	0	0	0	0	0	0	0	0	0	0	0	0	0	0	0	0	0	0	0	0	0	0	0	0	0	0	0	0	0	0	0	0	0	0	0	0	0	0	0	0	0	0	0	0	0	0	0	0	0
hsa-miR-548as-3p	0	0	0	0	0	0	0	0	0	0	0	0	0	0	0	0	0	0	0	0	0	0	0	0	0	0	0	0	0	0	0	0	0	0	0	0	0	0	0	0	0	0	0	0	0	0	0	0	0
hsa-miR-548as-5p	0	0	0	0	0	0	0	0	0	0	0	0	0	0	0	0	0	0	0	0	0	0	0	0	0	0	0	0	0	0	0	0	0	0	0	0	0	0	0	0	0	0	0	0	0	0	0	0	0
hsa-miR-548at-3p	0	0	0	0	0	0	0	0	0	0	0	0	0	0	0	0	0	0	0	0	0	0	0	0	0	0	0	0	0	0	0	0	0	0	0	0	0	0	0	0	0	0	0	0	0	0	0	0	0
hsa-miR-548at-5p	0	0	0	0	0	0	0	0	0	0	0	0	0	0	0	0	0	0	0	0	0	0	0	0	0	0	0	0	0	0	0	0	0	0	0	0	0	0	0	0	0	0	0	0	0	0	0	0	0
hsa-miR-548au-3p	0	0	0	0	0	0	0	0	0	0	0	0	0	0	0	0	0	0	0	0	0	0	0	0	0	0	0	0	0	0	0	0	0	0	0	0	0	0	0	0	0	0	0	0	0	0	0	0	0
hsa-miR-548au-5p	0	0	0	0	0	0	0	0	0	0	0	0	0	0	0	0	0	0	0	0	0	0	0	0	0	0	0	0	0	0	0	0	0	0	0	0	0	0	0	0	0	0	0	0	0	0	0	0	0
hsa-miR-548av-3p	0	0	0	0	0	0	0	0	0	0	0	0	0	0	0	0	0	0	0	0	0	0	0	0	0	0	0	0	0	0	0	0	0	0	0	0	0	0	0	0	0	0	0	0	0	0	0	0	0
hsa-miR-548av-5p	0	0	0	0	0	0	0	0	0	0	0	0	0	0	0	0	0	0	0	0	0	0	0	0	0	0	0	0	0	0	0	0	0	0	0	0	0	0	0	0	0	0	0	0	0	0	0	0	0
hsa-miR-548aw	0	0	0	0	0	0	0	0	0	0	0	0	0	0	0	0	0	0	0	0	0	0	0	0	0	0	0	0	0	0	0	0	0	0	0	0	0	0	0	0	0	0	0	0	0	0	0	0	0
hsa-miR-548ax	0	0	0	0	0	0	0	0	0	0	0	0	0	0	0	0	0	0	0	0	0	0	0	0	0	0	0	0	0	0	0	0	0	0	0	0	0	0	0	0	0	0	0	0	0	0	0	0	0
hsa-miR-548ay-3p	0	0	0	0	0	0	0	0	0	0	0	0	0	0	0	0	0	0	0	0	0	0	0	0	0	0	0	0	0	1	0	0	0	0	0	0	0	0	0	0	0	0	0	0	0	0	1	0	0
hsa-miR-548ay-5p	3	4	1	0	0	0	0	0	3	0	0	0	0	0	1	0	0	0	0	0	0	0	0	0	0	0	0	0	1	0	1	0	0	0	1	0	0	0	0	0	0	1	0	0	0	0	2	0	0
hsa-miR-548az-3p	0	0	0	0	0	0	0	0	0	0	0	0	0	0	0	0	0	0	0	0	0	0	0	0	0	0	0	0	0	0	0	0	0	0	0	0	0	0	0	0	0	0	0	0	0	0	0	0	0
hsa-miR-548az-5p	0	2	0	0	0	0	0	1	0	0	0	0	0	0	0	1	1	0	0	2	0	0	0	0	0	0	0	0	0	0	0	1	0	0	0	0	0	0	0	0	0	0	0	0	0	0	0	0	0
hsa-miR-548b-3p	0	0	0	0	0	0	0	0	0	0	0	0	0	0	0	0	0	0	0	0	0	0	0	0	0	0	0	0	0	0	0	0	0	0	0	0	0	0	0	0	0	0	0	0	0	0	0	0	0
hsa-miR-548b-5p	0	0	0	0	0	0	0	0	0	0	0	0	0	0	0	0	0	0	0	0	0	0	0	0	0	0	0	0	0	0	0	0	0	0	0	0	0	0	0	0	0	0	0	0	0	0	0	0	0
hsa-miR-548ba	0	0	0	0	0	0	0	0	0	0	0	0	0	0	0	0	0	0	0	0	0	0	0	0	0	0	0	0	0	0	0	0	0	0	0	0	0	0	0	0	0	0	0	0	0	0	0	0	0
hsa-miR-548c-3p	0	0	0	0	0	0	0	0	0	0	0	0	0	0	0	0	0	0	0	0	0	0	0	0	0	0	0	0	0	0	0	0	0	0	0	0	0	0	0	0	0	0	0	0	0	0	0	0	0
hsa-miR-548c-5p	0	0	0	0	0	0	0	0	0	0	0	0	0	0	0	0	0	0	0	0	0	0	0	0	0	0	0	0	0	0	0	0	0	0	0	0	0	0	0	0	0	0	0	0	0	0	0	0	0
hsa-miR-548d-3p	0	0	0	0	0	0	0	0	0	0	0	0	0	0	0	0	0	0	0	0	0	0	0	0	0	0	0	0	0	0	0	0	0	0	0	0	0	0	0	0	0	0	0	0	0	0	0	0	0
hsa-miR-548d-5p	1	2	1	0	0	1	0	1	4	0	0	0	0	0	1	0	0	1	1	1	0	0	0	0	1	0	1	0	1	0	0	0	0	0	0	0	1	0	0	0	0	1	0	0	0	0	2	0	0
hsa-miR-548e-3p	7	12	5	5	6	5	3	3	14	2	5	7	7	2	11	7	3	4	10	4	7	4	5	5	9	1	4	5	5	11	2	6	14	2	4	4	4	6	1	2	6	9	6	1	2	4	6	2	0
hsa-miR-548e-5p	0	0	0	0	0	0	0	0	0	0	0	0	0	0	0	0	0	0	0	0	1	0	0	0	0	0	0	0	0	0	0	0	0	0	0	0	0	0	0	0	0	0	0	0	0	0	0	0	0
hsa-miR-548f-3p	1	1	0	1	0	0	0	0	1	0	0	0	1	0	1	0	0	0	1	0	10	0	0	1	0	0	0	0	0	0	0	1	0	0	0	0	0	0	0	0	0	0	0	0	0	0	0	0	0
hsa-miR-548f-5p	0	0	0	0	0	0	0	0	0	0	0	0	0	0	0	0	0	0	0	0	0	0	0	0	0	0	0	0	0	0	0	0	0	0	0	0	0	0	0	0	0	0	0	0	0	0	0	0	0
hsa-miR-548g-3p	0	0	0	0	0	0	0	0	0	0	0	0	0	0	0	0	0	0	0	0	0	0	0	0	0	0	0	0	0	0	0	0	0	0	0	0	0	0	0	0	0	0	0	0	0	0	0	0	0
hsa-miR-548g-5p	0	0	0	0	0	0	0	0	0	0	0	0	0	0	0	0	0	0	0	0	0	0	0	0	0	0	0	0	0	0	0	0	0	0	0	0	0	0	0	0	0	0	0	0	0	0	0	0	0
hsa-miR-548h-3p	0	0	0	0	0	0	0	0	0	0	0	0	0	0	0	0	0	0	0	0	0	0	0	0	0	0	0	0	0	0	0	0	0	0	0	0	0	0	0	0	0	0	0	0	0	0	0	0	0
hsa-miR-548h-5p	0	0	0	0	0	0	0	0	0	0	0	0	0	0	0	0	0	0	0	0	0	0	0	0	0	0	0	0	0	0	0	0	0	0	0	0	0	0	0	0	0	0	0	0	0	0	0	0	0
hsa-miR-548i	0	0	0	0	0	0	0	0	0	0	0	0	0	0	0	0	1	0	0	0	0	0	0	0	0	0	0	0	0	0	0	0	0	0	0	0	0	0	0	0	0	0	0	0	0	0	0	0	0
hsa-miR-548j-3p	1	0	0	0	1	1	1	1	3	0	1	2	0	0	4	2	0	0	3	5	0	0	1	1	0	1	0	0	0	0	0	0	1	0	0	0	0	0	0	0	1	0	0	0	0	0	0	0	0
hsa-miR-548j-5p	1	6	2	2	8	7	3	16	4	8	8	13	3	4	5	5	0	4	5	15	2	6	6	4	5	3	2	2	2	2	1	6	3	0	4	7	3	5	2	1	9	1	6	1	2	1	1	2	3
hsa-miR-548k	3	3	2	1	0	1	2	1	4	1	1	2	2	2	2	1	0	0	4	1	6	0	0	5	0	1	1	1	2	2	0	1	1	3	1	1	1	1	0	1	0	1	0	0	0	1	5	0	0
hsa-miR-548l	0	2	1	0	0	0	1	0	1	1	0	0	1	0	0	0	1	1	2	0	1	0	1	0	2	0	1	1	3	0	1	1	0	2	1	0	2	1	0	0	1	2	0	0	0	1	2	0	1
hsa-miR-548m	0	0	0	0	0	0	0	0	0	0	0	0	0	0	0	0	0	0	0	0	0	0	0	0	0	0	0	0	0	0	0	0	0	0	0	0	0	0	0	0	0	0	0	0	0	0	0	0	0
hsa-miR-548n	0	0	0	0	1	0	0	0	0	0	0	0	0	0	1	0	1	0	0	0	0	0	0	0	0	0	0	0	1	0	0	0	1	0	1	0	1	0	0	0	0	0	0	0	0	0	0	0	0
hsa-miR-548o-3p	16	27	9	14	7	5	10	6	9	10	8	16	10	2	18	14	5	4	12	9	7	8	17	9	15	0	7	9	9	4	1	7	5	5	4	4	9	7	0	2	8	11	6	2	4	13	12	2	1
hsa-miR-548o-5p	0	0	0	0	0	0	0	0	0	0	0	0	0	0	0	0	0	0	0	0	0	0	0	0	0	0	0	0	0	0	0	0	0	0	0	0	0	0	0	0	0	0	0	0	0	0	0	0	0
hsa-miR-548p	0	0	0	0	0	0	0	0	0	0	0	0	0	0	0	0	0	0	0	0	0	0	0	0	0	0	0	0	0	0	0	0	0	0	0	0	0	0	0	0	0	0	0	0	0	0	0	0	0
hsa-miR-548q	0	0	0	0	0	0	0	0	0	0	0	0	0	0	0	0	1	0	0	0	0	0	0	0	0	0	0	0	0	0	0	0	0	0	0	0	0	0	0	0	0	0	0	0	0	1	0	0	0
hsa-miR-548s	0	0	0	0	0	0	0	0	0	0	0	0	0	0	0	0	0	0	0	0	0	0	0	0	0	0	0	0	0	0	0	0	0	0	0	0	0	0	0	0	0	0	0	0	0	0	0	0	0
hsa-miR-548t-3p	0	0	0	0	0	0	0	0	0	0	0	0	0	0	0	0	0	0	0	0	0	0	0	0	0	0	0	0	0	0	0	0	0	0	0	0	0	0	0	0	0	0	0	0	0	0	0	0	0
hsa-miR-548t-5p	0	0	0	0	0	0	0	0	0	0	0	0	0	0	0	0	0	0	0	0	0	0	0	0	0	0	0	0	0	0	0	0	0	0	0	0	0	0	0	0	0	0	0	0	0	0	0	0	0
hsa-miR-548u	0	2	0	0	1	0	0	1	1	0	0	0	0	0	1	0	1	0	0	1	0	0	0	0	1	0	0	0	0	1	0	0	1	0	0	0	0	0	0	0	0	1	0	0	0	0	0	0	0
hsa-miR-548v	0	0	0	0	0	0	0	0	0	0	0	0	0	0	0	0	0	0	0	0	0	0	0	0	0	0	0	0	0	0	0	0	0	0	0	0	0	0	0	0	0	0	0	0	0	0	0	0	0
hsa-miR-548w	0	0	0	0	0	0	0	0	0	0	0	0	0	0	0	0	0	0	0	0	0	0	0	0	0	0	0	0	0	0	0	0	0	0	0	0	0	0	0	0	0	0	0	0	0	0	0	0	0
hsa-miR-548x-3p	0	0	0	0	0	0	0	0	0	0	0	0	0	0	0	0	0	0	0	0	0	0	0	0	0	0	0	0	0	0	0	0	0	0	0	0	0	0	0	0	0	0	0	0	0	0	0	0	0
hsa-miR-548x-5p	0	0	0	0	0	0	0	0	0	0	0	0	0	0	0	0	0	0	0	0	0	0	0	0	0	0	0	0	0	0	0	0	0	0	0	0	0	0	0	0	0	0	0	0	0	0	0	0	0
hsa-miR-548y	0	0	0	0	0	0	0	0	0	0	0	0	0	0	0	0	0	0	0	0	0	0	0	0	0	0	0	0	0	0	0	0	0	0	0	0	0	0	0	0	0	0	0	0	0	0	0	0	0
hsa-miR-548z	0	0	0	0	0	0	0	0	0	0	0	0	0	0	0	0	0	0	0	0	0	0	0	0	0	0	0	0	0	0	0	0	0	0	0	0	0	0	0	0	0	0	0	0	0	0	0	0	0
hsa-miR-549a	0	0	0	0	0	0	0	1	0	0	0	0	0	0	0	0	0	0	0	0	0	0	0	0	0	0	0	0	0	0	0	0	0	0	0	0	0	0	0	0	0	0	0	0	0	0	0	0	0
hsa-miR-550a-3-5p	2	4	3	3	1	1	7	3	1	3	2	1	6	2	6	3	3	6	6	23	3	3	3	5	5	4	2	8	8	5	3	2	2	9	5	2	3	5	1	11	3	7	4	1	1	1	9	1	3
hsa-miR-550a-3p	0	0	0	0	0	0	0	0	0	0	0	0	0	0	0	0	0	0	0	0	0	0	0	0	0	0	0	0	0	0	0	0	0	0	0	0	0	0	0	0	0	0	0	0	0	0	0	0	0
hsa-miR-550a-5p	15	33	15	11	16	13	18	13	7	19	9	11	17	17	29	14	11	14	20	67	20	8	7	18	14	8	6	24	38	22	18	14	9	34	15	16	11	13	4	13	13	21	10	5	5	17	27	4	10
hsa-miR-550b-2-5p	0	0	0	0	0	0	0	0	0	0	0	0	0	0	0	0	0	0	0	0	0	0	0	0	0	0	0	0	0	0	0	0	0	0	0	0	0	0	0	0	0	0	0	0	0	0	0	0	0
hsa-miR-550b-3p	0	0	0	0	0	0	0	0	0	0	0	0	0	0	0	0	0	0	0	0	0	0	0	0	0	0	0	0	0	0	0	0	0	0	0	0	0	0	0	0	0	0	0	0	0	0	0	0	0
hsa-miR-551a	1	0	0	0	0	0	0	0	0	0	0	0	0	0	0	0	0	1	1	0	0	0	0	0	0	0	0	0	0	1	0	0	0	0	0	1	0	0	0	0	0	2	0	0	0	0	0	0	0
hsa-miR-551b-3p	0	0	0	0	0	0	0	0	0	0	0	0	0	0	0	0	0	0	0	0	0	0	0	0	0	0	0	0	0	0	0	0	0	0	0	0	0	0	0	0	0	0	0	0	0	0	0	0	0
hsa-miR-551b-5p	0	0	0	0	0	0	0	0	0	0	0	0	0	0	0	0	0	0	0	0	0	0	0	0	0	0	0	0	0	0	0	0	0	0	0	0	0	0	0	0	0	0	0	0	0	0	0	0	0
hsa-miR-552-3p	0	1	0	0	1	0	0	0	0	0	1	0	0	0	1	0	0	0	0	0	0	0	0	0	2	0	0	0	0	0	0	0	0	0	0	0	0	0	0	0	0	0	0	0	0	0	0	0	0
hsa-miR-552-5p	0	0	0	0	0	0	0	0	0	0	0	0	0	0	0	0	0	0	0	0	0	0	0	0	0	0	0	0	0	0	0	0	0	0	0	0	0	0	0	0	0	0	0	0	0	0	0	0	0
hsa-miR-553	0	0	0	0	0	0	0	0	0	0	0	0	0	0	0	0	0	0	0	0	0	0	0	0	0	0	0	0	0	0	0	0	0	0	0	0	0	0	0	0	0	0	0	0	0	0	0	0	0
hsa-miR-554	0	0	0	0	0	0	0	0	0	0	0	0	0	0	0	0	0	0	0	0	0	0	0	0	0	0	0	0	0	0	0	0	0	0	0	0	0	0	0	0	0	0	0	0	0	0	0	0	0
hsa-miR-555	0	0	0	0	0	0	0	0	0	0	0	0	0	0	0	0	0	0	0	0	0	0	0	0	0	0	0	0	0	0	0	0	0	0	0	0	0	0	0	0	0	0	0	0	0	0	0	0	0
hsa-miR-556-3p	0	0	0	0	0	0	0	0	0	0	0	0	0	0	0	0	0	0	0	0	0	0	0	0	0	0	0	0	0	0	0	0	0	0	0	0	0	1	0	0	0	0	0	0	0	0	0	0	0
hsa-miR-556-5p	0	0	1	1	3	0	0	0	0	0	1	1	0	0	0	1	0	0	0	0	0	0	1	0	1	0	0	0	0	0	0	1	0	0	0	0	0	0	0	1	1	0	0	0	0	0	0	0	0
hsa-miR-557	0	0	0	0	0	0	0	0	0	0	0	0	0	0	0	0	0	0	0	0	0	0	0	0	0	0	0	0	0	0	0	0	0	0	0	0	0	0	0	0	0	0	0	0	0	0	0	0	0
hsa-miR-558	0	0	0	0	0	0	0	0	0	0	0	0	0	0	0	0	0	0	0	0	0	0	0	0	0	0	0	0	0	0	0	0	0	0	0	0	0	0	0	0	0	0	0	0	0	0	0	0	0
hsa-miR-559	0	0	0	0	0	0	0	0	0	0	0	0	0	0	0	0	0	0	0	0	0	0	0	0	0	0	0	0	0	0	0	0	0	0	0	0	0	0	0	0	0	0	0	0	0	0	0	0	0
hsa-miR-561-3p	0	0	0	0	0	0	0	0	0	0	0	0	0	0	0	0	0	0	0	0	0	0	0	0	0	0	0	0	0	0	0	0	0	0	0	0	0	0	0	0	0	0	0	0	0	0	0	0	0
hsa-miR-561-5p	0	0	0	0	0	0	0	0	1	0	0	0	0	0	1	0	0	0	0	0	0	0	0	0	0	0	0	0	0	0	0	0	0	0	0	0	0	0	0	0	0	0	0	0	0	0	0	0	0
hsa-miR-562	0	0	0	0	0	0	0	0	0	0	0	0	0	0	0	0	0	0	0	0	0	0	0	0	0	0	0	0	0	0	0	0	0	0	0	0	0	0	0	0	0	0	0	0	0	0	0	0	0
hsa-miR-563	0	0	0	0	0	0	0	0	0	0	0	0	0	0	0	0	0	0	0	0	0	0	0	0	0	0	0	0	0	0	0	0	0	0	0	0	0	0	0	0	0	0	0	0	0	0	0	0	0
hsa-miR-564	0	0	0	0	0	0	0	0	0	0	0	0	0	0	0	0	0	0	0	0	0	0	0	0	0	0	0	0	0	0	0	0	0	0	0	0	0	0	0	0	0	0	0	0	0	0	0	0	0
hsa-miR-566	0	0	0	0	0	0	0	0	0	0	0	0	0	0	0	0	0	0	0	0	0	0	0	0	0	0	0	0	0	0	0	0	0	0	0	0	0	0	0	0	0	0	0	0	0	0	0	0	0
hsa-miR-567	0	0	0	0	0	0	0	0	0	0	0	0	0	0	0	0	0	0	0	0	0	0	0	0	0	0	0	0	0	0	0	0	0	0	0	0	0	0	0	0	0	0	0	0	0	0	0	0	0
hsa-miR-568	0	0	0	0	0	0	0	0	0	0	0	0	0	0	0	0	0	0	0	0	0	0	0	0	0	0	0	0	0	0	0	0	0	0	0	0	0	0	0	0	0	0	0	0	0	0	0	0	0
hsa-miR-569	0	0	0	0	0	0	0	0	0	0	0	0	0	0	0	0	0	0	0	0	0	0	0	0	0	0	0	0	0	0	0	0	0	0	0	0	0	0	0	0	0	0	0	0	0	0	0	0	0
hsa-miR-570-3p	1	0	0	0	0	0	0	0	0	0	0	0	1	0	0	0	0	0	0	2	0	0	0	0	0	0	0	0	0	0	0	0	0	0	0	0	0	0	0	0	0	0	0	0	0	0	0	0	0
hsa-miR-570-5p	0	0	0	0	0	0	0	0	0	0	0	0	0	0	0	0	0	0	0	0	0	0	0	0	0	0	0	0	0	0	0	0	0	0	0	0	0	0	0	0	0	0	0	0	0	0	0	0	0
hsa-miR-571	0	0	0	0	0	0	0	0	0	0	0	0	0	0	0	0	0	0	0	0	0	0	0	0	0	0	0	0	0	0	0	0	0	0	0	0	0	0	0	0	0	0	0	0	0	0	0	0	0
hsa-miR-572	0	0	0	0	0	0	0	0	0	0	0	0	0	0	0	0	0	0	0	0	0	0	0	0	0	0	0	0	0	0	0	0	0	0	0	0	0	0	0	0	0	0	0	0	0	0	0	0	0
hsa-miR-573	0	0	0	0	0	0	0	0	0	0	0	0	0	0	0	0	0	0	0	0	0	0	0	0	0	0	0	0	0	0	0	0	0	0	0	0	0	0	0	0	0	0	0	0	0	0	0	0	0
hsa-miR-574-3p	3	1	2	2	3	4	1	1	0	3	3	6	4	0	6	4	1	5	5	3	5	1	3	2	2	1	3	7	4	3	2	2	3	5	2	0	6	0	1	2	3	1	3	3	2	3	2	0	7
hsa-miR-574-5p	9	8	6	58	12	17	33	74	2	11	9	12	30	134	17	53	351	7	7	107	24	20	111	35	44	88	40	91	118	37	53	12	35	155	25	60	66	64	14	81	76	21	53	28	32	75	88	44	25
hsa-miR-575	0	0	0	0	0	0	0	0	0	0	0	0	0	0	0	0	0	0	0	0	0	0	0	0	0	0	0	0	0	0	0	0	0	0	0	0	0	0	0	0	0	0	0	0	0	0	0	0	0
hsa-miR-576-3p	49	124	181	32	21	22	42	27	145	36	47	33	72	45	66	45	36	31	106	48	115	11	21	18	26	17	13	14	49	26	28	37	72	13	105	22	17	20	4	13	22	49	17	4	7	8	83	26	3
hsa-miR-576-5p	1	3	1	0	0	2	4	4	2	0	0	3	0	3	5	5	3	2	2	2	2	1	9	1	1	3	4	8	7	1	1	2	0	17	2	3	2	12	0	3	6	1	2	3	1	6	12	2	0
hsa-miR-577	0	0	0	0	0	0	0	0	0	0	0	0	0	0	0	0	0	0	0	0	0	0	0	0	0	0	0	0	0	0	0	0	0	0	0	0	0	0	0	0	0	0	0	0	0	0	0	0	0
hsa-miR-578	0	0	0	0	0	0	0	0	0	0	0	0	0	0	0	0	0	0	0	0	0	0	0	0	0	0	0	0	0	0	0	0	0	0	0	0	0	0	0	0	0	0	0	0	0	0	0	0	0
hsa-miR-579-3p	0	0	0	0	0	1	0	0	0	0	0	0	0	2	0	0	0	0	0	1	0	0	0	0	0	0	0	0	0	0	0	0	0	0	0	0	0	0	0	0	0	0	0	0	0	0	0	0	0
hsa-miR-579-5p	0	0	0	0	0	0	0	0	0	0	0	0	0	0	0	0	0	0	0	0	0	0	0	0	0	0	0	0	1	0	0	0	0	0	0	0	0	0	0	0	0	0	0	0	0	0	0	0	0
hsa-miR-580-3p	0	0	0	0	0	0	0	0	0	0	0	0	0	0	0	0	0	0	0	0	0	0	0	0	0	0	0	0	0	0	0	0	0	0	0	0	0	0	0	0	0	0	0	0	0	0	0	0	0
hsa-miR-580-5p	0	0	0	0	0	0	0	0	0	0	0	0	0	0	0	0	0	0	0	0	0	0	0	0	0	0	0	0	0	0	0	0	0	0	0	0	0	0	0	0	0	0	0	0	0	0	0	0	0
hsa-miR-581	0	1	1	1	2	2	0	0	1	2	0	1	1	0	0	0	0	0	3	2	0	1	0	1	1	0	0	0	0	0	0	1	0	0	0	1	1	0	0	0	0	0	0	0	0	2	1	0	0
hsa-miR-582-3p	22	166	28	92	12	13	7	0	37	12	19	24	22	5	46	29	2	29	50	18	95	16	24	53	53	6	20	21	12	31	7	12	75	33	11	38	18	10	8	7	36	88	27	4	17	15	20	6	3
hsa-miR-582-5p	0	0	0	0	0	0	0	0	0	0	0	0	0	0	0	0	0	0	0	0	0	0	0	0	0	0	0	0	0	0	0	0	0	0	0	0	0	0	0	0	0	0	0	0	0	0	0	0	0
hsa-miR-583	0	0	0	0	0	0	0	0	0	0	0	0	0	0	0	0	0	0	0	0	0	0	0	0	0	0	0	0	0	0	0	0	0	0	0	0	0	0	0	0	0	0	0	0	0	0	0	0	0
hsa-miR-584-3p	0	0	0	0	0	0	0	0	0	0	0	0	0	0	0	0	0	0	0	0	0	0	0	0	0	0	0	0	0	0	0	0	0	1	0	0	0	0	0	0	0	0	0	0	0	0	0	0	0
hsa-miR-584-5p	825	412	484	277	778	698	473	364	297	778	649	1108	487	476	462	531	673	667	381	591	292	417	464	244	509	589	503	448	553	351	549	517	234	658	653	225	386	440	292	596	476	116	403	325	461	290	537	313	750
hsa-miR-585-3p	0	0	0	0	0	0	0	0	0	0	0	0	0	0	0	0	0	0	0	0	0	0	0	0	0	0	0	0	0	0	0	0	0	0	0	0	0	0	0	0	0	0	0	0	0	0	0	0	0
hsa-miR-585-5p	0	0	0	0	0	0	0	0	0	0	0	0	0	0	0	0	0	0	0	0	0	0	0	0	0	0	0	0	0	0	0	0	0	0	0	0	0	0	0	0	0	0	0	0	0	0	0	0	0
hsa-miR-586	0	0	0	0	0	0	0	0	0	0	0	0	0	0	0	0	0	0	0	0	0	0	0	0	0	0	0	0	0	0	0	0	0	0	0	0	0	0	0	0	0	0	0	0	0	0	0	0	0
hsa-miR-587	0	0	0	0	0	0	0	0	0	0	0	0	0	0	0	0	0	0	0	0	0	0	0	0	0	0	0	0	0	0	0	0	0	0	0	0	0	0	0	0	0	0	0	0	0	0	0	0	0
hsa-miR-588	0	0	0	0	0	0	0	0	0	0	0	0	0	0	0	0	0	0	0	0	0	0	0	0	0	0	0	0	0	0	0	0	0	0	0	0	0	0	0	0	0	0	0	0	0	0	0	0	0
hsa-miR-589-3p	0	0	0	0	0	0	0	0	0	0	0	0	0	0	1	0	1	0	0	0	0	0	0	0	0	0	0	0	0	0	0	0	0	1	0	0	0	0	0	0	0	0	0	0	0	0	0	0	0
hsa-miR-589-5p	55	26	10	27	26	21	21	14	59	20	23	26	21	18	32	21	17	18	39	22	20	12	18	24	19	16	16	13	25	37	17	16	30	41	21	16	13	18	11	24	15	34	19	11	11	19	30	16	6
hsa-miR-590-3p	0	0	0	0	0	0	0	0	1	0	0	0	0	0	2	0	0	0	0	0	0	0	0	0	0	1	0	0	0	0	0	0	0	1	0	0	0	1	0	0	0	0	0	0	0	0	1	0	0
hsa-miR-590-5p	0	0	0	0	0	0	0	0	0	0	0	0	0	0	0	0	0	0	0	0	0	0	0	0	0	0	0	0	0	0	0	0	0	0	0	0	0	0	0	0	0	0	0	0	0	0	0	0	0
hsa-miR-591	0	0	0	0	0	0	0	0	0	0	0	0	0	0	0	0	0	0	0	0	0	0	0	0	0	0	0	0	0	0	0	0	0	0	0	0	0	0	0	0	0	0	0	0	0	0	0	0	0
hsa-miR-592	0	0	0	0	0	0	0	0	0	0	0	0	0	0	0	0	0	0	0	0	0	0	0	0	0	0	0	0	0	0	0	0	0	0	0	0	0	0	0	0	0	0	0	0	0	0	0	0	0
hsa-miR-593-3p	0	0	0	0	0	0	0	0	0	0	0	0	0	0	0	0	0	0	0	0	0	0	0	0	0	0	0	0	0	0	0	0	0	0	0	0	0	0	0	0	0	0	0	0	0	0	0	0	0
hsa-miR-593-5p	0	0	0	0	0	0	0	0	0	0	0	0	0	0	0	0	0	0	0	0	0	0	0	0	0	0	0	0	0	0	0	0	0	0	0	0	0	0	0	0	0	0	0	0	0	0	0	0	0
hsa-miR-595	0	0	0	0	0	0	0	0	0	0	0	0	0	0	0	0	0	0	0	0	0	0	0	0	0	0	0	0	0	0	0	0	0	0	0	0	0	0	0	0	0	0	0	0	0	0	0	0	0
hsa-miR-596	0	0	0	0	0	0	0	0	0	0	0	0	0	0	0	0	0	0	0	0	0	0	0	0	0	0	0	0	0	0	0	0	0	0	0	0	0	0	0	0	0	0	0	0	0	0	0	0	0
hsa-miR-597-3p	0	0	0	0	0	0	0	0	0	0	0	1	0	0	0	1	0	0	0	1	0	0	0	0	0	0	0	0	1	0	0	0	0	0	0	0	0	0	0	0	0	0	0	0	0	0	0	0	0
hsa-miR-597-5p	0	0	0	0	0	0	0	0	0	0	0	0	0	0	0	0	0	0	0	0	0	0	0	0	0	0	0	0	0	0	0	0	0	0	0	0	0	0	0	0	0	0	0	0	0	0	0	0	0
hsa-miR-598-3p	15	4	2	2	2	3	4	0	6	1	1	3	1	0	6	2	1	0	3	3	2	0	6	3	2	2	2	5	6	0	0	1	1	15	1	4	5	9	0	2	3	3	2	3	0	2	5	2	0
hsa-miR-598-5p	0	0	0	0	0	0	0	0	0	0	0	0	0	0	0	0	0	0	0	0	0	0	0	0	0	0	0	0	0	0	0	0	0	0	0	0	0	0	0	0	0	0	0	0	0	0	0	0	0
hsa-miR-599	0	0	0	0	0	0	0	0	0	0	0	0	0	0	0	0	0	0	0	0	0	0	0	0	0	0	0	0	0	0	0	0	0	0	0	0	0	0	0	0	0	0	0	0	0	0	0	0	0
hsa-miR-600	0	0	0	0	0	0	0	0	0	0	0	0	0	0	0	0	0	0	0	0	0	0	0	0	0	0	0	0	0	0	0	0	0	0	0	0	0	0	0	0	0	0	0	0	0	0	0	0	0
hsa-miR-601	0	0	0	0	0	0	0	0	0	0	0	0	0	0	0	0	0	0	0	0	0	0	0	0	0	0	0	0	0	0	0	0	0	0	0	0	0	0	0	0	0	0	0	0	0	0	0	0	0
hsa-miR-602	0	0	0	0	0	0	0	0	0	0	0	0	0	0	0	0	0	0	0	0	0	0	0	0	0	0	0	0	0	0	0	0	0	0	0	0	0	0	0	0	0	0	0	0	0	0	0	0	0
hsa-miR-603	0	0	0	0	0	0	0	0	0	0	0	0	0	0	0	0	0	0	0	0	0	0	0	0	0	0	0	0	0	0	0	0	0	0	0	0	0	0	0	0	0	0	0	0	0	0	0	0	0
hsa-miR-604	0	0	0	0	0	0	0	0	0	0	0	0	0	0	0	0	0	0	0	0	0	0	0	0	0	0	0	0	0	0	0	0	0	0	0	0	0	0	0	0	0	0	0	0	0	0	0	0	0
hsa-miR-605-3p	0	1	0	0	0	0	0	1	0	2	0	1	1	0	1	0	0	0	0	0	0	0	0	0	0	0	1	0	0	0	0	1	0	0	0	0	0	0	0	0	1	0	0	0	0	0	0	0	0
hsa-miR-605-5p	0	0	0	0	0	0	0	0	0	0	0	0	0	0	0	0	0	0	0	0	0	0	0	0	0	0	0	0	0	0	0	0	0	0	0	0	0	0	0	0	0	0	0	0	0	0	0	0	0
hsa-miR-606	0	0	0	0	0	0	0	0	0	0	0	0	0	0	0	0	0	0	0	0	0	0	0	0	0	0	0	0	0	0	0	0	0	0	0	0	0	0	0	0	0	0	0	0	0	0	0	0	0
hsa-miR-607	0	0	0	0	0	0	0	0	0	0	0	0	0	0	0	0	0	0	0	0	0	0	0	0	0	0	0	0	0	0	0	0	0	0	0	0	0	0	0	0	0	0	0	0	0	0	0	0	0
hsa-miR-608	0	0	0	0	0	0	0	0	0	0	0	0	0	0	0	0	0	0	0	0	0	0	0	0	0	0	0	0	0	0	0	0	0	0	0	0	0	0	0	0	0	0	0	0	0	0	0	0	0
hsa-miR-609	0	0	0	0	0	0	0	0	0	0	0	0	0	0	0	0	0	0	0	0	0	0	0	0	0	0	0	0	0	0	0	0	0	0	0	0	0	0	0	0	0	0	0	0	0	0	0	0	0
hsa-miR-610	0	1	0	0	0	0	0	0	0	0	1	0	0	0	1	0	2	0	0	0	0	0	0	0	0	0	0	0	2	0	1	0	0	3	1	1	1	0	0	0	0	1	0	1	0	0	1	0	0
hsa-miR-611	0	0	0	0	0	0	0	0	0	0	0	0	0	0	0	0	0	0	0	0	0	0	0	0	0	0	0	0	0	0	0	0	0	0	0	0	0	0	0	0	0	0	0	0	0	0	0	0	0
hsa-miR-612	0	0	0	0	0	0	0	0	0	0	0	0	0	0	0	0	0	0	0	0	0	0	0	0	0	0	0	0	0	0	0	0	0	0	0	0	0	0	0	0	0	0	0	0	0	0	0	0	0
hsa-miR-613	0	0	0	0	0	0	0	0	0	0	0	0	0	0	0	0	0	0	0	0	0	0	0	0	0	0	0	0	0	0	0	0	0	0	0	0	0	0	0	0	0	0	0	0	0	0	0	0	0
hsa-miR-614	0	0	0	0	0	0	0	0	0	0	0	0	0	0	0	0	0	0	0	0	0	0	0	0	0	0	0	0	0	0	0	0	0	0	0	0	0	0	0	0	0	0	0	0	0	0	0	0	0
hsa-miR-615-3p	0	0	0	0	1	2	1	1	0	0	1	0	0	0	0	2	0	0	10	1	0	0	0	0	0	0	0	2	0	0	0	3	0	0	0	0	0	0	0	0	1	0	0	0	0	8	0	1	1
hsa-miR-615-5p	0	0	0	0	0	0	0	0	0	0	0	0	0	0	0	0	0	0	0	0	0	0	0	0	0	0	0	0	0	0	0	0	0	0	0	0	0	0	0	0	0	0	0	0	0	0	0	0	0
hsa-miR-616-3p	0	0	0	0	1	0	1	1	0	0	0	0	0	0	1	1	0	0	0	1	0	0	0	0	0	0	0	0	0	1	0	0	0	0	0	0	0	0	0	0	0	0	0	0	0	0	0	0	0
hsa-miR-616-5p	0	0	0	0	0	0	0	0	0	0	0	0	0	0	0	0	0	0	0	0	0	0	0	0	0	0	0	0	0	0	0	0	0	0	0	0	0	0	0	0	0	0	0	0	0	0	0	0	0
hsa-miR-617	0	0	0	0	0	0	0	0	0	0	0	0	0	0	0	0	0	0	0	0	0	0	0	0	0	0	0	0	0	0	0	0	0	0	0	0	0	0	0	0	0	0	0	0	0	0	0	0	0
hsa-miR-618	2	8	6	4	0	3	4	2	2	4	2	2	7	0	5	7	0	3	9	3	12	1	5	16	6	3	4	6	1	3	0	1	5	1	2	4	0	1	3	0	3	7	3	0	1	2	1	1	0
hsa-miR-619-3p	0	0	0	0	0	0	0	0	0	0	0	0	0	0	0	0	0	0	0	0	0	0	0	0	0	0	0	0	0	0	0	0	0	0	0	0	0	0	0	0	0	0	0	0	0	0	0	0	0
hsa-miR-619-5p	0	0	0	1	1	0	0	3	0	1	0	3	4	0	0	0	2	0	0	1	0	0	0	1	0	0	0	0	0	2	0	0	1	0	1	0	0	0	0	1	0	1	0	0	0	0	0	0	1
hsa-miR-620	0	0	0	0	0	0	0	0	0	0	0	0	0	0	0	0	0	0	0	0	0	0	0	0	0	0	0	0	0	0	0	0	0	0	0	0	0	0	0	0	0	0	0	0	0	0	0	0	0
hsa-miR-621	0	0	0	0	0	0	0	0	0	0	0	0	0	0	0	0	0	0	0	0	0	0	0	0	0	0	0	0	0	0	0	0	0	0	0	0	0	0	0	0	0	0	0	0	0	0	0	0	0
hsa-miR-622	0	0	0	0	0	0	0	0	0	0	0	0	0	0	0	0	0	0	0	0	0	0	0	0	0	0	0	0	0	0	0	0	0	0	0	0	0	0	0	0	0	0	0	0	0	0	0	0	1
hsa-miR-623	0	0	0	0	0	0	0	0	0	0	0	0	0	0	0	0	0	0	0	0	0	0	0	0	0	0	0	0	0	0	0	0	0	0	0	0	0	0	0	0	0	0	0	0	0	0	0	0	0
hsa-miR-624-3p	0	0	0	0	0	0	0	0	0	0	0	0	0	0	0	0	0	0	0	0	0	0	0	0	0	0	0	0	0	0	0	0	0	0	0	0	0	0	0	0	0	0	0	0	0	0	0	0	0
hsa-miR-624-5p	0	0	1	1	0	0	0	0	0	0	0	0	1	0	0	0	0	0	0	0	0	0	0	0	0	0	0	1	0	0	0	0	1	2	0	0	0	0	0	0	0	0	0	0	0	0	3	0	0
hsa-miR-625-3p	65	81	31	58	86	79	53	96	82	66	61	444	56	64	110	112	106	90	76	183	89	50	166	76	65	63	68	83	51	106	44	57	44	65	102	108	60	56	77	68	223	21	107	55	43	53	63	46	78
hsa-miR-625-5p	3	1	2	0	0	0	0	0	1	0	0	1	1	0	1	0	1	1	1	4	0	0	1	0	2	0	1	0	0	0	1	1	0	0	1	1	0	0	0	0	1	0	0	0	0	0	2	0	0
hsa-miR-626	0	0	0	0	0	0	0	0	0	0	0	0	0	0	0	0	0	0	0	0	0	0	0	0	0	0	0	0	0	0	0	0	0	0	0	0	0	0	0	0	0	0	0	0	0	0	0	0	0
hsa-miR-627-3p	1	0	0	0	0	0	0	0	1	0	0	0	0	0	0	0	0	0	0	0	0	0	0	0	0	0	0	0	0	1	0	0	0	0	0	0	1	0	0	0	0	0	0	0	0	0	0	0	0
hsa-miR-627-5p	0	0	0	0	0	0	1	0	1	1	0	0	0	0	1	0	1	0	2	2	4	0	0	1	0	0	0	0	0	1	0	0	1	0	1	0	0	0	0	0	0	0	0	0	0	0	1	0	0
hsa-miR-628-3p	12	12	8	9	17	27	10	8	5	12	11	17	17	3	12	15	9	9	14	18	10	15	19	14	31	3	13	12	9	17	10	6	12	10	10	17	9	10	5	7	19	13	13	9	8	12	12	3	8
hsa-miR-628-5p	0	0	1	1	1	1	0	0	2	0	1	1	1	0	3	1	0	1	1	0	3	0	1	0	1	0	0	0	0	0	0	0	1	0	0	0	0	0	0	0	0	0	0	0	0	0	0	0	0
hsa-miR-629-3p	0	0	0	0	0	0	0	0	0	0	0	0	0	0	1	0	0	0	0	0	0	0	0	0	0	0	0	0	0	0	0	0	0	0	0	0	0	0	0	0	0	0	0	0	0	0	0	0	0
hsa-miR-629-5p	868	1032	1435	1052	512	351	767	947	1584	661	611	556	1344	1557	856	884	1208	812	1415	2240	2550	485	436	988	468	559	412	476	954	1153	824	859	1129	701	2595	492	517	452	277	682	519	725	458	263	207	224	1462	842	444
hsa-miR-630	0	0	0	0	0	0	0	0	0	0	0	0	0	0	0	0	0	0	0	0	0	0	0	0	0	0	0	0	0	0	0	0	0	0	0	0	0	0	0	0	0	0	0	0	0	0	0	0	0
hsa-miR-631	0	0	0	0	0	0	0	0	0	0	0	0	0	0	0	0	0	0	0	0	0	0	0	0	0	0	0	0	0	0	0	0	0	0	0	0	0	0	0	0	0	0	0	0	0	0	0	0	0
hsa-miR-632	0	0	0	0	0	0	0	0	0	0	0	0	0	0	0	0	0	0	0	0	0	0	0	0	0	0	0	0	0	0	0	0	0	0	0	0	0	0	0	0	0	0	0	0	0	0	0	0	0
hsa-miR-633	0	0	0	0	0	0	0	0	0	0	0	0	0	0	0	0	0	0	0	0	0	0	0	0	0	0	0	0	0	0	0	0	0	0	0	0	0	0	0	0	0	0	0	0	0	0	0	0	0
hsa-miR-634	0	0	0	0	0	0	0	0	0	0	0	0	0	0	0	0	0	0	0	0	0	0	0	0	0	0	0	0	0	0	0	0	0	0	0	0	0	0	0	0	0	0	0	0	0	0	0	0	0
hsa-miR-635	0	0	0	0	0	0	0	0	0	0	0	0	0	0	0	0	0	0	0	0	0	0	0	0	0	0	0	0	0	0	0	0	0	0	0	0	0	0	0	0	0	0	0	0	0	0	0	0	0
hsa-miR-636	1	0	0	0	0	0	1	1	0	0	0	0	0	2	0	0	1	0	0	0	0	0	0	0	0	0	0	0	1	0	0	0	0	1	0	0	0	2	0	0	0	0	0	0	0	0	1	0	0
hsa-miR-637	0	0	0	0	0	0	0	0	0	0	0	0	0	0	0	0	0	0	0	0	0	0	0	0	0	0	0	0	0	0	0	0	0	0	0	0	0	0	0	0	0	0	0	0	0	0	0	0	0
hsa-miR-638	0	0	0	0	0	0	0	0	0	0	0	0	0	0	0	0	0	0	0	0	0	0	0	0	0	0	0	0	0	0	0	0	0	0	0	0	0	0	0	0	0	0	0	0	0	0	0	0	0
hsa-miR-639	0	0	0	0	0	0	0	0	0	0	0	0	0	0	0	0	0	0	0	0	0	0	0	0	0	0	0	0	0	0	0	0	0	0	0	0	0	0	0	0	0	0	0	0	0	0	0	0	0
hsa-miR-640	0	0	0	0	0	0	0	0	0	0	0	0	0	0	0	0	0	0	0	0	0	0	0	0	0	0	0	0	0	0	0	0	0	0	0	0	0	0	0	0	0	0	0	0	0	0	0	0	0
hsa-miR-641	1	2	0	4	1	2	5	4	2	5	8	7	1	2	3	8	0	3	2	2	1	3	1	3	2	0	1	1	1	1	0	2	1	0	3	1	1	0	0	2	8	1	2	0	2	1	0	0	0
hsa-miR-642a-3p	4	1	6	2	1	3	2	27	1	2	2	0	3	2	0	7	0	6	5	9	18	6	10	40	14	13	2	6	3	4	0	3	5	2	2	6	0	2	4	4	5	2	7	2	3	18	3	6	2
hsa-miR-642a-5p	0	0	0	0	0	0	0	0	0	0	0	0	0	0	0	0	0	0	0	0	0	0	0	0	0	0	0	0	0	0	0	0	0	0	0	0	0	0	0	0	0	0	0	0	0	0	0	0	0
hsa-miR-642b-3p	0	0	0	0	0	0	0	0	0	0	0	0	0	0	0	0	0	0	0	0	0	0	0	0	0	0	0	0	0	0	0	0	0	0	0	0	0	0	0	0	0	0	0	0	0	0	0	0	0
hsa-miR-642b-5p	0	0	0	0	0	0	0	0	0	0	0	0	0	0	0	0	0	0	0	0	0	0	0	0	0	0	0	0	0	0	0	0	0	0	0	0	0	0	0	0	0	0	0	0	0	0	0	0	0
hsa-miR-643	0	0	0	0	0	0	0	0	0	0	0	0	0	0	0	0	0	0	0	0	0	0	0	0	0	0	0	0	0	0	0	0	0	0	0	0	0	0	0	0	0	0	0	0	0	0	0	0	0
hsa-miR-644a	0	0	0	0	0	0	0	0	0	0	0	0	0	0	0	0	0	0	0	0	0	0	0	0	0	0	0	0	0	0	0	0	0	0	0	0	0	0	0	0	0	0	0	0	0	0	0	0	0
hsa-miR-645	0	0	0	0	0	0	0	0	0	0	0	0	0	0	0	0	0	0	0	0	0	0	0	0	0	0	0	0	0	0	0	0	0	0	0	0	0	0	0	0	0	0	0	0	0	0	0	0	0
hsa-miR-646	0	0	0	0	0	0	0	0	0	0	0	0	0	0	0	0	0	0	0	0	0	0	0	0	0	0	0	0	0	0	0	0	0	0	0	0	0	0	0	0	0	0	0	0	0	0	0	0	0
hsa-miR-647	0	0	0	0	0	0	0	0	0	0	0	0	0	0	0	0	0	0	0	0	0	0	0	0	0	0	0	0	0	0	0	0	0	0	0	0	0	0	0	0	0	0	0	0	0	0	0	0	0
hsa-miR-648	0	0	0	0	0	0	0	0	0	0	0	0	0	0	0	0	0	0	0	0	0	0	0	0	0	0	0	0	0	0	0	0	0	0	0	0	0	0	0	0	0	0	0	0	0	0	0	0	0
hsa-miR-649	0	0	0	0	0	0	0	0	0	0	0	0	0	0	0	0	0	0	0	0	0	0	0	0	0	0	0	0	0	0	0	0	0	0	0	0	0	0	0	0	0	0	0	0	0	0	0	0	0
hsa-miR-650	0	0	0	0	0	0	0	0	0	0	0	0	0	0	0	0	0	0	0	0	0	0	0	0	0	0	0	0	0	0	0	0	0	0	0	0	0	0	0	0	0	0	0	0	0	0	0	0	0
hsa-miR-651-3p	0	0	0	0	0	0	0	0	0	0	0	0	0	0	0	0	0	0	0	0	0	0	0	0	0	0	0	0	0	0	0	0	0	0	0	0	0	0	0	0	0	0	0	0	0	0	0	0	0
hsa-miR-651-5p	8	19	24	23	12	3	10	7	50	11	22	6	25	20	14	18	12	10	23	36	32	6	7	16	17	19	12	7	15	12	7	13	36	19	61	13	8	13	2	12	11	22	7	3	4	12	50	11	2
hsa-miR-652-3p	117	48	38	57	28	25	24	14	268	33	30	51	43	23	60	30	41	50	54	43	41	34	51	45	29	33	35	41	43	35	33	28	55	80	83	44	17	73	11	45	34	86	28	18	14	9	73	40	14
hsa-miR-652-5p	0	0	0	0	0	0	0	0	0	0	0	0	0	0	0	0	0	0	0	0	0	0	0	0	0	0	0	0	0	0	0	0	0	0	0	0	0	0	0	0	0	0	0	0	0	0	0	0	0
hsa-miR-653-3p	0	0	0	0	0	0	0	0	0	0	0	0	0	0	0	0	0	0	0	0	0	0	0	0	0	0	0	0	0	0	0	0	0	0	0	0	0	0	0	0	0	0	0	0	0	0	0	0	0
hsa-miR-653-5p	0	0	0	0	0	0	0	0	0	0	0	0	0	0	0	0	0	0	0	0	0	0	0	0	0	0	0	0	0	0	0	0	0	0	0	0	0	0	0	0	0	0	0	0	0	0	0	0	0
hsa-miR-654-3p	50	20	13	26	38	43	31	27	3	20	94	20	12	40	39	9	9	73	21	5	23	22	63	27	111	9	69	51	20	41	10	5	10	28	37	24	30	24	12	54	50	2	27	16	23	15	27	7	50
hsa-miR-654-5p	11	7	0	12	13	29	12	26	0	7	43	5	7	9	12	4	0	21	6	2	4	5	13	9	41	3	19	13	8	16	2	2	4	5	11	11	20	12	11	24	18	1	13	5	14	3	8	2	36
hsa-miR-655-3p	0	0	0	0	0	1	0	0	0	0	0	0	0	0	0	0	0	0	0	0	0	0	0	0	0	0	0	0	0	0	0	0	0	0	0	0	0	0	0	0	0	0	0	0	0	0	0	0	0
hsa-miR-655-5p	0	0	0	0	0	0	0	0	0	0	0	0	0	0	0	0	0	0	0	0	0	0	0	0	0	0	0	0	0	0	0	0	0	0	0	0	0	0	0	0	0	0	0	0	0	0	0	0	0
hsa-miR-656-3p	1	0	0	0	0	0	0	0	0	0	1	0	0	0	0	0	0	2	0	0	0	0	0	0	0	0	0	0	0	0	0	0	0	0	0	0	0	0	0	1	0	0	0	0	0	0	0	0	0
hsa-miR-656-5p	0	0	0	0	0	0	0	0	0	0	0	0	0	0	0	0	0	0	0	0	0	0	0	0	0	0	0	0	0	0	0	0	0	0	0	0	0	0	0	0	0	0	0	0	0	0	0	0	0
hsa-miR-657	0	0	0	0	0	0	0	0	0	0	0	0	0	0	0	0	0	0	0	0	0	0	0	0	0	0	0	0	0	0	0	0	0	0	0	0	0	0	0	0	0	0	0	0	0	0	0	0	0
hsa-miR-658	1	0	1	3	2	1	1	4	1	2	2	1	5	1	1	1	2	1	14	12	75	1	1	31	1	17	0	0	1	21	1	2	2	1	5	6	2	0	1	4	2	9	4	0	0	1	0	4	1
hsa-miR-659-3p	0	0	0	0	0	0	0	0	0	0	0	0	0	0	0	0	0	0	0	0	0	0	0	0	0	0	0	0	0	0	0	0	0	0	0	0	0	0	0	0	0	0	0	0	0	0	0	0	0
hsa-miR-659-5p	1	2	2	2	1	1	1	3	2	1	2	0	0	0	1	0	0	1	1	0	0	1	2	2	0	1	0	2	3	2	0	0	0	5	0	1	1	5	0	0	0	0	2	2	0	2	1	0	0
hsa-miR-660-3p	0	0	0	0	0	0	0	0	2	0	0	0	0	0	0	0	0	0	0	0	0	0	0	0	0	0	0	0	0	0	0	0	0	1	1	0	0	0	0	0	0	1	0	0	0	0	0	0	0
hsa-miR-660-5p	20	27	17	32	14	8	17	14	56	4	11	11	17	17	22	18	18	13	36	31	17	12	21	21	22	20	17	11	44	17	30	15	29	40	22	8	19	22	1	10	17	32	13	8	5	15	55	14	1
hsa-miR-661	0	0	0	0	0	0	0	0	0	0	0	0	0	0	0	0	0	0	0	0	0	0	0	0	0	0	0	0	0	0	0	0	0	0	0	0	0	0	0	0	0	0	0	0	0	0	0	0	0
hsa-miR-662	0	0	0	0	0	0	0	0	0	0	0	0	0	0	0	0	0	0	0	0	0	0	0	0	0	0	0	0	0	0	0	0	0	0	0	0	0	0	0	0	0	0	0	0	0	0	0	0	0
hsa-miR-663a	0	0	0	0	0	0	0	0	0	0	0	0	0	0	0	0	1	0	0	0	0	0	0	0	0	0	0	0	0	0	0	0	0	0	0	0	0	0	0	0	0	0	0	0	0	0	0	0	0
hsa-miR-663b	0	0	0	0	0	0	0	0	0	0	0	0	0	0	0	0	0	0	0	0	0	0	0	0	0	0	0	0	0	0	0	0	0	0	0	0	0	0	0	0	0	0	0	0	0	0	0	0	0
hsa-miR-664a-3p	0	0	0	0	0	1	0	0	0	0	0	1	0	0	1	0	1	0	0	0	0	0	1	0	0	0	0	0	1	0	0	0	0	1	0	0	0	0	0	0	0	0	0	0	0	0	0	0	0
hsa-miR-664a-5p	90	64	66	24	80	85	52	80	21	68	82	69	92	18	58	75	43	43	37	54	46	52	45	58	56	38	38	35	31	79	27	34	69	30	39	42	19	21	30	49	37	46	27	19	40	31	47	17	69
hsa-miR-664b-3p	0	0	0	0	0	0	0	0	0	0	0	0	0	0	0	0	0	0	0	0	0	0	0	0	0	0	0	0	0	0	0	0	0	0	0	0	0	0	0	0	0	0	0	0	0	0	0	0	0
hsa-miR-664b-5p	2	0	0	0	1	0	0	1	0	0	0	1	0	5	0	0	1	0	0	0	0	0	0	1	0	3	2	1	1	1	0	0	0	2	0	1	3	0	0	0	0	1	0	0	0	2	0	0	0
hsa-miR-665	0	0	0	0	0	0	0	2	0	0	0	0	0	0	0	0	0	0	5	1	0	0	0	0	0	2	0	0	0	0	0	0	0	0	0	0	0	0	0	0	0	0	0	0	0	0	1	0	0
hsa-miR-668-3p	0	0	0	0	0	0	0	0	0	0	0	0	0	1	0	0	0	1	0	0	0	0	0	0	0	0	0	0	0	0	0	0	0	0	0	0	0	0	0	0	0	0	0	0	0	0	0	0	0
hsa-miR-668-5p	0	0	0	0	0	0	0	0	0	0	0	0	0	0	0	0	0	0	0	0	0	0	0	0	0	0	0	0	0	0	0	0	0	0	0	0	0	0	0	0	0	0	0	0	0	0	0	0	0
hsa-miR-670-3p	0	0	0	0	0	0	0	0	0	0	0	0	0	0	0	0	0	0	0	0	0	0	0	0	0	0	0	0	0	0	0	0	0	0	0	0	0	0	0	0	0	0	0	0	0	0	0	0	0
hsa-miR-670-5p	0	0	0	0	0	0	0	0	0	0	0	0	0	0	0	0	0	0	0	0	0	0	0	0	0	0	0	0	0	0	0	0	0	0	0	0	0	0	0	0	0	0	0	0	0	0	0	0	0
hsa-miR-671-3p	9	9	9	4	27	40	19	36	2	15	22	25	9	12	14	20	3	15	8	16	12	17	9	12	19	10	9	10	4	10	2	15	1	5	5	2	8	7	8	7	18	0	17	11	13	26	3	4	29
hsa-miR-671-5p	1	0	1	0	1	0	0	38	1	0	0	1	0	0	0	4	0	0	18	0	2	0	0	0	0	5	0	0	0	0	0	4	1	0	0	1	1	0	0	0	0	0	0	0	0	0	1	2	0
hsa-miR-675-3p	0	0	0	0	0	0	0	0	0	0	0	0	0	0	0	0	0	0	0	0	0	0	0	0	0	0	0	0	0	0	0	0	0	0	0	0	0	0	0	0	0	0	0	0	0	0	0	0	0
hsa-miR-675-5p	0	0	0	0	0	0	0	0	0	0	0	0	0	0	0	39	0	0	2	0	0	0	0	0	0	0	0	0	0	0	0	4	0	0	0	2	0	0	0	0	0	0	0	0	0	0	0	0	0
hsa-miR-676-3p	1	0	1	0	0	0	0	0	1	0	0	0	0	0	0	0	0	0	0	0	0	0	0	0	1	0	0	0	0	0	0	0	0	0	0	0	0	0	0	0	0	1	0	0	0	1	0	0	0
hsa-miR-676-5p	0	0	0	0	0	0	0	0	0	0	0	0	0	0	0	0	0	0	0	0	0	0	0	0	0	0	0	0	0	0	0	0	0	0	0	0	0	0	0	0	0	0	0	0	0	0	1	0	0
hsa-miR-708-3p	6	8	3	0	1	6	2	20	0	4	2	3	5	0	2	4	0	6	5	2	7	2	4	1	1	23	3	1	2	2	0	21	5	4	1	12	5	3	1	1	1	0	8	0	2	6	3	4	0
hsa-miR-708-5p	0	0	0	0	0	0	0	0	0	0	0	0	0	0	0	0	0	0	0	0	0	0	0	0	0	0	0	0	0	0	0	0	0	0	0	0	0	0	0	0	0	0	0	0	0	0	0	0	0
hsa-miR-711	0	0	0	0	0	0	0	0	0	0	0	0	0	0	0	0	0	0	0	0	0	0	0	0	0	0	0	0	0	0	0	0	0	0	0	0	0	0	0	0	0	0	0	0	0	0	0	0	0
hsa-miR-718	0	0	0	0	0	0	0	0	0	0	0	0	0	0	0	0	0	0	0	0	0	0	0	0	0	0	0	0	0	0	0	0	0	0	0	0	0	0	0	0	0	0	0	0	0	0	0	0	0
hsa-miR-744-3p	0	0	0	0	0	1	0	0	0	0	1	0	0	0	0	0	0	0	0	0	0	0	1	0	1	0	0	0	0	0	0	0	0	1	0	0	0	0	0	0	0	0	0	0	0	0	0	0	0
hsa-miR-744-5p	240	319	151	155	513	742	373	439	47	362	369	431	271	154	293	286	85	233	190	285	90	282	351	225	423	136	297	285	198	333	109	146	144	215	178	223	190	173	129	209	323	137	294	253	263	322	92	110	319
hsa-miR-758-3p	0	1	0	1	2	1	1	1	0	0	6	2	1	0	3	0	0	3	0	0	0	2	1	2	6	0	1	0	0	1	0	0	0	0	2	1	1	0	1	1	2	0	1	0	0	0	0	0	2
hsa-miR-758-5p	0	0	0	0	0	0	0	0	0	0	0	0	0	0	0	0	0	0	0	0	0	0	0	0	0	0	0	0	0	0	0	0	0	0	0	0	0	0	0	0	0	0	0	0	0	0	0	0	0
hsa-miR-759	0	0	0	0	0	0	0	0	0	0	0	0	0	0	0	0	0	0	0	0	0	0	0	0	0	0	0	0	0	0	0	0	0	0	0	0	0	0	0	0	0	0	0	0	0	0	0	0	0
hsa-miR-760	40	7	14	15	26	31	11	73	6	22	14	32	10	11	9	26	9	17	16	28	17	9	21	12	16	53	16	9	6	23	7	18	9	11	6	18	8	7	10	7	8	2	11	8	7	11	7	9	20
hsa-miR-761	0	0	0	0	0	0	0	0	0	0	0	0	0	0	0	0	0	0	0	0	0	0	0	0	0	0	0	0	0	0	0	0	0	0	0	0	0	0	0	0	0	0	0	0	0	0	0	0	0
hsa-miR-762	0	0	0	0	0	0	0	0	0	0	0	0	0	0	0	0	0	0	0	0	0	0	0	0	0	0	0	0	0	0	0	0	0	0	0	0	0	0	0	0	0	0	0	0	0	0	0	0	0
hsa-miR-764	0	0	0	0	0	0	0	0	0	0	0	0	0	0	0	0	0	0	0	0	0	0	0	0	0	0	0	0	0	0	0	0	0	0	0	0	0	0	0	0	0	0	0	0	0	0	0	0	0
hsa-miR-765	0	0	0	0	0	0	0	0	0	0	0	0	0	0	0	0	0	0	0	1	0	0	0	0	0	0	0	0	0	0	0	0	0	0	0	0	0	0	0	0	0	0	0	0	0	0	0	0	0
hsa-miR-766-3p	0	0	0	0	0	0	0	0	0	0	0	1	0	0	1	0	0	0	0	1	0	0	0	2	1	0	0	0	0	0	0	0	0	0	0	0	0	0	0	0	0	0	0	0	0	0	0	0	0
hsa-miR-766-5p	6	2	6	5	8	5	3	8	1	6	3	3	2	1	3	3	3	1	0	8	3	7	10	7	8	5	5	4	3	5	3	1	6	8	2	1	8	1	3	3	7	3	8	5	2	3	3	2	5
hsa-miR-767-3p	0	0	0	0	0	0	0	0	0	0	0	0	0	0	0	0	0	0	0	0	0	0	0	0	0	0	0	0	0	0	0	0	0	0	0	0	0	0	0	0	0	0	0	0	0	0	0	0	0
hsa-miR-767-5p	0	0	0	0	0	0	0	0	0	0	0	0	0	0	0	0	0	0	0	0	0	0	0	0	0	0	0	0	0	0	0	0	0	0	0	0	0	0	0	0	0	0	0	0	0	0	0	0	0
hsa-miR-769-3p	0	0	0	0	0	0	0	1	0	0	0	0	0	0	0	0	0	0	0	0	0	0	0	0	0	0	0	0	0	0	0	0	0	0	0	0	0	0	0	0	0	0	0	0	0	0	0	0	0
hsa-miR-769-5p	40	24	6	5	8	13	8	16	6	6	12	15	6	1	24	9	5	10	11	11	7	8	21	10	39	10	18	24	16	14	5	15	12	21	9	10	17	12	8	9	26	21	33	11	14	31	9	4	10
hsa-miR-770-5p	0	0	0	0	0	0	0	0	0	0	0	0	0	0	0	0	0	0	0	0	0	0	0	0	0	0	0	0	0	0	0	0	0	0	0	0	0	0	0	0	0	0	0	0	0	0	0	0	0
hsa-miR-802	0	0	0	0	0	0	0	0	0	0	0	0	0	0	0	0	0	0	0	0	0	0	0	0	0	0	0	0	0	0	0	0	0	0	0	0	0	0	0	0	0	0	0	0	0	0	0	0	0
hsa-miR-873-3p	0	0	2	2	2	2	0	0	1	0	0	1	3	0	0	1	0	3	1	3	2	2	0	5	0	2	0	0	1	2	0	0	1	1	0	3	0	0	2	0	0	0	0	1	1	0	1	0	3
hsa-miR-873-5p	2	0	9	1	1	1	0	0	8	0	2	0	2	0	2	2	1	4	0	4	2	2	1	5	2	1	1	0	1	4	0	0	3	0	1	0	2	1	0	0	2	1	2	0	1	2	2	0	1
hsa-miR-874-3p	5	0	1	1	0	1	0	3	4	2	3	4	1	1	1	1	7	2	2	6	5	1	5	1	4	5	4	4	2	2	1	3	2	6	3	7	4	3	0	3	5	2	4	1	2	6	4	1	3
hsa-miR-874-5p	0	0	0	0	0	0	0	0	0	0	0	0	0	0	0	0	0	0	0	0	0	0	0	0	0	0	0	0	0	0	0	0	0	0	0	0	0	0	0	0	0	0	0	0	0	0	0	0	0
hsa-miR-875-3p	0	0	0	0	0	0	0	0	0	0	0	0	0	0	0	0	0	0	0	0	0	0	0	0	0	0	0	0	0	0	0	0	0	0	0	0	0	0	0	0	0	0	0	0	0	0	0	0	0
hsa-miR-875-5p	0	0	0	0	0	0	0	0	0	0	0	0	0	0	0	0	0	0	0	0	0	0	0	0	0	0	0	0	0	0	0	0	0	0	0	0	0	0	0	0	0	0	0	0	0	0	0	0	0
hsa-miR-876-3p	0	0	0	0	0	0	0	0	0	0	0	0	0	0	0	0	0	0	0	0	0	0	0	0	0	0	0	0	0	0	0	0	0	0	0	0	0	0	0	0	0	0	0	0	0	0	0	0	0
hsa-miR-876-5p	0	0	0	0	0	0	0	0	0	0	0	0	0	0	0	0	0	0	0	0	0	0	0	0	0	0	0	0	0	0	0	0	0	0	0	0	0	0	0	0	0	0	0	0	0	0	0	0	0
hsa-miR-877-3p	0	0	0	0	0	0	0	0	0	0	0	0	0	0	0	0	0	0	0	0	0	0	0	0	0	0	0	0	0	0	0	0	0	0	0	0	0	0	0	0	0	0	0	0	0	0	0	0	0
hsa-miR-877-5p	0	0	1	2	0	1	0	3	0	0	2	0	2	20	0	0	18	1	0	7	0	1	3	0	0	1	0	2	3	2	1	1	1	5	0	3	1	1	0	3	0	1	1	0	0	2	1	0	2
hsa-miR-885-3p	0	0	0	0	0	1	0	0	0	0	1	0	0	1	0	0	1	0	0	0	1	0	5	0	1	0	5	0	3	0	0	0	0	0	0	0	2	0	0	1	4	0	6	0	4	1	0	0	0
hsa-miR-885-5p	0	0	0	0	0	0	0	2	0	0	0	0	0	0	0	0	0	0	1	0	0	0	1	0	0	0	3	0	0	0	0	0	0	1	0	0	1	0	0	0	6	0	3	0	1	1	2	0	0
hsa-miR-887-3p	0	0	0	0	0	0	0	0	0	0	0	0	0	0	0	0	0	0	0	0	0	0	0	0	0	0	0	0	0	0	0	0	0	0	0	0	0	0	0	0	0	0	0	0	0	0	0	0	0
hsa-miR-887-5p	0	0	0	0	0	0	0	0	0	0	0	0	0	0	0	0	0	0	0	0	0	0	0	0	0	0	0	0	0	0	0	0	0	0	0	0	0	0	0	0	0	0	0	0	0	0	0	0	0
hsa-miR-888-3p	0	0	0	0	0	0	0	0	0	0	0	0	0	0	0	0	0	0	0	0	0	0	0	0	0	0	0	0	0	0	0	0	0	0	0	0	0	0	0	0	0	0	0	0	0	0	0	0	0
hsa-miR-888-5p	0	0	0	0	0	0	0	0	0	0	0	0	0	0	0	0	0	0	0	0	0	0	0	0	0	0	0	0	0	0	0	0	0	0	0	0	0	0	0	0	0	0	0	0	0	0	0	0	0
hsa-miR-889-3p	11	7	1	11	11	14	6	7	1	2	43	7	13	19	18	6	0	25	4	2	4	5	16	14	40	2	19	15	8	12	2	1	8	5	22	2	11	14	9	23	26	0	7	3	8	4	15	2	26
hsa-miR-889-5p	0	0	0	0	0	0	0	0	0	0	0	0	0	0	0	0	0	0	0	0	0	0	0	0	0	0	0	0	0	0	0	0	0	0	0	0	0	0	0	0	0	0	0	0	0	0	0	0	0
hsa-miR-890	0	0	0	0	0	0	0	0	0	0	0	0	0	0	0	0	0	0	0	0	0	0	0	0	0	0	0	0	0	0	0	0	0	0	0	0	0	0	0	0	0	0	0	0	0	0	0	0	0
hsa-miR-891a-3p	0	0	0	0	0	0	0	0	0	0	0	0	0	0	0	0	0	0	0	0	0	0	0	0	0	0	0	0	0	0	0	0	0	0	0	0	0	0	0	0	0	0	0	0	0	0	0	0	0
hsa-miR-891a-5p	0	0	0	0	0	0	0	0	0	0	0	0	0	0	0	0	0	0	12	0	0	0	0	0	0	0	0	0	0	0	0	0	0	0	0	0	0	0	0	0	0	0	0	0	0	0	0	0	0
hsa-miR-891b	0	0	0	0	0	0	0	0	0	0	0	0	0	0	0	0	0	0	0	0	0	0	0	0	0	0	0	0	0	0	0	0	0	0	0	0	0	0	0	0	0	0	0	0	0	0	0	0	0
hsa-miR-892a	0	0	0	0	0	0	0	0	0	0	0	0	0	0	0	0	0	0	0	0	0	0	0	0	0	0	0	0	0	0	0	0	0	0	0	0	0	0	0	0	0	0	0	0	0	0	0	0	0
hsa-miR-892b	0	0	0	0	0	0	0	0	0	0	0	0	0	0	0	0	0	0	0	0	0	0	0	0	0	0	0	0	0	0	0	0	0	0	0	0	0	0	0	0	0	0	0	0	0	0	0	0	0
hsa-miR-892c-3p	0	0	0	0	0	0	0	0	0	0	0	0	0	0	0	0	0	0	0	0	0	0	0	0	0	0	0	0	0	0	0	0	0	0	0	0	0	0	0	0	0	0	0	0	0	0	0	0	0
hsa-miR-892c-5p	0	0	0	0	0	0	0	0	0	0	0	0	0	0	0	0	0	0	0	0	0	0	0	0	0	0	0	0	0	0	0	0	0	0	0	0	0	0	0	0	0	0	0	0	0	0	0	0	0
hsa-miR-920	0	0	0	0	0	0	0	0	0	0	0	0	0	0	0	0	0	0	0	0	0	0	0	0	0	0	0	0	0	0	0	0	0	0	0	0	0	0	0	0	0	0	0	0	0	0	0	0	0
hsa-miR-921	0	0	0	0	0	0	0	0	0	0	0	0	0	0	0	0	0	0	0	0	0	0	0	0	0	0	0	0	0	0	0	0	0	0	0	0	0	0	0	0	0	0	0	0	0	0	0	0	0
hsa-miR-922	0	0	0	0	0	0	0	0	0	0	0	0	0	0	0	0	0	0	0	0	0	0	0	0	0	0	0	0	0	0	0	0	0	0	0	0	0	0	0	0	0	0	0	0	0	0	0	0	0
hsa-miR-924	0	0	0	0	0	0	0	0	0	0	0	0	0	0	0	0	0	0	0	0	0	0	0	0	0	0	0	0	0	0	0	0	0	0	0	0	0	0	0	0	0	0	0	0	0	0	0	0	0
hsa-miR-933	0	0	0	0	0	0	0	0	0	1	0	0	0	0	0	0	0	0	2	1	0	0	0	0	0	0	0	1	0	0	0	0	0	0	0	0	0	0	0	0	0	0	0	0	0	0	0	0	0
hsa-miR-934	0	0	0	0	0	0	0	0	0	0	0	0	0	0	0	1	0	0	0	0	0	0	0	0	0	0	0	0	0	0	0	0	0	0	0	0	0	0	0	0	0	0	0	0	0	0	0	0	0
hsa-miR-935	0	0	0	0	0	0	0	0	0	0	0	0	0	0	0	0	0	0	0	0	0	0	0	0	0	0	0	0	0	0	0	0	0	0	0	0	0	0	0	0	0	0	0	0	0	0	0	0	0
hsa-miR-936	0	0	0	0	0	0	0	0	0	0	0	0	0	0	0	0	0	0	0	0	0	0	0	0	0	0	0	0	0	0	0	0	0	0	0	0	0	0	0	0	0	0	0	0	0	0	0	0	0
hsa-miR-937-3p	0	1	0	0	1	1	1	0	0	1	0	0	0	0	0	1	1	0	1	0	0	0	0	0	0	0	0	0	2	0	0	0	0	0	0	0	0	2	0	0	0	0	1	0	0	0	1	0	0
hsa-miR-937-5p	0	0	0	0	0	0	0	0	0	0	0	0	0	0	0	0	0	0	0	0	0	0	0	0	0	0	0	0	0	0	0	0	0	0	0	0	0	0	0	0	0	0	0	0	0	0	0	0	0
hsa-miR-938	0	0	0	0	0	0	0	0	0	0	0	0	0	0	0	0	0	0	0	0	0	0	0	0	0	0	0	0	0	0	0	0	0	0	0	0	0	0	0	0	0	0	0	0	0	0	0	0	0
hsa-miR-939-3p	0	0	0	0	0	0	0	0	0	0	0	0	0	0	0	0	0	0	0	0	0	0	0	0	0	0	0	0	0	0	0	0	0	0	0	0	0	0	0	0	0	0	0	0	0	0	0	0	0
hsa-miR-939-5p	0	0	0	0	0	0	1	0	0	0	0	0	0	2	0	0	5	0	0	3	0	0	1	0	1	0	1	2	4	0	0	0	0	14	1	0	1	8	0	3	0	1	2	2	0	0	2	3	0
hsa-miR-940	0	0	0	0	0	0	0	0	0	0	0	0	0	0	0	0	0	0	0	0	0	0	0	0	0	0	0	0	0	0	0	0	0	0	0	0	0	0	0	0	0	0	0	0	0	0	0	0	0
hsa-miR-941	99	180	82	86	98	132	147	107	69	93	96	98	107	106	135	94	124	69	103	100	138	23	135	165	164	62	96	232	78	164	64	76	54	285	51	111	142	243	51	50	131	145	144	32	52	153	125	53	59
hsa-miR-942-3p	0	1	2	1	0	0	1	0	2	0	0	0	2	1	1	0	1	1	1	3	4	0	1	1	1	2	0	1	1	0	1	1	1	1	2	2	1	0	0	2	0	1	0	0	0	0	1	0	0
hsa-miR-942-5p	20	21	16	12	8	10	14	9	26	7	9	11	6	25	11	10	27	9	16	37	13	9	21	12	13	7	11	29	44	10	12	10	6	43	23	11	11	27	3	20	18	9	12	18	5	10	33	9	9
hsa-miR-943	0	0	0	0	0	0	0	0	0	0	0	0	0	0	0	0	1	0	0	0	0	0	0	0	0	0	0	0	0	0	0	0	0	0	0	0	0	0	0	1	0	0	1	0	0	0	0	0	0
hsa-miR-944	0	0	0	0	0	0	0	0	0	0	0	0	0	0	0	0	0	0	0	0	0	0	0	0	0	0	0	0	0	0	0	0	0	0	0	0	0	0	0	0	0	0	0	0	0	0	0	0	0
hsa-miR-1178-3p	0	0	0	0	0	0	0	0	0	0	0	0	0	0	0	0	0	0	0	0	0	0	0	0	0	0	0	0	0	0	0	0	0	0	0	0	0	0	0	0	0	0	0	0	0	0	0	0	0
hsa-miR-1178-5p	0	0	0	0	0	0	0	0	0	0	0	0	0	0	0	0	0	0	0	0	0	0	0	0	0	0	0	0	0	0	0	0	0	0	0	0	0	0	0	0	0	0	0	0	0	0	0	0	0
hsa-miR-1179	0	0	0	0	0	0	0	0	0	0	0	0	0	0	0	0	0	0	0	0	0	0	0	0	0	0	0	0	0	0	0	0	0	0	0	0	0	0	0	0	0	0	0	0	0	0	0	0	0
hsa-miR-1180-3p	41	73	90	58	23	25	98	77	46	33	34	23	45	190	41	63	656	27	57	190	58	58	82	36	27	83	73	118	202	15	96	21	20	234	166	37	68	126	13	92	60	40	20	98	9	41	221	88	30
hsa-miR-1180-5p	0	0	0	0	0	0	0	0	0	0	0	0	0	0	0	0	0	0	0	0	0	0	0	0	0	0	0	0	0	0	0	0	0	0	0	0	0	0	0	0	0	0	0	0	0	0	0	0	0
hsa-miR-1181	0	0	0	0	0	0	0	0	0	0	0	0	0	0	0	0	0	0	0	0	0	0	0	0	0	0	0	0	0	0	0	0	0	0	0	0	0	0	0	0	0	0	0	0	0	0	0	0	0
hsa-miR-1182	0	0	0	0	0	0	0	0	0	0	0	0	0	0	0	0	0	0	0	0	0	0	0	0	0	0	0	0	0	0	0	0	0	0	0	0	0	0	0	0	0	0	0	0	0	0	0	0	0
hsa-miR-1183	0	0	0	0	0	0	0	0	0	0	0	0	0	0	0	0	0	0	0	0	0	0	0	0	0	0	0	0	0	0	0	0	0	0	0	0	0	0	0	0	0	0	0	0	0	0	0	0	0
hsa-miR-1184	0	0	0	0	0	0	0	0	0	0	0	0	0	0	0	0	0	0	0	0	0	0	0	0	0	0	0	0	0	0	0	0	0	0	0	0	0	0	0	0	0	0	0	0	0	0	0	0	0
hsa-miR-1185-1-3p	4	0	0	0	0	3	0	0	0	1	1	0	0	0	2	0	0	3	1	1	2	0	0	0	6	0	0	2	0	1	0	0	1	1	0	0	1	0	0	3	1	0	0	0	0	0	0	0	1
hsa-miR-1185-2-3p	0	0	0	0	0	0	1	0	0	0	0	0	0	0	0	0	0	0	0	0	0	0	0	0	0	0	0	0	0	0	0	0	0	0	0	0	0	0	0	0	0	0	0	0	0	0	0	0	1
hsa-miR-1185-5p	0	0	0	0	0	0	0	0	0	0	0	0	0	0	0	0	0	0	0	0	0	0	0	0	0	0	0	0	0	0	0	0	0	0	0	0	0	0	0	0	0	0	0	0	0	0	0	0	0
hsa-miR-1193	0	0	0	0	0	0	0	0	0	0	0	0	0	0	0	0	0	0	0	0	0	0	0	0	0	0	0	0	0	0	0	0	0	0	0	0	0	0	0	0	0	0	0	0	0	0	0	0	0
hsa-miR-1197	1	0	0	0	0	0	0	0	0	0	4	0	0	0	0	0	0	0	0	0	0	0	0	0	0	0	0	2	0	0	0	0	0	0	1	0	0	0	0	0	2	0	0	0	0	0	1	0	0
hsa-miR-1199-3p	0	0	0	0	0	0	0	0	0	0	0	0	0	0	0	0	0	0	0	0	0	0	0	0	0	0	0	0	0	0	0	0	0	0	0	0	0	0	0	0	0	0	0	0	0	0	0	0	0
hsa-miR-1199-5p	0	0	0	0	0	0	0	0	0	0	0	0	0	0	0	0	0	0	0	0	0	0	0	0	0	0	0	0	0	0	0	0	0	0	0	0	0	0	0	0	0	0	0	0	0	0	0	0	0
hsa-miR-1200	0	0	0	0	0	0	0	0	0	0	0	0	0	0	0	0	0	0	0	0	0	0	0	0	0	0	0	0	0	0	0	0	0	0	0	0	0	0	0	0	0	0	0	0	0	0	0	0	0
hsa-miR-1202	0	0	0	0	0	0	0	0	0	0	0	0	0	0	0	0	0	0	0	0	0	0	0	0	0	0	0	0	0	0	0	0	0	0	0	0	0	0	0	0	0	0	0	0	0	0	0	0	0
hsa-miR-1203	0	0	0	0	0	0	0	0	0	0	0	0	0	0	0	0	0	0	0	0	0	0	0	0	0	0	0	0	0	0	0	0	0	0	0	0	0	0	0	0	0	0	0	0	0	0	0	0	0
hsa-miR-1204	0	0	0	0	0	0	0	0	0	0	0	0	0	0	0	0	0	0	0	0	0	0	0	0	0	0	0	0	0	0	0	0	0	0	0	0	0	0	0	0	0	0	0	0	0	0	0	0	0
hsa-miR-1205	0	0	0	0	0	0	0	0	0	0	0	0	0	0	0	0	0	0	0	0	0	0	0	0	0	0	0	0	0	0	0	0	0	0	0	0	0	0	0	0	0	0	0	0	0	0	0	0	0
hsa-miR-1206	0	0	0	0	0	0	0	0	0	0	0	0	0	0	0	0	0	0	0	0	0	0	0	0	0	0	0	0	0	0	0	0	0	0	0	0	0	0	0	0	0	0	0	0	0	0	0	0	0
hsa-miR-1207-3p	0	0	0	0	0	0	0	0	0	0	0	0	0	0	0	0	0	0	0	0	0	0	0	0	0	0	0	0	0	0	0	0	0	0	0	0	0	0	0	0	0	0	0	0	0	0	0	0	0
hsa-miR-1207-5p	0	0	0	0	0	0	0	0	0	0	0	0	0	0	0	0	0	0	0	0	0	0	0	0	0	0	0	0	0	0	0	0	0	0	0	0	0	0	0	0	0	0	0	0	0	0	0	0	0
hsa-miR-1208	0	0	0	0	0	0	0	0	0	0	0	0	0	0	0	0	0	0	0	0	0	0	0	0	0	0	0	0	0	0	0	0	0	0	0	0	0	0	0	0	0	0	0	0	0	0	0	0	0
hsa-miR-1224-3p	0	0	0	0	0	0	0	0	0	0	0	0	0	0	0	0	0	0	0	0	0	0	0	0	0	0	0	0	0	0	0	0	0	0	0	0	0	0	0	0	0	0	0	0	0	0	0	0	0
hsa-miR-1224-5p	0	0	2	0	0	0	1	11	0	0	0	0	0	9	0	1	30	0	2	4	0	0	1	2	1	2	4	3	10	0	2	0	0	12	1	4	3	10	0	7	6	1	2	4	1	1	2	9	0
hsa-miR-1225-3p	0	0	0	0	0	0	0	0	0	0	0	0	0	0	0	0	0	0	0	0	0	0	0	0	0	0	0	0	0	0	0	0	0	0	0	0	0	0	0	0	0	0	0	0	0	0	0	0	0
hsa-miR-1225-5p	0	0	0	0	0	0	0	0	0	0	0	0	0	0	0	0	0	0	0	0	0	0	0	0	0	0	0	0	0	0	0	0	0	0	0	0	0	0	0	0	0	0	0	0	0	0	0	0	0
hsa-miR-1226-3p	0	0	0	0	0	0	0	0	0	0	0	1	0	0	0	0	0	1	1	0	0	0	0	0	0	0	0	1	0	0	0	0	0	0	0	0	0	0	0	0	0	0	0	0	0	0	0	0	0
hsa-miR-1226-5p	0	0	0	0	0	0	0	0	0	0	0	0	0	0	0	0	1	0	0	0	0	0	0	0	0	0	0	0	0	0	0	0	0	0	0	0	0	0	0	0	0	0	0	0	0	1	0	0	0
hsa-miR-1227-3p	0	0	0	0	0	0	0	0	0	0	0	0	0	0	0	0	0	0	0	0	0	0	0	0	0	0	0	0	0	0	0	0	0	1	0	0	0	0	0	0	0	0	0	0	0	0	0	0	0
hsa-miR-1227-5p	0	0	0	0	0	0	0	0	0	0	0	0	0	0	0	0	0	0	0	0	0	0	0	0	0	0	0	0	0	0	0	0	0	0	0	0	0	0	0	0	0	0	0	0	0	0	0	0	0
hsa-miR-1228-3p	0	0	0	0	0	0	0	0	0	0	0	0	0	0	0	0	0	0	0	0	0	0	0	0	0	0	0	0	0	0	0	0	0	0	0	0	0	0	0	0	0	0	0	0	0	0	0	0	0
hsa-miR-1228-5p	0	0	0	0	0	0	0	0	0	0	0	0	0	0	0	1	0	0	0	0	0	0	4	0	0	1	0	4	1	0	0	0	0	1	0	1	6	1	0	0	0	0	2	0	0	14	0	0	0
hsa-miR-1229-3p	0	0	0	0	0	1	0	0	0	0	0	0	0	0	0	0	0	0	0	0	0	0	0	0	0	0	0	0	0	0	0	0	0	0	0	0	0	0	0	0	0	0	0	0	0	0	0	0	0
hsa-miR-1229-5p	0	0	0	0	0	0	0	0	0	0	0	0	0	0	0	0	0	0	0	0	0	0	0	0	0	0	0	0	0	0	0	0	0	0	0	0	0	0	0	0	0	0	0	0	0	0	0	0	0
hsa-miR-1231	0	0	0	0	0	0	0	0	0	0	0	0	0	0	0	0	0	0	0	0	0	0	0	0	0	0	0	0	0	0	0	0	0	0	0	0	0	0	0	0	0	0	0	0	0	0	0	0	0
hsa-miR-1233-3p	0	0	0	0	0	0	0	0	0	0	0	0	0	0	0	0	0	0	0	0	0	0	0	0	0	0	0	0	0	0	0	0	0	0	0	0	0	0	0	0	0	0	0	0	0	0	0	0	0
hsa-miR-1233-5p	0	0	0	0	0	0	0	0	0	0	0	0	0	0	0	0	0	0	0	0	0	0	0	0	0	0	0	0	0	0	0	0	0	0	0	0	0	0	0	0	0	0	0	0	0	0	0	0	0
hsa-miR-1234-3p	0	0	0	0	0	0	0	0	0	0	0	0	0	0	0	0	0	0	0	0	0	0	0	0	0	0	0	0	0	0	0	0	0	0	0	0	0	0	0	0	0	0	0	0	0	0	0	0	0
hsa-miR-1236-3p	0	0	0	0	0	0	0	0	0	0	0	0	0	0	0	0	0	0	0	0	0	0	0	0	0	0	0	0	0	0	0	0	0	0	0	0	0	0	0	0	0	0	0	0	0	0	0	0	0
hsa-miR-1236-5p	0	0	0	0	0	0	0	0	0	0	0	0	0	0	0	0	1	0	0	0	0	0	0	0	0	0	0	0	0	0	0	0	0	0	0	0	0	0	0	0	0	0	0	0	0	0	0	0	0
hsa-miR-1237-3p	0	0	0	0	0	0	0	0	0	0	0	0	0	0	0	0	0	0	0	0	0	0	0	0	0	0	0	0	0	0	0	0	0	0	0	0	0	0	0	0	0	0	0	0	0	0	0	0	0
hsa-miR-1237-5p	0	0	0	0	0	0	0	0	0	0	0	0	0	0	0	0	0	0	0	0	0	0	0	0	0	0	0	0	0	0	0	0	0	0	0	0	0	0	0	0	0	0	0	0	0	0	0	0	0
hsa-miR-1238-3p	0	0	0	0	0	0	0	1	0	0	0	0	0	0	0	0	0	0	0	0	0	0	0	0	0	0	0	0	0	0	0	0	0	0	0	0	0	0	0	0	0	0	0	0	0	0	0	0	0
hsa-miR-1238-5p	0	0	0	0	0	0	0	0	0	0	0	0	0	0	0	0	0	0	0	0	0	0	0	0	0	0	0	0	0	0	0	0	0	0	0	0	0	0	0	0	0	0	0	0	0	0	0	0	0
hsa-miR-1243	0	0	0	0	0	0	0	0	0	0	0	0	0	0	0	0	0	0	0	0	0	0	0	0	0	0	0	0	0	0	0	0	0	0	0	0	0	0	0	0	0	0	0	0	0	0	0	0	0
hsa-miR-1244	0	0	0	0	0	0	0	0	0	0	0	0	0	0	0	0	0	0	0	0	0	0	0	0	0	0	0	0	0	0	0	0	0	0	0	0	0	0	0	0	0	0	0	0	0	0	0	0	0
hsa-miR-1245a	0	0	0	0	0	0	0	0	0	0	0	0	0	0	0	0	0	0	0	0	0	0	0	0	0	0	0	0	0	0	0	0	0	0	0	0	0	0	0	0	0	0	0	0	0	0	0	0	0
hsa-miR-1245b-3p	0	0	0	0	0	0	0	0	0	0	0	0	0	0	0	0	0	0	0	0	0	0	0	0	0	0	0	0	0	0	0	0	0	0	0	0	0	0	0	0	0	0	0	0	0	0	0	0	0
hsa-miR-1245b-5p	0	0	0	0	0	0	0	0	0	0	0	0	0	0	0	0	0	0	0	0	0	0	0	0	0	0	0	0	0	0	0	0	0	0	0	0	0	0	0	0	0	0	0	0	0	0	0	0	0
hsa-miR-1246	282	388	1764	341	804	651	226	3038	199	1281	544	1011	2232	78	737	1663	106	827	3663	365	1620	390	86	1039	679	513	171	225	99	2322	196	814	1068	391	1631	2175	75	21	689	692	425	974	311	36	139	118	101	282	1026
hsa-miR-1247-3p	0	0	0	0	0	0	0	1	0	0	0	0	0	0	0	0	0	0	0	0	0	0	0	0	0	0	0	0	0	0	0	0	0	0	0	0	0	0	0	0	0	0	0	0	0	0	0	0	0
hsa-miR-1247-5p	0	0	0	0	0	0	0	0	0	0	0	0	0	0	0	0	0	0	0	0	0	0	0	0	0	0	0	0	0	0	0	0	0	0	0	0	0	0	0	0	0	0	0	0	0	0	0	0	0
hsa-miR-1248	0	0	0	0	0	0	0	0	0	0	0	0	0	0	0	0	0	0	0	0	0	0	0	0	0	0	0	0	0	0	0	0	0	0	0	0	0	0	0	0	0	0	0	0	0	0	0	0	0
hsa-miR-1249	0	0	0	0	0	0	0	0	0	0	0	0	0	0	0	0	0	0	0	0	0	0	0	0	0	0	0	0	0	0	0	0	0	0	0	0	0	0	0	0	0	0	0	0	0	0	0	0	1
hsa-miR-1250-3p	0	0	0	0	0	0	0	0	0	0	0	0	0	0	0	0	0	0	0	0	0	0	0	0	0	0	0	0	0	0	0	0	0	0	0	0	0	0	0	0	0	0	0	0	0	0	0	0	0
hsa-miR-1250-5p	4	0	4	1	2	0	0	0	4	2	3	2	0	0	3	2	0	3	3	4	5	2	1	1	0	1	0	0	0	7	1	4	1	1	3	1	1	0	0	0	0	3	3	0	0	2	2	0	0
hsa-miR-1251-3p	0	0	0	0	0	0	0	0	0	0	0	0	0	0	0	0	0	0	0	0	0	0	0	0	0	0	0	0	0	0	0	0	0	0	0	0	0	0	0	0	0	0	0	0	0	0	0	0	0
hsa-miR-1251-5p	0	0	0	0	0	0	0	0	0	0	0	0	0	0	0	0	0	0	0	0	0	0	0	0	0	0	0	0	0	0	0	0	0	0	0	0	0	0	0	0	0	0	0	0	0	0	0	0	0
hsa-miR-1252-3p	0	0	0	0	0	0	0	0	0	0	0	0	0	0	0	0	0	0	0	0	0	0	0	0	0	0	0	0	0	0	0	0	0	0	0	0	0	0	0	0	0	0	0	0	0	0	0	0	0
hsa-miR-1252-5p	0	0	0	0	0	0	0	0	0	0	0	0	0	0	0	0	0	0	0	0	0	0	0	0	0	0	0	0	0	0	0	0	0	0	0	0	0	0	0	0	0	0	0	0	0	0	0	0	0
hsa-miR-1253	0	0	0	0	0	0	0	0	0	0	0	0	0	0	0	0	0	0	0	0	0	0	0	0	0	0	0	0	0	0	0	0	0	0	0	0	0	0	0	0	0	0	0	0	0	0	0	0	0
hsa-miR-1254	2	1	4	0	1	2	0	3	0	3	1	1	4	0	1	2	1	0	4	3	2	1	0	0	2	0	0	3	3	0	1	1	0	3	2	1	0	0	0	0	1	1	0	0	0	1	1	0	1
hsa-miR-1255a	3	1	1	4	5	6	5	6	1	0	3	5	4	0	7	4	0	0	2	7	5	0	1	3	2	2	2	1	0	2	0	2	2	0	1	2	2	3	0	3	5	0	4	0	1	1	2	0	4
hsa-miR-1255b-2-3p	0	0	0	0	0	0	0	0	0	0	0	0	0	0	0	0	0	0	0	0	0	0	0	0	0	0	0	0	0	0	0	0	0	0	0	0	0	0	0	0	0	0	0	0	0	0	0	0	0
hsa-miR-1255b-5p	13	14	3	2	2	3	9	0	5	1	1	2	4	7	7	4	18	0	3	13	0	4	15	3	2	1	7	19	27	0	6	3	1	26	1	3	2	25	0	4	3	6	2	4	1	2	19	0	1
hsa-miR-1256	0	0	0	0	0	0	0	0	0	0	0	0	0	0	0	0	0	0	0	0	0	0	0	0	0	0	0	0	0	0	0	0	0	0	0	0	0	0	0	0	0	0	0	0	0	0	0	0	0
hsa-miR-1257	0	0	0	0	0	0	0	0	0	0	0	0	0	0	0	0	0	0	0	0	0	0	0	0	0	0	0	0	0	0	0	0	0	0	0	0	0	0	0	0	0	0	0	0	0	0	0	0	0
hsa-miR-1258	0	0	0	0	0	0	0	0	0	0	0	0	0	0	0	0	0	0	0	0	0	0	0	0	0	0	0	0	0	0	0	0	0	0	0	0	0	0	0	0	0	0	0	0	0	0	0	0	0
hsa-miR-1260a	0	0	0	0	1	1	1	0	0	0	0	2	1	0	0	1	0	1	0	0	0	1	0	1	1	0	1	1	0	1	0	0	0	1	0	3	1	0	0	1	0	0	0	0	0	0	1	0	1
hsa-miR-1260b	3	1	0	2	3	6	2	1	0	0	2	2	2	1	2	1	0	3	1	2	0	3	2	5	2	2	3	2	0	1	3	1	1	1	2	1	1	0	1	2	2	1	1	2	2	0	1	1	2
hsa-miR-1261	0	0	0	0	0	0	0	0	0	0	0	0	0	0	0	0	0	0	0	0	0	0	0	0	0	0	0	0	0	0	0	0	0	0	0	0	0	0	0	0	0	0	0	0	0	0	0	0	0
hsa-miR-1262	0	3	1	1	0	0	0	0	0	0	1	1	9	0	3	3	0	2	3	3	5	0	1	7	1	0	0	0	1	6	0	1	6	1	0	0	0	1	1	0	0	3	1	0	0	2	0	0	1
hsa-miR-1263	0	0	0	0	0	0	0	0	0	0	0	0	0	0	0	0	0	0	0	0	0	0	0	0	0	0	0	0	0	0	0	0	0	0	0	0	0	0	0	0	0	0	0	0	0	0	0	0	0
hsa-miR-1264	0	0	0	0	0	0	0	0	0	0	0	0	0	0	0	0	0	0	0	0	0	0	0	0	0	0	0	0	0	0	0	0	0	0	0	0	0	0	0	0	0	0	0	0	0	0	0	0	0
hsa-miR-1265	0	0	0	0	0	0	0	0	0	0	0	0	0	0	0	0	0	0	0	0	0	0	0	0	0	0	0	0	0	0	0	0	0	0	0	0	0	0	0	0	0	0	0	0	0	0	0	0	0
hsa-miR-1266-3p	0	0	0	0	0	0	0	0	0	0	0	0	0	0	0	0	0	0	0	0	0	0	0	0	0	0	0	0	0	0	0	0	0	0	0	0	0	0	0	0	0	0	0	0	0	0	0	0	0
hsa-miR-1266-5p	0	0	0	0	0	0	0	0	0	0	0	0	0	0	0	0	0	0	0	0	0	0	0	0	0	0	0	0	0	0	0	0	0	0	0	0	0	0	0	0	0	0	0	0	0	0	0	0	0
hsa-miR-1267	0	0	0	0	0	0	0	0	0	0	0	0	0	0	0	0	0	0	0	0	0	0	0	0	0	0	0	0	0	0	0	0	0	0	0	0	0	0	0	0	0	0	0	0	0	0	0	0	0
hsa-miR-1268a	0	0	0	0	0	0	0	3	0	0	0	0	0	0	0	1	0	0	0	1	0	0	0	0	0	0	0	0	0	0	0	0	0	0	0	0	0	0	0	0	0	0	0	0	0	0	0	0	0
hsa-miR-1268b	0	0	0	0	0	0	0	2	0	0	0	0	0	0	0	1	0	0	0	2	1	0	0	0	0	0	0	0	0	0	0	0	0	0	0	0	0	0	0	0	1	0	0	0	0	0	0	0	0
hsa-miR-1269a	0	0	0	0	0	0	0	4	0	0	0	0	0	0	0	2	0	0	0	0	0	0	0	0	0	0	0	0	0	0	0	0	0	0	0	0	0	0	0	0	0	0	0	0	0	0	0	0	0
hsa-miR-1269b	0	0	0	0	0	0	0	0	0	0	0	0	0	0	0	0	0	0	0	0	1	0	0	0	0	31	0	0	0	0	0	0	0	0	0	0	0	0	0	0	0	0	0	0	0	0	0	0	0
hsa-miR-1270	0	1	1	1	0	0	1	0	1	0	1	0	0	0	1	0	5	0	0	2	0	0	1	0	0	0	0	2	0	0	0	1	0	0	2	0	0	0	0	0	1	1	0	0	0	0	2	0	0
hsa-miR-1271-3p	0	0	0	0	0	0	0	0	0	0	0	0	0	0	0	0	0	0	0	0	0	0	0	0	0	0	0	0	0	0	0	0	0	0	0	0	0	0	0	0	0	0	0	0	0	0	0	0	0
hsa-miR-1271-5p	3	0	1	2	0	1	0	0	2	0	0	0	0	0	1	0	0	0	0	2	0	1	3	1	2	0	0	0	0	0	0	0	0	1	1	0	0	0	0	0	1	0	2	0	1	1	1	0	0
hsa-miR-1272	0	0	0	0	0	0	0	0	0	0	0	0	0	0	0	0	0	0	0	0	0	0	0	0	0	0	0	0	0	0	0	0	0	0	0	0	0	0	0	0	0	0	0	0	0	0	0	0	0
hsa-miR-1273a	0	0	0	0	0	0	0	0	0	0	0	0	0	0	0	0	0	0	0	0	0	0	0	0	0	0	0	0	0	0	0	0	0	0	0	0	0	0	0	0	0	0	0	0	0	0	0	0	0
hsa-miR-1273c	0	0	1	0	0	0	0	0	1	0	0	0	0	2	0	0	2	0	0	2	1	0	0	0	1	0	0	0	2	0	0	0	0	1	0	1	0	1	0	0	0	0	0	0	0	0	0	0	0
hsa-miR-1273d	0	0	0	0	0	1	0	0	0	0	0	0	0	0	0	0	0	0	1	0	0	0	0	0	0	0	0	0	0	0	0	0	0	0	0	0	0	0	0	0	0	0	0	0	0	0	0	0	0
hsa-miR-1273e	0	0	0	0	0	0	0	0	0	0	0	0	0	0	0	0	0	0	0	0	0	0	0	0	0	0	0	0	0	0	0	0	0	0	0	0	0	0	0	0	0	0	0	0	0	0	0	0	0
hsa-miR-1273f	0	0	0	0	0	0	0	0	0	0	0	0	0	0	0	0	0	0	0	0	0	0	0	0	0	0	0	0	0	0	0	0	0	0	0	0	0	0	0	0	0	0	0	0	0	0	0	0	0
hsa-miR-1273g-3p	0	0	0	0	0	0	0	0	0	0	0	0	0	0	0	0	0	0	0	0	0	1	0	1	0	0	0	0	0	0	0	0	0	0	0	0	0	0	0	0	0	0	0	0	0	0	0	0	0
hsa-miR-1273g-5p	0	0	0	0	0	0	0	0	0	0	0	0	0	0	0	0	0	0	0	0	0	0	0	0	0	0	0	0	0	0	0	0	0	0	0	0	0	0	0	0	0	0	0	0	0	0	0	0	0
hsa-miR-1273h-3p	9	7	6	8	14	15	7	18	6	8	8	20	13	12	17	9	5	11	8	4	17	7	6	15	12	3	4	6	2	15	4	6	8	3	7	5	2	2	7	6	7	3	9	3	7	7	3	3	12
hsa-miR-1273h-5p	0	0	0	1	0	0	1	2	0	0	1	1	0	0	1	0	0	3	0	0	1	0	0	0	0	0	0	0	0	1	0	0	0	0	0	0	0	0	0	0	0	0	1	0	0	0	0	0	1
hsa-miR-1275	0	0	0	0	0	0	0	0	0	0	0	0	0	0	0	0	0	0	0	0	0	0	0	0	0	0	0	0	0	0	0	0	0	0	0	0	0	0	0	0	0	0	0	0	0	0	0	0	0
hsa-miR-1276	0	0	0	0	0	0	0	0	0	0	0	0	0	0	0	0	0	0	0	0	0	0	0	0	0	0	0	0	0	0	0	0	0	0	0	0	0	0	0	0	0	0	0	0	0	0	0	0	1
hsa-miR-1277-3p	0	0	0	0	0	0	0	0	2	1	0	0	0	0	1	0	0	2	0	0	3	0	0	0	1	1	0	0	0	0	0	0	0	0	0	0	0	0	0	0	0	0	0	0	0	0	0	0	0
hsa-miR-1277-5p	0	1	1	1	0	1	2	0	0	0	1	0	0	1	1	2	0	0	1	4	0	0	0	1	0	0	1	0	0	0	0	1	0	0	1	0	0	0	0	0	2	0	0	0	0	0	1	0	0
hsa-miR-1278	1	3	2	4	1	0	3	1	4	1	1	2	2	0	3	6	1	1	1	13	1	0	4	0	2	1	1	1	4	0	0	1	1	2	1	0	3	3	0	0	1	1	1	0	0	1	8	0	1
hsa-miR-1279	0	0	0	0	0	0	0	0	0	0	0	0	0	0	0	0	0	0	0	0	0	0	0	0	0	0	0	0	0	0	0	0	0	0	0	0	0	0	0	0	0	0	0	0	0	0	0	0	0
hsa-miR-1281	0	0	0	0	0	0	0	0	0	0	0	0	0	0	0	0	0	0	0	0	0	0	0	0	0	0	0	0	0	0	0	0	0	0	0	0	0	0	0	0	0	0	0	0	0	0	0	0	0
hsa-miR-1282	0	0	0	0	0	0	0	0	0	0	0	0	0	0	0	0	0	0	0	0	0	0	0	0	0	0	0	0	0	0	0	0	0	0	0	0	0	0	0	0	0	0	0	0	0	0	0	0	0
hsa-miR-1283	0	0	0	0	0	0	0	0	0	0	0	0	0	0	0	0	0	0	0	0	0	0	0	0	0	0	0	0	0	0	0	0	0	0	0	0	0	0	0	0	0	0	0	0	0	0	0	0	0
hsa-miR-1284	0	3	2	2	3	7	3	6	0	2	3	2	4	12	0	4	29	6	8	9	3	5	2	5	5	6	4	6	10	5	5	2	0	9	10	3	6	6	2	7	8	1	6	10	4	7	9	4	5
hsa-miR-1285-3p	22	24	46	14	7	3	19	13	8	8	12	7	22	47	16	12	40	6	12	39	13	12	10	6	5	7	12	13	30	4	17	4	14	33	35	8	15	17	4	18	11	13	5	10	2	5	38	10	5
hsa-miR-1285-5p	0	0	0	0	0	0	0	0	0	0	0	0	0	0	0	0	0	0	0	0	0	0	0	0	0	0	0	0	0	0	0	0	0	0	0	0	0	0	0	0	0	0	0	0	0	0	0	0	0
hsa-miR-1286	0	0	0	0	0	0	0	0	0	0	0	0	0	0	0	0	0	0	0	0	0	0	0	0	0	0	0	0	0	0	0	0	0	0	0	0	0	0	0	0	0	0	0	0	0	0	0	0	0
hsa-miR-1287-3p	0	0	0	0	0	0	0	0	0	0	0	0	0	0	0	0	0	0	0	0	0	0	0	0	0	0	0	0	0	0	0	0	0	0	0	0	0	0	0	0	0	0	0	0	0	0	0	0	0
hsa-miR-1287-5p	4	2	4	1	2	2	4	2	3	2	2	3	3	0	2	0	2	3	1	4	0	0	5	1	2	3	2	0	2	0	1	0	0	3	2	2	2	0	0	1	2	0	1	2	1	0	3	0	0
hsa-miR-1288-3p	4	2	3	1	3	2	1	0	2	1	1	1	1	0	1	2	1	1	1	5	0	0	2	0	0	0	0	0	1	1	1	1	1	2	1	0	0	2	0	2	0	2	1	1	0	2	1	1	0
hsa-miR-1288-5p	0	0	0	0	0	0	0	0	0	0	0	0	0	0	0	0	0	0	0	0	0	0	0	0	0	0	0	0	0	0	0	0	0	0	0	0	0	0	0	0	0	0	0	0	0	0	0	0	0
hsa-miR-1289	0	0	0	0	0	0	0	0	0	0	0	0	0	0	0	0	1	0	0	2	0	0	0	0	0	0	0	1	0	0	0	0	0	0	0	0	0	0	0	0	0	0	0	0	0	0	0	0	0
hsa-miR-1290	0	0	0	0	0	0	0	3	0	1	1	0	1	0	0	2	0	0	4	0	1	0	0	1	0	0	0	0	0	2	0	0	1	0	0	1	0	0	1	0	0	0	0	0	0	0	0	0	1
hsa-miR-1291	10	2	2	1	1	1	0	3	4	2	1	1	0	2	1	0	0	1	3	0	2	1	1	3	2	4	0	0	0	2	0	3	1	0	2	6	0	0	0	3	0	2	2	0	1	1	0	0	0
hsa-miR-1292-3p	0	0	0	0	0	0	0	0	0	0	0	0	0	0	0	0	0	0	0	0	0	0	0	0	0	0	0	0	0	0	0	0	0	0	0	0	0	0	0	0	0	0	0	0	0	0	0	0	0
hsa-miR-1292-5p	5	4	3	3	2	2	7	2	1	0	4	1	3	4	1	2	8	1	3	10	3	3	4	2	5	0	3	7	6	1	5	1	1	15	2	3	6	6	1	2	5	2	3	4	3	2	5	2	3
hsa-miR-1293	0	0	0	0	0	0	0	0	0	0	0	0	0	0	0	0	0	0	0	0	0	0	0	0	0	0	0	0	0	0	0	0	0	0	0	0	0	0	0	0	0	0	0	0	0	0	0	0	0
hsa-miR-1294	11	38	26	8	2	7	21	12	13	9	7	5	7	6	14	14	22	6	12	26	4	4	6	4	6	2	4	6	29	7	21	7	10	24	11	3	8	9	3	10	9	12	4	5	2	9	36	10	6
hsa-miR-1295a	0	0	0	0	0	0	0	0	0	0	0	0	0	0	1	0	0	0	0	0	0	0	0	0	0	1	0	0	0	0	0	0	0	0	0	0	0	0	0	0	0	0	0	0	0	0	0	0	0
hsa-miR-1295b-3p	0	0	0	0	0	0	0	0	0	0	0	0	0	0	0	0	0	0	0	0	1	0	0	0	0	0	0	0	0	0	0	0	0	0	0	0	0	0	0	0	0	0	0	0	0	0	0	0	0
hsa-miR-1295b-5p	0	0	0	0	0	0	0	0	0	0	0	0	0	0	0	0	0	0	0	0	0	0	0	0	0	0	0	0	0	0	0	0	0	0	0	0	0	0	0	0	0	0	0	0	0	0	0	0	0
hsa-miR-1296-3p	0	0	0	0	0	0	0	1	0	0	0	0	0	0	0	0	0	0	0	0	0	0	0	0	0	0	0	0	0	0	0	0	0	0	0	0	0	0	0	0	0	0	0	0	0	0	0	0	0
hsa-miR-1296-5p	0	0	0	0	0	0	0	0	0	0	0	0	0	0	0	0	0	0	0	1	0	0	3	1	0	0	0	0	0	1	0	0	0	0	0	0	0	0	0	0	0	0	0	0	0	0	0	0	0
hsa-miR-1297	0	1	2	1	0	0	0	0	2	0	0	0	0	0	0	0	0	0	0	1	2	0	0	0	0	0	0	0	0	0	0	0	0	0	1	0	0	0	0	0	0	0	0	0	0	0	0	0	0
hsa-miR-1298-3p	0	0	0	0	0	0	0	0	0	0	0	0	0	0	0	0	0	0	0	0	0	0	0	0	0	0	0	0	0	0	0	0	0	0	0	0	0	0	0	0	0	0	0	0	0	0	0	0	0
hsa-miR-1298-5p	0	0	0	0	1	1	0	0	0	0	0	0	0	0	0	1	0	0	0	0	0	0	0	0	0	0	0	0	0	0	0	0	0	0	0	0	0	0	0	0	0	0	0	0	0	0	0	0	0
hsa-miR-1299	0	0	4	2	2	1	7	0	17	1	9	117	0	2	5	2	10	9	2	6	5	4	0	0	4	20	0	6	0	0	2	1	0	7	0	12	16	20	2	1	0	0	9	1	0	0	0	7	0
hsa-miR-1301-3p	29	29	22	11	54	80	46	68	4	53	44	62	27	7	38	36	14	33	31	29	24	41	24	18	63	37	34	26	28	48	10	35	20	19	31	20	21	16	19	31	49	11	36	16	35	25	14	8	65
hsa-miR-1301-5p	0	0	0	0	0	0	0	0	0	0	0	0	0	0	0	0	0	0	0	0	0	0	0	0	0	0	0	0	0	0	0	0	0	0	0	0	0	0	0	0	0	0	0	0	0	0	0	0	0
hsa-miR-1302	0	0	0	0	0	0	0	0	0	0	0	0	0	0	0	0	0	0	0	0	0	0	0	0	0	0	0	0	0	0	0	0	0	0	0	0	0	0	0	0	0	0	0	0	0	0	0	0	0
hsa-miR-1303	0	0	0	0	0	0	0	0	0	0	0	0	0	0	0	1	0	0	0	0	0	0	0	0	0	0	0	0	3	0	0	0	0	3	0	1	2	0	0	0	0	0	0	1	1	0	0	0	0
hsa-miR-1304-3p	9	8	3	7	9	8	3	1	1	5	6	6	6	5	9	6	0	9	11	9	7	6	12	12	5	7	9	9	6	14	4	5	6	6	5	4	3	6	3	5	5	8	11	7	4	12	5	3	5
hsa-miR-1304-5p	1	3	1	2	0	0	3	0	1	2	2	0	1	0	2	0	7	0	0	6	0	0	2	0	0	2	1	2	3	1	1	0	0	3	2	0	1	2	0	3	2	0	0	1	0	1	4	0	0
hsa-miR-1305	0	0	0	0	0	0	0	0	0	0	0	0	0	0	0	0	0	0	0	0	0	0	0	0	0	0	0	0	0	0	0	0	0	0	0	0	0	0	0	0	0	0	0	0	0	0	0	0	0
hsa-miR-1306-3p	2	1	4	2	0	0	1	0	1	1	1	1	2	3	1	1	8	1	0	2	1	0	1	2	2	0	3	0	4	0	1	0	0	10	0	1	1	0	0	2	2	1	1	1	0	1	3	1	0
hsa-miR-1306-5p	0	0	0	0	0	0	0	0	0	0	0	0	0	1	0	0	0	0	0	1	0	0	0	0	0	0	0	1	1	0	0	0	0	0	0	0	0	0	0	0	0	0	0	0	0	0	1	0	0
hsa-miR-1307-3p	170	260	122	114	304	736	338	551	49	250	290	445	176	124	373	242	495	238	157	280	190	235	425	249	346	145	312	339	229	215	73	200	68	210	132	166	227	203	88	145	321	88	331	200	275	327	117	82	265
hsa-miR-1307-5p	21	33	42	24	30	30	33	148	26	28	28	40	44	36	37	52	25	30	56	51	38	22	26	59	23	57	26	20	17	30	17	29	33	21	41	33	31	18	13	31	21	17	30	14	14	42	22	24	13
hsa-miR-1321	0	0	0	0	0	0	0	0	0	0	0	0	0	0	0	0	0	0	0	0	0	0	0	0	0	0	0	0	0	0	0	0	0	0	0	0	0	0	0	0	0	0	0	0	0	0	0	0	0
hsa-miR-1322	0	0	0	0	0	0	0	0	0	0	0	0	0	0	0	0	0	0	0	0	0	0	0	0	0	0	0	0	0	0	0	0	0	0	0	0	0	0	0	0	0	0	0	0	0	0	0	0	0
hsa-miR-1323	0	0	0	0	0	0	1	2	0	0	1	0	0	0	0	0	0	1	0	0	0	0	0	0	0	0	0	0	0	0	0	0	0	0	0	0	0	0	0	1	0	0	0	0	0	1	0	0	0
hsa-miR-1324	0	0	0	0	0	0	0	0	0	0	0	0	0	0	0	0	0	0	0	0	0	0	0	0	0	0	0	0	0	0	0	0	0	0	0	0	0	0	0	0	0	0	0	0	0	0	0	0	0
hsa-miR-1343-3p	0	0	0	0	0	2	0	1	0	0	0	0	0	0	0	0	0	0	0	0	0	0	0	0	0	0	0	0	0	0	0	0	0	0	0	0	1	0	0	0	0	0	0	0	0	0	0	0	0
hsa-miR-1343-5p	0	0	0	0	0	0	0	0	0	0	0	0	0	0	0	0	0	0	0	0	0	0	0	0	0	0	0	0	0	0	0	0	0	0	0	0	0	0	0	0	0	0	0	0	0	0	0	0	0
hsa-miR-1468-3p	0	0	0	0	0	0	0	0	0	0	0	0	0	0	0	0	0	0	0	0	0	0	0	0	0	0	0	0	0	0	0	0	0	0	0	0	0	0	0	0	0	0	0	0	0	0	0	0	0
hsa-miR-1468-5p	3	9	5	1	5	17	11	13	1	2	7	4	2	3	7	3	2	3	2	4	0	3	5	2	8	3	9	16	13	2	2	4	1	13	1	0	4	10	4	5	11	2	10	8	10	14	7	0	5
hsa-miR-1469	0	0	0	0	0	0	0	0	0	0	0	0	0	0	0	0	0	0	0	0	0	0	0	0	0	0	0	0	0	0	0	0	0	0	0	0	0	0	0	0	0	0	0	0	0	0	0	0	0
hsa-miR-1470	0	0	0	0	0	0	0	0	0	0	0	0	0	0	0	0	0	0	0	0	0	0	0	0	0	0	0	0	0	0	0	0	0	0	0	0	0	0	0	0	0	0	0	0	0	0	0	0	0
hsa-miR-1471	0	0	0	0	0	0	0	0	0	0	0	0	0	0	0	0	0	0	0	0	0	0	0	0	0	0	0	0	0	0	0	0	0	0	0	0	0	0	0	0	0	0	0	0	0	0	0	0	0
hsa-miR-1537-3p	0	0	0	0	0	0	0	0	0	0	0	0	0	0	0	0	0	0	0	0	0	0	0	0	0	0	0	0	0	0	0	0	0	0	0	0	0	0	0	0	0	0	0	0	0	0	0	0	0
hsa-miR-1537-5p	0	0	0	0	0	0	0	0	0	0	0	0	0	0	0	0	0	0	0	0	0	0	0	0	0	0	0	0	0	0	0	0	0	0	0	0	0	0	0	0	0	0	0	0	0	0	0	0	0
hsa-miR-1538	0	0	0	0	1	1	0	0	0	1	0	0	0	1	0	0	0	0	1	1	2	0	0	1	0	0	1	0	0	0	0	0	0	0	0	0	0	0	0	0	0	0	0	1	0	0	0	0	1
hsa-miR-1539	0	0	0	0	0	0	0	0	0	0	0	0	0	0	0	0	0	0	0	0	0	0	0	0	0	0	0	0	0	0	0	0	0	0	0	0	0	0	0	0	0	0	0	0	0	0	0	0	0
hsa-miR-1587	0	0	0	0	0	0	0	0	0	0	0	0	0	0	0	0	0	0	0	0	0	0	0	0	0	0	0	0	0	0	0	0	0	0	0	0	0	0	0	0	0	0	0	0	0	0	0	0	0
hsa-miR-1825	0	0	0	0	0	0	0	0	0	0	0	0	0	0	0	0	0	0	0	0	0	0	0	0	0	0	0	0	0	0	0	0	0	0	0	0	0	0	0	0	0	0	0	0	0	0	0	0	0
hsa-miR-1827	0	0	0	0	0	0	0	0	1	0	0	0	0	0	0	0	0	0	0	0	0	0	0	0	0	0	0	0	0	0	0	0	0	0	0	0	0	0	0	0	0	0	0	0	0	0	1	0	0
hsa-miR-1908-3p	0	0	0	0	0	0	0	0	0	0	0	0	0	0	0	0	0	0	0	0	0	0	0	0	0	0	0	0	0	0	0	0	0	0	0	0	0	0	0	0	0	0	0	0	0	0	0	0	0
hsa-miR-1908-5p	3	12	12	7	10	28	17	21	2	15	14	8	4	9	6	20	69	8	3	20	13	6	10	10	10	12	8	11	13	6	13	4	4	14	7	8	11	5	5	5	19	3	11	7	6	11	10	6	18
hsa-miR-1909-3p	0	0	0	0	0	0	0	0	0	0	0	0	0	0	0	0	0	0	0	0	0	0	0	0	0	0	0	0	0	0	0	0	0	0	0	0	0	0	0	0	0	0	0	0	0	0	0	0	0
hsa-miR-1909-5p	0	0	0	0	0	0	0	0	0	0	0	0	0	0	0	0	0	0	0	0	0	0	0	0	0	0	0	0	0	0	0	0	0	0	0	0	0	0	0	0	0	0	0	0	0	0	0	0	0
hsa-miR-1910-3p	0	0	0	0	0	0	0	0	0	0	0	0	0	0	0	0	0	0	0	0	0	0	0	0	0	0	0	0	0	1	0	0	0	1	0	0	0	0	0	0	0	0	0	0	0	0	0	0	0
hsa-miR-1910-5p	0	0	0	0	0	0	0	0	0	0	0	0	0	0	0	0	0	0	0	0	0	0	0	0	0	0	0	0	0	0	0	0	0	0	0	0	0	0	0	0	0	0	0	0	0	0	0	0	0
hsa-miR-1911-3p	0	0	0	0	0	0	0	0	0	0	0	0	0	0	0	0	0	0	0	0	0	0	0	0	0	0	0	0	0	0	0	0	0	0	0	0	0	0	0	0	0	0	0	0	0	0	0	0	0
hsa-miR-1911-5p	0	0	0	0	0	0	0	0	0	0	0	0	0	0	0	0	0	0	0	0	0	0	0	0	0	0	0	0	0	0	0	0	0	0	0	0	0	0	0	0	0	0	0	0	0	0	0	0	0
hsa-miR-1912	0	0	0	0	0	0	0	0	0	0	0	0	0	0	0	0	0	0	0	0	0	0	0	0	0	0	0	0	0	0	0	0	0	0	0	0	0	0	0	0	0	0	0	0	0	0	0	0	0
hsa-miR-1913	0	0	0	0	0	0	0	0	0	0	0	0	0	0	0	0	0	0	0	0	0	0	0	0	0	0	0	0	0	0	0	0	0	0	0	0	0	0	0	0	0	0	0	0	0	0	0	0	0
hsa-miR-1914-3p	0	0	0	0	0	0	0	0	0	0	0	0	0	0	0	0	0	0	0	0	0	0	0	0	0	0	0	0	0	0	0	0	0	0	0	0	0	0	0	0	0	0	0	0	0	0	0	0	0
hsa-miR-1914-5p	0	0	0	0	0	0	0	0	0	0	0	0	0	0	0	0	0	0	0	0	0	0	0	0	0	0	0	0	0	0	0	0	0	0	0	0	0	0	0	0	0	0	0	0	0	0	0	0	0
hsa-miR-1915-3p	0	0	0	0	0	0	0	0	0	0	0	0	0	0	0	0	0	0	0	0	0	0	0	0	0	0	0	0	0	0	0	0	0	0	0	0	0	0	0	0	0	0	0	0	0	0	0	0	0
hsa-miR-1915-5p	0	0	0	0	0	0	0	0	0	0	0	0	0	0	0	0	0	0	0	0	0	0	0	0	0	0	0	0	0	0	0	0	0	0	0	0	0	0	0	0	0	0	0	0	0	0	0	0	0
hsa-miR-1972	0	0	0	0	0	0	0	0	0	0	0	0	0	0	0	0	0	0	0	0	0	0	0	0	0	0	0	0	0	0	0	0	0	0	0	0	0	0	0	0	0	0	0	0	0	0	0	0	0
hsa-miR-1973	0	0	0	0	0	0	0	0	0	0	0	0	0	0	0	0	0	0	0	0	0	0	0	0	0	0	0	0	0	0	0	0	0	0	0	0	0	0	0	0	0	0	0	0	0	0	0	0	0
hsa-miR-1976	0	2	0	1	1	3	1	2	3	0	2	2	2	4	3	3	7	1	1	0	0	1	0	2	4	0	4	5	9	3	5	1	2	12	1	0	3	5	1	5	2	3	2	4	0	6	6	0	1
hsa-miR-2052	0	0	0	0	0	0	0	0	0	0	0	0	0	0	0	0	0	0	0	0	0	0	0	0	0	0	0	0	0	0	0	0	0	0	0	0	0	0	0	0	0	0	0	0	0	0	0	0	0
hsa-miR-2053	0	0	0	0	0	0	0	0	0	0	0	0	0	0	0	0	0	0	0	0	0	0	0	0	0	0	0	0	0	0	0	0	0	0	0	0	0	0	0	0	0	0	0	0	0	0	0	0	0
hsa-miR-2054	0	0	0	0	0	0	0	0	0	0	0	0	0	0	0	0	0	0	0	0	0	0	0	0	0	0	0	0	0	0	0	0	0	0	0	0	0	0	0	0	0	0	0	0	0	0	0	0	0
hsa-miR-2110	106	154	161	33	76	79	110	129	57	113	77	65	138	118	99	92	321	88	83	151	129	91	58	66	94	85	79	145	184	117	106	81	89	210	179	64	73	113	47	124	102	89	67	68	35	77	150	82	84
hsa-miR-2113	0	0	0	0	0	0	0	0	0	0	0	0	0	0	0	0	0	0	0	0	0	0	0	0	0	0	0	0	0	0	0	0	0	0	0	0	0	0	0	0	0	0	0	0	0	0	0	0	0
hsa-miR-2114-3p	0	0	0	0	0	0	0	0	0	0	0	0	0	0	0	0	0	0	0	0	0	0	0	0	0	0	0	0	0	0	0	0	0	0	0	0	0	0	0	0	0	0	0	0	0	0	0	0	0
hsa-miR-2114-5p	0	0	0	0	0	0	0	0	0	0	0	0	0	0	0	0	0	0	0	0	0	0	0	0	0	0	0	0	0	0	0	0	0	0	0	0	0	0	0	0	0	0	0	0	0	0	0	0	0
hsa-miR-2115-3p	2	3	4	4	4	2	2	5	4	4	4	0	12	0	7	2	0	3	23	4	8	2	1	7	6	3	0	5	2	17	0	3	8	4	4	8	1	2	1	1	5	10	6	0	1	1	2	2	1
hsa-miR-2115-5p	0	5	2	0	1	2	1	4	0	0	2	1	3	0	4	2	0	2	6	2	1	1	0	7	3	0	1	2	0	6	0	0	1	2	1	1	2	0	0	1	1	2	3	0	1	1	1	0	0
hsa-miR-2116-3p	0	0	0	0	0	0	0	0	0	0	0	0	0	0	0	0	0	0	0	0	0	0	0	0	0	0	0	0	0	0	0	0	0	0	0	0	0	0	0	0	0	0	0	0	0	0	0	0	0
hsa-miR-2116-5p	0	0	0	0	0	0	0	0	0	0	0	0	0	0	0	0	0	0	0	0	0	0	0	0	0	0	0	0	0	0	0	0	0	0	0	0	0	0	0	0	0	0	0	0	0	0	0	0	0
hsa-miR-2117	0	0	0	0	0	0	0	0	0	0	0	0	0	0	0	0	0	0	0	0	0	0	0	0	0	0	0	0	0	0	0	0	0	0	0	0	0	0	0	0	0	0	0	0	0	0	0	0	0
hsa-miR-2276-3p	0	0	2	0	1	0	0	0	0	0	0	0	0	0	0	0	0	0	0	0	0	0	0	0	0	0	0	0	0	0	0	0	0	0	0	0	0	0	0	0	0	0	0	0	0	0	0	0	0
hsa-miR-2276-5p	0	0	0	0	0	0	0	0	0	0	0	0	0	0	0	0	0	0	0	0	0	0	0	0	0	0	0	0	0	0	0	0	0	0	0	0	0	0	0	0	0	0	0	0	0	0	0	0	0
hsa-miR-2277-3p	0	0	0	0	0	0	0	0	0	0	0	0	0	0	0	0	0	0	0	0	0	0	0	0	0	0	0	0	0	0	0	0	0	0	0	0	0	0	0	0	0	0	0	0	0	0	0	0	0
hsa-miR-2277-5p	0	0	0	0	0	1	0	0	1	0	0	0	0	0	0	0	0	0	0	0	1	0	0	0	0	0	0	0	0	0	0	0	0	0	0	0	0	0	0	0	0	0	0	0	0	0	0	0	0
hsa-miR-2278	0	0	0	0	0	0	0	0	0	0	0	0	0	0	0	0	0	0	0	0	0	0	0	0	0	0	0	0	0	0	0	0	0	0	0	0	0	0	0	0	0	0	0	0	0	0	0	0	0
hsa-miR-2355-3p	4	4	2	2	3	1	2	0	2	3	1	5	6	0	7	4	0	3	4	3	4	3	6	3	3	1	3	1	1	4	1	3	2	0	2	2	1	0	0	0	4	6	4	0	1	4	1	0	0
hsa-miR-2355-5p	0	0	0	0	0	0	0	0	0	0	0	0	0	0	0	0	0	0	0	0	0	0	0	0	0	0	0	0	0	0	0	0	0	0	0	0	0	0	0	0	0	0	0	0	0	0	0	0	0
hsa-miR-2392	0	0	0	0	0	0	0	0	0	0	0	0	0	0	0	0	0	0	0	0	0	0	0	0	0	0	0	0	0	0	0	0	0	0	0	0	0	0	0	0	0	0	0	0	0	0	0	0	0
hsa-miR-2467-3p	0	0	0	0	0	0	0	0	0	0	0	0	0	0	0	0	0	0	0	0	0	0	0	0	0	0	0	0	0	0	0	0	0	0	0	0	0	0	0	0	0	0	0	0	0	0	0	0	0
hsa-miR-2467-5p	0	0	0	0	0	0	0	0	0	0	0	0	0	0	0	0	0	0	0	0	0	0	0	0	0	0	0	0	0	0	0	0	0	0	0	0	0	0	0	0	0	0	0	0	0	0	0	0	0
hsa-miR-2681-3p	0	0	0	0	0	0	0	0	0	0	0	0	0	0	0	0	0	0	0	0	0	0	0	0	0	0	0	0	0	0	0	0	0	0	0	0	0	0	0	0	0	0	0	0	0	0	0	0	0
hsa-miR-2681-5p	0	0	0	1	0	0	0	0	0	0	0	0	0	0	0	0	0	0	0	0	0	0	0	0	0	0	0	0	0	0	0	0	0	0	0	0	0	0	0	0	0	0	0	0	0	0	0	0	0
hsa-miR-2682-3p	0	0	0	0	0	0	0	0	0	0	0	0	0	0	0	0	0	0	0	0	0	0	0	0	0	0	0	0	0	0	0	0	0	0	0	0	0	0	0	0	0	0	0	0	0	0	0	0	0
hsa-miR-2682-5p	0	0	0	0	0	0	0	0	0	0	0	0	0	0	0	0	0	0	0	0	0	0	0	0	0	0	0	0	0	0	0	0	0	0	0	0	0	0	0	0	0	0	0	0	0	0	0	0	0
hsa-miR-2861	0	0	0	0	0	0	0	0	0	0	0	0	0	0	0	0	0	0	0	0	0	0	0	0	0	0	0	0	0	0	0	0	0	0	0	0	0	0	0	0	0	0	0	0	0	0	0	0	0
hsa-miR-2909	0	0	0	0	0	0	0	0	0	0	0	0	0	0	0	0	0	0	0	0	0	0	0	0	0	0	0	0	0	0	0	0	0	0	0	0	0	0	0	0	0	0	0	0	0	0	0	0	0
hsa-miR-3064-3p	0	0	0	0	0	0	0	0	0	0	0	0	0	0	0	0	0	0	0	0	0	0	0	0	0	0	0	0	0	0	0	0	0	0	0	0	0	0	0	0	0	0	0	0	0	0	0	0	0
hsa-miR-3064-5p	1	0	0	1	0	0	0	0	0	0	2	0	2	2	1	0	1	0	1	1	0	0	0	1	2	1	1	1	1	2	0	0	0	1	0	0	2	0	0	0	1	0	0	0	0	0	0	0	2
hsa-miR-3065-3p	0	0	0	0	0	0	0	0	0	0	0	0	0	0	0	0	0	0	0	0	0	0	0	0	0	0	0	0	0	0	0	0	0	0	0	0	0	0	0	0	0	0	0	0	0	0	0	0	0
hsa-miR-3065-5p	0	0	0	0	0	0	0	0	0	0	0	0	0	0	0	0	0	0	0	0	0	0	0	0	0	0	0	0	0	0	0	0	0	0	0	0	0	0	0	0	0	0	0	0	0	0	0	0	0
hsa-miR-3074-3p	0	0	0	0	0	0	0	0	0	0	0	0	0	0	0	0	0	0	0	0	0	0	0	0	0	0	0	0	0	0	0	0	0	0	0	0	0	0	0	0	0	0	0	0	0	0	0	0	0
hsa-miR-3074-5p	2	0	0	0	2	1	0	0	1	3	0	0	1	0	1	1	0	1	0	0	0	0	1	0	0	0	1	3	0	0	0	0	0	0	0	0	0	2	0	2	1	0	2	1	0	0	1	0	0
hsa-miR-3115	0	0	0	0	0	0	0	0	0	0	0	0	0	0	0	0	0	0	0	0	0	0	0	0	0	0	0	0	0	1	0	0	0	0	0	0	0	0	0	0	0	0	0	0	0	0	0	0	0
hsa-miR-3116	0	0	0	0	0	0	0	0	0	0	0	0	0	0	0	0	0	0	0	0	0	0	0	0	0	0	0	0	0	0	0	0	0	0	0	0	0	0	0	0	0	0	0	0	0	0	0	0	0
hsa-miR-3117-3p	0	0	0	0	0	0	0	0	0	0	0	0	0	0	0	0	0	0	0	0	0	0	0	0	0	0	0	0	0	0	0	0	0	0	0	0	0	0	0	0	0	0	0	0	0	0	0	0	0
hsa-miR-3117-5p	0	0	0	0	0	0	0	0	0	0	0	0	0	0	0	0	0	0	0	0	0	0	0	0	0	0	0	0	0	0	0	0	0	0	0	0	0	0	0	0	0	0	0	0	0	0	0	0	0
hsa-miR-3118	0	0	0	0	0	0	0	0	0	0	0	0	0	0	0	0	0	0	0	0	0	0	0	0	0	0	0	0	0	0	0	0	0	0	0	0	0	1	0	0	0	0	0	0	0	0	0	0	0
hsa-miR-3119	0	0	0	0	0	0	0	0	0	0	0	0	0	0	0	0	0	0	0	0	0	0	0	0	0	0	0	0	0	0	0	0	0	0	0	0	0	0	0	0	0	0	0	0	0	0	0	0	0
hsa-miR-3120-3p	10	7	6	8	7	5	9	3	2	5	8	8	2	4	6	3	1	6	9	5	2	3	7	5	3	1	3	0	0	4	1	3	1	1	1	2	1	1	2	1	2	1	2	2	3	2	2	0	3
hsa-miR-3120-5p	3	0	1	0	6	6	2	0	0	3	4	4	0	3	1	1	0	2	1	2	2	0	2	2	1	1	2	0	0	0	0	1	0	1	0	0	2	0	0	0	0	0	1	0	2	0	0	0	1
hsa-miR-3121-3p	1	0	0	0	0	0	1	0	0	0	1	0	0	0	1	0	1	0	1	1	1	0	0	0	0	0	0	0	0	1	0	0	0	0	0	0	0	0	0	0	1	0	0	0	0	0	0	0	0
hsa-miR-3121-5p	0	0	0	0	0	0	0	0	0	0	0	0	0	0	0	0	0	0	0	0	0	0	0	0	0	0	0	0	0	0	0	0	0	0	0	0	0	0	0	0	0	0	0	0	0	0	0	0	0
hsa-miR-3122	0	0	0	0	0	0	0	0	0	0	0	0	0	0	0	0	0	0	0	0	0	0	0	0	0	0	0	0	0	0	0	0	0	0	0	0	0	0	0	0	0	0	0	0	0	0	0	0	0
hsa-miR-3123	0	0	0	0	0	0	0	0	0	0	0	0	0	0	0	0	0	0	0	0	0	0	0	0	0	0	0	0	0	0	0	0	0	0	0	0	0	0	0	0	0	0	0	0	0	0	0	0	0
hsa-miR-3124-3p	0	0	0	0	0	0	0	0	0	0	0	0	0	0	0	0	0	0	0	0	0	0	0	0	0	0	0	0	0	0	0	0	0	0	0	0	0	0	0	0	0	0	0	0	0	0	0	0	0
hsa-miR-3124-5p	1	1	2	1	0	0	0	0	0	1	1	1	0	2	3	0	0	1	1	1	0	0	0	1	0	0	1	0	1	1	0	0	0	2	3	0	4	1	0	0	1	0	0	2	0	0	1	1	0
hsa-miR-3125	0	0	0	0	0	0	0	0	0	0	0	0	0	0	0	0	0	0	0	0	2	0	0	0	0	0	0	0	0	0	0	0	0	0	0	0	0	0	0	0	0	0	0	0	0	0	0	0	0
hsa-miR-3126-3p	0	0	0	0	0	0	0	0	0	0	0	0	0	0	0	0	0	0	0	0	0	0	0	0	0	0	0	0	0	0	0	0	0	0	0	0	0	0	0	0	0	0	0	0	0	0	0	0	0
hsa-miR-3126-5p	0	0	0	0	0	0	0	0	0	0	0	0	0	0	0	0	0	0	0	0	0	0	0	0	0	0	0	0	0	0	0	0	0	0	0	0	0	0	0	0	0	0	0	0	0	0	0	0	0
hsa-miR-3127-3p	0	0	0	0	1	1	0	1	0	0	0	1	0	0	0	2	0	0	0	0	0	0	0	0	0	0	0	0	0	0	0	0	0	1	0	0	0	0	0	0	1	0	0	0	0	0	0	0	0
hsa-miR-3127-5p	2	1	2	0	0	1	0	0	0	2	0	0	0	3	1	2	6	0	2	6	5	1	1	0	1	0	0	1	1	1	1	0	2	3	0	2	0	2	2	0	1	1	0	0	0	2	2	0	1
hsa-miR-3128	0	0	0	0	0	0	0	0	0	0	0	0	0	0	0	0	0	0	0	0	0	0	0	0	0	0	0	0	0	0	0	0	0	0	0	0	0	0	0	0	0	0	0	0	0	0	0	0	0
hsa-miR-3129-3p	0	0	0	0	0	0	0	0	0	0	0	0	0	0	0	0	0	0	0	0	0	0	0	0	0	0	0	0	0	0	0	0	0	0	0	0	0	0	0	0	0	0	0	0	0	2	0	0	0
hsa-miR-3129-5p	0	0	0	0	0	0	0	0	0	0	0	0	0	0	0	0	0	0	0	0	0	0	0	0	0	0	0	0	0	0	0	0	0	0	0	0	0	0	0	0	0	0	0	0	0	0	0	0	0
hsa-miR-3130-3p	0	0	1	0	0	1	0	0	0	3	4	1	6	0	0	0	0	0	0	0	0	1	1	2	0	0	0	0	0	1	0	1	0	0	0	0	1	0	0	4	1	1	0	2	0	0	0	0	0
hsa-miR-3130-5p	0	0	0	0	0	0	0	0	0	0	0	0	0	0	0	0	0	0	0	0	0	0	0	0	0	0	0	0	0	0	0	0	0	0	0	0	0	0	0	0	0	0	0	0	0	0	0	0	0
hsa-miR-3131	0	0	0	1	0	0	0	1	0	0	0	0	1	0	0	0	1	0	13	0	0	0	0	0	0	0	0	0	0	0	0	0	0	0	0	0	0	0	0	0	0	0	0	0	0	0	0	0	0
hsa-miR-3132	0	0	0	0	0	0	0	0	0	0	0	0	0	0	0	0	0	0	0	0	0	0	0	0	0	0	0	0	0	0	0	0	0	0	0	0	0	0	0	0	0	0	0	0	0	0	0	0	0
hsa-miR-3133	0	0	0	0	0	0	0	0	0	0	0	0	0	0	0	0	0	0	0	0	0	0	0	0	0	0	0	0	0	0	0	0	0	0	0	0	0	0	0	0	0	0	0	0	0	0	0	0	0
hsa-miR-3134	0	0	0	0	0	0	0	0	0	0	0	0	0	0	0	0	0	0	0	0	0	0	0	0	0	0	0	0	0	0	0	0	0	0	0	0	0	0	0	0	0	0	0	0	0	0	0	0	0
hsa-miR-3135a	0	2	0	0	0	0	0	0	1	0	0	0	0	0	0	1	1	0	0	3	0	1	0	0	0	0	1	4	2	0	1	0	0	3	1	0	0	6	0	0	0	2	0	0	0	2	2	0	0
hsa-miR-3135b	0	0	0	0	0	0	0	0	0	0	0	0	0	0	0	0	0	0	0	0	0	0	0	0	0	0	0	0	0	0	0	0	0	0	0	0	0	0	0	0	0	0	0	0	0	0	0	0	0
hsa-miR-3136-3p	0	0	0	0	0	0	0	0	0	0	0	0	0	0	0	0	0	0	0	0	0	0	0	0	0	0	0	0	0	0	0	0	0	0	0	0	0	0	0	0	0	0	0	0	0	0	0	0	0
hsa-miR-3136-5p	0	0	0	0	0	0	0	0	0	0	0	0	0	0	0	0	0	0	0	0	0	0	0	0	0	0	0	0	0	0	0	0	0	0	0	0	0	0	0	0	0	0	0	0	0	0	0	0	0
hsa-miR-3137	0	0	0	0	0	0	0	0	0	0	0	0	0	0	0	0	0	0	0	0	0	0	0	0	0	0	0	0	0	0	0	0	0	0	0	0	0	0	0	0	0	0	0	0	0	0	0	0	0
hsa-miR-3138	0	0	1	4	2	0	2	4	0	1	2	1	1	14	1	4	20	0	2	4	2	1	7	3	3	3	4	2	2	2	2	0	4	7	1	5	3	4	0	4	3	1	4	2	3	4	0	3	1
hsa-miR-3139	0	0	0	0	0	0	0	0	0	0	0	0	0	0	0	0	0	0	0	0	0	0	0	0	0	0	0	0	0	0	0	0	0	1	0	0	0	0	0	0	0	0	0	0	0	0	0	0	0
hsa-miR-3140-3p	2	3	2	0	0	0	2	0	2	0	0	2	0	0	0	0	0	1	4	1	2	1	0	1	0	0	0	1	2	1	2	0	0	2	2	1	0	0	0	0	1	0	0	0	0	0	3	0	1
hsa-miR-3140-5p	0	0	0	0	0	0	0	0	0	0	0	0	0	0	0	0	0	0	0	0	0	0	0	0	0	0	0	0	0	1	0	0	0	0	0	0	0	0	0	0	0	0	0	0	0	0	0	0	0
hsa-miR-3141	0	0	0	0	0	0	0	0	0	0	0	0	0	0	0	0	0	0	0	0	0	0	0	0	0	0	0	0	0	0	0	0	0	0	0	0	0	0	0	0	0	0	0	0	0	0	0	0	0
hsa-miR-3142	0	0	0	0	0	0	0	0	0	0	0	0	0	0	0	0	0	0	0	0	0	0	0	0	0	0	0	0	0	0	0	0	0	0	0	0	0	0	0	0	0	0	0	0	0	0	0	0	0
hsa-miR-3143	0	0	3	1	0	0	1	1	7	0	1	1	3	2	2	2	0	0	1	0	1	0	0	1	2	0	1	1	3	2	2	1	0	6	5	0	2	3	0	4	1	1	0	1	0	0	6	0	0
hsa-miR-3144-3p	0	0	0	0	0	0	0	0	0	0	0	0	0	0	0	0	0	0	0	0	0	0	0	0	0	0	0	0	0	0	0	0	0	0	0	0	0	0	0	0	0	0	0	0	0	0	0	0	0
hsa-miR-3144-5p	0	0	0	0	0	0	0	0	0	0	0	0	0	0	0	0	0	0	0	0	0	0	0	0	0	0	0	0	0	0	0	0	0	0	0	0	0	0	0	0	0	0	0	0	0	0	0	0	0
hsa-miR-3145-3p	0	0	0	0	0	0	0	0	0	0	0	0	0	0	0	0	0	0	0	0	0	0	0	0	0	0	0	0	0	0	0	0	0	0	0	0	0	0	0	0	0	0	0	0	0	0	0	0	0
hsa-miR-3145-5p	0	0	0	0	0	0	0	0	0	0	0	0	0	0	0	0	0	0	0	0	0	0	0	0	0	0	0	0	0	0	0	0	0	0	0	0	0	0	0	0	0	0	0	0	0	0	0	0	0
hsa-miR-3146	1	1	0	1	1	0	0	3	0	0	0	1	0	0	1	0	0	0	1	0	1	0	0	0	0	0	0	0	0	0	0	0	0	0	1	0	0	0	0	0	0	0	0	0	0	0	0	0	0
hsa-miR-3147	0	0	0	0	0	0	0	0	0	0	0	0	0	0	0	0	0	0	0	0	0	0	0	0	0	0	0	0	0	0	0	0	0	0	0	0	0	0	0	0	0	0	0	0	0	0	0	0	0
hsa-miR-3148	0	0	0	0	0	0	0	0	0	0	0	0	0	0	0	0	0	0	0	1	0	0	0	0	0	0	0	0	0	0	0	0	0	0	0	0	0	0	0	0	0	0	0	0	0	0	0	0	0
hsa-miR-3149	1	0	1	0	0	0	0	0	0	0	0	0	0	1	0	0	0	0	0	0	0	0	0	0	0	0	0	1	0	0	0	0	0	0	0	0	0	0	0	0	0	0	0	0	0	1	0	0	1
hsa-miR-3150a-3p	0	0	0	0	0	0	0	0	0	0	0	0	0	0	0	0	0	0	0	0	0	0	0	0	0	0	0	0	0	0	0	0	0	0	0	0	0	0	0	0	0	0	0	0	0	0	0	0	0
hsa-miR-3150a-5p	0	0	0	0	0	0	1	0	0	0	0	0	0	0	0	0	0	0	0	0	0	0	0	0	1	0	0	0	1	0	0	0	0	1	0	0	0	0	0	0	0	0	0	0	0	0	0	0	0
hsa-miR-3150b-3p	2	5	10	2	3	3	2	12	5	5	3	5	3	0	3	2	0	4	13	4	4	2	0	4	3	2	0	2	0	9	2	3	2	0	6	1	1	0	1	1	2	10	2	0	0	0	2	2	2
hsa-miR-3150b-5p	0	0	0	0	0	0	0	0	0	0	0	0	0	0	0	0	0	0	0	0	0	0	0	0	0	0	0	0	0	0	0	0	0	0	0	0	0	0	0	0	0	0	0	0	0	0	0	0	0
hsa-miR-3151-3p	0	0	0	0	0	0	0	0	0	0	0	0	0	0	0	0	0	0	0	0	0	0	0	0	0	0	0	0	0	0	0	0	0	0	0	0	0	0	0	0	0	0	0	0	0	0	0	0	0
hsa-miR-3151-5p	0	0	0	0	0	0	0	1	0	0	0	0	0	0	0	0	0	0	0	0	0	0	0	0	0	0	0	0	0	0	0	0	0	0	0	0	0	1	0	0	0	0	0	0	0	0	0	0	0
hsa-miR-3152-3p	0	0	0	0	0	0	0	0	0	0	0	0	0	0	0	0	0	0	0	0	0	0	0	0	0	0	0	0	0	0	0	0	0	0	0	0	0	0	0	0	0	0	0	0	0	0	0	0	0
hsa-miR-3152-5p	0	0	0	0	0	0	0	0	0	0	0	0	0	0	0	0	0	0	0	0	0	0	0	0	0	0	0	0	0	0	0	0	0	0	0	0	0	0	0	0	0	0	0	0	0	0	0	0	0
hsa-miR-3153	0	0	0	0	0	0	0	0	0	0	0	0	0	0	0	0	0	0	0	0	0	0	0	0	0	0	0	0	0	0	0	0	0	0	0	0	0	0	0	0	0	0	0	0	0	0	0	0	0
hsa-miR-3154	0	0	0	0	0	0	0	0	0	0	0	0	0	0	0	0	1	0	0	1	0	0	0	0	0	0	0	0	0	0	0	0	0	0	0	0	0	0	0	1	0	0	0	0	0	0	0	0	0
hsa-miR-3155a	0	0	0	0	0	0	0	0	0	0	0	0	0	0	0	0	0	1	0	0	0	0	0	2	0	0	0	0	0	0	0	0	0	0	0	0	0	0	0	0	0	0	0	0	0	0	0	0	0
hsa-miR-3155b	0	0	0	0	0	0	0	0	0	0	0	0	0	0	0	0	0	0	0	0	0	0	0	0	0	0	0	0	0	0	0	0	0	0	0	0	0	0	0	0	0	0	0	0	0	0	0	0	0
hsa-miR-3156-3p	0	0	0	0	0	0	0	0	0	0	0	0	0	0	0	0	0	0	0	0	0	0	0	0	0	0	0	0	0	0	0	0	0	0	0	0	0	0	0	0	0	0	0	0	0	0	0	0	0
hsa-miR-3156-5p	0	0	0	0	0	0	0	0	0	0	0	0	0	0	0	0	0	0	0	0	0	0	0	0	0	0	0	0	0	0	0	0	0	0	0	0	0	0	0	0	0	0	0	0	0	0	0	0	0
hsa-miR-3157-3p	1	1	2	0	0	0	2	1	1	0	2	0	0	0	0	0	1	0	0	0	0	0	0	1	0	0	1	0	1	1	0	0	0	1	1	1	0	1	0	0	1	0	0	0	0	0	1	1	2
hsa-miR-3157-5p	0	0	0	0	0	0	0	0	0	0	0	0	1	0	0	0	0	0	0	0	0	0	0	0	0	0	0	0	0	0	0	0	0	0	0	0	0	0	0	0	0	0	0	0	0	0	0	0	0
hsa-miR-3158-3p	69	168	45	35	34	27	107	47	67	16	32	24	20	45	54	22	98	21	17	67	13	34	70	43	21	31	55	153	249	17	31	13	5	293	16	19	62	209	11	58	30	37	26	84	15	90	130	23	11
hsa-miR-3158-5p	0	0	0	0	0	0	0	0	0	0	0	0	0	0	0	0	0	0	0	0	0	0	0	0	0	0	0	0	0	0	0	0	0	0	0	0	0	0	0	0	0	0	0	0	0	0	0	0	0
hsa-miR-3159	0	0	0	0	0	0	0	0	0	0	0	0	0	0	0	0	0	0	0	0	0	0	0	0	0	0	0	0	0	0	0	0	0	0	0	0	0	0	0	0	0	0	0	0	0	0	0	0	0
hsa-miR-3160-3p	0	0	0	0	0	0	0	0	0	0	0	0	0	0	0	1	0	0	1	0	1	0	0	0	0	0	0	0	0	0	0	0	0	0	0	0	0	0	0	0	0	0	0	0	0	0	0	0	0
hsa-miR-3160-5p	0	0	0	0	0	0	0	0	0	0	0	0	0	0	0	0	0	0	0	0	0	0	0	0	0	0	0	0	0	0	0	0	0	0	0	0	0	0	0	0	0	0	0	0	0	0	0	0	0
hsa-miR-3161	0	0	0	0	0	0	0	4	0	0	1	0	0	0	0	0	0	0	0	1	0	0	0	0	0	0	0	0	0	2	0	0	0	0	0	0	0	0	0	0	0	0	0	0	0	0	0	0	0
hsa-miR-3162-3p	0	0	0	0	0	0	0	0	0	0	0	0	0	0	0	0	0	0	0	0	0	0	0	0	0	0	0	0	0	0	0	0	0	0	0	0	0	0	0	0	0	0	0	0	0	0	0	0	0
hsa-miR-3162-5p	0	0	0	0	0	0	0	0	0	0	0	0	0	0	0	0	0	0	0	0	0	0	0	0	0	0	0	0	0	0	0	0	0	0	0	0	0	0	0	0	0	0	0	0	0	0	0	0	0
hsa-miR-3163	0	0	0	0	0	0	0	0	0	0	0	0	0	0	0	0	0	0	0	1	1	0	0	0	0	0	0	1	0	0	0	0	0	0	0	0	0	1	0	0	0	0	0	0	0	0	1	0	0
hsa-miR-3164	0	0	1	1	0	0	2	2	0	0	0	0	1	0	0	0	0	0	1	1	1	0	0	0	0	0	0	3	2	0	0	0	0	1	1	0	1	2	0	1	0	0	0	0	0	0	2	0	0
hsa-miR-3165	0	0	0	0	0	0	0	0	0	0	0	0	0	0	0	0	0	0	0	0	0	0	0	0	0	0	0	0	0	0	0	0	0	0	0	0	0	0	0	0	0	0	0	0	0	0	0	0	0
hsa-miR-3166	0	0	0	0	0	0	0	0	0	0	0	0	0	0	0	0	0	0	0	0	0	0	0	0	0	0	0	0	0	0	0	0	0	0	0	0	0	0	0	0	0	0	0	0	0	0	0	0	0
hsa-miR-3167	0	0	0	0	0	0	0	0	0	0	0	0	0	0	0	0	0	0	0	0	0	0	0	0	0	0	0	0	0	0	0	0	0	0	0	0	0	0	0	0	0	0	0	0	0	0	0	0	0
hsa-miR-3168	0	0	0	0	0	0	0	0	0	0	0	0	0	1	0	0	1	0	0	0	0	0	0	0	0	0	0	0	0	0	0	0	0	0	0	0	0	0	0	0	0	0	0	0	0	0	0	0	0
hsa-miR-3169	0	0	0	0	0	0	0	0	0	0	0	0	0	0	0	0	0	0	0	0	0	0	0	0	0	0	0	0	0	0	0	0	0	0	0	0	0	0	0	0	0	0	0	0	0	0	0	0	0
hsa-miR-3170	0	0	0	0	0	0	0	0	0	0	0	0	0	0	0	0	0	0	0	0	0	0	0	0	0	0	0	0	0	0	0	0	0	0	0	0	0	0	0	0	0	0	0	0	0	0	0	0	0
hsa-miR-3171	0	0	0	0	0	0	0	0	0	0	0	0	0	0	0	0	0	0	0	0	0	0	0	0	0	0	0	0	0	0	0	0	0	0	0	0	0	0	0	0	0	0	0	0	0	0	0	0	0
hsa-miR-3173-3p	0	0	0	0	0	0	0	0	0	0	0	0	0	1	0	0	0	0	0	0	0	0	0	0	0	0	0	0	0	0	0	0	0	0	0	0	0	0	0	0	0	0	0	0	0	0	0	0	0
hsa-miR-3173-5p	0	1	0	0	1	4	0	0	0	2	0	1	1	3	0	0	3	1	0	0	0	0	0	0	0	0	0	6	2	0	0	1	0	1	0	0	1	1	0	0	1	0	0	1	0	0	2	0	2
hsa-miR-3174	0	0	0	0	0	0	0	0	0	0	0	0	1	0	0	0	0	1	0	0	0	0	1	1	2	0	0	1	0	0	0	0	0	0	0	0	0	0	0	0	1	0	0	0	0	0	0	0	0
hsa-miR-3175	0	0	0	0	1	0	0	0	0	0	0	0	0	0	0	0	0	0	0	0	0	0	0	1	0	0	0	0	0	0	0	0	0	0	0	0	0	0	0	0	0	0	0	0	0	0	0	0	0
hsa-miR-3176	0	1	1	1	1	0	0	2	1	1	0	0	0	0	0	0	0	0	0	1	6	0	0	0	0	1	1	2	1	0	0	0	0	5	1	1	1	1	0	1	0	0	0	0	0	1	2	1	0
hsa-miR-3177-3p	5	8	2	2	10	10	5	8	1	6	4	7	2	3	6	2	2	3	5	3	0	4	6	0	4	2	7	8	9	6	2	5	2	13	3	3	3	4	4	5	5	3	7	5	5	4	5	2	5
hsa-miR-3177-5p	0	0	0	0	0	0	0	0	0	0	0	0	0	0	0	0	0	0	0	0	0	0	0	0	0	0	0	0	0	0	0	0	0	0	0	0	0	0	0	0	0	0	0	0	0	0	0	0	0
hsa-miR-3178	0	0	0	0	0	0	0	0	0	0	0	0	0	0	0	0	0	0	0	0	0	0	0	0	0	0	0	0	0	0	0	0	0	0	0	0	0	0	0	0	0	0	0	0	0	0	0	0	0
hsa-miR-3179	1	0	0	0	0	0	0	0	0	0	0	0	0	0	0	0	0	0	0	1	0	1	0	0	0	0	0	0	1	0	0	0	0	0	0	0	0	1	0	0	0	1	0	0	0	0	0	0	0
hsa-miR-3180	0	0	0	0	0	0	0	0	0	0	0	0	0	0	0	0	0	0	0	0	0	0	0	0	0	0	0	0	0	0	0	0	0	0	0	0	0	0	0	0	0	0	0	0	0	0	0	0	0
hsa-miR-3180-3p	0	0	0	0	0	0	0	0	0	0	0	0	1	2	1	0	4	1	0	2	0	0	0	1	0	1	0	0	1	0	1	1	0	0	1	0	0	0	0	0	1	0	1	0	0	0	0	0	0
hsa-miR-3180-5p	0	0	0	0	0	0	0	0	0	0	0	0	0	0	0	0	0	0	0	0	0	0	0	0	0	0	0	0	0	0	0	0	0	0	0	0	0	0	0	0	0	0	0	0	0	0	0	0	0
hsa-miR-3181	0	0	0	0	0	0	0	1	0	0	0	0	0	0	0	0	0	0	0	0	0	0	0	0	0	0	0	0	0	0	0	0	0	0	0	0	0	0	0	0	0	0	0	0	0	0	0	0	0
hsa-miR-3182	0	0	1	0	1	1	1	2	0	1	0	1	1	1	1	3	0	0	0	1	0	3	1	1	1	2	2	0	1	0	3	2	2	0	0	0	3	0	0	0	1	0	0	1	1	0	1	1	0
hsa-miR-3183	0	0	0	0	0	0	0	0	0	0	0	0	0	0	0	0	0	0	0	0	0	0	0	0	0	0	0	0	0	0	0	0	0	0	0	0	0	0	0	0	0	0	0	0	0	0	0	0	0
hsa-miR-3184-3p	0	0	0	0	0	0	0	0	0	0	0	0	0	0	0	0	0	0	0	0	0	0	0	0	0	0	0	0	0	0	0	0	0	0	0	0	0	0	0	0	0	0	0	0	0	0	0	0	0
hsa-miR-3184-5p	0	0	0	0	0	0	0	0	0	0	0	0	0	0	0	0	0	0	0	0	0	0	0	0	0	0	0	0	0	0	0	0	0	0	0	0	0	0	0	0	0	0	0	0	0	0	0	0	0
hsa-miR-3185	0	0	0	0	0	0	0	0	0	0	0	0	0	0	0	0	0	0	0	0	0	0	0	0	0	0	0	0	0	0	0	0	0	0	0	0	0	0	0	0	0	0	0	0	0	0	0	0	0
hsa-miR-3186-3p	0	0	0	0	0	0	0	0	0	0	0	0	0	0	0	0	0	0	0	1	0	0	0	0	0	0	0	0	0	1	0	0	0	0	0	0	0	0	0	0	0	0	0	0	0	0	0	0	0
hsa-miR-3186-5p	0	0	0	0	0	0	0	0	0	0	0	0	0	0	0	0	0	0	0	0	0	0	0	0	0	0	0	0	0	0	0	0	0	0	0	0	0	0	0	0	0	0	0	0	0	1	0	0	0
hsa-miR-3187-3p	0	0	2	0	0	1	1	0	0	1	0	0	0	2	0	0	1	1	0	3	0	1	0	0	0	0	0	0	1	0	0	1	0	4	2	2	2	0	1	1	0	0	0	1	0	0	1	0	1
hsa-miR-3187-5p	0	0	0	0	0	0	0	0	0	0	0	0	0	0	0	1	0	0	0	0	0	0	0	0	0	0	0	0	0	0	0	0	0	0	0	0	0	0	0	0	0	0	0	0	0	0	0	0	0
hsa-miR-3188	0	0	0	0	0	0	1	0	0	0	0	0	0	0	0	0	0	0	0	0	1	0	0	0	0	0	0	0	0	0	0	0	0	0	0	0	0	0	0	0	0	0	0	0	0	0	0	0	0
hsa-miR-3189-3p	0	0	0	0	0	0	0	0	0	0	0	0	0	0	0	0	0	0	0	0	0	0	0	0	0	0	0	0	0	0	0	0	0	0	0	0	0	0	0	0	0	0	0	0	0	0	0	0	0
hsa-miR-3189-5p	0	0	0	0	0	0	0	0	0	0	0	0	0	0	0	0	0	0	0	0	0	0	0	0	0	0	0	0	0	0	0	0	0	0	0	0	0	0	0	0	0	0	0	0	0	0	0	0	0
hsa-miR-3190-3p	0	1	0	0	0	0	0	0	0	1	1	2	0	0	1	0	0	1	2	0	5	0	0	0	0	0	1	0	0	1	0	1	1	0	0	0	1	1	0	1	0	0	0	0	0	1	0	0	1
hsa-miR-3190-5p	0	0	0	0	0	0	0	0	0	0	0	0	0	0	0	0	0	0	0	0	0	0	0	0	0	0	0	0	0	0	0	0	0	0	0	0	0	0	0	0	0	0	0	0	0	0	0	0	0
hsa-miR-3191-3p	0	0	0	0	0	1	0	0	0	1	0	0	0	0	0	0	0	0	0	2	0	0	0	0	1	1	0	0	0	0	0	0	0	0	0	0	0	0	0	0	0	0	0	0	0	0	0	0	1
hsa-miR-3191-5p	0	0	0	0	0	0	0	0	0	0	0	0	0	0	0	0	0	0	0	0	0	0	0	0	0	0	0	0	0	0	0	0	0	0	0	0	0	0	0	0	0	0	0	0	0	0	0	0	0
hsa-miR-3192-3p	0	0	0	0	0	0	0	0	0	0	0	0	0	0	0	0	0	0	0	0	0	0	0	0	0	0	0	0	0	0	0	0	0	0	0	0	0	0	0	0	0	0	0	0	0	0	0	0	0
hsa-miR-3192-5p	0	0	0	0	0	1	0	0	0	0	0	0	0	0	0	0	0	0	0	0	0	0	0	0	0	0	0	0	0	0	0	0	0	0	0	0	0	0	0	0	0	1	0	0	0	1	0	0	0
hsa-miR-3193	0	0	0	0	0	0	0	0	0	0	0	0	0	0	0	0	0	0	0	0	0	0	0	0	0	0	0	0	0	0	0	0	0	0	0	0	0	1	0	0	0	0	0	0	0	0	0	0	0
hsa-miR-3194-3p	0	0	0	0	0	0	0	0	0	0	0	0	0	0	0	0	0	0	0	0	0	0	0	0	0	0	0	0	0	0	0	0	0	1	0	0	0	0	0	0	0	0	0	0	0	0	0	0	0
hsa-miR-3194-5p	0	0	0	0	0	0	0	0	0	0	0	0	0	0	0	0	0	0	0	0	0	0	0	0	0	0	0	0	0	0	0	0	0	0	0	0	0	0	0	0	0	0	0	0	0	0	0	0	0
hsa-miR-3195	0	0	0	0	0	0	0	1	0	0	0	0	0	0	0	0	0	0	0	0	0	0	0	0	0	0	0	0	0	0	0	0	0	0	0	0	0	0	0	0	0	0	0	0	0	0	0	0	0
hsa-miR-3196	0	0	0	0	0	0	0	0	0	0	0	0	0	0	0	0	0	0	0	0	0	0	0	0	0	0	0	0	0	0	0	0	0	0	0	0	0	0	0	0	0	0	0	0	0	0	0	0	0
hsa-miR-3197	0	0	0	0	0	0	0	0	0	0	0	0	0	0	0	0	0	0	0	0	0	0	0	0	0	0	0	0	0	0	0	25	0	0	0	0	0	0	0	0	0	0	0	0	0	0	0	0	0
hsa-miR-3198	0	0	0	0	0	1	0	0	0	0	0	0	1	0	0	0	1	0	0	1	3	2	1	0	2	0	0	0	1	0	0	0	0	0	0	0	0	0	0	0	0	1	0	1	0	0	0	0	0
hsa-miR-3199	0	0	0	0	0	0	0	0	0	0	0	1	0	0	0	0	0	0	0	1	3	0	0	1	0	0	0	0	0	0	0	0	0	0	0	0	0	0	0	1	0	0	0	0	0	0	0	0	0
hsa-miR-3200-3p	0	0	0	0	0	0	0	0	1	0	0	1	0	0	0	0	1	0	0	0	0	0	0	0	0	0	0	1	0	0	0	0	0	0	0	0	0	1	0	0	0	0	0	0	0	0	0	0	0
hsa-miR-3200-5p	0	0	2	0	0	0	0	0	0	0	0	0	0	0	1	1	0	0	0	0	0	0	0	0	0	0	0	2	0	0	0	0	0	0	0	0	0	2	0	0	0	0	0	0	0	0	0	0	0
hsa-miR-3201	0	0	0	0	0	0	0	0	0	0	0	0	0	0	0	0	0	0	0	0	0	0	0	0	0	0	0	0	0	0	0	0	0	0	0	0	0	0	0	0	0	0	0	0	0	0	0	0	0
hsa-miR-3202	1	0	0	0	0	0	0	0	0	0	0	0	0	0	0	0	0	0	0	0	0	0	0	0	0	0	0	1	0	0	0	0	0	0	0	0	0	0	0	1	0	0	0	0	0	0	0	0	0
hsa-miR-3529-3p	0	0	0	0	0	0	0	0	0	0	0	0	0	0	0	0	0	0	0	0	0	0	0	0	0	0	0	0	0	0	0	0	0	0	0	0	0	0	0	0	0	0	0	0	0	0	0	0	0
hsa-miR-3529-5p	0	0	0	0	0	0	0	0	0	0	0	0	0	0	0	0	0	0	0	0	0	0	0	0	0	0	0	0	0	0	0	0	0	0	0	0	0	0	0	0	0	0	0	0	0	0	0	0	0
hsa-miR-3591-3p	0	0	0	0	0	0	0	0	0	0	0	0	0	0	0	0	0	0	0	0	0	0	0	0	0	0	0	0	0	0	0	0	0	0	0	0	0	0	0	0	0	0	0	0	0	0	0	0	0
hsa-miR-3591-5p	0	0	0	0	0	0	0	0	0	0	0	0	0	0	0	0	0	0	0	1	0	0	4	0	0	0	1	0	0	0	0	0	0	0	0	0	0	0	0	0	1	0	1	0	0	0	0	0	0
hsa-miR-3605-3p	0	7	6	1	6	13	10	37	2	10	6	8	10	18	4	12	16	11	1	7	0	7	3	3	5	9	3	11	9	2	3	10	0	8	5	0	9	5	3	5	4	0	4	15	4	19	9	1	17
hsa-miR-3605-5p	3	4	5	13	3	0	6	14	0	3	3	3	8	19	2	1	23	2	3	12	7	3	7	17	9	6	6	9	10	13	4	3	10	13	9	11	8	7	2	14	8	9	14	4	2	9	9	8	6
hsa-miR-3606-3p	0	0	0	0	0	0	0	0	0	0	0	0	0	0	0	0	0	0	0	0	0	0	0	0	0	0	0	0	0	0	0	0	0	0	0	0	0	0	0	0	0	0	0	0	0	0	0	0	0
hsa-miR-3606-5p	0	0	0	0	0	0	0	0	0	0	0	0	0	0	0	0	0	0	0	0	0	0	0	0	0	0	0	0	0	0	0	0	0	0	0	0	0	0	0	0	0	0	0	0	0	0	0	0	0
hsa-miR-3607-3p	0	0	0	0	0	0	0	0	0	0	0	0	0	0	0	0	0	0	0	0	0	0	0	0	0	0	0	0	0	0	0	0	0	0	0	0	0	0	0	0	0	0	0	0	0	0	0	0	0
hsa-miR-3607-5p	0	0	0	0	0	0	0	0	0	0	0	0	0	0	0	0	0	0	0	0	0	0	0	0	0	0	0	0	0	0	0	0	0	0	0	0	0	0	0	0	0	0	0	0	0	0	0	0	0
hsa-miR-3609	0	0	0	0	0	0	0	0	0	0	0	0	0	0	0	0	0	0	0	0	0	0	0	0	0	0	0	0	0	0	0	0	0	0	0	0	0	0	0	0	0	0	0	0	0	0	0	0	0
hsa-miR-3610	0	0	0	0	0	0	0	0	0	0	0	0	0	0	0	0	0	0	0	0	0	0	0	0	0	0	0	0	0	0	0	0	0	0	0	0	0	0	0	0	0	0	0	0	0	0	0	0	0
hsa-miR-3611	0	0	0	0	0	0	0	0	0	0	0	0	0	0	0	0	0	0	0	0	0	0	0	0	0	0	0	0	0	0	0	0	0	0	0	0	0	0	0	0	0	0	0	0	0	0	0	0	0
hsa-miR-3612	0	0	0	0	0	0	0	0	0	0	0	0	0	0	0	0	0	0	0	0	0	0	0	0	0	0	0	0	0	0	0	0	0	0	0	0	0	0	0	0	0	0	0	0	0	0	0	0	0
hsa-miR-3613-3p	0	0	0	0	0	0	0	0	0	0	0	0	0	0	0	0	0	0	0	0	0	0	0	0	0	0	0	0	0	0	0	0	0	0	0	0	0	0	0	0	0	0	0	0	0	0	0	0	0
hsa-miR-3613-5p	12	22	14	9	11	10	11	6	16	7	21	10	17	15	15	14	18	8	14	29	7	10	8	11	19	8	25	16	57	10	22	12	18	51	27	14	17	23	1	13	21	17	7	4	4	10	95	6	5
hsa-miR-3614-3p	0	0	0	0	0	0	0	0	0	0	0	0	0	0	0	0	0	0	0	0	2	0	0	0	0	0	0	0	0	0	0	0	0	0	0	0	0	0	0	0	0	0	0	0	0	0	0	0	0
hsa-miR-3614-5p	6	5	2	2	2	8	4	3	0	2	2	1	3	0	14	2	0	5	3	2	16	3	8	5	9	7	4	2	3	10	0	21	2	3	3	5	1	2	3	1	7	2	12	1	0	4	1	2	7
hsa-miR-3615	160	649	660	381	462	368	542	733	135	385	533	478	907	1201	631	410	1796	532	1842	881	1521	510	364	709	441	349	283	456	651	920	361	645	205	802	523	400	321	516	263	563	366	169	490	466	145	447	519	362	454
hsa-miR-3616-3p	0	0	0	0	0	0	0	0	0	0	0	0	0	0	0	0	0	0	0	0	0	0	0	0	0	0	0	0	0	0	0	0	0	0	0	0	0	0	0	0	0	0	0	0	0	0	0	0	0
hsa-miR-3616-5p	0	0	0	0	0	0	0	0	0	0	0	0	0	0	0	0	0	0	0	0	0	0	0	0	0	0	0	0	0	0	0	0	0	0	0	0	0	0	0	0	0	0	0	0	0	0	0	0	0
hsa-miR-3617-3p	0	0	0	0	0	0	0	0	0	0	0	0	0	0	0	0	0	0	0	0	0	0	0	0	0	0	0	0	0	0	0	0	0	0	0	0	0	0	0	0	0	0	0	0	0	0	0	0	0
hsa-miR-3617-5p	0	0	0	0	0	1	0	0	0	1	0	1	0	0	0	0	0	0	0	0	0	0	0	0	0	0	1	0	0	0	0	0	0	0	0	0	0	0	0	0	0	0	0	0	0	0	0	0	0
hsa-miR-3618	0	0	0	0	0	0	0	0	0	0	0	0	0	0	0	0	0	0	0	0	0	0	0	0	0	0	0	0	0	0	0	0	0	0	0	0	0	0	0	0	0	0	0	0	0	0	0	0	0
hsa-miR-3619-3p	0	0	0	0	0	0	0	0	0	0	0	0	0	0	0	0	0	0	0	0	0	0	0	0	0	0	0	0	0	0	0	0	0	0	0	0	0	0	0	0	0	0	0	0	0	0	0	0	0
hsa-miR-3619-5p	0	0	0	0	0	0	0	0	0	0	0	0	0	0	0	0	0	0	0	0	0	0	0	0	0	0	0	0	0	0	0	0	0	0	0	0	0	0	0	0	0	0	0	0	0	0	0	0	0
hsa-miR-3620-3p	0	0	0	0	0	0	0	0	0	0	0	0	0	0	0	0	0	0	0	0	1	0	0	0	0	0	0	0	0	0	0	0	0	0	0	0	0	0	0	0	0	0	0	0	0	0	0	0	0
hsa-miR-3620-5p	0	0	0	0	0	0	0	0	0	0	0	0	0	0	0	0	0	0	1	0	0	0	0	0	0	0	0	0	1	0	0	0	0	1	0	0	0	0	0	0	0	0	0	0	0	0	0	0	0
hsa-miR-3621	0	0	0	0	0	0	0	0	0	0	0	0	0	0	0	0	0	0	0	0	0	0	0	0	0	0	0	0	0	0	0	0	0	0	0	0	0	0	0	0	0	0	0	0	0	0	0	0	0
hsa-miR-3622a-3p	0	0	0	0	0	0	0	0	0	0	0	0	0	0	0	0	0	0	0	0	0	0	0	0	0	0	0	0	0	0	0	0	0	0	0	0	0	0	0	0	0	0	0	0	0	0	0	0	0
hsa-miR-3622a-5p	0	0	0	0	0	0	0	1	0	0	0	0	0	0	0	1	0	1	0	0	0	0	0	0	0	0	0	0	0	0	0	0	0	0	0	0	0	0	0	0	0	0	0	0	0	1	0	0	0
hsa-miR-3622b-3p	0	0	0	0	0	0	0	0	0	0	0	0	0	0	0	0	0	0	0	0	0	0	0	0	0	0	0	0	0	0	0	0	0	0	0	0	0	0	0	0	0	0	0	0	0	0	0	0	0
hsa-miR-3622b-5p	0	0	0	0	0	0	0	0	0	0	0	0	0	0	0	0	0	0	0	0	0	0	0	0	0	0	0	0	0	0	0	0	0	0	0	0	0	0	0	0	0	0	0	0	0	0	0	0	0
hsa-miR-3646	0	0	0	0	0	0	0	0	0	0	0	0	0	0	0	0	0	0	0	0	0	0	0	0	0	0	0	0	0	0	0	0	0	0	0	0	0	0	0	0	0	0	0	0	0	0	0	0	0
hsa-miR-3648	0	0	0	0	0	0	0	0	0	0	0	0	0	0	0	0	0	0	0	0	0	0	0	0	0	0	0	0	0	0	0	0	0	0	0	0	0	0	0	0	0	0	0	0	0	0	0	0	0
hsa-miR-3649	0	0	0	0	0	0	0	0	0	0	0	0	0	0	0	0	0	0	0	0	0	0	0	0	0	0	0	0	0	0	0	0	0	0	0	0	0	0	0	0	0	0	0	0	0	0	0	0	0
hsa-miR-3650	0	0	0	0	0	0	0	0	0	0	0	0	0	0	0	0	0	0	0	0	0	0	0	0	0	0	0	0	0	0	0	0	0	0	0	0	0	0	0	0	0	0	0	0	0	0	0	0	0
hsa-miR-3651	0	0	0	0	0	0	0	0	0	0	0	0	0	0	0	0	0	0	0	0	0	0	0	0	0	0	0	0	0	0	0	0	0	0	0	0	0	0	0	0	0	0	0	0	0	0	0	0	0
hsa-miR-3652	0	0	0	0	0	0	0	0	0	0	0	0	0	0	0	0	0	0	0	0	0	0	0	0	0	0	0	0	0	0	0	0	0	0	0	0	0	0	0	0	0	0	0	0	0	0	0	0	0
hsa-miR-3653	0	0	0	0	0	1	0	0	0	0	0	0	1	0	0	0	0	0	0	0	0	0	0	0	0	0	0	0	0	0	0	0	0	0	0	0	0	0	0	0	0	1	0	0	0	0	0	0	0
hsa-miR-3654	0	0	0	0	0	0	0	0	0	0	0	0	0	0	0	0	0	0	3	0	0	0	0	0	0	0	0	0	0	0	0	0	0	0	0	0	0	0	0	0	0	0	0	0	0	0	0	0	0
hsa-miR-3655	0	0	0	0	0	0	0	0	0	0	0	0	0	0	0	0	0	0	0	0	0	0	0	0	0	0	0	0	0	0	0	0	0	0	0	0	0	0	0	0	0	0	0	0	0	0	0	0	0
hsa-miR-3656	0	0	0	0	0	0	0	0	0	0	0	0	0	2	0	0	4	0	0	1	0	0	0	0	0	0	0	0	0	0	0	0	0	0	0	0	0	0	0	0	0	0	0	0	0	0	0	0	0
hsa-miR-3657	0	0	0	0	0	0	0	0	0	0	0	0	0	0	0	0	0	0	0	0	0	0	0	0	0	0	0	0	0	0	0	0	0	0	0	0	0	0	0	0	0	0	0	0	0	0	0	0	0
hsa-miR-3658	0	0	0	0	0	0	0	0	0	0	0	0	0	0	0	0	0	0	0	0	0	0	0	0	0	0	0	0	0	0	0	0	0	0	0	0	0	0	0	0	0	0	0	0	0	0	0	0	0
hsa-miR-3659	0	0	0	0	0	0	0	0	0	0	0	0	0	0	0	0	0	0	0	0	0	0	0	0	0	0	0	0	0	0	0	0	0	0	0	0	0	0	0	0	0	0	0	0	0	0	0	0	0
hsa-miR-3660	0	0	0	0	0	0	0	1	0	0	0	0	0	0	0	0	0	0	0	0	0	0	0	0	0	0	0	0	0	0	0	0	0	0	0	0	0	0	0	0	0	0	0	0	0	0	0	0	0
hsa-miR-3661	0	0	0	0	0	0	0	0	0	0	0	0	0	0	0	0	0	0	0	0	0	0	0	0	0	0	0	0	0	0	0	0	0	0	0	0	0	0	0	0	0	0	0	0	0	0	0	0	0
hsa-miR-3662	0	0	0	0	0	0	0	0	0	0	0	0	0	0	0	0	0	0	0	0	0	0	0	0	0	0	0	0	0	0	0	0	0	0	0	0	0	0	0	0	0	0	0	0	0	0	0	0	0
hsa-miR-3663-3p	0	0	0	0	0	0	0	0	0	0	0	0	0	0	0	0	0	0	0	0	0	0	0	0	0	0	0	0	0	0	0	0	0	0	0	0	0	0	0	0	0	0	0	0	0	0	0	0	0
hsa-miR-3663-5p	0	0	0	0	0	0	0	0	0	0	0	0	0	0	0	0	0	0	0	0	0	0	0	0	0	0	0	0	0	0	0	0	0	0	0	0	0	0	0	0	0	0	0	0	0	0	0	0	0
hsa-miR-3664-3p	0	0	0	0	0	0	0	0	0	0	0	0	0	0	0	0	0	0	0	0	2	0	0	0	0	0	0	0	0	0	0	0	0	0	0	0	0	0	0	0	0	0	0	0	0	0	0	0	0
hsa-miR-3664-5p	0	0	0	0	0	0	0	0	0	0	0	0	0	0	0	0	0	0	0	0	0	0	0	0	0	0	0	0	0	0	0	0	0	0	0	0	0	0	0	0	0	0	0	0	0	0	0	0	0
hsa-miR-3665	0	0	0	0	0	0	0	0	0	0	0	0	0	0	0	0	0	0	0	0	0	0	0	0	0	0	0	0	0	0	0	0	0	0	0	0	0	0	0	0	0	0	0	0	0	0	0	0	0
hsa-miR-3666	0	0	0	0	0	0	0	0	0	0	0	0	0	0	0	0	0	0	0	0	0	0	0	0	0	0	0	0	0	0	0	0	0	0	0	0	0	0	0	0	0	0	0	0	0	0	0	0	0
hsa-miR-3667-3p	0	0	0	0	0	0	0	0	0	0	0	0	0	0	0	0	0	0	0	0	0	0	0	0	0	0	0	0	0	0	0	0	0	0	0	0	0	0	0	0	0	0	0	0	0	0	0	0	0
hsa-miR-3667-5p	0	0	0	0	0	0	0	0	1	0	0	0	0	0	0	0	1	0	0	0	0	0	0	0	0	0	0	0	0	0	0	0	0	0	0	0	0	0	0	0	0	0	0	0	0	0	0	0	0
hsa-miR-3668	0	0	0	0	0	0	0	0	0	0	0	0	0	0	0	0	0	0	0	0	0	0	0	0	0	0	0	0	0	0	0	0	0	0	0	0	0	0	0	0	0	0	0	0	0	0	0	0	0
hsa-miR-3669	0	0	0	0	0	0	0	0	0	0	0	0	0	0	0	0	0	0	0	0	0	0	0	0	0	0	0	0	0	0	0	0	0	0	0	0	0	0	0	0	0	0	0	0	0	0	0	0	0
hsa-miR-3670	0	0	0	0	0	0	0	0	0	0	0	0	0	0	0	0	0	0	0	0	0	0	0	0	0	0	0	0	0	0	0	0	0	0	0	0	0	0	0	0	0	0	0	0	0	0	0	0	0
hsa-miR-3671	0	0	0	0	0	0	0	0	0	0	0	0	0	0	0	0	0	0	0	0	0	0	0	0	0	0	0	0	0	0	0	0	0	0	0	0	0	0	0	0	0	0	0	0	0	0	0	0	0
hsa-miR-3672	0	0	0	0	0	0	0	0	0	0	0	0	0	0	0	0	0	0	0	0	0	0	0	0	0	0	0	0	0	0	0	0	0	0	0	0	0	0	0	0	0	0	0	0	0	0	0	0	0
hsa-miR-3673	0	0	0	0	0	0	0	0	0	0	0	0	0	0	0	0	0	0	0	0	0	0	0	0	0	0	0	0	0	0	0	0	0	0	0	0	0	0	0	0	0	0	0	0	0	0	0	0	0
hsa-miR-3674	0	0	0	0	0	0	0	0	0	0	0	0	0	0	0	0	0	0	0	0	0	0	0	0	0	0	0	0	0	0	0	0	0	0	0	0	0	0	0	0	0	0	0	0	0	0	0	0	0
hsa-miR-3675-3p	0	0	0	0	0	0	0	0	0	0	0	0	0	0	0	0	0	0	0	0	0	0	0	0	0	0	0	0	0	0	0	0	0	0	0	0	0	0	0	0	0	0	0	0	0	0	0	0	0
hsa-miR-3675-5p	0	0	0	0	1	0	0	0	0	0	0	0	0	0	0	0	0	0	0	0	0	0	0	0	0	0	0	0	0	0	0	0	0	0	0	0	0	0	0	0	0	0	0	0	0	0	0	0	0
hsa-miR-3677-3p	0	0	0	0	0	0	0	0	0	1	0	0	0	0	0	0	0	0	0	0	0	0	0	0	0	0	0	0	0	0	0	0	0	0	0	0	0	0	0	0	0	0	0	0	0	0	0	0	0
hsa-miR-3677-5p	0	0	0	0	0	0	0	0	0	0	0	0	0	0	0	0	0	0	0	0	0	0	0	0	0	0	0	0	0	0	0	0	0	0	0	0	0	0	0	0	0	0	0	0	0	0	0	0	0
hsa-miR-3678-3p	0	0	0	0	0	0	0	0	0	0	0	0	0	0	0	0	0	0	0	0	0	0	0	0	0	0	0	0	0	0	0	0	0	0	0	0	0	0	0	0	0	0	0	0	0	0	0	0	0
hsa-miR-3678-5p	0	0	0	0	0	0	0	0	0	0	0	0	0	0	0	1	0	0	0	0	0	0	0	0	0	0	0	0	0	0	0	0	0	0	0	0	0	0	0	0	0	0	0	0	0	0	0	0	0
hsa-miR-3679-3p	0	0	0	0	0	0	0	0	0	0	0	0	0	0	0	0	0	0	0	0	0	0	0	0	0	0	0	0	0	0	0	0	0	0	0	0	0	0	0	0	0	0	0	0	0	0	0	0	0
hsa-miR-3679-5p	3	1	2	4	1	0	1	11	1	2	1	0	0	5	2	5	0	1	5	4	18	1	3	6	2	4	2	3	2	6	1	4	8	5	4	10	3	1	1	3	4	2	3	0	1	5	1	1	5
hsa-miR-3680-3p	0	0	0	0	0	0	0	0	0	0	0	0	0	0	0	0	1	0	0	0	0	0	0	0	0	0	0	0	0	0	0	0	0	0	0	0	0	0	0	0	0	0	0	0	0	0	0	0	0
hsa-miR-3680-5p	0	0	0	0	0	0	0	0	0	0	0	0	0	0	0	0	0	0	0	0	0	0	0	0	0	0	0	0	0	0	0	0	0	0	0	0	0	0	0	0	0	0	0	0	0	0	0	0	0
hsa-miR-3681-3p	0	0	0	0	0	0	0	0	0	0	0	0	0	0	0	0	0	0	0	0	0	0	0	0	0	0	0	0	0	0	0	0	0	0	0	0	0	0	0	0	0	0	0	0	0	0	0	0	0
hsa-miR-3681-5p	0	0	0	0	0	0	0	0	0	0	0	0	0	0	0	0	0	0	0	0	0	0	0	0	0	0	0	0	0	0	0	1	0	0	0	0	0	0	0	0	0	0	0	0	0	0	0	0	0
hsa-miR-3682-3p	0	1	0	0	0	0	1	1	0	0	1	1	1	0	0	0	5	0	0	3	2	0	0	0	0	0	0	3	0	0	0	0	0	1	1	0	0	0	0	2	0	0	1	0	0	0	3	0	0
hsa-miR-3682-5p	0	0	0	0	0	0	0	0	0	0	0	0	0	0	0	0	0	0	0	0	0	0	0	0	0	0	0	0	0	0	0	0	0	0	0	0	0	0	0	0	0	0	0	0	0	0	0	0	0
hsa-miR-3683	0	0	0	0	0	0	0	0	0	0	0	0	0	0	0	0	0	0	0	1	0	0	0	0	0	0	0	0	0	0	0	0	0	0	0	0	0	0	0	0	0	0	0	0	0	0	0	0	0
hsa-miR-3684	0	0	1	0	0	0	0	0	0	0	0	0	0	0	0	0	0	0	0	0	0	0	0	0	0	0	0	0	0	0	0	0	0	0	0	0	0	0	0	0	0	0	0	0	0	0	0	0	0
hsa-miR-3685	0	0	0	0	0	0	0	0	0	0	0	1	0	0	0	1	0	0	0	0	2	0	0	0	0	0	0	0	0	0	1	0	0	0	0	0	0	0	0	0	0	0	0	0	0	0	0	0	0
hsa-miR-3686	0	0	0	0	0	0	0	0	0	0	0	0	0	0	0	0	0	0	0	0	0	0	0	0	0	0	0	0	0	0	0	0	0	0	0	0	0	0	0	0	0	0	0	0	0	0	0	0	0
hsa-miR-3687	0	0	0	0	0	0	0	0	0	0	0	0	0	0	0	0	0	0	0	0	0	0	0	0	0	0	0	0	0	0	0	0	0	0	0	0	0	0	0	0	0	0	0	0	0	0	0	0	0
hsa-miR-3688-3p	3	4	0	0	1	0	3	0	8	0	1	0	0	0	0	0	0	0	1	4	1	0	0	0	0	0	0	0	3	0	2	1	0	5	2	0	1	2	0	1	0	6	0	0	0	1	5	0	0
hsa-miR-3688-5p	0	0	0	0	0	0	0	0	0	0	0	0	0	0	0	0	0	0	0	0	0	0	0	0	0	0	0	0	0	0	0	0	0	0	0	0	0	0	0	0	0	0	0	0	0	0	0	0	0
hsa-miR-3689a-3p	0	0	0	0	0	0	0	0	0	0	0	0	0	0	0	0	0	0	0	0	0	0	0	0	0	0	0	0	0	0	0	0	0	0	0	0	0	0	0	0	0	0	0	0	0	0	0	0	0
hsa-miR-3689a-5p	0	0	0	0	0	0	0	0	0	0	0	0	0	0	0	0	0	0	0	0	0	0	0	0	0	0	0	0	0	0	0	0	0	0	0	0	0	0	0	0	0	0	0	0	0	0	0	0	0
hsa-miR-3689b-3p	0	0	0	0	0	0	0	0	0	0	0	0	0	0	0	0	0	0	0	0	0	0	0	0	0	0	0	0	0	0	0	0	0	0	0	0	0	0	0	0	0	0	0	0	0	0	0	0	0
hsa-miR-3689b-5p	0	0	0	0	0	0	0	0	0	0	0	0	0	0	0	0	0	0	0	0	0	0	0	0	0	0	0	0	0	0	0	0	0	0	0	0	0	0	0	0	0	0	0	0	0	0	0	0	0
hsa-miR-3689c	0	0	0	0	0	0	0	0	0	0	0	0	0	0	0	0	0	0	0	0	0	0	0	0	0	0	0	0	0	0	0	0	0	0	0	0	0	0	0	0	0	0	0	0	0	0	0	0	0
hsa-miR-3689d	0	0	0	0	0	0	0	0	0	0	0	0	0	0	0	0	0	0	0	0	0	0	0	0	0	0	0	0	0	0	0	0	0	0	0	0	0	0	0	0	0	0	0	0	0	0	0	0	0
hsa-miR-3689e	0	0	0	0	0	0	0	0	0	0	0	0	0	0	0	0	0	0	0	0	0	0	0	0	0	0	0	0	0	0	0	0	0	0	0	0	0	0	0	0	0	0	0	0	0	0	0	0	0
hsa-miR-3689f	0	0	0	0	0	0	0	0	0	0	0	0	0	0	0	0	0	0	0	0	0	0	0	0	0	0	0	0	0	0	0	0	0	0	0	0	0	0	0	0	0	0	0	0	0	0	0	0	0
hsa-miR-3690	0	2	1	1	2	0	0	0	0	0	0	1	0	0	0	0	0	0	0	2	3	0	0	0	8	0	0	3	3	1	0	0	0	5	0	1	2	1	0	1	1	0	9	1	0	2	4	1	0
hsa-miR-3691-3p	0	0	0	0	0	0	0	0	0	0	0	0	0	0	0	0	0	0	0	0	0	0	0	0	0	0	0	0	0	0	0	0	0	0	0	0	0	0	0	0	0	0	0	0	0	0	0	0	0
hsa-miR-3691-5p	1	2	4	2	0	0	2	1	0	0	0	0	2	0	0	0	3	0	1	5	1	1	2	1	0	1	1	0	2	0	0	0	1	2	1	0	1	2	0	1	0	1	0	0	0	0	1	1	0
hsa-miR-3692-3p	0	0	0	0	0	0	0	0	0	0	0	0	0	0	0	0	0	0	0	0	0	0	0	0	0	0	0	0	0	0	0	0	0	0	0	0	0	0	0	0	0	0	0	0	0	0	0	0	0
hsa-miR-3692-5p	0	0	0	0	0	0	0	0	0	0	0	0	0	0	0	0	0	0	0	0	0	0	0	0	0	0	0	0	0	0	0	0	0	0	0	0	0	0	0	0	0	0	0	0	0	0	0	0	0
hsa-miR-3713	0	0	0	0	0	0	0	0	0	0	0	0	0	0	0	0	0	0	0	0	0	0	0	0	0	0	0	0	0	0	0	0	0	0	0	0	0	0	0	0	0	0	0	0	0	0	0	0	0
hsa-miR-3714	0	0	0	0	0	0	0	0	0	0	0	0	0	0	0	0	0	0	0	0	0	0	0	0	0	0	0	0	0	0	0	0	0	0	0	0	0	0	0	0	0	0	0	0	0	0	0	0	0
hsa-miR-3907	0	0	0	0	0	0	0	0	0	0	0	0	0	0	0	0	0	0	0	0	0	0	0	0	0	0	0	0	0	0	0	0	0	0	0	0	0	0	0	0	0	0	0	0	0	0	0	0	0
hsa-miR-3908	0	0	0	0	0	0	0	0	0	0	0	0	0	0	0	0	0	0	0	0	0	0	0	0	0	0	0	0	0	0	0	0	0	0	0	0	0	0	0	0	0	0	0	0	0	0	0	0	0
hsa-miR-3909	3	5	1	3	4	0	1	3	1	1	1	5	2	4	6	2	4	6	6	5	5	0	4	5	6	3	3	9	8	6	2	1	0	7	2	2	3	2	1	1	6	2	6	3	3	7	4	0	1
hsa-miR-3910	0	0	0	0	0	0	0	0	0	0	0	0	0	0	0	0	0	0	0	0	0	0	0	0	0	0	0	0	0	0	0	0	0	0	0	0	0	0	0	0	0	0	0	0	0	0	0	0	0
hsa-miR-3911	0	0	0	0	0	0	0	5	0	0	0	1	0	0	0	0	0	0	2	0	0	0	0	0	0	1	0	1	0	0	0	0	0	0	0	0	0	0	0	0	0	0	0	0	0	0	0	0	0
hsa-miR-3912-3p	2	1	0	1	0	0	1	0	4	0	1	0	1	2	0	1	0	0	2	3	0	0	0	1	1	0	0	0	2	1	0	1	2	2	1	0	1	1	0	2	1	1	0	0	0	0	4	0	0
hsa-miR-3912-5p	0	0	0	0	0	0	0	0	0	0	0	0	0	0	0	0	0	0	0	0	0	0	0	0	0	0	0	0	0	0	0	0	0	0	0	0	0	0	0	0	0	0	0	0	0	0	0	0	0
hsa-miR-3913-3p	0	0	0	0	0	0	0	0	0	0	0	0	0	0	0	0	0	0	0	0	0	0	0	0	0	0	0	0	0	0	0	0	0	0	0	0	0	0	0	0	0	0	0	0	0	0	0	0	0
hsa-miR-3913-5p	12	13	9	7	3	4	19	0	16	4	8	4	2	14	5	1	8	2	8	10	7	2	3	4	2	6	6	5	16	3	3	4	3	9	6	2	4	7	0	11	5	6	3	1	1	5	19	2	2
hsa-miR-3914	0	0	0	0	0	0	0	0	0	0	0	0	0	0	0	0	0	0	0	0	0	0	0	0	0	0	0	0	0	0	0	0	0	0	0	0	0	0	0	0	0	0	0	0	0	0	0	0	0
hsa-miR-3915	0	0	0	0	0	0	0	0	0	0	0	0	0	0	0	0	0	0	0	0	0	0	0	0	0	0	0	0	0	0	0	0	0	0	0	0	0	0	0	0	0	0	0	0	0	0	0	0	0
hsa-miR-3916	0	0	0	0	0	0	0	0	0	0	0	0	0	0	1	0	0	0	0	0	0	0	0	0	0	0	0	0	0	0	0	1	0	0	0	0	0	0	0	0	0	0	0	0	0	0	0	0	0
hsa-miR-3917	0	0	0	0	0	0	0	0	0	0	0	0	0	0	0	0	0	0	0	0	0	0	0	0	0	0	0	0	0	0	0	0	0	0	0	0	0	0	0	0	0	0	0	0	0	0	0	0	0
hsa-miR-3918	0	0	0	0	0	0	0	2	0	0	0	0	2	0	0	0	3	0	0	0	2	0	0	0	0	0	0	0	0	0	0	1	0	0	1	0	0	0	0	0	0	0	0	0	0	0	0	0	0
hsa-miR-3919	0	0	0	0	0	0	0	0	0	0	0	0	0	0	0	0	0	0	0	0	0	0	0	0	0	0	0	0	0	0	0	0	0	0	0	0	0	0	0	0	0	0	0	0	0	0	0	0	0
hsa-miR-3920	0	0	0	0	0	0	0	0	0	0	0	0	0	0	0	0	0	0	0	0	0	0	0	0	1	0	0	0	0	0	0	0	0	0	1	0	0	0	0	0	0	0	0	0	0	0	0	0	0
hsa-miR-3921	0	0	0	0	0	0	0	0	0	0	0	0	0	0	0	0	0	0	0	0	0	0	0	0	0	0	0	0	0	0	0	0	0	0	0	0	0	0	0	0	0	0	0	0	0	0	0	0	0
hsa-miR-3922-3p	0	0	0	0	0	0	0	0	0	0	0	0	0	0	0	0	0	0	0	0	0	0	0	0	0	0	0	0	0	0	0	0	0	0	0	0	0	0	0	0	0	0	0	0	0	0	0	0	0
hsa-miR-3922-5p	0	0	0	0	0	0	0	0	0	0	0	0	0	0	0	0	0	0	0	0	0	0	0	0	0	0	0	0	0	0	0	0	0	0	0	0	0	0	0	0	0	0	0	0	0	0	0	0	0
hsa-miR-3923	0	0	0	0	0	0	0	0	0	0	0	0	0	0	0	0	0	0	0	0	0	0	0	0	0	0	0	0	0	0	0	0	0	0	0	0	0	0	0	0	0	0	0	0	0	0	0	0	0
hsa-miR-3924	0	0	0	0	0	0	0	0	0	0	0	0	0	0	0	0	0	0	0	0	0	0	0	0	0	0	0	0	0	0	0	0	0	0	0	0	0	0	0	0	0	0	0	0	0	0	0	0	0
hsa-miR-3925-3p	0	0	0	0	0	0	0	0	0	0	0	0	0	0	0	0	0	0	0	0	0	0	0	0	0	0	0	0	0	0	0	0	0	0	0	0	0	0	0	0	0	0	0	0	0	0	0	0	0
hsa-miR-3925-5p	0	0	0	0	0	0	0	0	0	0	0	0	0	0	0	0	0	0	0	0	0	0	0	0	0	0	0	0	0	0	0	0	0	0	0	0	0	0	0	0	0	0	0	0	0	0	0	0	0
hsa-miR-3926	0	0	0	0	0	0	0	0	0	0	0	0	0	0	0	0	0	0	0	0	0	0	0	0	0	0	0	0	0	0	0	0	0	0	0	0	0	0	0	0	0	0	0	0	0	0	0	0	0
hsa-miR-3927-3p	0	0	0	0	0	0	0	0	0	0	0	0	0	0	0	0	0	0	0	0	0	0	0	0	0	0	0	0	0	0	0	0	0	0	0	0	0	0	0	0	0	0	0	0	0	0	0	0	0
hsa-miR-3927-5p	0	0	0	0	0	0	0	0	0	0	0	0	0	0	0	0	0	0	0	0	0	0	0	0	0	0	0	0	0	0	0	0	0	0	0	0	0	0	0	0	0	0	0	0	0	0	0	0	0
hsa-miR-3928-3p	1	5	3	1	3	6	2	0	2	6	3	2	4	0	4	1	0	3	9	2	7	2	0	1	1	2	1	0	0	5	2	4	1	0	2	1	0	0	1	0	0	1	2	0	1	0	1	1	2
hsa-miR-3928-5p	0	0	0	0	0	0	0	0	0	0	0	0	0	0	0	0	0	0	0	0	0	0	0	0	0	0	0	0	0	0	0	0	0	0	0	0	0	0	0	0	0	0	0	0	0	0	0	0	0
hsa-miR-3929	0	0	0	0	0	0	0	0	0	0	0	0	0	0	0	0	0	0	0	0	0	0	0	0	0	0	0	0	0	0	0	0	0	0	0	0	0	0	0	0	0	0	0	0	0	0	0	0	0
hsa-miR-3934-3p	0	0	0	0	0	0	0	0	0	0	0	0	0	0	0	0	0	0	0	0	0	0	0	0	0	0	0	0	0	0	0	0	0	0	0	0	0	0	0	0	0	0	0	0	0	0	0	0	0
hsa-miR-3934-5p	6	2	3	0	0	0	0	0	3	2	0	0	2	0	1	4	0	0	1	0	0	0	0	1	0	1	0	0	1	0	0	1	0	1	0	0	0	2	0	2	1	0	0	0	0	0	1	0	0
hsa-miR-3935	0	0	0	0	0	0	0	0	0	0	0	0	0	0	0	0	0	0	0	0	0	0	0	0	0	0	0	0	0	0	0	0	0	0	0	0	0	0	0	0	0	0	0	0	0	0	0	0	0
hsa-miR-3936	0	0	0	0	0	0	0	0	0	0	0	0	0	0	0	0	0	0	0	0	0	0	0	0	0	0	0	0	0	0	0	0	0	0	0	0	0	0	0	0	0	0	0	0	0	0	0	0	0
hsa-miR-3937	0	0	0	0	0	0	0	0	0	0	0	0	0	0	0	0	0	0	0	0	0	0	0	0	0	0	0	0	0	0	0	0	0	0	0	0	0	0	0	0	0	0	0	0	0	0	0	0	0
hsa-miR-3938	0	0	0	0	0	0	0	0	0	0	0	0	0	0	0	0	0	0	0	0	0	0	0	0	0	0	0	0	0	0	0	0	0	0	0	0	0	0	0	0	0	0	0	0	0	0	0	0	0
hsa-miR-3939	0	0	0	0	0	0	0	0	0	0	0	0	0	0	0	1	1	0	0	0	0	0	0	0	0	1	0	0	0	0	0	0	0	1	0	0	0	0	0	0	0	0	0	0	0	0	0	0	0
hsa-miR-3940-3p	0	0	0	0	0	1	0	0	0	0	0	0	0	0	0	0	0	0	0	0	0	0	0	0	0	0	0	1	0	0	0	0	0	1	0	0	0	0	0	0	0	0	0	0	0	0	0	0	0
hsa-miR-3940-5p	0	0	0	0	0	0	0	0	0	0	0	0	0	0	0	0	0	0	0	0	0	0	0	0	0	0	0	0	0	0	0	0	0	0	0	0	0	0	0	0	0	0	0	0	0	0	0	0	0
hsa-miR-3941	0	0	0	0	0	0	0	0	0	0	0	0	0	0	0	0	0	0	0	0	0	0	0	0	0	0	0	0	0	0	0	0	0	0	0	0	0	0	0	0	0	0	0	0	0	0	0	0	0
hsa-miR-3942-3p	0	0	0	0	0	0	0	0	0	0	0	0	0	0	0	0	0	0	0	0	0	0	0	0	0	0	0	0	0	0	0	0	0	0	0	0	0	0	0	0	0	0	0	0	0	0	0	0	0
hsa-miR-3942-5p	0	0	1	0	0	0	0	0	0	0	0	0	0	0	0	0	0	0	0	0	0	0	0	0	0	0	0	0	0	0	0	0	0	0	0	0	0	0	0	0	0	0	0	0	0	0	0	0	0
hsa-miR-3943	0	0	0	0	0	0	0	0	0	0	0	0	0	0	0	0	0	0	0	0	0	0	0	0	0	0	0	0	0	0	0	0	0	0	0	0	0	0	0	0	0	0	0	0	0	0	0	0	0
hsa-miR-3944-3p	0	0	0	0	0	0	0	0	0	0	0	0	0	0	0	0	1	0	0	0	0	0	1	0	0	0	0	0	0	0	0	0	0	0	0	0	0	0	0	0	0	0	0	0	0	0	0	0	0
hsa-miR-3944-5p	0	0	0	0	0	0	0	0	0	0	0	0	0	0	0	0	3	0	0	0	0	0	0	0	0	0	0	0	0	1	0	0	0	0	0	0	0	0	0	0	0	0	0	0	0	0	0	0	0
hsa-miR-3945	0	0	0	0	0	0	0	0	0	0	0	0	0	0	0	0	0	0	0	0	0	0	0	0	0	0	0	0	0	0	0	0	0	0	0	0	0	0	0	0	0	0	0	0	0	0	0	0	0
hsa-miR-3960	0	0	0	0	0	0	0	0	0	0	0	0	0	0	0	0	0	0	0	0	0	0	0	0	0	0	0	0	0	0	0	0	0	0	0	0	0	0	0	0	0	0	0	0	0	0	0	0	0
hsa-miR-3972	0	0	0	0	0	0	0	0	0	0	0	0	0	0	0	0	0	0	0	0	0	0	0	0	0	0	0	0	0	0	0	0	0	0	0	0	0	0	0	0	0	0	0	0	0	0	0	0	0
hsa-miR-3973	0	0	0	0	0	0	0	0	0	0	0	0	0	0	0	0	0	0	0	0	0	0	0	0	0	0	0	0	0	0	0	0	0	0	0	0	0	0	0	0	0	0	0	0	0	0	0	0	0
hsa-miR-3974	0	0	0	0	0	0	0	0	0	0	0	0	0	0	0	0	0	0	0	0	0	0	0	0	0	0	0	0	0	0	0	0	0	0	0	0	0	0	0	0	0	0	0	0	0	0	0	0	0
hsa-miR-3975	0	0	0	0	0	0	0	0	0	0	0	0	0	0	0	0	0	0	0	0	0	0	0	0	0	0	0	0	0	0	0	0	0	0	0	0	0	0	0	0	0	0	0	0	0	0	0	0	0
hsa-miR-3976	0	0	0	0	0	0	0	0	0	0	0	0	0	0	0	0	0	0	0	0	0	0	0	0	0	0	0	0	0	0	0	0	0	0	0	0	0	0	0	0	0	0	0	0	0	0	0	0	0
hsa-miR-3977	0	0	0	0	0	0	0	0	0	0	0	0	0	0	0	0	0	0	0	0	0	0	0	0	0	0	0	0	0	0	0	0	0	0	0	0	0	0	0	0	0	0	0	0	0	0	0	0	0
hsa-miR-3978	0	0	0	0	0	0	0	0	0	0	0	0	0	0	0	0	0	0	0	0	0	0	0	0	0	0	0	0	0	0	0	0	0	0	0	0	0	0	0	0	0	0	0	0	0	0	0	0	0
hsa-miR-4251	0	0	0	0	0	0	0	0	0	0	0	0	0	0	0	0	0	0	0	0	0	0	0	0	0	0	0	0	0	0	0	0	0	0	0	0	0	0	0	0	0	0	0	0	0	0	0	0	0
hsa-miR-4252	0	0	0	0	0	0	0	0	0	0	0	0	0	0	0	0	0	0	0	0	0	0	0	0	0	0	0	0	0	0	0	0	0	0	0	0	0	0	0	0	0	0	0	0	0	0	0	0	0
hsa-miR-4253	0	0	0	0	0	0	0	0	0	0	0	0	0	0	0	0	0	0	0	0	0	0	0	0	0	0	0	0	0	0	0	0	0	0	0	0	0	0	0	0	0	0	0	0	0	0	0	0	0
hsa-miR-4254	0	0	0	0	0	0	0	0	0	0	0	0	0	0	0	0	0	0	0	0	0	0	0	0	0	0	0	0	0	0	0	0	0	0	0	0	0	0	0	0	0	0	0	0	0	0	0	0	0
hsa-miR-4255	0	0	0	0	0	0	0	0	0	0	0	0	0	0	0	0	0	0	0	0	0	0	0	0	0	0	0	0	0	0	0	0	0	0	0	0	0	0	0	0	0	0	0	0	0	0	0	0	0
hsa-miR-4256	0	0	0	0	0	0	0	0	0	0	0	0	0	0	0	0	0	0	0	0	0	0	0	0	0	0	0	0	0	0	0	0	0	0	0	0	0	0	0	0	0	0	0	0	0	0	0	0	0
hsa-miR-4257	0	0	0	0	0	0	0	0	0	0	0	0	0	0	0	0	0	0	0	0	0	0	0	0	0	0	0	0	0	0	0	0	0	0	0	0	0	0	0	0	0	0	0	0	0	0	0	0	0
hsa-miR-4258	0	0	0	0	0	0	0	0	0	0	0	0	0	0	0	0	0	0	0	0	0	0	0	0	0	0	0	0	0	0	0	0	0	0	0	0	0	0	0	0	0	0	0	0	0	0	0	0	0
hsa-miR-4259	0	0	0	0	0	0	0	0	0	0	0	0	0	0	0	0	0	0	0	0	0	0	0	0	0	0	0	0	0	0	0	0	0	0	0	0	0	0	0	0	0	0	0	0	0	0	0	0	0
hsa-miR-4260	0	0	0	0	0	0	0	0	0	0	0	0	0	0	0	0	0	0	0	0	0	0	0	0	0	0	0	0	0	0	0	0	0	0	0	0	0	0	0	0	0	0	0	0	0	0	0	0	0
hsa-miR-4261	0	0	0	0	0	0	0	0	0	0	0	0	0	0	0	0	0	0	0	0	0	0	0	0	0	0	0	0	0	0	0	0	0	0	0	0	0	0	0	0	0	0	0	0	0	0	0	0	0
hsa-miR-4262	0	0	0	0	0	0	0	0	0	0	0	0	0	0	0	0	0	0	0	0	0	0	0	0	0	0	0	0	0	0	0	0	0	0	0	0	0	0	0	0	0	0	0	0	0	0	0	0	0
hsa-miR-4263	0	0	0	0	0	0	0	0	0	0	0	0	0	0	0	0	0	0	0	0	0	0	0	0	0	0	0	0	0	0	0	0	0	0	0	0	0	0	0	0	0	0	0	0	0	0	0	0	0
hsa-miR-4264	0	0	0	0	0	0	0	0	0	0	0	0	0	0	0	0	0	0	0	0	0	0	0	0	0	0	0	0	0	0	0	0	0	0	0	0	0	0	0	0	0	0	0	0	0	0	0	0	0
hsa-miR-4265	0	0	0	0	0	0	0	0	0	0	0	0	0	0	0	0	0	0	0	0	0	0	0	0	0	0	0	0	0	0	0	0	0	0	0	0	0	0	0	0	0	0	0	0	0	0	0	0	0
hsa-miR-4266	0	0	0	0	0	0	0	0	0	0	0	0	0	0	0	0	0	0	0	0	0	0	0	0	0	0	0	0	0	0	0	0	0	0	0	0	0	0	0	0	0	0	0	0	0	0	0	0	0
hsa-miR-4267	0	0	0	0	0	0	0	0	0	0	0	0	0	0	0	0	0	0	0	0	0	0	0	0	0	0	0	0	0	0	0	0	0	0	0	0	0	0	0	0	0	0	0	0	0	0	0	0	0
hsa-miR-4268	0	0	0	0	0	0	0	0	0	0	0	0	0	0	0	0	0	0	0	0	0	0	0	0	0	0	0	0	0	0	0	0	0	0	0	0	0	0	0	0	0	0	0	0	0	0	0	0	0
hsa-miR-4269	0	0	0	0	0	0	0	0	0	0	0	0	0	0	0	0	0	0	0	0	0	0	0	0	0	0	0	0	0	0	0	0	0	0	0	0	0	0	0	0	0	0	0	0	0	0	0	0	0
hsa-miR-4270	0	0	0	0	0	0	0	0	0	0	0	0	0	0	0	0	0	0	0	0	0	0	0	0	0	0	0	0	0	0	0	0	0	0	0	0	0	0	0	0	0	0	0	0	0	0	0	0	0
hsa-miR-4271	0	0	0	0	0	0	0	0	0	0	0	0	0	0	0	0	0	0	0	0	0	0	0	0	0	0	0	0	0	0	0	0	0	0	0	0	0	0	0	0	0	0	0	0	0	0	0	0	0
hsa-miR-4272	0	0	0	0	0	0	0	0	0	0	0	0	0	0	0	0	0	0	0	0	0	0	0	0	0	0	0	0	0	0	0	0	0	0	0	0	0	0	0	0	0	0	0	0	0	0	0	0	0
hsa-miR-4273	0	0	0	0	0	0	0	0	0	0	0	0	0	0	0	0	0	0	0	0	0	0	0	0	0	0	0	0	0	0	0	0	0	0	0	0	0	0	0	0	0	0	0	0	0	0	0	0	0
hsa-miR-4274	0	0	0	0	0	0	0	0	0	0	0	0	0	0	0	0	0	0	0	0	0	0	0	0	0	0	0	0	0	0	0	0	0	0	0	0	0	0	0	0	0	0	0	0	0	0	0	0	0
hsa-miR-4275	0	0	0	0	0	0	0	0	0	0	0	0	0	0	0	0	0	0	0	0	0	0	0	0	0	0	0	0	0	0	0	0	0	0	0	0	0	0	0	0	0	0	0	0	0	0	0	0	0
hsa-miR-4276	0	0	0	0	0	0	0	0	0	0	0	0	0	0	0	0	0	0	0	0	0	0	0	0	0	0	0	0	0	0	0	0	0	0	0	0	0	0	0	0	0	0	0	0	0	0	0	0	0
hsa-miR-4277	0	0	0	0	0	0	0	0	0	0	0	0	0	0	0	0	0	0	0	0	0	0	0	0	0	0	0	0	0	0	0	0	0	0	0	0	0	0	0	0	0	0	0	0	0	0	0	0	0
hsa-miR-4278	0	0	0	0	0	0	0	0	0	0	0	0	0	0	0	0	0	0	0	0	0	0	0	0	0	0	0	0	0	0	0	0	0	0	0	0	0	0	0	0	0	0	0	0	0	0	0	0	0
hsa-miR-4279	0	0	0	0	0	0	0	0	0	0	0	0	0	0	0	0	0	0	0	0	0	0	0	0	0	0	0	0	0	0	0	0	0	0	0	0	0	0	0	0	0	0	0	0	0	0	0	0	0
hsa-miR-4280	0	0	0	0	0	0	0	0	0	0	0	0	0	0	0	0	0	0	0	0	0	0	0	0	0	0	0	0	0	0	0	0	0	0	0	0	0	0	0	0	0	0	0	0	0	0	0	0	0
hsa-miR-4281	0	0	0	0	0	0	0	0	0	0	0	0	0	0	0	0	0	0	0	0	0	0	0	0	0	0	0	0	0	0	0	0	0	0	0	0	0	0	0	0	0	0	0	0	0	0	0	0	0
hsa-miR-4282	0	0	0	0	0	0	0	0	0	0	0	0	0	0	0	0	0	0	0	0	0	0	0	0	0	0	0	0	0	0	0	0	0	0	0	0	0	0	0	0	0	0	0	0	0	0	0	0	0
hsa-miR-4283	0	0	0	0	0	0	0	0	0	0	0	0	0	0	0	0	0	0	0	0	0	0	0	0	0	0	0	0	0	0	0	0	0	0	0	0	0	0	0	0	0	0	0	0	0	0	0	0	0
hsa-miR-4284	0	0	0	0	0	0	0	0	0	0	0	0	0	0	0	0	0	0	0	0	0	0	0	0	0	0	0	0	0	0	0	0	0	0	0	0	0	0	0	0	0	0	0	0	0	0	0	0	0
hsa-miR-4285	0	0	0	0	0	0	0	0	0	0	0	0	0	0	0	0	0	0	0	0	0	0	0	0	0	0	0	0	0	0	0	0	0	0	0	0	0	0	0	0	0	0	0	0	0	0	0	0	0
hsa-miR-4286	0	0	0	0	0	0	0	0	0	0	0	0	0	0	0	0	0	0	0	0	0	0	0	0	0	0	0	0	0	0	0	0	0	0	0	0	0	0	0	0	0	0	0	0	0	0	0	0	0
hsa-miR-4287	0	0	0	0	0	0	0	0	0	0	0	0	0	0	0	0	0	0	0	0	0	0	0	0	0	0	0	0	0	0	0	0	0	0	0	0	0	0	0	0	0	0	0	0	0	0	0	0	0
hsa-miR-4288	0	0	0	0	0	0	0	0	0	0	0	0	0	0	0	0	0	0	0	0	0	0	0	0	0	0	0	0	0	0	0	0	0	0	0	0	0	0	0	0	0	0	0	0	0	0	0	0	0
hsa-miR-4289	0	0	0	0	0	0	0	0	0	0	0	0	0	0	0	0	0	0	0	0	0	0	0	0	0	0	0	0	0	0	0	0	0	0	0	0	0	0	0	0	0	0	0	0	0	0	0	0	0
hsa-miR-4290	0	0	0	0	0	0	0	0	0	0	0	0	0	0	0	0	0	0	0	0	0	0	0	0	0	0	0	0	0	0	0	0	0	0	0	0	0	0	0	0	0	0	0	0	0	0	0	0	0
hsa-miR-4291	0	0	0	0	0	0	0	0	0	0	0	0	0	0	0	0	0	0	0	0	0	0	0	0	0	0	0	0	0	0	0	0	0	0	0	0	0	0	0	0	0	0	0	0	0	0	0	0	0
hsa-miR-4292	0	0	0	0	0	0	0	0	0	0	0	0	0	0	0	0	0	0	0	0	0	0	0	0	0	0	0	0	0	0	0	0	0	0	0	0	0	0	0	0	0	0	0	0	0	0	0	0	0
hsa-miR-4293	0	0	0	0	0	0	0	0	0	0	0	0	0	0	0	0	0	0	0	0	0	0	0	0	0	0	0	0	0	0	0	0	0	0	0	0	0	0	0	0	0	0	0	0	0	0	0	0	0
hsa-miR-4294	0	0	0	0	0	0	0	0	0	0	0	0	0	0	0	0	0	0	0	0	0	0	0	0	0	0	0	0	0	0	0	0	0	0	0	0	0	0	0	0	0	0	0	0	0	0	0	0	0
hsa-miR-4295	0	0	0	0	0	0	0	0	0	0	0	0	0	0	0	0	0	0	0	0	0	0	0	0	0	0	0	0	0	0	0	0	0	0	0	0	0	0	0	0	0	0	0	0	0	0	0	0	0
hsa-miR-4296	0	0	0	0	0	0	0	0	0	0	0	0	0	0	0	0	0	0	0	0	0	0	0	0	0	0	0	0	0	0	0	0	0	0	0	0	0	0	0	0	0	0	0	0	0	0	0	0	0
hsa-miR-4297	0	0	0	0	0	0	0	0	0	0	0	0	0	0	0	0	0	0	0	0	0	0	0	0	0	0	0	0	0	0	0	0	0	0	0	0	0	0	0	0	0	0	0	0	0	0	0	0	0
hsa-miR-4298	0	0	0	0	0	0	0	0	0	0	0	0	0	0	0	0	0	0	0	0	0	0	0	0	0	0	0	0	0	0	0	0	0	0	0	0	0	0	0	0	0	0	0	0	0	0	0	0	0
hsa-miR-4299	0	0	0	0	0	0	0	0	0	0	0	0	0	0	0	0	0	0	0	0	0	0	0	0	0	0	0	0	0	0	0	0	0	0	0	0	0	0	0	0	0	0	0	0	0	0	0	0	0
hsa-miR-4300	0	0	0	0	0	0	0	0	0	0	0	0	0	0	0	0	0	0	0	0	0	0	0	0	0	0	0	0	0	0	0	0	0	0	0	0	0	0	0	0	0	0	0	0	0	0	0	0	0
hsa-miR-4301	0	0	0	0	0	0	0	0	0	0	0	0	0	0	0	0	0	0	0	0	0	0	0	0	0	0	0	0	0	0	0	0	0	0	0	0	0	0	0	0	0	0	0	0	0	0	0	0	0
hsa-miR-4302	0	0	0	0	0	0	0	0	0	0	0	0	0	0	0	0	0	0	0	0	0	0	0	0	0	0	0	0	0	0	0	0	0	0	0	0	0	0	0	0	0	0	0	0	0	0	0	0	0
hsa-miR-4303	0	0	0	0	0	0	0	0	0	0	0	0	0	0	0	0	0	0	0	0	0	0	0	0	0	0	0	0	0	0	0	0	0	0	0	0	0	0	0	0	0	0	0	0	0	0	0	0	0
hsa-miR-4304	0	0	0	0	0	0	0	0	0	0	0	0	0	0	0	0	0	0	0	0	0	0	0	0	0	0	0	0	0	0	0	0	0	0	0	0	0	0	0	0	0	0	0	0	0	0	0	0	0
hsa-miR-4305	0	0	0	0	0	0	0	0	0	0	0	0	0	0	0	0	0	0	0	0	0	0	0	0	0	0	0	0	0	0	0	0	0	0	0	0	0	0	0	0	0	0	0	0	0	0	0	0	0
hsa-miR-4306	1	2	2	3	1	0	1	2	1	0	2	0	3	10	1	3	3	0	2	13	1	1	1	2	1	0	3	2	6	1	0	0	1	3	2	0	3	2	0	2	3	2	0	0	0	0	8	0	0
hsa-miR-4307	0	0	0	0	0	0	0	0	0	0	0	0	0	0	0	0	0	0	0	0	0	0	0	0	0	0	0	0	0	0	0	0	0	0	0	0	0	0	0	0	0	0	0	0	0	0	0	0	0
hsa-miR-4308	0	0	0	0	0	0	0	0	0	0	0	0	0	0	0	0	0	0	0	0	0	0	0	0	0	0	0	0	0	0	0	0	0	0	0	0	0	0	0	0	0	0	0	0	0	0	0	0	0
hsa-miR-4309	0	0	0	0	0	0	0	0	0	0	0	0	0	0	0	0	0	0	0	0	0	0	0	0	0	0	0	0	0	0	0	0	0	0	0	0	0	0	0	0	0	0	0	0	0	0	0	0	0
hsa-miR-4310	0	0	0	0	0	0	0	0	0	0	0	0	0	0	0	0	0	0	0	0	0	0	0	0	0	0	0	0	0	0	0	0	0	0	0	0	0	0	0	0	0	0	0	0	0	0	0	0	0
hsa-miR-4311	0	0	0	0	0	0	0	0	0	0	0	0	0	0	0	0	0	0	0	0	0	0	0	0	0	0	0	0	0	0	0	0	0	0	0	0	0	0	0	0	0	0	0	0	0	0	0	0	0
hsa-miR-4312	0	0	0	0	0	0	0	0	0	0	0	0	0	0	0	0	0	0	0	0	0	0	0	0	0	0	0	0	0	0	0	0	0	0	0	0	0	0	0	0	0	0	0	0	0	0	0	0	0
hsa-miR-4313	0	0	0	0	0	0	0	0	0	0	0	0	0	0	0	0	0	0	0	0	0	0	0	0	0	0	0	0	0	0	0	0	0	0	0	0	0	0	0	0	0	0	0	0	0	0	0	0	0
hsa-miR-4314	0	0	0	0	0	0	0	0	0	0	0	0	0	0	0	0	0	0	0	0	0	0	0	0	0	0	0	0	0	0	0	0	0	0	0	0	0	0	0	0	0	0	0	0	0	0	0	0	0
hsa-miR-4315	0	0	0	0	0	0	0	0	0	0	0	0	0	0	0	0	0	0	0	0	0	0	0	0	0	0	0	0	0	0	0	0	0	0	0	0	0	0	0	0	0	0	0	0	0	0	0	0	0
hsa-miR-4316	0	0	0	0	0	0	0	0	0	0	0	0	0	0	0	0	0	0	0	0	0	0	0	0	0	0	0	0	0	0	0	0	0	0	0	0	0	0	0	0	0	0	0	0	0	0	0	0	0
hsa-miR-4317	0	0	0	0	0	0	0	0	0	0	0	0	0	0	0	0	0	0	0	0	0	0	0	0	0	0	0	0	0	0	0	0	0	0	0	0	0	0	0	0	0	0	0	0	0	0	0	0	0
hsa-miR-4318	0	0	0	0	0	0	0	0	0	0	0	0	0	0	0	0	0	0	0	0	0	0	0	0	0	0	0	0	0	0	0	0	0	0	0	0	0	0	0	0	0	0	0	0	0	0	0	0	0
hsa-miR-4319	0	0	0	0	0	0	0	0	0	0	0	0	0	0	0	0	0	0	0	0	0	0	0	0	0	0	0	0	0	0	0	0	0	0	0	0	0	0	0	0	0	0	0	0	0	0	0	0	0
hsa-miR-4320	0	0	0	0	0	0	0	0	0	0	0	0	0	0	0	0	0	0	0	0	0	0	0	0	0	0	0	0	0	0	0	0	0	0	0	0	0	0	0	0	0	0	0	0	0	0	0	0	0
hsa-miR-4321	0	0	0	0	0	0	0	0	0	0	0	0	0	0	0	0	0	0	0	0	0	0	0	0	0	0	0	0	0	0	0	0	0	0	0	0	0	0	0	0	0	0	0	0	0	0	0	0	0
hsa-miR-4322	0	0	0	0	0	0	0	0	0	0	0	0	0	0	0	0	0	0	0	0	0	0	0	0	0	0	0	0	0	0	0	0	0	0	0	0	0	0	0	0	0	0	0	0	0	0	0	0	0
hsa-miR-4323	0	0	0	0	0	0	0	0	0	0	0	0	0	0	0	0	0	0	0	0	0	0	0	0	0	0	0	0	0	0	0	0	0	0	0	0	0	0	0	0	0	0	0	0	0	0	0	0	0
hsa-miR-4324	0	0	0	0	0	0	0	0	0	0	0	0	0	0	0	0	0	0	0	0	0	0	0	0	0	0	0	0	0	0	0	0	0	0	0	0	0	0	0	0	0	0	0	0	0	0	0	0	0
hsa-miR-4325	0	0	0	0	0	0	0	0	0	0	0	0	0	0	0	0	0	0	0	0	0	0	0	0	0	0	0	0	0	0	0	0	0	0	0	0	0	0	0	0	0	0	0	0	0	0	0	0	0
hsa-miR-4326	0	1	1	0	0	1	0	0	0	0	0	0	0	0	1	0	0	2	0	0	0	0	0	0	0	0	0	1	0	0	0	0	0	3	0	0	0	3	0	0	0	0	0	1	0	1	1	1	0
hsa-miR-4327	0	0	0	0	0	0	0	0	0	0	0	0	0	0	0	0	0	0	0	0	0	0	0	0	0	0	0	0	0	0	0	0	0	0	0	0	0	0	0	0	0	0	0	0	0	0	0	0	0
hsa-miR-4328	0	0	0	0	0	0	0	0	0	0	0	0	0	0	0	0	0	0	0	0	0	0	0	0	0	0	0	0	0	0	0	0	0	0	0	0	0	0	0	0	0	0	0	0	0	0	0	0	0
hsa-miR-4329	0	0	0	0	0	0	0	0	0	0	0	0	0	0	0	0	0	0	0	0	0	0	0	0	0	0	0	0	0	0	0	0	0	0	0	0	0	0	0	0	0	0	0	0	0	0	0	0	0
hsa-miR-4330	0	0	0	0	0	0	0	0	0	0	0	0	0	0	0	0	0	0	0	0	0	0	0	0	0	0	0	0	0	0	0	0	0	0	0	0	0	0	0	0	0	0	0	0	0	0	0	0	0
hsa-miR-4417	0	0	0	0	0	0	0	0	0	0	0	0	0	0	0	0	0	0	0	0	0	0	0	0	0	0	0	0	0	0	0	0	0	0	0	0	0	0	0	0	0	0	0	0	0	0	0	0	0
hsa-miR-4418	0	0	0	0	0	0	0	0	0	0	0	0	0	0	0	0	0	0	0	0	0	0	0	0	0	0	0	0	0	0	0	0	0	0	0	0	0	0	0	0	0	0	0	0	0	0	0	0	0
hsa-miR-4419a	0	0	0	0	0	0	0	0	0	0	0	0	0	0	0	0	0	0	0	0	0	0	0	0	0	0	0	0	0	0	0	0	0	0	0	0	0	0	0	0	0	0	0	0	0	0	0	0	0
hsa-miR-4419b	0	0	0	0	0	0	0	0	0	0	0	0	0	0	0	0	0	0	0	0	0	0	0	0	0	0	0	0	0	0	0	0	0	0	0	0	0	0	0	0	0	0	0	0	0	0	0	0	0
hsa-miR-4420	0	0	0	0	0	0	0	0	0	0	0	0	0	0	0	0	0	0	0	0	0	0	0	0	0	0	0	0	0	0	0	0	0	0	0	0	0	0	0	0	0	0	0	0	0	0	0	0	0
hsa-miR-4421	0	0	0	0	0	0	0	0	0	0	0	0	0	0	0	0	0	0	0	0	0	0	0	0	0	0	0	0	0	0	0	0	0	0	0	0	0	0	0	0	0	0	0	0	0	0	0	0	0
hsa-miR-4422	0	0	0	0	0	0	0	0	0	0	0	0	0	0	0	0	0	0	0	0	0	0	0	0	0	0	0	0	0	0	0	0	0	0	0	0	0	0	0	0	0	0	0	0	0	0	0	0	0
hsa-miR-4423-3p	0	0	0	0	0	0	0	0	0	0	0	0	0	0	0	0	0	0	0	0	0	0	0	0	0	0	0	0	0	0	0	0	0	0	0	0	0	0	0	0	0	0	0	0	0	0	0	0	0
hsa-miR-4423-5p	0	0	0	0	0	0	0	0	0	0	0	0	0	0	0	0	0	0	0	0	0	0	0	0	0	0	0	0	0	0	0	0	0	0	0	0	0	0	0	0	0	0	0	0	0	0	0	0	0
hsa-miR-4424	0	0	0	0	0	0	0	0	0	0	0	0	0	0	0	0	0	0	0	0	0	0	0	0	0	0	0	0	0	0	0	0	0	0	0	0	0	0	0	0	0	0	0	0	0	0	0	0	0
hsa-miR-4425	0	0	0	0	0	0	0	0	0	0	0	0	0	0	0	0	0	0	0	0	0	0	0	0	0	0	0	0	0	0	0	0	0	0	0	0	0	0	0	0	0	0	0	0	0	0	0	0	0
hsa-miR-4426	0	0	0	0	0	0	0	0	0	0	0	0	0	0	0	0	0	0	0	0	0	0	0	0	0	0	0	0	0	0	0	0	0	0	0	0	0	0	0	0	0	0	0	0	0	0	0	0	0
hsa-miR-4427	0	0	0	0	0	0	0	0	0	0	0	0	0	0	0	0	0	0	0	0	0	0	0	0	0	0	0	0	0	0	0	0	0	0	0	0	0	0	0	0	0	0	0	0	0	0	0	0	0
hsa-miR-4428	0	0	0	0	0	0	0	0	0	0	0	0	0	0	0	0	0	0	0	0	0	0	0	0	0	0	0	0	0	0	0	0	0	0	0	0	0	0	0	0	0	0	0	0	0	0	0	0	0
hsa-miR-4429	4	4	13	5	2	3	7	14	1	4	4	2	5	6	2	6	15	2	8	13	12	4	3	5	3	8	1	2	5	5	4	4	5	3	13	3	1	2	1	6	4	2	2	2	1	2	8	4	3
hsa-miR-4430	0	0	0	0	0	0	0	0	0	0	0	0	0	0	0	0	0	0	0	0	0	0	0	0	0	0	0	0	0	0	0	0	0	0	0	0	0	0	0	0	0	0	0	0	0	0	0	0	0
hsa-miR-4431	0	0	0	0	0	0	0	0	0	0	0	0	0	0	0	0	0	0	0	0	0	0	0	0	0	0	0	0	0	0	0	0	0	0	0	0	0	0	0	0	0	0	0	0	0	0	0	0	0
hsa-miR-4432	0	0	0	0	0	0	0	0	0	0	0	0	0	0	0	0	0	0	0	0	0	0	0	0	0	0	0	0	0	0	0	0	0	0	0	0	0	0	0	0	0	0	0	0	0	0	0	0	0
hsa-miR-4433-3p	0	0	0	0	0	0	0	0	0	0	0	0	0	1	0	0	1	0	0	1	0	0	0	0	0	0	0	0	0	0	0	0	0	0	0	0	1	0	0	0	0	0	0	0	0	0	0	0	0
hsa-miR-4433-5p	0	0	0	0	0	0	0	0	0	0	0	0	0	0	0	0	0	0	0	0	0	0	0	0	0	0	0	0	0	0	0	0	0	0	0	0	0	0	0	0	0	0	0	0	0	0	0	0	0
hsa-miR-4433b-3p	37	2	7	16	118	142	43	38	0	67	87	60	19	98	11	90	105	17	2	61	0	53	300	152	112	126	59	34	63	77	37	26	63	27	8	41	180	22	60	204	132	3	74	208	65	158	4	44	145
hsa-miR-4433b-5p	10	3	1	1	11	14	12	1	2	10	9	11	6	3	5	9	4	16	3	5	1	18	10	3	14	3	9	6	5	1	8	7	0	5	8	6	4	2	10	6	10	1	15	9	12	9	0	2	33
hsa-miR-4434	0	0	0	0	0	0	0	0	0	0	0	0	0	0	0	0	0	0	0	0	0	0	0	0	0	0	0	0	0	0	0	0	0	0	0	0	0	0	0	0	0	0	0	0	0	0	0	0	0
hsa-miR-4435	0	0	0	1	0	4	0	2	1	4	1	1	1	0	0	2	1	0	0	4	0	1	1	0	1	0	1	0	2	0	0	0	0	1	0	1	1	1	2	0	1	0	0	0	2	0	0	0	1
hsa-miR-4436a	0	0	0	0	0	0	0	0	0	0	0	0	0	0	0	0	0	0	0	0	0	0	0	0	0	0	0	0	0	0	0	0	0	0	0	0	0	0	0	0	0	0	0	0	0	0	0	0	0
hsa-miR-4436b-3p	0	0	0	0	0	0	0	0	0	0	0	0	0	0	0	0	0	0	0	0	0	0	0	0	0	0	0	0	0	0	0	0	0	0	0	0	0	0	0	0	0	0	0	0	0	0	0	0	0
hsa-miR-4436b-5p	0	0	0	0	0	0	0	0	0	0	0	0	0	0	0	0	0	0	0	0	0	0	0	0	0	0	0	0	0	0	0	0	0	0	0	0	0	0	0	0	0	0	0	0	0	0	0	0	0
hsa-miR-4437	0	0	0	0	0	0	0	0	0	0	0	0	0	0	0	1	0	0	1	2	1	0	0	0	0	0	0	0	0	2	0	0	0	0	0	0	0	0	0	0	0	0	0	0	0	0	0	0	0
hsa-miR-4438	0	0	0	0	0	0	0	0	0	0	0	0	0	0	0	0	0	0	0	0	0	0	0	0	0	0	0	0	0	0	0	0	0	0	0	0	0	0	0	0	0	0	0	0	0	0	0	0	0
hsa-miR-4439	0	0	0	0	0	0	0	0	0	0	0	0	0	0	0	0	0	0	0	0	0	0	0	0	0	0	0	0	0	0	0	0	0	0	0	0	0	0	0	0	0	0	0	0	0	0	0	0	0
hsa-miR-4440	0	0	0	0	0	0	0	1	0	0	0	0	0	0	1	0	1	0	0	0	0	0	0	1	0	0	0	0	0	0	0	0	0	0	0	0	0	0	0	0	0	0	0	0	0	1	0	0	0
hsa-miR-4441	0	0	0	0	0	0	0	0	0	0	0	0	0	0	0	0	0	0	0	0	0	0	0	0	0	0	0	0	0	0	0	0	0	0	0	0	0	0	0	0	0	0	0	0	0	0	0	0	0
hsa-miR-4442	0	0	0	0	0	0	0	0	0	0	0	0	0	0	0	0	0	0	0	0	0	0	0	0	0	0	0	0	0	0	0	0	0	0	0	0	0	0	0	0	0	0	0	0	0	0	0	0	0
hsa-miR-4443	9	14	23	41	13	6	10	44	6	5	6	11	13	150	32	29	179	7	32	57	88	10	18	53	27	21	7	14	16	40	2	16	36	17	9	17	24	7	11	14	21	4	32	8	7	17	5	26	8
hsa-miR-4444	0	0	0	0	0	0	0	0	0	0	0	0	0	0	0	0	0	0	0	0	0	0	0	0	0	0	0	0	0	0	0	0	0	0	0	0	0	0	0	0	0	0	0	0	0	0	0	0	0
hsa-miR-4445-3p	0	0	0	0	0	0	0	0	0	0	0	0	0	0	0	0	0	0	0	0	0	0	0	0	0	0	0	0	0	0	0	0	0	0	0	0	0	0	0	0	0	0	0	0	0	0	0	0	0
hsa-miR-4445-5p	0	0	0	0	0	0	0	0	0	0	0	0	0	0	0	0	0	0	0	0	0	0	0	0	0	0	0	0	0	0	0	0	0	0	0	0	0	0	0	0	0	0	0	0	0	0	0	0	0
hsa-miR-4446-3p	12	6	7	3	21	24	24	47	0	11	12	17	4	9	11	13	8	4	0	14	4	18	37	15	30	11	13	10	11	10	1	3	3	12	6	24	19	8	8	39	21	3	27	15	31	26	2	2	22
hsa-miR-4446-5p	0	0	0	0	0	0	0	0	0	0	0	0	0	0	0	0	0	0	0	0	0	0	0	0	0	0	0	0	0	0	0	0	0	0	0	0	0	0	0	0	0	0	0	0	0	0	0	0	0
hsa-miR-4447	0	0	0	0	0	0	0	0	0	0	0	0	0	0	0	0	0	0	0	0	0	0	0	0	0	0	0	0	0	0	0	0	0	0	0	0	0	0	0	0	0	0	0	0	0	0	0	0	0
hsa-miR-4448	0	0	0	0	0	0	0	0	0	0	0	0	0	0	0	0	0	0	0	0	0	0	0	0	0	0	0	0	0	0	0	0	0	0	0	0	0	0	0	0	0	0	0	0	0	0	0	0	0
hsa-miR-4449	0	0	0	0	0	0	0	0	0	0	0	0	0	0	0	0	0	0	0	1	0	0	0	0	0	0	0	0	0	0	0	0	0	0	0	0	0	0	0	0	0	0	0	0	0	0	0	0	0
hsa-miR-4450	0	0	0	0	0	0	0	0	0	0	0	0	0	0	0	0	0	0	0	0	0	0	0	0	0	0	0	0	0	0	0	0	0	0	0	0	0	0	0	0	0	0	0	0	0	0	0	0	0
hsa-miR-4451	0	0	0	0	0	0	0	0	0	0	0	0	0	0	0	0	0	0	0	0	0	0	0	0	0	0	0	0	0	0	0	0	0	0	0	0	0	0	0	0	0	0	0	0	0	0	0	0	0
hsa-miR-4452	0	0	0	0	0	0	0	0	0	0	0	0	0	0	0	0	0	0	0	0	0	0	0	0	0	0	0	0	0	0	0	0	0	0	0	0	0	0	0	0	0	0	0	0	0	0	0	0	0
hsa-miR-4453	0	0	0	0	0	0	0	0	0	0	0	0	0	0	0	0	0	0	0	0	0	0	0	0	0	0	0	0	0	0	0	0	0	0	0	0	0	0	0	0	0	0	0	0	0	0	0	0	0
hsa-miR-4454	0	0	0	0	0	0	0	0	0	0	0	0	0	0	0	0	0	0	0	0	0	0	0	0	0	0	0	0	0	0	0	0	0	0	0	0	0	0	0	0	0	0	0	0	0	0	0	0	0
hsa-miR-4455	0	0	0	0	0	0	0	0	0	0	0	0	0	0	0	0	0	0	0	0	0	0	0	0	0	0	0	0	0	0	0	0	0	0	0	0	0	0	0	0	0	0	0	0	0	0	0	0	0
hsa-miR-4456	0	0	0	0	0	0	0	0	0	0	0	0	0	0	0	0	0	0	0	0	0	0	0	0	0	0	0	0	0	0	0	0	0	0	0	0	0	0	0	0	0	0	0	0	0	0	0	0	0
hsa-miR-4457	0	0	0	0	0	0	0	0	0	0	0	0	0	0	0	0	0	0	0	0	0	0	0	0	0	0	0	0	0	0	0	0	0	0	0	0	0	0	0	0	0	0	0	0	0	0	0	0	0
hsa-miR-4458	0	0	0	0	0	0	0	0	0	0	0	0	0	0	0	0	0	0	0	0	0	0	0	0	0	0	0	0	0	0	0	0	0	0	0	0	0	0	0	0	0	0	0	0	0	0	0	0	0
hsa-miR-4459	0	0	0	0	0	0	0	0	0	0	0	0	0	0	0	0	0	0	0	0	0	0	0	0	0	0	0	0	0	0	0	0	0	0	0	0	0	0	0	0	0	0	0	0	0	0	0	0	0
hsa-miR-4460	0	0	0	0	0	0	0	0	0	0	0	0	0	0	0	0	0	0	0	0	0	0	0	0	0	0	0	0	0	0	0	0	0	0	0	0	0	0	0	0	0	0	0	0	0	0	0	0	0
hsa-miR-4461	0	0	0	0	0	0	0	0	0	0	0	0	0	0	0	0	0	0	0	0	0	0	0	0	0	0	0	0	0	0	0	0	0	0	0	0	0	0	0	0	0	0	0	0	0	0	0	0	0
hsa-miR-4462	0	0	0	0	0	0	0	0	0	0	0	0	0	0	0	0	0	0	0	0	0	0	0	0	0	0	0	0	0	0	0	0	0	0	0	0	0	0	0	0	0	0	0	0	0	0	0	0	0
hsa-miR-4463	0	0	0	0	0	0	0	0	0	0	0	0	0	0	0	0	0	0	0	0	0	0	0	0	0	0	0	0	0	0	0	0	0	0	0	0	0	0	0	0	0	0	0	0	0	0	0	0	0
hsa-miR-4464	0	0	0	0	0	0	0	0	0	0	0	0	0	0	0	0	0	0	0	0	0	0	0	0	0	0	0	0	0	0	0	0	0	0	0	0	0	0	0	0	0	0	0	0	0	0	0	0	0
hsa-miR-4465	0	0	0	0	0	0	0	0	0	0	0	0	0	0	0	0	0	0	0	0	0	0	0	0	0	0	0	0	0	0	0	0	0	0	0	0	0	0	0	0	0	0	0	0	0	0	0	0	0
hsa-miR-4466	0	0	0	0	0	0	0	0	0	0	0	0	0	0	0	0	0	0	0	0	0	0	0	0	0	0	0	0	0	0	0	0	0	0	0	0	0	0	0	0	0	0	0	0	0	0	0	0	0
hsa-miR-4467	0	0	0	0	0	0	0	0	0	0	0	0	0	0	0	0	2	0	0	0	0	2	0	0	0	0	0	0	0	0	0	0	0	0	0	0	0	0	0	0	0	0	0	0	0	0	0	0	0
hsa-miR-4468	0	0	0	0	0	0	0	0	0	0	0	0	0	0	0	0	0	0	0	0	0	0	0	0	0	0	0	0	0	0	0	0	0	0	0	0	0	0	0	0	0	0	0	0	0	0	0	0	0
hsa-miR-4469	0	0	0	0	0	0	0	0	0	0	0	0	0	0	0	0	0	0	0	0	0	0	0	0	0	0	0	0	0	0	0	0	0	0	0	0	0	0	0	0	0	0	0	0	0	0	0	0	0
hsa-miR-4470	1	1	0	2	1	0	0	4	1	0	2	2	0	0	0	1	0	0	0	0	1	0	1	4	0	0	0	0	0	0	1	0	1	1	0	1	0	0	0	1	0	0	1	0	0	0	0	0	2
hsa-miR-4471	0	0	0	0	0	0	0	0	0	0	0	0	0	0	0	0	0	0	0	0	0	0	0	0	0	0	0	0	0	0	0	0	0	0	0	0	0	0	0	0	0	0	0	0	0	0	0	0	0
hsa-miR-4472	0	0	0	0	0	0	0	0	0	0	0	0	0	0	0	0	0	0	0	0	0	0	0	0	0	0	0	0	0	0	0	0	0	0	0	0	0	0	0	0	0	0	0	0	0	0	0	0	0
hsa-miR-4473	0	2	0	0	0	0	1	0	0	0	0	0	0	0	1	0	4	0	0	0	0	0	0	0	0	0	0	1	0	0	0	0	0	0	0	0	0	0	0	0	0	0	1	1	0	0	0	0	0
hsa-miR-4474-3p	0	0	0	0	0	0	0	0	0	0	0	0	0	1	0	0	0	0	0	0	0	0	0	0	0	0	0	0	0	0	0	0	0	0	0	0	0	0	0	0	0	0	0	0	0	0	1	0	0
hsa-miR-4474-5p	0	0	0	0	0	0	0	0	0	0	0	0	0	0	0	0	0	0	0	0	0	0	0	0	0	0	0	0	0	0	0	0	0	0	0	0	0	0	0	0	0	0	0	0	0	0	0	0	0
hsa-miR-4475	0	0	0	0	0	0	0	0	0	0	0	0	0	0	0	0	0	0	0	0	0	0	0	0	0	0	0	0	0	0	0	0	0	0	0	0	0	0	0	0	0	0	0	0	0	0	0	0	0
hsa-miR-4476	0	0	1	0	0	0	0	0	0	0	0	0	0	0	0	0	0	0	0	0	0	0	0	0	0	0	0	0	0	0	0	0	0	0	0	0	0	0	0	0	0	0	0	0	0	0	0	0	0
hsa-miR-4477a	0	0	0	0	0	0	0	0	0	0	0	0	0	0	0	0	0	0	0	0	0	0	0	0	0	0	0	0	0	0	0	0	0	0	0	0	0	0	0	0	0	0	0	0	0	0	0	0	0
hsa-miR-4477b	0	0	0	0	0	0	0	0	0	0	1	0	0	0	0	0	0	0	0	0	0	0	0	0	0	0	0	0	0	0	0	0	0	0	0	0	0	0	0	0	0	0	0	0	0	0	0	0	0
hsa-miR-4478	0	0	0	0	0	0	0	0	0	0	0	0	0	0	0	0	0	0	0	0	0	0	0	0	0	0	0	0	0	0	0	0	0	0	0	0	0	0	0	0	0	0	0	0	0	0	0	0	0
hsa-miR-4479	0	0	0	0	0	0	0	1	0	0	0	0	0	1	0	0	1	0	0	0	0	0	0	0	0	0	0	0	0	0	0	0	0	1	1	0	0	1	0	0	0	0	0	0	0	0	1	0	0
hsa-miR-4480	0	0	0	0	0	0	0	0	0	0	0	0	0	0	0	0	0	0	0	0	0	0	0	0	0	0	0	0	0	0	0	0	0	0	0	0	0	0	0	0	0	0	0	0	0	0	0	0	0
hsa-miR-4481	0	0	0	0	0	0	0	0	0	0	0	0	0	0	0	0	0	0	0	0	0	0	0	0	0	0	0	0	0	0	0	0	0	0	0	0	0	0	0	0	0	0	0	0	0	0	0	0	0
hsa-miR-4482-3p	0	0	0	0	0	2	0	0	0	0	0	4	0	0	0	0	0	0	0	2	0	0	0	0	0	0	0	0	0	0	0	0	0	6	0	0	0	0	0	2	0	0	0	0	0	0	0	0	0
hsa-miR-4482-5p	0	0	0	0	0	0	0	0	0	0	0	0	0	0	0	0	0	0	0	0	0	0	0	0	0	0	0	0	0	0	0	0	0	1	0	0	0	0	0	0	0	0	0	0	0	0	0	0	0
hsa-miR-4483	0	0	0	0	0	0	0	0	0	0	0	0	0	0	0	0	0	0	0	0	0	0	0	0	0	0	0	0	0	0	0	0	0	0	0	0	0	0	0	0	0	0	0	0	0	0	0	0	0
hsa-miR-4484	0	0	0	0	0	0	0	0	0	0	0	0	0	0	0	0	0	0	0	0	0	0	0	0	0	0	0	0	0	0	0	0	0	0	0	0	0	0	0	0	0	0	0	0	0	0	0	0	0
hsa-miR-4485	0	0	0	0	0	0	0	0	0	0	0	0	0	0	0	0	0	0	0	0	0	0	0	0	0	0	0	0	0	0	0	0	0	0	0	0	0	0	0	0	0	0	0	0	0	0	0	0	0
hsa-miR-4486	0	0	0	0	0	0	0	0	0	0	0	0	0	0	0	0	0	0	0	0	0	0	0	0	0	0	0	0	0	0	0	0	0	0	0	0	0	0	0	0	0	0	0	0	0	0	0	0	0
hsa-miR-4487	0	0	0	0	0	0	0	0	0	0	0	0	0	0	0	0	0	0	0	0	0	0	0	0	0	0	0	0	0	0	0	0	0	0	0	0	0	0	0	0	0	0	0	0	0	0	0	0	0
hsa-miR-4488	0	0	0	0	0	0	0	0	0	0	0	0	0	0	0	0	0	0	0	0	0	0	0	0	0	0	0	0	0	0	0	0	0	0	0	0	0	0	0	0	0	0	0	0	0	0	0	0	0
hsa-miR-4489	0	0	2	0	0	0	1	0	0	0	1	0	0	0	0	0	2	0	0	0	0	1	0	0	0	0	1	1	2	1	1	0	0	3	2	0	1	1	0	2	0	0	0	0	1	0	1	1	0
hsa-miR-4490	0	0	0	0	0	0	0	0	0	0	0	0	0	0	0	0	0	0	0	0	0	0	0	0	0	0	0	0	0	0	0	0	0	0	0	0	0	0	0	0	0	0	0	0	0	0	0	0	0
hsa-miR-4491	0	0	0	0	0	0	0	0	0	0	0	0	0	0	0	0	0	0	0	0	0	0	0	0	0	0	0	0	0	0	0	0	0	0	0	0	0	0	0	0	0	0	0	0	0	0	0	0	0
hsa-miR-4492	0	0	0	0	0	0	0	0	0	0	0	0	0	0	0	0	0	0	0	0	0	0	0	0	0	0	0	0	0	0	0	0	0	0	0	0	0	0	0	0	0	0	0	0	0	0	0	0	0
hsa-miR-4493	0	0	0	0	0	0	0	0	0	0	0	0	0	0	0	0	0	0	0	0	0	0	0	0	0	0	0	0	0	0	0	0	0	1	0	0	0	0	0	0	0	0	0	0	0	0	0	0	0
hsa-miR-4494	0	0	0	0	0	0	0	0	0	0	0	0	0	0	0	0	0	0	0	0	0	0	0	0	0	0	0	0	0	0	0	0	0	0	0	0	0	0	0	0	0	0	0	0	0	0	0	0	0
hsa-miR-4495	0	0	0	0	0	0	0	0	0	0	0	0	0	0	0	0	0	0	0	0	0	0	0	0	0	0	0	0	0	0	0	0	0	0	0	0	0	0	0	0	0	0	0	0	0	0	0	0	0
hsa-miR-4496	0	0	0	0	0	0	0	0	0	0	0	0	0	0	0	0	0	0	0	0	0	0	0	0	0	0	0	0	0	0	0	0	0	0	0	0	0	0	0	0	0	0	0	0	0	0	0	0	0
hsa-miR-4497	0	0	0	0	0	0	0	0	0	0	0	0	0	0	0	0	0	0	0	0	0	0	0	0	0	0	0	0	0	0	0	0	0	0	0	0	0	0	0	0	0	0	0	0	0	0	0	0	0
hsa-miR-4498	0	0	0	0	0	1	0	0	0	0	0	0	0	0	0	0	0	0	0	1	0	0	0	0	0	0	0	0	0	0	0	0	0	0	0	0	0	0	0	0	0	0	0	0	0	0	0	0	0
hsa-miR-4499	0	0	0	0	0	0	0	0	0	0	0	0	0	0	0	0	0	0	0	0	0	0	0	0	0	0	0	0	0	0	0	0	0	0	0	0	0	0	0	0	0	0	0	0	0	0	0	0	0
hsa-miR-4500	0	0	0	0	0	0	0	0	0	0	0	0	0	0	0	0	0	0	0	0	0	0	0	0	0	0	0	0	0	0	0	0	0	0	0	0	0	0	0	0	0	0	0	0	0	0	0	0	0
hsa-miR-4501	0	0	0	0	0	0	0	0	0	0	0	0	0	0	0	0	0	0	0	0	0	0	0	0	0	0	0	0	0	0	0	0	0	0	0	0	0	0	0	0	0	0	0	0	0	0	0	0	0
hsa-miR-4502	0	0	0	0	0	0	0	0	0	0	0	0	0	0	0	0	0	0	0	0	0	0	0	0	0	0	0	0	0	0	0	0	0	0	0	0	0	0	0	0	0	0	0	0	0	0	0	0	0
hsa-miR-4503	0	0	1	0	0	0	0	0	3	0	0	0	0	0	0	0	0	0	3	3	0	0	0	0	0	0	0	0	0	0	0	0	1	0	2	0	0	0	0	0	0	0	0	0	0	0	1	0	0
hsa-miR-4504	3	1	1	1	0	0	1	0	3	0	0	1	1	4	3	1	1	0	0	4	0	0	1	0	0	0	0	1	4	1	0	0	1	2	0	0	0	5	0	0	0	2	0	0	0	0	1	0	0
hsa-miR-4505	0	0	0	0	0	0	0	0	0	0	0	0	0	0	0	0	0	0	0	0	0	0	0	0	0	0	0	0	0	0	0	0	0	0	0	0	0	0	0	0	0	0	0	0	0	0	0	0	0
hsa-miR-4506	0	0	0	0	0	0	0	0	0	0	0	0	0	0	0	0	0	0	0	0	0	0	0	0	0	0	0	0	0	0	0	0	0	0	0	0	0	0	0	0	0	0	0	0	0	0	0	0	0
hsa-miR-4507	0	0	0	0	0	0	0	0	0	0	0	0	0	0	0	0	0	0	0	0	0	0	0	0	0	0	0	0	0	0	0	0	0	0	0	0	0	0	0	0	0	0	0	0	0	0	0	0	0
hsa-miR-4508	0	0	0	0	0	0	0	0	0	0	0	0	0	2	0	0	4	0	0	3	2	1	0	0	0	0	0	0	2	0	1	0	0	4	2	0	1	0	0	0	0	0	0	1	0	0	0	3	0
hsa-miR-4509	0	0	0	0	0	0	0	0	0	0	0	0	0	0	0	0	0	0	0	0	0	0	0	0	0	0	0	0	0	0	0	0	0	0	0	0	0	0	0	0	0	0	0	0	0	0	0	0	0
hsa-miR-4510	0	0	0	0	0	0	0	0	0	0	0	0	0	0	0	0	0	0	0	0	0	0	0	0	0	0	0	0	0	0	0	0	0	0	0	0	0	0	0	0	0	0	0	0	0	0	0	0	0
hsa-miR-4511	1	1	0	0	1	0	0	0	2	0	0	0	0	0	1	0	0	0	0	2	0	0	1	0	0	0	0	3	1	0	1	1	0	2	0	0	0	0	0	0	0	1	0	0	0	0	1	0	0
hsa-miR-4512	0	0	0	0	0	0	0	0	0	0	0	0	0	0	0	0	0	0	0	0	0	0	0	0	0	0	0	0	0	0	0	0	0	0	0	0	0	0	0	0	0	0	0	0	0	0	0	0	0
hsa-miR-4513	0	0	0	0	0	0	0	0	0	0	0	0	0	0	0	0	0	0	0	0	0	0	0	0	0	0	0	0	0	0	0	0	0	0	0	0	0	0	0	0	0	0	0	0	0	0	0	0	0
hsa-miR-4514	0	0	0	0	0	0	0	0	0	0	0	0	0	0	0	0	0	0	0	0	0	0	0	0	0	0	0	0	0	0	0	0	0	0	0	0	0	0	0	0	0	0	0	0	0	0	0	0	0
hsa-miR-4515	0	0	0	0	0	0	0	0	0	0	0	0	0	0	0	0	0	0	0	0	0	0	0	0	0	0	0	0	0	0	0	0	0	0	0	0	0	0	0	0	0	0	0	0	0	0	0	0	0
hsa-miR-4516	0	0	1	0	0	0	1	0	0	0	0	0	0	6	0	1	5	0	0	2	1	1	0	0	0	0	0	1	1	0	0	0	0	3	1	0	1	1	0	0	1	0	0	3	0	0	0	0	0
hsa-miR-4517	0	0	0	0	0	0	0	0	0	0	0	0	0	0	0	0	0	0	0	0	0	0	0	0	0	0	0	0	0	0	0	0	0	0	0	0	0	0	0	0	0	0	0	0	0	0	0	0	0
hsa-miR-4518	0	0	0	0	0	0	0	0	0	0	0	0	0	0	0	0	0	0	0	0	0	0	0	0	0	0	0	0	0	0	0	0	0	0	0	0	0	0	0	0	0	0	0	0	0	0	0	0	0
hsa-miR-4519	0	0	0	0	0	0	0	0	0	0	0	0	0	0	0	0	0	0	0	0	0	0	0	0	0	0	0	0	0	0	0	0	0	0	0	0	0	0	0	0	0	0	0	0	0	0	0	0	0
hsa-miR-4520a-3p	0	0	0	0	0	0	0	0	0	0	0	0	0	0	0	0	0	0	0	0	0	0	0	0	0	0	0	0	0	0	0	0	0	0	0	0	0	0	0	0	0	0	0	0	0	0	0	0	0
hsa-miR-4520a-5p	0	0	0	0	0	0	0	0	0	0	0	0	0	0	0	0	0	0	0	0	0	0	0	0	0	0	0	0	0	0	0	0	0	0	0	0	0	0	0	0	0	0	0	0	0	0	0	0	0
hsa-miR-4520b-3p	0	0	0	0	0	0	0	0	0	0	0	0	0	0	0	0	0	0	0	0	0	0	0	0	0	0	0	0	0	0	0	0	0	0	0	0	0	0	0	0	0	0	0	0	0	0	0	0	0
hsa-miR-4520b-5p	0	0	0	0	0	0	0	0	0	0	0	0	0	0	0	0	0	0	0	0	0	0	0	0	0	0	0	0	0	0	0	0	0	0	0	0	0	0	0	0	0	0	0	0	0	0	0	0	0
hsa-miR-4521	0	0	0	0	0	0	0	0	0	0	0	0	0	0	0	0	0	0	0	0	1	0	0	0	0	0	0	0	0	0	0	0	0	0	0	0	0	0	0	0	0	0	0	0	0	0	0	0	0
hsa-miR-4522	0	0	0	0	0	0	0	0	0	0	0	0	0	0	0	0	0	0	0	0	0	0	0	0	0	0	0	0	0	0	0	0	0	0	0	0	0	0	0	0	0	0	0	0	0	0	0	0	0
hsa-miR-4523	0	0	0	0	0	0	0	0	0	0	0	0	0	0	0	0	0	0	0	0	0	0	0	0	0	0	0	0	0	0	0	0	0	0	0	0	0	0	0	0	0	0	0	0	0	0	0	0	0
hsa-miR-4524a-3p	0	0	0	0	0	0	0	0	0	0	0	0	0	0	0	0	0	0	0	0	0	0	0	0	0	0	0	0	0	0	0	0	0	0	0	0	0	0	0	0	0	0	0	0	0	0	0	0	0
hsa-miR-4524a-5p	0	0	0	0	0	0	0	0	0	0	0	0	0	0	0	0	0	0	0	0	0	0	0	0	0	0	0	0	0	0	0	0	0	0	0	0	0	0	0	0	0	0	0	0	0	0	0	0	0
hsa-miR-4524b-3p	0	0	0	0	0	0	0	0	0	0	0	0	0	0	0	0	0	0	0	0	0	0	0	0	0	0	0	0	0	0	0	0	0	0	0	0	0	0	0	0	0	0	0	0	0	0	0	0	0
hsa-miR-4524b-5p	0	0	0	0	0	0	0	0	0	0	0	0	0	0	0	0	0	0	0	0	0	0	0	0	0	0	0	0	0	0	0	0	0	0	0	0	0	0	0	0	0	0	0	0	0	0	0	0	0
hsa-miR-4525	0	0	0	0	0	0	0	0	0	0	0	0	0	0	0	0	0	0	0	0	0	0	0	0	0	0	0	0	0	0	0	0	0	0	0	0	0	0	0	0	0	0	0	0	0	0	0	0	0
hsa-miR-4526	0	0	0	0	0	0	0	0	0	0	0	0	0	0	0	0	0	0	0	0	0	0	0	0	0	0	0	0	0	0	0	0	0	0	0	0	0	0	0	0	0	0	0	0	0	0	0	0	0
hsa-miR-4527	0	0	0	0	0	0	0	0	0	0	0	0	0	0	0	0	0	0	0	0	0	0	0	0	0	0	0	0	0	0	0	0	0	0	0	0	0	0	0	0	0	0	0	0	0	0	0	0	0
hsa-miR-4528	0	0	0	0	0	0	0	0	0	0	0	0	0	0	0	0	0	0	0	0	0	0	0	0	0	0	0	0	0	0	0	0	0	0	0	0	0	0	0	0	0	0	0	0	0	0	0	0	0
hsa-miR-4529-3p	0	0	0	0	0	0	0	0	0	0	0	0	0	0	0	0	0	0	0	0	0	0	0	0	0	0	0	0	0	0	0	0	0	0	0	0	0	0	0	0	0	0	0	0	0	0	0	0	0
hsa-miR-4529-5p	0	0	0	0	0	0	0	0	0	0	0	0	0	0	0	0	0	0	0	0	0	0	0	0	0	0	0	0	0	0	0	0	0	0	0	0	0	0	0	0	0	0	0	0	0	0	0	0	0
hsa-miR-4530	0	0	0	0	0	0	0	0	0	0	0	0	0	0	0	0	0	0	0	0	0	0	0	0	0	0	0	0	0	0	0	0	0	0	0	0	0	0	0	0	0	0	0	0	0	0	0	0	0
hsa-miR-4531	0	0	0	0	0	0	0	0	0	0	0	0	0	0	0	0	0	0	0	0	0	0	0	0	0	0	0	0	0	0	0	0	0	0	0	0	0	0	0	0	0	0	0	0	0	0	0	0	0
hsa-miR-4532	0	0	0	5	0	0	0	0	0	0	0	0	0	0	0	0	0	0	1	0	1	0	0	0	0	0	0	0	0	0	0	0	0	0	0	0	0	0	0	0	0	0	0	0	0	0	0	0	0
hsa-miR-4533	1	0	0	0	1	1	1	1	0	0	0	0	0	0	1	1	1	0	0	0	0	0	1	0	1	1	1	1	0	1	0	0	0	1	0	1	1	0	0	1	0	0	0	1	1	0	0	0	1
hsa-miR-4534	0	0	0	0	0	0	0	0	0	0	0	0	0	0	0	0	0	0	0	0	0	0	0	0	0	0	0	0	0	0	0	0	0	0	0	0	0	0	0	0	0	0	0	0	0	0	0	0	0
hsa-miR-4535	0	0	0	0	0	0	0	0	0	0	0	0	0	0	0	0	0	0	0	0	0	0	0	0	0	0	0	0	0	0	0	0	0	0	0	0	0	0	0	0	0	0	0	0	0	0	0	0	0
hsa-miR-4536-3p	0	0	0	0	0	0	0	0	0	0	0	0	0	0	0	0	0	0	0	0	0	0	0	0	0	0	0	0	0	0	0	0	0	0	0	0	0	0	0	0	0	0	0	0	0	0	0	0	0
hsa-miR-4536-5p	1	0	0	0	0	0	0	0	1	0	0	0	0	0	0	0	0	0	0	1	0	0	0	0	0	0	0	0	0	0	0	0	0	0	0	0	0	0	0	0	0	0	0	0	0	0	0	0	0
hsa-miR-4537	0	0	0	0	0	0	0	0	0	0	0	0	0	0	0	0	0	0	0	0	0	0	0	0	0	0	0	0	0	0	0	0	0	0	0	0	0	0	0	0	0	0	0	0	0	0	0	0	0
hsa-miR-4538	0	0	0	0	0	0	0	0	0	0	0	0	0	0	0	0	0	0	0	0	0	0	0	0	0	0	0	0	0	0	0	0	0	0	0	0	0	0	0	0	0	0	0	0	0	0	0	0	0
hsa-miR-4539	0	0	0	0	0	0	0	0	0	0	0	0	0	0	0	0	0	0	0	0	0	0	0	0	0	0	0	0	0	0	0	0	0	0	0	0	0	0	0	0	0	0	0	0	0	0	0	0	0
hsa-miR-4540	0	0	0	0	0	0	0	0	0	0	0	0	0	0	0	0	0	0	0	0	0	0	0	0	0	0	0	0	0	0	0	0	0	0	0	0	0	0	0	0	0	0	0	0	0	0	0	0	0
hsa-miR-4632-3p	0	0	0	0	0	0	0	0	0	0	0	0	0	0	0	0	0	0	0	0	0	0	0	0	0	0	0	0	0	0	0	0	0	0	0	0	0	0	0	0	0	0	0	0	0	0	0	0	0
hsa-miR-4632-5p	0	0	0	0	0	0	0	0	0	0	0	0	0	0	0	0	0	0	0	0	0	0	0	0	0	0	0	0	0	0	0	0	0	0	0	0	0	0	0	0	0	0	0	0	0	0	0	0	0
hsa-miR-4633-3p	0	0	0	0	0	0	0	0	0	0	0	0	0	0	0	0	0	0	0	0	0	0	0	0	0	0	0	0	0	0	0	0	0	0	0	0	0	0	0	0	0	0	0	0	0	0	0	0	0
hsa-miR-4633-5p	0	0	0	0	0	0	0	0	0	0	0	0	0	0	0	0	0	0	0	0	0	0	0	0	0	0	0	0	0	0	0	0	0	0	0	0	0	0	0	0	0	0	0	0	0	0	0	0	0
hsa-miR-4634	0	0	0	0	0	0	0	0	0	0	0	0	0	0	0	0	0	0	0	0	0	0	0	0	0	0	0	0	0	0	0	0	0	0	0	0	0	0	0	0	0	0	0	0	0	0	0	0	0
hsa-miR-4635	0	0	0	0	0	0	0	0	0	0	0	0	0	0	0	0	1	0	0	0	0	0	0	0	0	0	0	0	0	0	0	0	0	0	0	0	0	0	0	0	0	0	0	0	0	0	0	0	0
hsa-miR-4636	0	0	0	0	0	0	0	0	0	0	0	0	0	0	0	0	0	0	0	0	0	0	0	0	0	0	0	0	0	0	0	0	0	0	0	0	0	0	0	0	0	0	0	0	0	0	0	0	0
hsa-miR-4637	0	2	0	0	0	0	0	0	1	0	0	0	0	3	0	0	0	0	0	0	0	0	0	0	0	0	1	0	1	0	0	0	0	0	0	0	0	0	0	0	0	0	0	0	0	0	2	0	0
hsa-miR-4638-3p	0	0	0	0	0	0	0	0	0	0	0	0	0	0	0	0	0	0	0	0	0	0	0	0	0	0	0	0	0	0	0	0	0	0	0	0	0	0	0	0	0	0	0	0	0	0	0	0	0
hsa-miR-4638-5p	0	1	0	0	0	0	0	0	0	0	0	0	0	0	0	0	0	0	0	0	0	0	0	0	0	0	0	1	0	0	0	0	0	0	0	0	0	0	0	0	0	0	0	1	0	0	0	0	0
hsa-miR-4639-3p	0	0	0	0	0	0	0	0	0	0	0	0	0	0	0	0	0	0	0	0	0	0	0	0	0	0	0	0	0	0	0	0	0	0	0	0	0	0	0	0	0	0	0	0	0	0	0	0	0
hsa-miR-4639-5p	0	0	0	0	0	0	0	0	0	0	0	0	0	0	0	0	0	0	0	0	0	0	0	0	0	0	0	0	0	0	0	0	0	0	1	0	0	0	0	0	0	0	0	0	0	0	0	0	0
hsa-miR-4640-3p	0	0	0	0	0	0	0	0	0	0	0	0	0	0	0	0	0	0	0	0	0	0	0	0	0	0	0	0	0	0	0	0	0	0	0	0	0	0	0	0	0	0	0	0	0	0	0	0	0
hsa-miR-4640-5p	0	0	0	0	0	0	0	0	0	0	0	0	0	0	0	0	0	0	0	0	0	0	0	0	0	0	0	0	0	0	0	0	0	0	0	0	0	0	0	0	0	0	0	0	0	0	0	0	0
hsa-miR-4641	0	0	0	0	0	0	0	0	0	0	0	0	0	0	0	0	0	0	0	0	0	0	0	0	0	0	0	0	0	0	0	0	0	0	0	0	0	0	0	0	0	0	0	0	0	0	0	0	0
hsa-miR-4642	0	0	0	0	0	0	0	0	0	0	0	0	0	0	0	0	0	0	0	0	0	0	0	0	0	0	0	0	0	0	0	0	0	0	0	0	0	0	0	0	0	0	0	0	0	0	0	0	0
hsa-miR-4643	0	0	0	0	0	0	0	0	0	0	0	0	0	0	0	0	0	0	0	0	0	0	0	0	0	0	0	0	0	0	0	0	0	0	0	0	0	0	0	0	0	0	0	0	0	0	0	0	0
hsa-miR-4644	0	0	0	0	0	0	0	0	0	0	0	0	0	0	0	0	1	0	0	0	0	0	0	0	0	0	0	0	0	0	0	0	0	0	0	0	0	0	0	0	0	0	0	0	0	0	0	0	0
hsa-miR-4645-3p	0	1	0	0	0	0	0	0	0	0	0	0	2	0	0	0	0	3	0	0	1	0	0	1	0	0	0	0	0	0	0	1	0	0	0	0	0	0	0	0	0	0	0	0	0	0	0	0	0
hsa-miR-4645-5p	0	0	0	0	0	0	0	0	0	0	0	0	0	0	0	0	0	0	0	0	0	0	0	0	0	0	0	0	0	0	0	0	0	0	0	0	0	0	0	0	0	0	0	0	0	0	0	0	0
hsa-miR-4646-3p	0	0	0	0	0	0	0	0	0	0	0	0	0	0	0	0	0	0	0	0	0	0	0	0	0	0	0	0	0	0	0	0	0	0	0	0	0	0	0	0	0	0	0	0	0	0	0	0	0
hsa-miR-4646-5p	0	0	0	0	0	0	1	2	1	0	0	0	0	4	0	0	11	0	0	0	0	0	0	0	0	0	1	1	2	0	0	0	0	4	0	2	0	2	0	4	0	0	0	1	0	1	0	0	0
hsa-miR-4647	0	1	1	0	0	0	0	0	0	0	0	0	0	0	0	1	0	0	0	0	0	0	0	1	0	1	0	0	0	0	0	0	0	2	0	2	0	0	0	0	0	0	0	0	0	0	0	0	0
hsa-miR-4648	0	0	0	0	0	0	0	0	0	0	0	0	0	0	0	1	0	0	0	0	0	0	0	0	0	0	0	0	0	0	0	0	0	0	0	0	0	0	0	0	0	0	0	0	0	0	0	0	0
hsa-miR-4649-3p	0	0	0	0	0	0	0	0	0	0	0	0	0	0	0	0	0	0	0	0	0	0	0	0	0	0	0	0	0	0	0	0	0	0	0	0	0	0	0	0	0	0	0	0	0	0	0	0	0
hsa-miR-4649-5p	0	0	0	0	0	0	0	0	0	0	0	0	0	0	0	0	0	0	0	0	0	0	0	0	0	0	0	0	0	0	0	0	0	0	0	0	0	0	0	0	0	0	0	0	0	0	0	0	0
hsa-miR-4650-3p	0	0	0	0	0	0	0	0	0	0	0	0	0	0	0	0	0	0	0	0	0	0	0	0	0	0	0	0	0	0	0	0	0	0	0	0	0	0	0	0	0	0	0	0	0	0	0	0	0
hsa-miR-4650-5p	0	0	0	0	0	0	0	0	0	0	0	0	0	0	0	0	0	0	0	0	0	0	0	0	0	0	0	0	0	0	0	0	0	0	0	0	0	0	0	0	0	0	0	0	0	0	0	0	0
hsa-miR-4651	0	0	0	0	0	0	0	0	0	0	0	0	0	0	0	0	0	0	0	0	0	0	0	0	0	0	0	0	0	0	0	0	0	0	0	0	0	0	0	0	0	0	0	0	0	0	0	0	0
hsa-miR-4652-3p	0	0	0	0	0	0	0	0	0	0	0	0	0	0	0	0	0	0	0	0	0	0	0	0	0	0	0	0	0	0	0	0	0	0	0	0	0	0	0	0	0	0	0	0	0	0	0	0	0
hsa-miR-4652-5p	0	0	0	0	0	0	0	0	0	0	0	0	0	0	0	0	0	0	0	0	0	0	0	0	0	0	0	0	0	0	0	0	0	0	0	0	0	0	0	0	0	0	0	0	0	0	0	0	0
hsa-miR-4653-3p	0	0	0	0	0	0	0	0	0	0	0	0	0	0	0	0	0	0	0	0	0	0	0	0	0	0	0	0	0	0	0	0	0	0	0	0	0	0	0	0	0	0	0	0	0	0	0	0	0
hsa-miR-4653-5p	0	0	0	0	0	0	0	0	0	0	0	0	0	0	0	0	0	0	0	0	0	0	0	0	0	0	0	0	0	0	0	0	0	0	0	0	0	0	0	0	0	0	0	0	0	0	0	0	0
hsa-miR-4654	0	0	0	0	0	0	0	0	0	0	0	0	0	0	1	0	0	0	0	0	0	0	0	0	1	0	0	0	0	0	0	0	0	0	0	0	0	0	0	0	0	0	0	0	0	0	0	0	0
hsa-miR-4655-3p	0	0	0	0	0	0	0	0	0	0	0	0	0	0	0	0	0	0	0	0	0	0	0	0	0	0	0	0	0	0	0	0	0	0	0	0	0	0	0	0	0	0	0	0	0	0	0	0	0
hsa-miR-4655-5p	0	0	0	0	0	0	0	0	0	0	0	0	0	0	0	0	0	0	0	0	0	0	0	0	0	0	0	0	0	0	0	0	0	0	0	0	0	0	0	0	0	0	0	0	0	0	0	0	1
hsa-miR-4656	0	0	0	0	0	0	0	0	0	0	0	0	0	0	0	0	0	0	0	0	0	0	0	0	0	0	0	0	0	0	0	0	0	0	0	0	0	0	0	0	0	0	0	0	0	0	0	0	0
hsa-miR-4657	0	0	0	0	0	0	0	0	0	0	0	0	0	0	0	0	1	0	0	0	0	0	0	0	0	0	0	0	0	0	0	0	0	0	0	0	0	0	0	1	0	0	0	0	0	0	0	0	0
hsa-miR-4658	0	0	0	0	0	0	0	0	0	0	0	0	0	0	0	0	0	0	0	0	0	0	0	0	0	2	0	0	0	0	0	1	0	0	0	0	0	0	0	0	0	0	0	0	0	1	0	0	0
hsa-miR-4659a-3p	0	1	0	1	0	1	1	0	3	0	0	0	1	0	2	0	1	0	0	3	0	0	2	1	2	0	1	2	4	1	1	0	0	4	1	1	1	4	0	1	1	1	1	0	0	1	2	1	0
hsa-miR-4659a-5p	0	0	0	0	0	0	0	0	0	0	0	0	0	1	0	0	0	0	0	0	3	0	0	0	0	0	0	0	0	0	0	0	0	0	0	0	0	0	0	0	0	0	0	0	0	0	0	0	0
hsa-miR-4659b-3p	1	1	0	1	0	1	3	2	0	0	1	0	0	3	0	1	0	2	2	1	0	1	1	2	1	0	0	1	3	0	0	0	0	0	1	0	0	2	0	2	0	0	0	0	0	2	1	0	0
hsa-miR-4659b-5p	0	0	0	0	0	0	0	0	0	0	1	0	0	0	0	0	0	0	0	0	0	0	0	0	0	0	0	0	0	0	0	0	0	0	0	0	0	0	0	0	0	0	0	0	0	0	0	0	0
hsa-miR-4660	0	0	1	0	0	0	0	0	0	0	1	0	0	0	0	0	0	0	0	0	0	0	0	0	0	0	0	0	0	0	0	0	0	0	0	0	0	0	0	0	0	0	0	0	0	0	0	0	0
hsa-miR-4661-3p	0	0	0	0	0	0	0	0	0	0	0	0	0	0	0	0	0	0	0	0	0	0	0	0	0	0	0	0	0	0	0	0	0	0	0	0	0	0	0	0	0	0	0	0	0	0	0	0	0
hsa-miR-4661-5p	4	1	1	0	0	0	1	3	1	1	0	1	2	0	2	0	2	2	0	1	2	2	2	2	0	0	1	1	2	0	0	1	0	1	0	0	0	3	0	0	0	0	2	1	0	1	3	0	1
hsa-miR-4662a-3p	0	0	0	0	0	0	0	0	0	0	0	0	0	0	0	0	0	0	0	0	0	0	0	0	0	0	0	0	0	0	0	0	0	0	0	0	0	0	0	0	0	0	0	0	0	0	0	0	0
hsa-miR-4662a-5p	0	0	0	0	0	0	0	0	0	0	1	1	0	0	1	0	0	0	0	0	0	0	1	0	0	0	0	0	0	0	0	0	0	1	0	0	1	0	0	0	0	0	0	0	0	0	0	0	0
hsa-miR-4662b	0	0	0	0	0	0	0	0	0	0	0	0	0	0	0	0	0	0	0	0	0	0	0	0	0	0	0	0	0	0	0	0	0	0	0	0	0	0	0	0	0	0	0	0	0	0	0	0	0
hsa-miR-4663	0	0	0	0	0	0	0	0	0	0	0	0	0	0	0	0	0	0	0	0	0	0	0	0	0	0	0	0	0	0	0	0	0	0	0	0	0	0	0	0	0	0	0	0	0	0	0	0	0
hsa-miR-4664-3p	0	0	1	0	2	0	1	4	0	0	0	1	2	0	0	3	2	0	2	0	2	0	3	0	0	2	0	1	0	1	0	2	0	1	0	1	0	0	0	0	1	0	1	0	0	0	1	0	1
hsa-miR-4664-5p	0	0	0	0	0	0	0	0	0	0	0	0	0	0	0	0	0	0	0	0	0	0	0	0	0	0	0	0	0	0	0	0	0	0	0	0	0	0	0	0	0	0	0	0	0	0	0	0	0
hsa-miR-4665-3p	0	0	0	0	0	0	0	0	0	0	0	0	0	0	0	0	0	0	0	0	0	0	0	0	0	0	0	0	0	0	0	0	0	0	0	0	0	0	0	0	0	0	0	0	0	0	0	0	0
hsa-miR-4665-5p	0	0	1	1	2	13	1	5	0	2	4	4	0	0	2	2	1	3	0	0	0	2	1	1	4	0	1	0	2	1	0	1	0	0	1	0	0	0	1	0	1	0	2	1	1	1	1	0	3
hsa-miR-4666a-3p	0	0	0	0	0	0	0	0	0	0	0	0	0	0	0	0	0	0	0	0	0	0	0	0	0	0	0	0	0	0	0	0	0	0	0	0	0	0	0	0	0	0	0	0	0	0	0	0	0
hsa-miR-4666a-5p	0	0	0	0	0	0	0	0	0	0	0	0	0	0	0	0	0	0	0	0	0	0	0	0	0	0	0	0	0	0	0	0	0	0	0	0	0	0	0	0	0	0	0	0	0	0	0	0	0
hsa-miR-4666b	0	0	0	0	0	0	0	0	0	0	0	0	0	0	0	0	0	0	0	0	0	0	0	0	0	0	0	0	0	0	0	0	0	0	0	0	0	0	0	0	0	0	0	0	0	0	0	0	0
hsa-miR-4667-3p	0	0	0	0	0	0	0	0	0	0	0	0	0	0	0	0	0	0	0	0	0	0	0	0	0	0	0	0	0	0	0	0	0	0	0	0	0	0	0	0	0	0	0	0	0	0	0	0	0
hsa-miR-4667-5p	0	0	0	0	0	0	0	2	0	0	0	0	0	1	0	0	0	1	0	1	0	0	0	1	0	0	0	0	0	0	0	0	0	1	1	0	0	0	0	0	0	0	0	0	0	0	0	0	0
hsa-miR-4668-3p	0	0	0	0	0	0	0	0	0	0	0	0	0	0	0	0	0	0	0	0	0	0	0	0	0	0	0	0	0	0	0	0	0	0	0	0	0	0	0	0	0	0	0	0	0	0	0	0	0
hsa-miR-4668-5p	0	1	2	0	0	0	0	0	0	0	0	0	1	0	0	0	1	0	0	0	1	0	0	0	0	0	0	0	2	1	0	0	0	0	0	0	2	0	0	2	0	0	0	0	0	0	1	0	0
hsa-miR-4669	0	20	24	0	3	0	26	0	0	0	0	0	0	0	4	0	21	2	0	0	0	4	0	0	1	11	11	0	0	0	0	0	4	0	0	3	0	0	0	0	12	4	0	6	1	0	17	14	0
hsa-miR-4670-3p	0	0	0	0	0	0	0	0	0	0	0	0	0	0	0	0	0	0	0	0	0	0	0	0	0	0	0	0	0	0	0	0	0	0	0	0	0	0	0	0	0	0	0	0	0	0	0	0	0
hsa-miR-4670-5p	0	0	0	0	0	0	0	0	0	0	0	0	0	0	0	0	0	0	0	0	0	0	0	0	0	0	0	0	0	0	0	0	0	0	0	0	0	0	0	0	0	0	0	0	0	0	0	0	0
hsa-miR-4671-3p	0	0	0	0	0	0	0	0	0	0	0	0	0	0	0	0	0	0	0	0	0	0	0	0	0	0	0	0	0	0	0	0	0	0	0	0	0	0	0	0	0	0	0	0	0	0	0	0	0
hsa-miR-4671-5p	0	0	0	0	0	0	0	0	0	0	0	0	0	0	0	0	0	0	0	0	0	0	0	0	0	0	0	0	0	0	0	0	0	0	0	0	0	0	0	0	0	0	0	0	0	0	0	0	0
hsa-miR-4672	0	0	1	1	0	0	0	0	0	0	1	0	0	0	0	0	2	0	0	0	0	0	0	0	0	0	0	0	1	0	0	0	0	0	0	0	0	0	0	0	0	0	0	0	0	0	1	0	0
hsa-miR-4673	0	0	0	0	0	0	0	0	0	0	0	0	0	0	0	0	0	0	0	0	0	0	0	0	0	0	0	0	0	0	0	0	0	0	0	0	0	0	0	0	0	0	0	0	0	0	0	0	0
hsa-miR-4674	0	0	0	0	0	0	0	0	0	0	0	0	0	0	0	0	0	0	0	0	0	0	0	0	0	0	0	0	0	0	0	0	0	0	0	0	0	0	0	0	0	0	0	0	0	0	0	0	0
hsa-miR-4675	0	0	0	0	0	0	0	0	0	0	0	0	0	0	0	0	0	0	0	0	0	0	0	0	0	0	0	0	0	0	0	0	0	0	0	0	0	0	0	0	0	0	0	0	0	0	0	0	0
hsa-miR-4676-3p	0	1	0	0	0	0	0	0	0	0	0	2	0	1	1	1	0	0	0	0	3	0	0	1	0	0	0	1	1	0	0	0	0	0	0	2	0	0	0	0	0	2	0	0	0	0	0	0	0
hsa-miR-4676-5p	0	0	0	0	0	0	0	0	0	0	0	0	0	0	0	0	0	0	0	0	0	0	0	0	0	0	0	0	0	0	0	0	0	0	0	1	0	0	0	0	0	0	0	0	0	0	0	0	1
hsa-miR-4677-3p	0	2	0	1	3	1	3	0	2	2	2	1	0	1	3	2	1	1	6	2	5	0	1	0	2	0	1	1	1	1	0	1	1	0	1	0	1	0	0	0	2	2	1	0	0	0	1	0	0
hsa-miR-4677-5p	0	0	0	0	1	0	0	0	0	0	0	0	0	0	0	0	0	0	0	2	0	0	0	0	0	0	0	0	0	0	0	0	0	0	0	0	0	0	0	0	0	0	0	0	0	0	0	0	0
hsa-miR-4678	0	0	0	0	0	0	0	0	0	0	0	0	0	0	0	0	0	0	0	0	0	0	0	0	0	0	0	0	0	0	0	0	0	0	0	0	0	0	0	0	0	0	0	0	0	0	0	0	0
hsa-miR-4679	0	0	0	0	0	0	0	0	0	0	0	0	0	0	0	0	0	0	0	0	0	0	0	0	0	0	0	0	0	0	0	0	0	0	0	0	0	0	0	0	0	0	0	0	0	0	0	0	0
hsa-miR-4680-3p	0	0	0	0	0	0	0	0	0	0	0	0	0	0	0	0	0	0	0	0	0	0	0	0	0	0	0	0	0	0	0	0	0	0	0	0	0	0	0	0	0	0	0	0	0	0	0	0	0
hsa-miR-4680-5p	0	0	0	0	0	0	0	0	0	0	0	0	0	0	0	0	0	0	0	0	0	0	0	0	0	0	0	0	0	0	0	0	0	0	0	0	0	0	0	0	0	0	0	0	0	0	0	0	0
hsa-miR-4681	0	0	0	0	0	0	0	0	0	0	0	0	0	0	0	0	0	0	0	0	0	0	0	0	0	0	0	0	0	0	0	0	0	0	0	0	0	0	0	0	0	0	0	0	0	0	0	0	0
hsa-miR-4682	0	0	0	0	0	0	0	0	0	0	0	0	0	0	0	0	0	0	0	0	0	0	0	0	0	0	0	0	0	0	0	0	0	0	0	0	0	0	0	0	0	0	0	0	0	0	0	0	0
hsa-miR-4683	0	0	0	0	1	0	0	0	0	0	0	0	0	0	0	0	0	0	0	0	0	0	0	0	0	0	0	0	0	0	0	0	0	0	0	0	0	0	0	0	0	0	0	0	0	0	0	0	0
hsa-miR-4684-3p	0	0	0	0	0	0	0	0	0	0	0	0	0	0	0	0	0	0	0	0	0	0	0	0	0	0	0	0	0	0	0	0	0	0	0	0	0	0	0	0	0	0	0	0	0	0	0	0	0
hsa-miR-4684-5p	0	0	0	0	0	0	0	0	0	0	0	0	0	0	0	0	0	0	0	0	0	0	0	0	0	0	0	0	0	0	0	0	0	0	0	0	0	0	0	0	0	0	0	0	0	0	0	0	0
hsa-miR-4685-3p	0	0	0	0	0	0	0	0	0	0	0	0	0	0	0	0	2	0	0	1	0	0	0	1	0	0	0	0	0	0	0	0	0	0	0	0	0	1	0	0	0	0	0	0	0	0	0	0	0
hsa-miR-4685-5p	0	0	0	0	0	0	0	0	0	0	0	0	0	0	0	0	0	0	0	0	0	0	0	0	0	0	0	0	0	0	0	0	0	0	0	0	0	0	0	0	0	0	0	0	0	0	0	0	0
hsa-miR-4686	0	0	0	0	0	0	0	0	0	0	0	0	0	0	0	0	0	0	0	0	0	0	0	0	0	0	0	0	0	0	0	1	0	0	0	0	0	0	0	0	0	0	2	0	0	1	0	0	0
hsa-miR-4687-3p	0	0	0	0	0	0	0	0	0	0	0	0	0	0	0	0	0	0	0	1	0	0	0	0	0	0	0	0	0	0	0	0	0	0	0	0	0	0	0	0	0	0	0	0	0	0	0	0	0
hsa-miR-4687-5p	0	0	0	0	0	0	0	0	0	0	0	0	0	0	0	0	0	0	0	0	0	0	0	0	0	0	0	0	0	0	0	0	0	0	0	0	0	0	0	0	0	0	0	0	0	0	0	0	0
hsa-miR-4688	0	0	0	0	0	0	0	0	0	0	0	0	0	0	0	0	0	0	0	0	0	0	0	0	0	0	0	0	0	0	0	0	0	0	0	0	0	0	0	1	0	0	0	0	0	0	0	0	0
hsa-miR-4689	0	0	0	0	0	0	0	0	0	0	0	0	0	0	0	0	0	0	0	0	0	0	0	0	0	0	0	0	0	0	0	0	0	0	0	0	0	0	0	0	0	0	0	0	0	0	0	0	0
hsa-miR-4690-3p	0	0	0	0	2	0	0	0	0	0	0	0	0	0	0	0	0	0	0	0	0	0	0	0	0	1	0	0	1	1	0	0	0	0	0	0	0	1	0	0	0	0	0	0	0	0	0	0	0
hsa-miR-4690-5p	0	0	0	0	0	0	0	0	0	0	0	0	0	0	0	0	0	0	0	0	0	0	0	0	0	0	0	0	0	0	0	0	0	0	0	0	0	0	0	0	0	0	0	0	0	0	0	0	0
hsa-miR-4691-3p	0	0	0	0	0	0	0	0	0	0	0	0	0	0	0	0	0	0	0	0	0	0	0	0	0	0	0	0	0	0	0	0	0	0	0	0	0	0	0	0	0	0	0	0	0	0	0	0	0
hsa-miR-4691-5p	0	0	0	0	0	0	0	0	0	0	0	0	0	0	0	0	0	0	0	0	0	0	0	0	0	0	0	0	0	0	0	0	0	0	0	0	0	0	0	0	0	0	0	0	0	0	0	0	0
hsa-miR-4692	0	0	0	0	0	0	0	0	0	0	0	0	0	0	0	0	0	0	0	0	0	0	0	0	0	0	0	0	0	0	0	0	0	0	0	0	0	0	0	0	0	0	0	0	0	0	0	0	0
hsa-miR-4693-3p	0	0	0	0	0	0	0	0	0	0	0	0	0	0	0	0	0	0	0	0	0	0	0	0	0	0	0	0	0	0	0	0	0	0	0	0	0	0	0	0	0	0	0	0	0	0	0	0	0
hsa-miR-4693-5p	0	0	0	0	0	0	0	0	0	0	0	0	0	0	0	0	0	0	0	0	0	0	0	0	0	0	0	0	0	0	0	0	0	0	0	0	0	0	0	0	0	0	0	0	0	0	0	0	0
hsa-miR-4694-3p	0	0	0	0	0	0	0	0	0	0	0	0	0	0	0	0	0	0	0	0	0	0	0	0	0	0	0	0	0	0	0	0	0	0	0	0	0	0	0	0	0	0	0	0	0	0	0	0	0
hsa-miR-4694-5p	0	0	0	0	0	0	0	0	0	0	0	0	0	0	0	0	0	0	0	0	0	0	0	0	0	0	0	0	0	0	0	0	0	0	0	0	0	0	0	0	0	0	0	0	0	0	0	0	0
hsa-miR-4695-3p	0	0	0	0	0	0	0	0	0	0	0	0	0	0	0	0	0	0	0	0	0	0	0	0	0	0	0	0	0	0	0	0	0	0	0	0	0	0	0	0	0	0	0	0	0	0	0	0	0
hsa-miR-4695-5p	0	0	0	0	0	0	0	0	0	0	0	0	0	0	0	0	0	0	0	0	0	0	0	0	0	0	0	0	0	0	0	0	0	0	0	0	0	0	0	0	0	0	0	0	0	0	0	0	0
hsa-miR-4696	0	0	0	0	0	0	0	0	0	0	0	0	0	0	0	0	0	0	0	0	0	0	0	0	0	0	0	0	0	0	0	0	0	0	0	0	0	0	0	0	0	0	0	0	0	0	0	0	0
hsa-miR-4697-3p	0	0	0	0	0	0	0	0	0	0	0	0	0	0	0	0	0	0	0	0	0	0	0	0	0	0	0	0	0	0	0	0	0	0	0	0	0	0	0	0	0	0	0	0	0	0	0	0	0
hsa-miR-4697-5p	0	0	0	0	0	0	0	0	0	0	0	0	0	0	0	0	0	0	0	0	0	0	0	0	0	0	0	0	0	0	0	0	0	0	0	0	0	0	0	0	0	0	0	0	0	0	0	0	0
hsa-miR-4698	0	0	0	0	0	0	0	0	0	0	0	0	0	0	0	0	0	0	0	0	0	0	0	0	0	0	0	0	0	0	0	0	0	0	0	0	0	0	0	0	0	0	0	0	0	0	0	0	0
hsa-miR-4699-3p	0	0	0	0	0	0	0	0	0	0	0	0	0	0	0	0	0	0	0	0	0	0	0	0	0	0	0	0	0	0	0	0	0	0	0	0	0	0	0	0	0	0	0	0	0	0	0	0	0
hsa-miR-4699-5p	0	0	0	0	0	0	0	0	0	0	0	0	0	0	0	0	0	0	0	0	0	0	0	0	0	0	0	0	0	0	0	0	0	0	0	0	0	0	0	0	0	0	0	0	0	0	0	0	0
hsa-miR-4700-3p	0	0	0	0	0	0	0	0	0	0	0	0	0	0	0	0	0	0	0	0	0	0	0	0	0	0	0	0	0	0	0	0	0	0	0	0	0	0	0	0	0	0	0	0	0	0	0	0	0
hsa-miR-4700-5p	0	0	0	0	0	0	0	0	0	0	0	0	0	0	0	0	0	0	0	0	0	0	0	0	0	0	0	0	0	0	0	0	0	0	0	0	0	0	0	0	0	0	0	0	0	0	0	0	0
hsa-miR-4701-3p	0	0	0	0	0	0	0	0	0	0	0	0	0	0	0	0	0	0	0	0	0	0	0	0	0	0	0	0	0	0	0	0	0	0	0	0	0	0	0	0	0	0	0	0	0	0	0	0	0
hsa-miR-4701-5p	0	0	0	0	0	0	0	0	0	0	0	0	0	0	0	0	0	0	0	0	0	0	0	0	0	0	0	0	0	0	0	0	0	0	0	0	0	0	0	0	0	0	0	0	0	0	0	0	0
hsa-miR-4703-3p	0	0	0	0	0	0	0	0	0	0	0	0	0	0	0	0	0	0	0	0	0	0	0	0	0	0	0	0	0	0	0	0	0	0	0	0	0	0	0	0	0	0	0	0	0	0	0	0	0
hsa-miR-4703-5p	0	0	0	0	0	0	0	0	0	0	0	0	0	0	0	0	0	0	0	0	0	0	0	0	0	0	0	0	0	0	0	0	0	0	0	0	0	0	0	0	0	0	0	0	0	0	0	0	0
hsa-miR-4704-3p	0	0	0	0	0	0	0	0	0	0	0	0	0	0	0	0	0	0	0	0	0	0	0	0	0	0	0	0	0	0	0	0	0	0	0	0	0	0	0	0	0	0	0	0	0	0	0	0	0
hsa-miR-4704-5p	0	0	0	0	0	0	0	0	0	0	0	0	0	0	0	0	0	0	0	0	0	0	0	0	0	0	0	0	0	0	0	0	0	0	0	0	0	0	0	0	0	0	0	0	0	0	0	0	0
hsa-miR-4705	0	0	0	0	0	0	0	0	0	0	0	0	0	0	0	0	0	0	0	0	0	0	0	0	0	0	0	0	0	0	0	0	0	0	0	0	0	0	0	0	0	0	0	0	0	0	0	0	0
hsa-miR-4706	0	0	0	0	0	0	0	0	0	0	0	0	0	0	0	0	0	0	0	0	0	0	0	0	0	0	0	0	0	0	0	0	0	0	0	0	0	0	0	0	0	0	0	0	0	0	0	0	0
hsa-miR-4707-3p	0	0	0	0	0	0	0	0	0	0	0	0	0	0	0	0	0	0	0	0	0	0	0	0	0	0	0	0	0	0	0	0	0	0	0	0	0	0	0	0	0	0	0	0	0	0	0	0	0
hsa-miR-4707-5p	0	0	0	0	0	0	0	0	0	0	0	0	0	0	0	0	0	0	0	0	0	0	0	0	0	0	0	0	0	0	0	0	0	0	0	0	0	0	0	0	0	0	0	0	0	0	0	0	0
hsa-miR-4708-3p	0	0	0	0	0	0	0	0	0	0	0	0	0	0	0	0	0	0	0	1	0	0	0	0	0	0	0	0	0	0	0	0	0	0	0	0	0	0	0	0	0	0	0	0	0	0	0	0	0
hsa-miR-4708-5p	0	0	0	0	0	0	0	0	0	0	0	0	0	0	0	0	0	0	0	0	0	0	0	0	0	0	0	0	0	0	0	0	0	0	0	0	0	0	0	0	0	0	0	0	0	0	0	0	0
hsa-miR-4709-3p	0	0	0	0	0	0	0	0	0	0	0	0	0	0	0	0	0	0	0	0	0	0	0	0	0	0	0	0	0	0	0	0	0	0	0	0	0	0	0	0	0	0	0	0	0	0	0	0	0
hsa-miR-4709-5p	0	0	0	0	0	0	0	0	0	0	0	0	0	0	0	0	0	0	0	1	0	0	0	0	0	0	0	0	0	0	0	0	0	0	0	0	0	0	0	0	0	0	0	0	0	0	0	0	0
hsa-miR-4710	0	0	0	0	0	0	0	0	0	0	0	0	0	0	0	0	0	0	0	0	0	0	0	0	0	0	0	0	0	0	0	0	0	0	0	0	0	0	0	0	0	0	0	0	0	0	0	0	0
hsa-miR-4711-3p	0	0	0	0	0	0	0	0	0	0	0	0	0	0	0	0	0	0	0	0	0	0	0	0	0	0	0	0	0	0	0	0	0	0	0	0	0	0	0	0	0	0	0	0	0	0	0	0	0
hsa-miR-4711-5p	0	0	0	0	0	0	0	0	0	0	0	0	0	0	0	0	0	0	0	0	0	0	0	0	0	0	0	0	0	0	0	0	0	0	0	0	0	0	0	0	0	0	0	0	0	0	0	0	0
hsa-miR-4712-3p	0	0	0	0	0	0	0	0	0	0	0	0	0	0	0	0	0	0	0	0	0	0	0	0	0	0	0	0	0	0	0	0	0	0	0	0	0	0	0	0	0	0	0	0	0	0	0	0	0
hsa-miR-4712-5p	0	0	0	0	0	0	0	0	0	0	0	0	0	0	0	0	0	0	0	0	0	0	0	0	0	0	0	0	0	0	0	0	0	0	0	0	0	0	0	0	0	0	0	0	0	0	0	0	0
hsa-miR-4713-3p	0	0	0	0	0	0	0	0	0	0	0	0	0	0	0	0	0	0	0	0	0	0	0	0	0	0	0	0	0	0	0	0	0	0	0	0	0	0	0	0	0	0	0	0	0	0	0	0	0
hsa-miR-4713-5p	0	0	0	0	0	0	0	0	0	0	0	0	0	0	0	0	0	0	0	0	0	0	0	0	0	0	0	0	0	0	0	0	0	0	0	0	0	0	0	0	0	0	0	0	0	0	0	0	0
hsa-miR-4714-3p	0	0	0	0	0	0	0	0	0	0	0	0	0	0	0	0	0	0	0	0	0	0	0	0	0	0	0	0	0	0	0	0	0	0	0	0	0	0	0	0	0	0	0	0	0	0	0	0	0
hsa-miR-4714-5p	1	0	0	0	0	0	0	0	0	0	0	0	0	1	0	0	1	0	0	0	0	0	0	0	0	0	0	0	1	0	0	0	0	0	0	0	0	0	0	0	0	0	0	0	0	0	0	0	0
hsa-miR-4715-3p	0	0	0	0	0	0	0	0	0	0	0	0	0	0	0	0	0	0	0	0	0	0	0	0	0	0	0	0	0	0	0	0	0	0	0	0	0	0	0	0	0	0	0	0	0	0	0	0	0
hsa-miR-4715-5p	0	0	0	0	0	0	0	0	0	0	0	0	0	0	0	0	0	0	0	0	0	0	0	0	0	0	0	0	0	0	0	0	0	0	0	0	0	0	0	0	0	0	0	0	0	0	0	0	0
hsa-miR-4716-3p	0	0	0	0	0	0	0	0	0	0	0	0	0	0	0	0	1	0	0	0	0	0	0	0	0	0	0	0	0	0	0	0	0	0	0	1	0	0	0	0	0	0	0	0	0	0	0	0	0
hsa-miR-4716-5p	0	0	0	0	0	0	0	0	0	0	0	0	0	0	0	0	0	0	0	0	0	0	0	0	0	0	0	0	0	0	0	0	0	0	0	0	0	0	0	0	0	0	0	0	0	0	0	0	0
hsa-miR-4717-3p	0	0	0	0	0	0	0	0	0	0	0	0	0	0	0	0	0	0	0	0	0	0	0	0	0	0	0	0	0	0	0	0	0	0	0	0	0	0	0	0	0	0	0	0	0	0	0	0	0
hsa-miR-4717-5p	0	0	0	0	0	0	0	0	0	0	0	0	0	0	0	0	0	0	0	0	0	0	0	0	0	0	0	0	0	0	0	0	0	0	0	0	0	0	0	0	0	0	0	0	0	0	0	0	0
hsa-miR-4718	0	0	0	0	0	0	0	0	0	0	0	0	0	0	0	0	0	0	0	0	0	0	0	0	0	0	0	0	0	0	0	0	0	0	0	0	0	0	0	0	0	0	0	0	0	0	0	0	0
hsa-miR-4719	0	0	0	0	0	0	0	0	0	0	0	0	0	0	0	0	0	0	0	0	0	0	0	0	0	0	0	0	0	0	0	0	0	0	0	0	0	0	0	0	0	0	0	0	0	0	0	0	0
hsa-miR-4720-3p	0	0	0	0	0	0	0	0	0	0	0	0	0	0	0	0	0	0	0	0	0	0	0	0	0	0	0	0	0	0	0	0	0	0	0	0	0	0	0	0	0	0	0	0	0	0	0	0	0
hsa-miR-4720-5p	0	0	0	0	0	0	0	0	0	0	0	0	0	0	0	0	0	0	0	0	0	0	0	0	0	0	0	0	0	0	0	0	0	0	0	0	0	0	0	0	0	0	0	0	0	0	0	0	0
hsa-miR-4721	0	0	0	0	0	0	0	0	0	0	0	0	0	0	0	0	0	0	0	0	0	0	0	0	0	0	0	0	0	0	0	0	0	0	0	0	0	0	0	0	0	0	0	0	0	0	0	0	0
hsa-miR-4722-3p	0	0	0	0	0	0	0	0	0	0	0	0	0	0	0	0	0	0	0	0	0	0	0	0	0	0	0	0	0	0	0	0	0	0	0	0	0	0	0	0	0	0	0	0	0	0	0	0	0
hsa-miR-4722-5p	0	0	0	0	0	0	0	0	0	0	0	0	0	0	0	0	0	0	0	0	0	0	0	0	0	0	0	0	0	0	0	0	0	0	0	0	0	0	0	0	0	0	0	0	0	0	0	0	0
hsa-miR-4723-3p	0	0	0	0	0	0	0	0	0	0	0	0	0	0	0	0	0	0	0	0	0	0	0	0	0	0	0	0	0	0	0	0	0	0	0	0	0	0	0	0	0	0	0	0	0	0	0	0	0
hsa-miR-4723-5p	0	0	0	0	0	0	0	0	0	0	0	0	0	0	0	0	0	0	0	0	0	0	0	0	0	0	0	0	0	0	0	0	0	0	0	0	0	0	0	0	0	0	0	0	0	0	0	0	0
hsa-miR-4724-3p	0	0	0	0	0	0	0	0	0	0	0	0	0	0	0	0	0	0	0	0	0	0	0	0	0	0	0	0	0	0	0	0	0	0	0	0	0	0	0	0	0	0	0	0	0	0	0	0	0
hsa-miR-4724-5p	0	0	0	1	0	0	0	0	0	0	0	0	0	0	0	0	0	1	0	0	0	0	0	2	1	0	0	0	0	1	0	0	0	0	0	0	0	0	0	0	0	0	0	0	0	0	0	0	0
hsa-miR-4725-3p	0	0	0	0	0	0	0	0	0	0	0	0	0	0	0	0	0	0	0	0	0	0	0	0	0	0	0	0	0	0	0	0	0	0	0	0	0	0	0	0	0	0	0	0	0	0	0	0	0
hsa-miR-4725-5p	0	0	0	0	0	0	0	0	0	0	0	0	0	0	0	0	0	0	0	0	0	0	0	0	0	0	0	0	0	0	0	0	0	0	0	0	0	0	0	0	0	0	0	0	0	0	0	0	0
hsa-miR-4726-3p	0	0	0	0	0	0	0	0	0	0	0	0	0	0	0	0	0	0	0	0	0	0	0	0	0	0	0	0	0	0	0	0	0	0	0	0	0	0	0	0	0	0	0	0	0	0	0	0	0
hsa-miR-4726-5p	0	0	0	0	0	0	0	0	0	0	0	0	0	0	0	0	0	0	0	0	0	0	0	0	0	0	0	0	0	0	0	0	0	0	0	0	0	0	0	0	0	0	0	0	0	0	0	0	1
hsa-miR-4727-3p	0	0	0	0	0	0	0	0	0	0	0	0	0	0	0	0	0	0	1	1	0	0	1	1	0	0	0	0	0	2	0	0	0	0	0	0	0	1	0	0	0	0	0	0	0	1	0	0	0
hsa-miR-4727-5p	0	0	0	0	0	0	0	0	0	0	0	0	0	0	0	0	0	0	0	0	0	0	0	0	0	0	0	0	0	0	0	0	0	0	0	0	0	0	0	0	0	0	0	0	0	0	0	0	0
hsa-miR-4728-3p	0	0	0	0	0	0	0	0	0	0	0	0	0	0	0	0	0	0	0	0	0	0	0	0	0	0	0	0	0	0	0	0	0	0	0	0	0	0	0	0	0	0	0	0	0	0	0	0	0
hsa-miR-4728-5p	0	0	0	0	0	0	0	0	0	0	0	0	0	0	0	0	0	0	0	0	0	0	0	0	0	0	0	0	0	0	0	0	0	0	0	0	0	0	0	0	0	0	0	0	0	0	0	0	0
hsa-miR-4729	0	0	0	0	0	0	0	0	0	0	0	0	0	0	0	0	0	0	0	1	0	0	0	0	0	0	0	0	0	0	0	0	0	0	0	0	0	0	0	0	0	0	0	0	0	0	0	0	0
hsa-miR-4730	0	0	0	0	0	0	0	0	0	0	0	0	0	0	0	0	0	0	0	0	0	0	0	0	0	0	0	0	0	0	0	0	0	0	0	0	0	0	0	0	0	0	0	0	0	0	0	0	0
hsa-miR-4731-3p	0	0	0	0	0	0	0	0	0	0	0	0	0	0	0	0	0	0	0	0	0	0	0	0	0	0	0	0	0	0	0	0	0	0	0	0	0	0	0	0	0	0	0	0	0	0	0	0	0
hsa-miR-4731-5p	0	0	0	0	1	0	0	0	0	0	0	0	0	0	0	0	0	0	0	0	0	0	0	0	0	0	0	0	0	0	0	0	0	0	0	0	0	0	0	0	0	0	0	0	0	0	0	0	0
hsa-miR-4732-3p	3	29	11	2	5	9	23	6	2	6	10	2	6	41	10	8	85	5	1	10	0	6	5	3	3	4	9	29	52	1	8	5	0	28	4	1	14	16	2	13	10	1	2	19	2	24	26	2	6
hsa-miR-4732-5p	27	25	41	44	13	8	64	61	11	13	20	3	36	186	12	30	580	7	15	186	13	38	57	10	18	18	55	91	122	15	35	3	19	202	79	32	49	73	10	136	51	37	18	56	6	28	133	55	23
hsa-miR-4733-3p	0	0	0	0	0	0	0	0	0	0	0	0	0	0	0	0	0	0	0	0	0	0	0	0	0	0	0	0	0	0	0	0	0	0	0	0	0	0	0	0	0	0	0	0	0	0	0	0	0
hsa-miR-4733-5p	0	0	0	0	0	0	0	0	0	0	0	0	0	0	0	0	0	0	0	0	0	0	0	0	0	0	0	0	0	0	0	0	0	0	0	0	0	0	0	0	0	0	0	0	0	0	0	0	0
hsa-miR-4734	0	0	0	0	0	0	0	0	0	0	0	0	0	0	0	0	0	0	0	0	0	0	0	0	0	0	0	0	0	0	0	0	0	0	0	0	0	0	0	0	0	0	0	0	0	0	0	0	0
hsa-miR-4735-3p	0	0	0	0	0	0	0	0	0	0	0	0	0	0	0	0	0	0	0	0	0	0	0	0	0	0	0	0	0	0	0	0	0	0	0	0	0	0	0	0	0	0	0	0	0	0	0	0	0
hsa-miR-4735-5p	0	0	0	0	0	0	0	0	0	0	0	0	0	0	0	0	0	0	0	0	0	0	0	0	0	0	0	0	0	0	0	0	0	0	0	0	0	0	0	0	0	0	0	0	0	0	0	0	0
hsa-miR-4736	0	0	0	0	0	0	0	0	0	0	0	0	0	0	0	0	0	0	0	0	0	0	0	0	0	0	0	0	0	0	0	0	0	0	0	0	0	0	0	0	0	0	0	0	0	0	0	0	0
hsa-miR-4737	0	0	0	0	0	0	0	0	0	0	0	0	0	0	0	0	0	0	0	0	0	0	0	0	0	0	0	0	0	0	0	0	0	0	0	0	0	0	0	0	0	0	0	0	0	0	0	0	0
hsa-miR-4738-3p	1	4	4	0	1	1	2	2	1	2	1	1	2	3	2	1	2	5	2	3	2	0	0	2	2	0	1	0	2	2	1	1	1	2	5	2	0	2	0	2	2	0	0	2	0	1	2	2	4
hsa-miR-4738-5p	0	0	0	0	0	0	0	0	0	0	0	0	0	0	0	0	0	0	0	0	0	0	0	0	0	0	0	0	0	0	0	0	0	0	0	0	0	0	0	0	0	0	0	0	0	0	0	0	0
hsa-miR-4739	0	0	0	0	0	0	0	0	0	0	0	0	0	0	0	0	0	0	0	0	0	0	0	0	0	0	0	0	0	0	0	0	0	0	0	0	0	0	0	0	0	0	0	0	0	0	0	0	0
hsa-miR-4740-3p	0	0	0	0	0	0	0	0	0	0	0	0	0	0	0	0	0	0	0	0	0	0	0	0	0	0	0	0	0	0	0	0	0	0	0	0	0	0	0	0	0	0	0	0	0	0	0	0	0
hsa-miR-4740-5p	0	0	0	0	0	0	0	0	0	0	0	0	0	0	0	0	0	0	0	0	0	0	0	0	0	0	0	0	0	0	0	0	0	0	0	0	0	0	0	0	0	0	0	0	0	0	0	0	0
hsa-miR-4741	0	0	1	0	0	0	0	1	0	0	0	0	0	2	0	0	0	0	0	2	0	0	0	0	0	1	0	0	0	0	0	1	0	0	0	0	0	0	0	0	0	0	0	0	0	2	0	1	0
hsa-miR-4742-3p	0	2	1	0	0	1	1	0	0	0	1	1	0	1	2	0	8	0	0	4	2	2	0	1	0	0	1	4	3	0	1	0	0	2	1	0	0	3	0	0	1	0	2	0	0	1	3	0	1
hsa-miR-4742-5p	0	0	0	0	0	0	0	0	0	0	1	0	0	0	0	0	0	1	0	1	0	0	0	0	0	0	0	1	0	0	0	0	0	0	1	0	2	0	0	0	1	0	0	0	1	0	0	0	0
hsa-miR-4743-3p	0	0	0	0	0	0	0	0	0	0	0	0	0	0	0	0	0	0	0	0	0	0	0	0	0	0	0	0	0	0	0	0	0	0	0	0	0	0	0	0	0	0	0	0	0	0	0	0	0
hsa-miR-4743-5p	0	0	1	0	0	0	0	0	0	0	0	0	0	1	0	0	0	0	0	0	4	0	0	0	0	0	0	0	0	0	0	0	0	0	0	0	0	0	0	0	0	0	0	0	0	1	0	0	0
hsa-miR-4744	0	0	0	0	0	0	0	0	0	0	0	0	0	0	0	0	0	0	0	0	0	0	0	0	0	0	0	0	0	0	0	0	0	0	0	0	0	0	0	0	0	0	0	0	0	0	0	0	0
hsa-miR-4745-3p	0	0	0	0	0	0	0	0	0	0	0	0	0	0	0	0	0	0	0	0	0	0	0	0	0	0	0	0	0	0	0	0	0	0	0	0	0	0	0	0	0	0	0	0	0	0	0	0	0
hsa-miR-4745-5p	0	0	0	0	0	0	0	1	0	0	0	0	0	1	0	2	3	0	0	1	0	0	0	0	0	0	0	0	0	0	0	0	0	0	0	0	1	0	0	0	0	0	0	0	0	0	0	0	0
hsa-miR-4746-3p	0	0	0	0	0	0	0	0	0	0	0	0	0	0	0	0	0	0	0	0	0	0	0	0	0	0	0	0	0	0	0	0	0	0	0	0	0	0	0	0	0	0	0	0	0	0	0	0	0
hsa-miR-4746-5p	4	6	6	2	4	7	5	4	3	3	7	2	1	6	2	7	11	1	4	7	1	5	4	0	6	2	3	7	11	1	3	1	2	5	3	3	3	11	2	2	4	3	4	2	2	3	7	1	1
hsa-miR-4747-3p	0	0	1	0	0	0	0	0	0	0	0	0	0	0	0	0	0	0	0	0	0	0	0	0	0	0	0	0	0	0	0	0	0	0	0	0	0	0	0	0	0	0	0	0	0	0	0	0	0
hsa-miR-4747-5p	0	0	0	0	0	0	1	0	0	0	0	0	0	1	0	0	1	0	0	0	0	0	0	0	0	0	0	0	1	0	0	0	0	0	0	0	0	0	0	0	0	0	0	0	0	0	0	0	0
hsa-miR-4748	0	0	0	0	0	0	0	0	0	0	0	0	0	0	0	0	0	0	0	0	0	0	0	0	0	0	0	0	0	0	0	0	0	0	0	0	0	0	0	0	0	0	0	0	0	0	0	0	0
hsa-miR-4749-3p	0	0	0	0	0	0	0	0	0	0	0	0	0	0	0	0	0	0	0	0	0	0	0	0	0	0	0	0	0	0	0	0	0	0	0	0	0	0	0	0	0	0	0	0	0	0	0	0	0
hsa-miR-4749-5p	0	0	0	0	0	0	0	0	0	0	0	0	0	0	0	0	0	0	0	0	0	0	0	0	0	0	0	0	0	0	0	0	0	0	0	0	0	0	0	0	0	0	0	0	0	0	0	0	0
hsa-miR-4750-3p	0	0	0	0	0	0	0	0	0	0	0	0	0	0	0	0	0	0	0	0	0	0	0	0	0	0	0	0	0	0	0	0	0	0	0	0	0	0	0	0	0	0	0	0	0	0	0	0	0
hsa-miR-4750-5p	0	1	0	0	0	0	1	2	0	2	2	0	0	0	1	0	2	0	1	2	0	0	3	2	0	0	0	0	0	2	0	0	0	2	0	1	0	0	0	0	1	0	1	0	1	0	0	0	2
hsa-miR-4751	0	0	0	0	0	0	0	0	0	0	0	0	0	0	0	0	0	0	0	0	0	0	0	0	0	0	0	0	0	0	0	0	0	0	0	0	0	0	0	0	0	0	0	0	0	0	0	0	0
hsa-miR-4752	0	0	0	0	0	0	0	0	0	0	0	0	0	0	0	0	0	0	0	0	0	0	0	0	0	0	0	0	0	0	0	0	0	0	0	0	0	0	0	0	0	0	0	0	0	0	0	0	0
hsa-miR-4753-3p	0	0	0	0	0	0	0	0	0	0	0	0	0	0	0	0	0	0	0	0	0	0	0	0	0	0	0	0	0	0	0	0	0	0	0	0	0	0	0	0	0	0	0	0	0	0	0	0	0
hsa-miR-4753-5p	0	0	2	1	0	1	0	0	0	1	0	0	0	1	0	0	1	0	0	0	3	0	0	0	0	0	0	0	0	0	0	0	0	0	0	0	0	0	0	0	0	0	0	0	0	0	0	0	0
hsa-miR-4754	0	0	0	0	0	0	0	0	0	0	0	0	0	0	0	0	0	0	0	0	0	0	0	0	0	0	0	0	0	0	0	0	0	0	0	0	0	0	0	0	0	0	0	0	0	0	0	0	0
hsa-miR-4755-3p	0	0	4	0	0	0	2	3	1	1	1	0	2	0	1	1	1	0	1	0	2	0	1	1	3	1	1	0	0	3	1	3	1	0	2	0	0	0	2	1	1	1	0	0	0	0	2	1	1
hsa-miR-4755-5p	0	3	0	0	3	1	1	6	0	0	1	3	2	2	3	2	13	1	0	6	1	0	1	2	1	0	1	2	3	0	1	0	0	2	1	0	3	3	0	1	1	0	0	2	0	0	2	0	1
hsa-miR-4756-3p	0	0	0	0	0	0	0	0	0	0	0	0	0	0	0	0	0	0	0	0	0	0	0	0	0	0	0	0	0	0	0	0	0	0	0	0	0	0	0	0	0	0	0	0	0	0	0	0	0
hsa-miR-4756-5p	0	0	0	0	0	0	0	0	0	0	0	0	0	0	0	0	0	0	0	0	0	0	0	0	0	0	0	0	0	0	0	0	0	0	0	0	0	0	0	0	0	0	0	0	0	0	0	0	0
hsa-miR-4757-3p	0	0	0	0	0	0	0	0	0	0	0	0	0	0	0	0	0	0	0	0	0	0	0	0	0	0	0	0	0	0	0	0	0	0	0	0	0	0	0	0	0	0	0	0	0	0	0	0	0
hsa-miR-4757-5p	0	0	0	0	0	0	0	0	0	0	0	0	0	0	0	0	0	0	0	0	0	0	0	0	0	0	0	0	0	0	0	0	0	0	0	0	0	0	0	0	0	0	0	0	0	0	0	0	0
hsa-miR-4758-3p	0	0	0	0	0	0	0	0	0	0	0	0	0	0	0	0	0	0	0	0	0	0	0	0	0	0	0	0	0	0	0	0	0	0	0	0	0	0	0	0	0	0	0	0	0	0	0	0	0
hsa-miR-4758-5p	0	0	0	0	0	0	0	0	0	0	0	0	0	0	0	0	0	0	0	0	0	0	0	0	0	0	0	0	0	0	0	0	0	0	0	0	0	0	0	0	0	0	0	0	0	0	0	0	0
hsa-miR-4759	0	0	0	0	0	0	0	0	0	0	0	0	0	0	0	0	0	0	0	0	0	0	0	0	0	0	0	0	0	0	0	0	0	0	0	0	0	0	0	0	0	0	0	0	0	0	0	0	0
hsa-miR-4760-3p	0	0	0	0	0	0	0	0	0	0	0	0	0	0	0	0	0	0	0	0	0	0	0	0	0	0	0	0	0	0	0	0	0	0	0	0	0	0	0	0	0	0	0	0	0	0	0	0	0
hsa-miR-4760-5p	0	0	0	0	0	0	0	0	0	0	0	0	0	0	0	0	0	0	0	0	0	0	0	0	0	0	0	0	0	0	0	0	0	0	0	0	0	0	0	0	0	0	0	0	0	0	0	0	0
hsa-miR-4761-3p	0	0	0	0	0	0	0	0	0	0	0	0	0	0	0	0	0	0	0	0	0	0	0	0	0	0	0	0	0	0	0	0	0	0	0	0	0	0	0	0	0	0	0	0	0	0	0	0	0
hsa-miR-4761-5p	0	0	0	0	0	0	0	0	0	0	0	0	0	0	0	0	0	0	0	0	0	0	0	0	0	0	0	0	0	0	0	0	0	0	0	0	0	0	0	0	0	0	0	0	0	0	0	0	0
hsa-miR-4762-3p	0	0	0	0	0	0	0	0	0	0	0	0	0	1	1	0	0	0	0	0	0	0	0	1	0	0	0	1	1	0	0	0	0	0	0	3	0	0	0	0	0	0	0	0	0	1	1	0	0
hsa-miR-4762-5p	0	0	0	0	0	0	0	0	0	0	0	0	0	0	0	0	0	0	0	0	0	0	0	0	0	0	0	0	0	0	0	0	0	0	0	0	0	0	0	0	0	0	0	0	0	0	0	0	0
hsa-miR-4763-3p	0	0	0	0	0	0	0	0	0	0	0	0	0	0	0	0	0	0	0	0	0	0	0	0	0	0	0	0	0	0	0	0	0	0	0	0	0	0	0	0	0	0	0	0	0	0	0	0	0
hsa-miR-4763-5p	0	0	0	0	0	0	0	0	0	0	0	0	0	0	0	0	0	0	0	0	0	0	0	0	0	0	0	0	0	0	0	0	0	0	0	0	0	0	0	0	0	0	0	0	0	0	0	0	0
hsa-miR-4764-3p	0	0	0	0	0	0	0	0	0	0	0	0	0	0	0	0	0	0	0	0	0	0	0	0	0	0	0	0	0	0	0	0	0	0	0	0	0	0	0	0	0	0	0	0	0	0	0	0	0
hsa-miR-4764-5p	0	0	0	0	0	0	0	0	0	0	0	0	0	0	0	0	0	0	0	0	0	0	0	0	0	0	0	0	0	0	0	0	0	0	0	0	0	0	0	0	0	0	0	0	0	0	0	0	0
hsa-miR-4765	0	0	0	0	0	0	0	0	0	0	0	0	0	0	0	0	0	0	0	0	1	0	0	0	0	0	0	0	0	0	0	0	0	0	0	0	0	0	0	0	0	0	0	0	0	0	0	0	0
hsa-miR-4766-3p	0	0	0	0	0	0	0	0	0	0	0	0	0	0	0	0	0	0	0	0	0	0	0	0	0	0	0	0	0	0	0	0	0	0	0	0	0	0	0	0	0	0	0	0	0	0	0	0	0
hsa-miR-4766-5p	0	0	0	0	0	0	0	0	0	0	0	0	0	0	0	0	0	0	0	0	0	0	0	0	0	0	0	0	0	0	0	0	0	0	0	0	0	0	0	0	0	0	0	0	0	0	0	0	0
hsa-miR-4767	0	0	0	0	0	0	0	0	0	0	0	0	0	0	0	0	0	0	0	0	0	0	0	0	0	0	0	0	0	0	0	0	0	0	0	0	0	0	0	0	0	0	0	0	0	0	0	0	0
hsa-miR-4768-3p	0	0	0	0	0	0	0	0	0	0	0	0	0	0	0	0	0	0	0	0	0	0	0	0	0	0	0	0	0	0	0	0	0	0	0	0	0	0	0	0	0	0	0	0	0	0	0	0	0
hsa-miR-4768-5p	0	0	0	0	0	0	0	0	0	0	0	0	0	0	0	0	0	0	0	0	0	0	0	0	0	0	0	0	0	0	0	0	0	0	0	0	0	0	0	0	0	0	0	0	0	0	0	0	0
hsa-miR-4769-3p	0	0	0	0	0	0	0	0	0	0	0	0	0	0	0	0	0	0	0	0	0	0	0	0	0	0	0	0	0	0	0	0	0	0	0	0	0	0	0	0	0	0	0	0	0	0	0	0	0
hsa-miR-4769-5p	0	0	0	0	0	0	0	0	0	0	0	0	0	0	0	0	0	0	0	0	0	0	0	0	0	0	0	0	0	0	0	0	0	0	0	0	0	0	0	0	0	0	0	0	0	0	0	0	0
hsa-miR-4770	0	0	0	0	0	0	0	0	0	0	0	0	0	0	0	0	0	0	0	0	0	0	0	0	0	0	0	0	0	0	0	0	0	0	0	0	0	0	0	0	0	0	0	0	0	0	0	0	0
hsa-miR-4771	0	0	0	0	0	0	0	0	0	0	0	0	0	0	0	0	0	0	0	0	0	0	0	0	0	0	0	0	0	0	0	0	0	0	0	0	0	0	0	0	0	0	0	0	0	0	0	0	0
hsa-miR-4772-3p	0	0	0	0	0	0	0	0	1	0	0	0	2	0	2	0	0	0	1	0	0	0	0	2	0	0	0	0	0	0	0	1	0	0	0	1	0	0	0	0	0	2	0	0	0	2	0	0	0
hsa-miR-4772-5p	0	1	1	0	0	0	0	0	1	0	0	0	3	0	1	0	0	0	3	0	0	0	0	1	0	0	0	0	0	1	0	0	1	0	1	0	1	0	0	0	0	0	0	0	0	1	0	0	0
hsa-miR-4773	0	0	0	1	0	1	0	4	0	0	0	1	3	0	0	0	0	1	0	0	2	0	0	1	1	0	0	0	0	1	0	0	3	1	0	2	0	0	1	0	2	1	0	0	0	0	0	0	0
hsa-miR-4774-3p	0	0	0	0	0	0	0	0	0	0	0	0	0	0	0	0	0	0	0	0	0	0	0	0	0	0	0	0	0	0	0	0	0	0	0	0	0	0	0	0	0	0	0	0	0	0	0	0	0
hsa-miR-4774-5p	0	0	0	0	0	0	0	0	0	0	0	0	0	0	0	0	0	0	0	0	0	0	0	0	0	0	0	0	0	0	0	0	0	0	0	0	0	0	0	0	0	0	0	0	0	0	0	0	0
hsa-miR-4775	0	0	0	0	0	0	0	0	0	0	0	0	0	0	0	0	0	0	0	1	0	0	0	0	0	0	0	0	0	0	0	0	0	0	0	0	0	0	0	0	0	0	0	0	0	0	0	0	0
hsa-miR-4776-3p	0	0	0	0	0	0	0	0	0	0	0	0	0	0	0	0	0	0	0	0	0	0	0	0	0	0	0	0	0	0	0	0	0	0	0	0	0	0	0	0	0	0	0	0	0	0	0	0	0
hsa-miR-4776-5p	0	0	0	0	0	0	0	0	0	0	0	0	0	0	0	0	0	0	0	0	0	0	0	0	0	0	0	0	0	0	0	0	0	0	0	0	0	0	0	0	0	0	0	0	0	0	0	0	0
hsa-miR-4777-3p	0	0	0	0	0	0	0	0	0	1	0	0	0	0	0	0	0	0	0	0	0	0	0	1	0	0	0	0	0	0	0	0	0	0	0	0	0	0	0	0	0	0	0	0	0	0	0	0	0
hsa-miR-4777-5p	0	0	0	0	0	0	0	0	0	0	0	0	0	0	0	0	0	0	0	0	0	0	0	0	0	0	0	0	0	0	0	0	0	0	0	0	0	0	0	0	0	0	0	0	0	0	0	0	0
hsa-miR-4778-3p	0	0	0	0	0	0	0	0	0	0	0	0	0	0	0	0	0	0	0	0	0	0	0	0	0	0	0	0	0	0	0	0	0	0	0	0	0	0	0	0	0	0	0	0	0	0	0	0	0
hsa-miR-4778-5p	0	0	0	0	0	0	0	0	0	0	0	0	0	0	0	0	0	0	0	0	0	0	0	0	0	0	0	0	0	0	0	0	0	0	0	0	0	0	0	0	0	0	0	0	0	0	0	0	0
hsa-miR-4779	0	0	0	0	0	0	0	0	0	0	0	0	0	0	0	0	1	0	1	0	0	0	0	0	0	0	0	0	0	0	0	0	0	0	0	0	0	0	0	0	0	0	0	0	0	0	0	0	0
hsa-miR-4780	0	0	0	0	0	0	0	0	0	0	0	0	0	0	0	0	0	0	0	0	0	0	0	0	0	0	0	0	0	0	0	0	0	0	0	0	0	0	0	0	0	0	0	0	0	0	0	0	0
hsa-miR-4781-3p	0	0	1	0	0	0	0	0	0	0	0	1	0	0	0	1	0	0	0	0	0	0	0	0	0	0	0	0	0	0	0	0	0	0	0	0	0	0	0	0	0	0	0	0	0	0	0	0	0
hsa-miR-4781-5p	0	0	0	0	0	0	0	0	0	0	0	0	0	0	0	0	0	0	0	0	0	0	0	0	0	0	0	0	0	0	0	0	0	0	0	0	0	0	0	0	0	0	0	0	0	0	0	0	0
hsa-miR-4782-3p	0	0	0	0	0	0	0	0	0	0	0	0	0	0	0	0	0	0	0	0	0	0	0	0	0	0	0	0	0	0	0	0	0	0	0	0	0	0	0	0	0	0	0	0	0	0	0	0	0
hsa-miR-4782-5p	0	0	0	0	0	0	0	0	0	0	0	0	0	0	0	0	0	0	0	0	0	0	0	0	0	0	0	0	0	0	0	0	0	0	0	0	0	0	0	0	0	0	0	0	0	0	0	0	0
hsa-miR-4783-3p	0	0	0	0	0	0	0	0	0	0	0	0	0	0	0	0	0	0	0	0	0	0	0	0	0	0	0	0	0	0	0	0	0	0	0	0	0	0	0	0	0	0	0	0	0	0	0	0	0
hsa-miR-4783-5p	0	0	0	0	0	0	0	0	0	0	0	0	0	0	0	0	0	0	0	0	0	0	0	0	0	0	0	0	0	0	0	0	0	0	0	0	0	0	0	0	0	0	0	0	0	0	0	0	0
hsa-miR-4784	0	0	0	0	0	0	0	0	0	0	0	0	0	0	0	0	0	0	0	0	0	0	0	0	0	0	0	1	0	0	0	0	0	0	0	0	0	0	0	0	0	4	0	0	0	0	0	0	0
hsa-miR-4785	0	0	0	0	0	0	0	0	0	0	0	0	0	0	0	0	0	0	0	0	0	0	0	0	0	0	0	0	0	0	0	0	0	0	0	0	0	0	0	0	0	0	0	0	0	0	0	0	0
hsa-miR-4786-3p	0	0	0	0	0	0	0	0	0	0	0	0	0	0	0	0	0	0	0	0	0	0	0	0	0	0	0	0	0	0	0	0	0	0	0	0	0	0	0	0	0	0	0	0	0	0	0	0	0
hsa-miR-4786-5p	0	0	0	0	0	0	0	0	0	0	0	0	0	0	0	0	0	0	0	0	0	0	0	0	0	0	0	0	0	0	0	0	0	0	0	0	0	0	0	0	0	0	0	0	0	0	0	0	0
hsa-miR-4787-3p	0	0	0	0	0	0	0	0	0	0	0	0	0	0	0	0	0	0	0	0	0	0	0	0	0	0	0	0	0	0	0	0	0	0	0	0	0	0	0	0	0	0	0	0	0	0	0	0	0
hsa-miR-4787-5p	0	0	0	0	0	0	0	0	0	0	0	0	0	0	0	0	0	0	0	0	0	0	0	0	0	0	0	0	0	0	0	0	0	0	0	0	0	0	0	0	0	0	0	0	0	0	0	0	0
hsa-miR-4788	0	0	0	0	0	0	0	1	0	0	0	0	0	0	0	0	0	0	0	0	0	0	0	0	0	0	0	0	0	0	0	0	0	0	0	0	0	0	0	0	0	0	0	0	0	0	0	0	0
hsa-miR-4789-3p	0	0	0	0	0	0	0	0	0	0	0	0	0	0	0	0	0	0	0	0	0	0	0	0	0	0	0	0	0	0	0	0	0	0	0	0	0	0	0	0	0	0	0	0	0	0	0	0	0
hsa-miR-4789-5p	0	0	0	0	0	0	0	0	0	0	0	0	0	0	0	0	0	0	0	0	0	0	0	0	0	0	0	0	0	0	0	0	0	0	0	0	0	0	0	0	0	0	0	0	0	0	0	0	0
hsa-miR-4790-3p	0	0	0	0	0	0	0	0	0	0	0	0	0	0	0	0	0	0	0	0	0	0	0	0	0	0	0	0	0	0	0	0	0	0	0	0	0	0	0	0	0	0	0	0	0	0	0	0	0
hsa-miR-4790-5p	0	0	0	0	0	0	0	0	0	0	0	0	0	0	0	0	0	0	0	0	0	0	0	0	0	0	0	0	0	0	0	0	0	0	0	0	0	0	0	0	0	0	0	0	0	0	0	0	0
hsa-miR-4791	0	0	0	0	0	0	0	0	0	0	0	0	0	0	0	0	0	0	0	0	0	0	0	0	1	0	0	0	0	0	0	0	0	0	0	0	0	0	0	0	0	0	0	0	0	0	0	0	0
hsa-miR-4792	0	0	0	0	0	0	0	0	0	0	0	0	0	0	0	0	0	0	0	0	0	0	0	0	0	0	0	0	0	0	0	0	0	0	0	0	0	0	0	0	0	0	0	0	0	0	0	0	0
hsa-miR-4793-3p	0	0	0	0	0	0	0	0	0	0	0	0	0	0	0	0	0	0	0	0	0	0	0	0	0	0	0	0	0	0	0	0	0	0	0	0	0	0	0	0	0	0	0	0	0	0	0	0	0
hsa-miR-4793-5p	0	0	0	0	0	0	0	0	0	0	0	0	0	0	0	0	0	0	0	0	0	0	0	0	0	0	0	0	0	0	0	0	0	0	0	0	0	0	0	0	0	0	0	0	0	0	0	0	0
hsa-miR-4794	0	0	1	0	0	0	0	0	0	0	0	0	0	0	0	0	0	0	0	0	0	0	0	0	0	0	0	0	0	0	0	0	0	0	0	0	0	0	0	0	0	0	0	0	0	0	0	0	0
hsa-miR-4795-3p	0	0	0	0	0	0	0	0	0	0	0	0	0	0	0	0	0	0	0	0	0	0	0	0	0	0	0	0	0	0	0	0	0	0	0	0	0	0	0	0	0	0	0	0	0	0	0	0	0
hsa-miR-4795-5p	0	0	0	0	0	0	0	0	0	0	0	0	0	0	0	0	0	0	0	0	0	0	0	0	0	0	0	0	0	0	0	0	0	0	0	0	0	0	0	0	0	0	0	0	0	0	0	0	0
hsa-miR-4796-3p	1	0	0	0	0	0	0	0	0	0	0	0	0	0	0	0	0	0	0	0	0	0	0	0	0	0	0	0	0	0	0	0	0	0	0	0	0	0	0	0	0	0	0	0	0	0	0	0	0
hsa-miR-4796-5p	0	0	0	0	0	0	0	1	0	0	0	0	0	0	0	0	0	0	0	0	0	0	0	0	0	0	0	1	0	1	0	0	0	0	0	0	0	0	0	0	0	0	0	0	0	0	0	0	0
hsa-miR-4797-3p	0	0	0	0	0	0	0	0	0	0	0	0	0	0	0	0	1	0	0	1	0	0	0	0	0	0	0	0	0	0	0	0	0	0	0	0	0	0	0	0	0	0	0	0	0	0	0	0	0
hsa-miR-4797-5p	0	0	0	0	0	0	0	0	0	0	0	0	0	0	0	0	0	0	0	0	0	0	0	0	0	0	0	0	0	0	0	0	0	0	0	0	0	0	0	0	0	0	0	0	0	0	0	0	0
hsa-miR-4798-3p	0	0	0	0	0	0	0	0	0	0	0	0	0	0	0	0	0	0	0	0	0	0	0	0	0	0	0	0	0	0	0	0	0	0	0	0	0	0	0	0	0	0	0	0	0	0	0	0	0
hsa-miR-4798-5p	0	0	0	0	0	0	0	0	0	0	0	0	0	0	0	0	0	0	0	0	0	0	0	0	0	0	0	0	0	0	0	0	0	0	0	0	0	0	0	0	0	0	0	0	0	0	0	0	0
hsa-miR-4799-3p	0	0	0	0	0	0	0	0	0	0	0	0	0	0	0	0	0	0	0	0	0	0	0	0	0	0	0	0	0	0	0	0	0	0	0	0	0	0	0	0	0	0	0	0	0	0	0	0	0
hsa-miR-4799-5p	0	0	0	0	0	0	0	0	0	0	0	0	0	0	0	0	0	0	0	0	0	0	0	0	0	0	0	0	0	0	0	0	0	0	0	0	0	0	0	0	0	0	0	0	0	0	0	0	0
hsa-miR-4800-3p	0	0	0	0	0	0	0	0	0	0	0	0	0	0	0	0	0	0	0	0	0	0	0	0	0	0	0	0	0	0	0	0	0	0	0	0	0	0	0	0	0	0	0	0	0	0	0	0	0
hsa-miR-4800-5p	0	0	0	0	0	0	0	1	0	0	0	0	0	0	0	0	0	0	0	1	0	0	0	0	0	0	0	0	0	0	0	0	0	0	0	0	0	0	0	0	0	0	0	0	0	0	0	0	0
hsa-miR-4801	0	0	0	0	0	0	0	0	0	0	0	0	0	0	0	0	0	0	0	0	0	0	0	0	0	0	0	0	0	0	0	0	0	0	0	0	0	0	0	0	0	0	0	0	0	0	0	0	0
hsa-miR-4802-3p	0	0	0	0	0	0	0	0	0	0	0	0	0	0	0	0	0	0	0	0	0	0	0	0	0	0	0	0	0	0	0	0	0	0	0	0	0	0	0	0	0	0	0	0	0	0	0	0	0
hsa-miR-4802-5p	0	0	0	0	0	0	0	0	0	0	0	0	0	0	0	0	0	0	0	0	0	0	0	0	0	0	0	0	0	0	0	0	0	0	0	0	0	0	0	0	0	0	0	0	0	0	0	0	0
hsa-miR-4803	0	0	0	0	0	0	0	0	0	0	0	0	0	0	0	0	0	0	0	0	0	0	0	0	0	0	0	0	0	0	0	0	0	0	0	0	0	0	0	0	0	0	0	0	0	0	0	0	0
hsa-miR-4804-3p	0	0	0	0	0	0	0	0	0	0	0	0	0	0	0	0	0	0	0	0	0	0	0	0	0	0	0	0	0	0	0	0	0	0	0	0	0	0	0	0	0	0	0	0	0	0	0	0	0
hsa-miR-4804-5p	0	0	0	0	0	0	0	0	0	0	0	0	0	0	0	0	0	0	0	0	0	0	0	0	0	0	0	1	0	0	0	0	0	0	0	0	0	0	0	0	0	0	0	0	0	0	0	0	0
hsa-miR-4999-3p	0	0	0	0	0	0	0	0	0	0	0	0	0	0	0	0	0	0	0	0	0	0	0	0	0	0	0	0	0	0	0	0	0	0	0	0	0	0	0	0	0	0	0	0	0	0	0	0	0
hsa-miR-4999-5p	0	0	0	0	0	0	0	0	0	0	1	0	0	0	0	1	0	0	0	0	0	0	0	0	0	0	0	0	0	0	0	0	0	0	0	0	0	0	0	0	0	0	0	0	0	0	0	0	0
hsa-miR-5000-3p	0	0	0	0	0	0	0	0	0	0	0	0	0	0	0	0	0	0	0	0	0	0	0	0	0	0	0	0	0	0	0	0	0	0	0	0	0	0	0	0	0	0	0	0	0	0	0	0	0
hsa-miR-5000-5p	0	0	0	0	0	0	0	0	0	0	0	0	0	0	0	0	0	0	0	0	0	0	0	0	0	0	0	0	0	0	0	0	0	0	0	0	0	0	0	0	0	0	0	0	0	0	0	0	0
hsa-miR-5001-3p	0	0	0	0	0	0	0	0	0	0	0	0	0	0	0	0	0	0	0	0	0	0	0	0	0	0	0	1	1	0	0	0	0	1	0	0	0	0	0	0	0	0	0	0	0	0	1	0	0
hsa-miR-5001-5p	0	0	0	0	0	0	0	0	0	1	0	0	0	0	0	0	1	0	0	0	0	0	0	0	0	0	0	1	0	0	0	0	0	0	0	0	0	0	0	0	0	0	0	0	0	0	0	0	0
hsa-miR-5002-3p	0	0	0	0	0	0	0	0	0	0	0	0	0	0	0	0	0	0	0	0	0	0	0	0	0	0	0	0	0	0	0	0	0	0	0	0	0	0	0	0	0	0	0	0	0	0	0	0	0
hsa-miR-5002-5p	0	0	0	0	0	0	0	0	0	0	0	0	0	0	0	0	0	0	0	0	0	0	0	0	0	0	0	0	0	0	0	0	0	0	0	0	0	0	0	0	0	0	0	0	0	0	0	0	0
hsa-miR-5003-3p	1	0	0	0	0	0	0	0	0	0	0	0	0	0	0	0	0	0	0	0	0	0	0	0	0	0	0	0	0	0	1	0	0	2	0	0	0	1	0	0	0	0	0	0	0	0	0	0	0
hsa-miR-5003-5p	0	0	0	0	0	0	0	0	0	0	0	0	0	0	0	0	0	0	0	0	0	0	0	0	0	0	0	0	0	0	0	0	0	0	0	0	0	0	0	0	0	0	0	0	0	0	0	0	0
hsa-miR-5004-3p	0	0	0	0	2	0	0	0	0	0	0	0	0	2	0	1	0	0	0	0	0	0	0	0	0	0	0	0	0	0	0	0	0	0	0	0	0	0	0	0	0	0	0	0	0	0	0	0	0
hsa-miR-5004-5p	0	0	0	0	0	0	0	0	0	0	0	0	0	0	0	0	0	0	0	0	0	0	0	0	0	0	0	0	0	0	0	0	0	0	0	0	0	0	0	0	0	0	0	0	0	0	0	0	0
hsa-miR-5006-3p	0	0	0	0	0	0	0	0	0	0	0	0	0	0	0	0	0	0	0	0	0	0	0	2	0	0	0	0	0	0	0	0	0	0	0	0	0	0	0	0	0	0	0	0	0	0	0	0	0
hsa-miR-5006-5p	0	0	0	0	0	0	0	0	0	0	0	0	0	0	0	0	0	0	0	0	0	0	0	0	0	0	0	0	0	0	0	0	0	0	0	0	0	0	0	0	0	0	0	0	0	0	0	0	0
hsa-miR-5007-3p	0	0	0	0	0	0	0	0	0	0	0	0	0	0	0	0	0	0	0	0	0	0	0	0	0	0	0	0	0	0	0	0	0	0	0	0	0	0	0	0	0	0	0	0	0	0	0	0	0
hsa-miR-5007-5p	0	0	0	0	0	0	0	0	0	0	0	0	0	0	0	0	0	0	0	0	0	0	0	0	0	0	0	0	0	0	0	0	0	0	0	0	0	0	0	0	0	0	0	0	0	0	0	0	0
hsa-miR-5008-3p	0	0	0	0	0	0	0	0	0	0	0	0	0	0	0	0	0	0	0	0	0	0	0	0	0	0	0	0	0	0	0	0	0	0	0	0	0	0	0	0	0	0	0	0	0	0	0	0	0
hsa-miR-5008-5p	0	0	0	0	0	0	0	0	0	0	0	0	0	0	0	0	0	0	0	0	0	0	0	0	0	0	0	0	0	0	0	0	0	0	0	0	0	0	0	0	0	0	0	0	0	0	0	0	0
hsa-miR-5009-3p	0	0	0	0	0	0	0	0	0	0	0	0	0	0	0	0	0	0	0	0	0	0	0	0	0	0	0	0	0	0	0	0	0	0	0	0	0	0	0	0	0	0	0	0	0	0	0	0	0
hsa-miR-5009-5p	2	1	0	1	0	0	1	0	2	1	0	0	0	0	2	0	2	0	0	2	2	0	1	1	0	0	0	3	3	1	0	0	0	1	0	0	1	3	0	0	0	0	0	0	0	0	1	0	0
hsa-miR-5010-3p	1	0	1	0	0	2	1	1	0	0	0	0	0	0	0	0	0	0	0	2	0	1	0	0	0	0	1	1	2	0	0	0	0	2	0	0	0	2	0	1	0	0	0	1	0	1	0	0	0
hsa-miR-5010-5p	0	0	1	1	0	1	2	0	0	2	0	1	0	3	0	1	23	0	1	3	0	1	1	1	1	2	1	2	9	1	2	0	1	8	1	1	3	1	0	3	3	2	1	2	0	0	3	0	2
hsa-miR-5011-3p	0	0	0	0	0	0	0	0	0	0	0	0	0	0	0	0	0	0	0	0	0	0	0	0	0	0	0	0	0	0	0	0	0	0	0	0	0	0	0	0	0	0	0	0	0	0	0	0	0
hsa-miR-5011-5p	0	0	0	0	0	0	0	0	0	0	0	0	0	0	0	0	0	0	0	0	0	0	0	0	0	0	0	0	0	0	0	0	0	0	0	0	0	0	0	0	0	0	0	0	0	0	0	0	0
hsa-miR-5047	0	0	0	0	0	0	0	0	0	0	0	0	0	0	0	0	0	0	0	0	0	0	0	0	0	0	0	0	0	0	0	0	0	0	0	0	0	0	0	0	0	0	0	0	0	0	0	0	0
hsa-miR-5087	0	0	0	0	0	0	0	0	0	0	0	0	0	0	0	0	0	0	0	0	0	0	0	0	0	0	0	0	0	0	0	0	0	0	0	0	0	0	0	0	0	0	0	0	0	0	0	0	0
hsa-miR-5088-3p	0	0	0	0	0	0	0	0	0	0	0	0	0	0	0	0	0	0	0	0	0	0	0	0	0	0	0	0	0	0	0	0	0	0	0	0	0	0	0	0	0	0	0	0	0	0	0	0	0
hsa-miR-5088-5p	0	0	0	0	0	0	0	0	0	0	0	0	0	0	0	0	0	0	0	0	0	0	0	0	0	0	0	0	0	0	0	0	0	0	0	0	0	0	0	0	0	0	0	0	0	0	0	0	0
hsa-miR-5089-3p	0	0	0	0	0	0	0	0	0	0	0	0	0	0	0	0	0	0	0	0	0	0	0	0	0	0	0	0	0	0	0	0	0	0	0	0	0	0	0	0	0	0	0	0	0	0	0	0	0
hsa-miR-5089-5p	0	0	0	0	0	0	0	0	0	0	0	0	0	0	0	0	0	0	0	0	0	0	0	0	0	0	0	0	0	0	0	0	0	0	0	0	0	0	0	0	0	0	0	0	0	0	0	0	0
hsa-miR-5090	0	0	0	0	0	0	0	0	0	0	0	0	0	0	0	0	0	0	0	0	0	0	0	0	0	0	0	0	0	0	0	0	0	1	0	0	0	0	0	0	0	0	0	0	0	0	0	0	0
hsa-miR-5091	0	0	0	0	0	0	0	0	0	0	0	0	0	0	0	0	0	0	0	0	0	0	0	0	0	0	0	0	0	0	0	0	0	0	0	0	0	0	0	0	0	0	0	0	0	0	0	0	0
hsa-miR-5092	0	0	0	0	0	0	0	0	0	0	0	0	0	0	0	0	0	0	0	0	0	0	0	0	0	0	0	0	0	0	0	0	0	0	0	0	0	0	0	0	0	0	0	0	0	0	0	0	0
hsa-miR-5093	0	0	0	0	0	0	0	0	0	0	0	0	0	0	0	0	0	0	0	0	0	0	0	0	0	0	0	0	0	0	0	0	0	0	0	0	0	0	0	0	0	0	0	0	0	0	0	0	0
hsa-miR-5094	0	0	0	0	0	0	0	0	0	0	0	0	0	0	0	0	0	0	0	0	0	0	0	0	0	0	0	0	0	0	0	0	0	0	0	0	0	0	0	0	0	0	0	0	0	0	0	0	0
hsa-miR-5095	0	0	0	0	0	0	0	0	0	0	0	0	0	0	0	0	0	0	0	0	0	0	0	0	0	0	0	0	0	0	0	0	0	0	0	0	0	0	0	0	0	0	0	0	0	0	0	0	0
hsa-miR-5096	0	0	0	0	0	0	0	0	0	0	0	0	0	0	0	0	0	0	0	0	0	0	0	0	0	0	0	0	0	0	0	0	0	0	0	0	0	0	0	0	0	0	0	0	0	0	0	0	0
hsa-miR-5100	0	0	0	0	0	0	0	0	0	0	0	0	0	0	0	0	0	0	0	0	0	0	0	0	0	0	0	0	0	0	0	0	0	0	0	0	0	0	0	0	0	0	0	0	0	0	0	0	0
hsa-miR-5186	0	0	0	0	0	0	0	0	0	0	0	0	0	0	0	0	0	0	0	0	0	0	0	0	0	0	0	0	0	0	0	0	0	0	0	0	0	0	0	0	0	0	0	0	0	0	0	0	0
hsa-miR-5187-3p	0	0	0	0	0	0	0	0	0	0	0	0	0	0	0	0	0	0	0	0	0	0	0	0	0	0	0	0	0	0	0	0	0	0	0	0	0	0	0	0	0	0	0	0	0	0	0	0	0
hsa-miR-5187-5p	0	0	0	0	1	0	0	1	0	1	0	0	0	0	0	0	1	0	1	0	1	1	0	1	0	0	0	2	0	1	0	0	1	0	0	2	2	0	0	1	0	1	1	0	0	0	0	0	1
hsa-miR-5188	0	0	0	0	0	0	0	0	0	0	0	0	0	0	0	0	0	0	0	0	0	0	0	0	0	0	0	0	0	0	0	0	0	0	0	1	0	0	0	0	0	0	0	0	0	0	0	0	0
hsa-miR-5189-3p	1	1	1	0	2	0	1	2	0	0	0	1	3	2	0	1	0	0	0	2	0	0	0	0	0	1	2	3	0	0	0	0	0	0	0	1	1	3	0	1	2	0	0	2	0	0	0	0	1
hsa-miR-5189-5p	3	1	8	0	2	0	6	5	2	4	1	0	0	3	0	1	4	1	0	4	0	0	5	1	1	3	3	5	4	2	3	1	3	4	1	4	4	5	0	3	3	2	1	4	1	1	2	0	0
hsa-miR-5190	0	0	0	0	0	0	0	0	0	0	0	0	0	0	0	0	0	0	0	0	0	0	0	0	0	0	0	0	0	0	0	0	0	0	0	0	0	0	0	0	0	0	0	0	0	0	0	0	0
hsa-miR-5191	0	0	0	0	0	0	0	0	0	0	0	0	0	0	0	0	0	0	0	0	0	0	0	0	0	0	0	0	0	0	0	0	0	0	0	0	0	0	0	0	0	0	0	0	0	0	0	0	0
hsa-miR-5192	0	0	0	0	0	0	0	0	0	0	0	0	0	0	0	0	0	0	0	0	0	0	0	0	0	0	0	0	0	0	0	0	0	0	0	0	0	0	0	0	0	0	0	0	0	0	0	0	0
hsa-miR-5193	0	0	0	0	0	0	0	0	0	0	0	0	0	0	0	0	0	1	0	0	0	0	0	0	0	0	0	0	0	0	0	0	0	0	0	0	0	0	0	0	0	0	0	0	0	0	0	0	0
hsa-miR-5194	0	0	0	0	0	0	0	0	0	0	0	0	0	0	0	0	0	0	0	0	0	0	0	0	0	0	0	0	0	0	0	0	0	0	0	0	0	0	0	0	0	0	0	0	0	0	0	0	0
hsa-miR-5195-3p	0	0	0	0	0	0	0	0	0	0	0	0	0	0	0	0	0	0	0	0	0	0	0	0	0	0	0	0	0	0	0	0	0	0	0	0	0	0	0	0	0	0	0	0	0	0	0	0	0
hsa-miR-5195-5p	0	0	0	0	0	0	0	0	0	0	0	0	0	0	0	0	0	0	0	0	0	0	0	0	0	0	0	0	0	0	0	0	0	0	0	0	0	0	0	0	0	0	0	0	0	0	0	0	0
hsa-miR-5196-3p	0	0	0	0	0	0	0	0	0	0	0	0	0	0	0	0	0	0	0	0	0	0	0	0	0	0	0	0	0	0	0	0	0	0	0	0	0	0	0	0	0	0	0	0	0	0	0	0	0
hsa-miR-5196-5p	0	0	0	0	0	0	0	0	0	0	0	0	0	0	0	0	0	0	0	0	0	0	0	0	0	0	0	0	0	0	0	0	0	0	0	0	0	0	0	0	0	0	0	0	0	0	0	0	0
hsa-miR-5197-3p	0	0	0	0	0	0	0	0	0	0	0	0	0	0	0	0	0	0	0	0	0	0	0	0	0	0	0	0	0	0	0	0	0	0	0	0	0	0	0	0	0	0	0	0	0	0	0	0	0
hsa-miR-5197-5p	0	0	0	0	0	0	0	0	0	0	0	0	0	0	0	0	0	0	0	0	0	0	0	0	0	0	0	0	0	0	0	0	0	0	0	0	0	0	0	0	0	0	0	0	0	0	0	0	0
hsa-miR-5571-3p	0	0	0	0	0	0	0	0	0	0	0	0	0	0	0	0	0	0	0	0	0	0	0	0	0	0	0	0	0	0	0	0	0	0	0	0	0	0	0	0	0	0	0	0	0	0	0	0	0
hsa-miR-5571-5p	0	0	0	0	0	0	0	0	0	0	0	0	0	0	0	0	0	0	0	0	0	0	0	0	0	0	0	0	0	0	0	0	0	0	0	0	0	0	0	0	0	0	0	0	0	0	0	0	0
hsa-miR-5572	0	0	0	0	0	0	0	0	0	0	0	0	0	0	0	0	0	0	0	0	0	0	0	0	0	0	0	0	0	0	0	0	0	0	0	0	0	0	0	0	0	0	0	0	0	0	0	0	0
hsa-miR-5579-3p	0	0	0	0	0	0	0	0	0	0	0	0	0	0	0	0	0	0	0	0	0	0	0	0	0	0	0	0	0	0	0	0	0	0	0	0	0	0	0	0	0	0	0	0	0	0	0	0	0
hsa-miR-5579-5p	0	0	0	0	0	0	0	0	0	0	0	0	0	0	0	0	0	0	0	0	0	0	0	0	0	0	0	0	0	0	0	0	0	0	0	0	0	0	0	0	0	0	0	0	0	0	0	0	0
hsa-miR-5580-3p	0	0	0	0	0	0	0	0	0	0	0	0	0	0	0	0	0	0	0	0	0	0	0	0	0	0	0	0	0	0	0	0	0	0	0	0	0	0	0	0	0	0	0	0	0	0	0	0	0
hsa-miR-5580-5p	0	0	0	0	0	0	0	0	0	0	0	0	0	0	0	0	0	0	0	0	0	0	0	0	0	0	0	0	0	0	0	0	0	0	0	0	0	0	0	0	0	0	0	0	0	0	0	0	0
hsa-miR-5581-3p	0	0	0	0	0	0	0	0	0	0	0	0	0	0	0	0	0	0	0	0	0	0	0	0	0	0	0	0	0	0	0	0	0	0	0	0	0	0	0	0	0	0	0	0	0	0	0	0	0
hsa-miR-5581-5p	0	0	0	0	0	0	0	0	0	0	0	0	0	0	0	0	0	0	0	0	0	0	0	0	0	0	0	0	0	0	0	0	0	0	0	0	0	0	0	0	0	0	0	0	0	0	0	0	0
hsa-miR-5582-3p	0	0	0	0	0	0	0	0	0	0	0	0	0	0	0	0	0	0	0	0	0	0	0	0	0	0	0	0	0	0	0	0	0	0	0	0	0	0	0	0	0	0	0	0	0	0	0	0	0
hsa-miR-5582-5p	0	0	0	0	0	0	0	0	0	0	0	0	0	0	0	0	0	0	0	0	0	0	0	0	0	0	0	0	0	0	0	0	0	0	0	0	0	0	0	0	0	0	0	0	0	0	0	0	0
hsa-miR-5583-3p	0	0	0	0	0	0	0	0	0	0	0	0	0	0	0	0	0	0	0	0	0	0	0	0	0	0	0	0	0	0	0	0	0	0	0	0	0	0	0	0	0	0	0	0	0	0	0	0	0
hsa-miR-5583-5p	0	0	0	0	0	0	0	0	0	0	0	0	0	0	0	0	0	0	0	0	0	0	0	0	0	1	0	0	0	0	0	0	0	0	0	0	0	0	0	0	0	0	0	0	0	0	0	0	0
hsa-miR-5584-3p	0	0	0	0	0	1	0	0	0	0	0	0	0	0	0	0	0	0	0	0	0	0	0	0	0	0	0	0	0	0	0	0	0	0	0	0	0	0	0	0	0	0	0	0	0	0	0	0	0
hsa-miR-5584-5p	0	0	1	0	0	0	1	2	0	0	0	0	1	0	0	0	0	0	0	1	1	0	0	0	0	0	0	0	0	0	0	0	0	0	0	0	0	0	0	0	0	0	1	0	1	0	0	0	0
hsa-miR-5585-3p	0	0	0	0	0	0	0	0	0	0	0	0	0	0	0	0	0	0	0	0	0	0	0	0	0	0	0	0	0	0	0	0	0	0	0	0	0	0	0	0	0	0	0	0	0	0	0	0	0
hsa-miR-5585-5p	0	0	0	0	0	0	0	0	0	0	0	0	0	0	0	0	0	0	0	0	0	0	0	0	0	0	0	0	0	0	0	0	0	0	0	0	0	0	0	0	0	0	0	0	0	0	0	0	0
hsa-miR-5586-3p	0	0	0	0	0	0	0	0	0	0	0	0	0	0	0	0	0	0	0	0	0	0	0	0	0	0	0	0	0	0	0	0	0	0	0	0	0	0	0	0	0	0	0	0	0	0	0	0	0
[truncated: 581 more rows]
[truncated: 130 more columns]

## Sheet: Supplemental Dataset 2
Supplemental Dataset 2- Batch adjusted, log10-transformed miRNA expression data, filtered for miRNA detection levels in both cohorts.
	Sample
miRNA	1	2	3	4	5	6	7	8	9	10	11	12	13	14	15	16	17	18	19	20	21	22	23	24	25	26	27	28	29	30	31	32	33	34	35	36	37	38	39	40	41	42	43	44	45	46	47	48	49
hsa-let-7a-3p	1.63046	1.93956	1.8551	1.928	1.31404	1.28738	1.76638	1.42863	2.06663	1.65446	1.68806	1.60545	1.77522	2.11994	1.69869	1.67759	1.57792	1.71917	1.80926	2.04418	2.03441	1.38618	1.76638	1.69912	1.99487	1.6309	1.76638	1.64263	1.82467	1.57792	1.38618	1.57835	1.90293	1.79236	1.83237	1.64306	1.53413	1.80067	0.967445	1.64263	1.92187	1.77522	1.59212	1.38618	1.28738	1.66596	2.05287	1.44816	0.902301
hsa-let-7a-5p	4.18628	3.9752	3.97037	3.71243	3.90881	4.0773	3.86442	3.9569	4.15071	4.03506	3.991	4.19532	4.08093	3.06925	4.19347	4.10159	3.54734	3.85168	4.25602	4.30586	3.91938	3.81034	3.52621	3.75196	4.03169	3.80748	3.6841	4.18738	3.79759	3.99628	3.39343	4.02806	3.85638	3.60559	3.96745	3.4334	3.64792	4.36555	3.67868	3.88418	4.05674	4.08807	3.70996	3.24533	3.6974	3.71578	3.98038	3.32374	3.92418
hsa-let-7b-3p	0.639502	1.18183	0.948315	1.06458	1.18183	1.1566	1.18183	1.27711	0.414765	1.06294	1.18183	0.990552	1.40296	1.18347	1.12636	1.1566	1.38684	1.43353	1.31742	1.46377	1.09579	1.02747	1.09579	1.27711	1.23112	1.38848	1.18183	1.35274	1.29609	1.15496	1.06294	1.128	0.901624	1.29609	1.27547	0.790252	1.25549	1.18183	0.901624	1.31579	1.31742	0.639502	1.02911	1.12636	0.901624	1.70215	1.33465	0.990552	1.09579
hsa-let-7b-5p	3.9392	3.72572	3.7983	4.0135	3.61229	3.55842	4.06268	3.98509	3.49487	3.69692	3.72911	3.54581	3.76758	4.34003	3.77802	3.94951	4.545	3.29322	3.76615	4.32739	3.77929	3.77052	4.02617	3.88536	3.89402	3.97585	3.99705	4.51963	4.51608	3.74424	3.88986	3.58839	3.81983	4.62133	3.87307	3.77146	4.17918	4.65818	3.57203	4.30801	4.02603	3.98699	3.8714	4.06154	3.58425	4.25732	4.30229	3.92295	3.74104
hsa-let-7c-5p	2.781	2.69375	2.55636	2.53511	2.42828	2.515	2.53193	2.72294	2.57	2.57566	2.56512	2.60333	2.56994	2.23465	2.71734	2.73248	2.49277	2.31643	2.82279	3.03264	2.69302	2.38731	2.42697	2.52038	2.66889	2.54838	2.4766	2.97547	2.7411	2.46468	2.06283	2.59613	2.53511	2.59425	2.45369	2.14961	2.55039	3.19723	2.25604	2.6225	2.825	2.65554	2.49283	2.11987	2.38595	2.6293	2.74242	3.01438	2.38157
hsa-let-7d-3p	2.23103	2.67546	2.54521	2.26892	2.52647	2.81202	2.65372	3.09304	2.04671	2.69398	2.67318	2.63709	2.73865	3.13007	2.64323	2.83493	3.17641	2.79076	2.72887	2.89749	2.68222	2.56548	2.42493	2.61765	2.58277	2.69058	2.4847	2.78495	2.72066	2.61276	2.44494	2.68619	2.33774	2.76764	2.74125	2.29743	2.65091	2.44232	2.46158	2.66705	2.74965	2.1292	2.50545	2.61539	2.31894	2.91236	2.67242	2.38664	2.88275
hsa-let-7d-5p	3.16767	2.97033	3.11956	2.73954	2.98146	3.10834	3.07581	2.96163	2.87464	3.07411	3.07241	3.14625	3.12452	2.38362	3.12565	3.08705	2.90995	2.81536	3.11495	3.27145	2.83991	3.01764	2.60673	2.85622	3.04384	2.60177	2.62007	2.91363	2.74318	2.99892	2.58915	2.88521	2.8645	2.57482	3.04565	2.5138	2.49196	2.91056	2.51075	2.8237	2.99282	3.06295	2.54748	2.20693	2.61283	2.3648	2.9913	2.32917	2.84992
hsa-let-7e-5p	1.80488	1.34444	1.50806	1.70304	1.72841	2.10741	1.95977	2.4874	1.23066	1.87003	2.10062	1.84243	1.90335	1.35761	1.8245	1.91438	1.77371	1.5554	1.83781	2.1619	1.90335	1.82927	1.70389	1.87775	2.55901	1.88198	1.73434	1.79473	1.67792	1.92297	1.26682	1.99288	2.05385	1.37204	1.67792	1.90251	1.83781	1.65739	1.6635	2.1866	2.27181	1.42252	2.07334	1.5554	1.85153	2.10825	1.38521	1.77287	1.93433
hsa-let-7f-5p	4.06975	4.0001	3.98455	3.67049	3.83184	4.0314	3.75705	3.71059	4.37066	3.98612	3.94165	4.24917	4.00513	3.09037	4.19728	4.01765	3.1007	3.8296	4.20921	4.14466	3.83033	3.58735	3.33773	3.5675	3.97548	3.68425	3.61895	3.97171	3.60848	3.80701	3.14878	3.9548	3.71916	3.31845	3.91163	3.3861	3.64728	4.27702	3.42895	3.67814	3.95671	3.91346	3.64468	2.95402	3.69716	3.59841	3.83696	3.35686	3.55821
hsa-let-7g-5p	4.14239	3.79074	3.76357	3.37507	3.42626	3.64267	3.4072	3.30117	4.44127	3.5958	3.55662	3.86767	3.70985	3.02666	3.84756	3.5206	2.96018	3.64422	3.87231	3.71961	3.40476	3.17032	3.17409	3.2252	3.58765	3.43336	3.37769	3.75778	3.55693	3.43486	2.974	3.63693	3.38355	3.40298	3.6883	3.19079	3.39597	3.97379	3.01604	3.41007	3.52349	3.66527	3.25054	2.86284	3.19115	3.32069	3.64999	3.06485	3.11207
hsa-let-7i-5p	4.29829	4.23542	4.1878	4.06414	4.01435	4.08808	4.09001	3.92963	4.52357	4.07003	4.12422	4.27848	4.01349	3.70655	4.24366	4.14129	3.51765	3.901	4.10793	4.33317	3.93521	3.76226	3.81368	4.00114	4.07129	3.89023	3.96302	4.14568	4.09893	3.82539	3.69786	3.98764	3.91279	3.91062	4.13753	3.64033	3.84589	4.42636	3.45372	3.89254	4.05502	3.96924	3.79113	3.37892	3.77692	3.72806	4.19579	3.62782	3.52689
hsa-miR-1	1.50603	2.36379	1.4701	1.59065	2.11207	1.83676	2.03266	1.71589	1.26753	2.15544	2.41472	1.84778	2.22906	-0.150154	1.73699	2.01068	0.577276	2.35855	2.14454	1.86384	2.205	1.074	0.789784	1.07427	1.70828	1.95838	1.41658	1.10318	0.890676	1.50603	0.789784	1.9454	1.91357	0.890676	1.66961	1.13086	1.30523	0.973111	1.30523	1.65317	1.5289	1.24717	1.50629	1.3874	2.01068	1.44399	1.95383	1.78974	1.90379
hsa-miR-7-5p	2.88704	2.87091	2.72679	2.75326	2.53803	2.54067	2.67947	2.94022	3.22096	2.63724	2.64261	2.94183	2.62517	2.32478	2.8415	2.81994	2.13271	2.52422	2.69198	3.26423	2.77828	2.31589	2.44773	2.55788	2.42893	2.68815	2.57576	2.80556	2.80335	2.51429	2.2854	2.69954	2.48759	2.52841	2.68045	2.16264	2.61269	2.97448	1.99112	2.30208	2.62621	2.65525	2.39435	1.96153	2.26033	2.27557	2.8535	2.75491	2.05342
hsa-miR-10a-5p	3.09744	3.17452	2.88949	2.68669	3.14252	3.26531	3.0361	3.53684	2.56895	3.22557	3.25269	3.14666	3.10028	2.92504	3.06822	3.45094	2.79985	3.24649	3.75612	3.3517	3.06517	3.05769	3.03692	3.13134	3.32226	3.78304	3.23277	3.32467	3.20415	2.87071	2.76572	3.56329	2.80557	3.09839	2.91143	2.97205	3.44046	3.20116	3.18925	3.40494	3.62223	2.18816	3.24868	2.92643	3.18732	3.82986	3.10193	3.35434	3.01626
hsa-miR-10b-5p	3.28945	3.26487	3.08687	2.93865	3.23917	3.29741	3.26392	3.81623	2.56337	3.40004	3.39631	3.34948	3.35751	3.24439	3.19405	3.49504	3.33354	3.38925	3.58221	3.64691	3.53938	3.19331	3.20226	3.49053	3.56944	3.91981	3.32499	3.63309	3.50924	3.14156	3.03117	3.60095	3.07454	3.39362	3.30075	3.43272	3.80968	3.54753	3.36914	3.62958	3.63218	2.55164	3.52652	3.17984	3.3669	4.13938	3.32976	3.45332	3.09899
hsa-miR-15b-3p	1.2378	1.57762	1.23658	1.73453	0.987656	1.06403	1.28264	1.18646	1.76291	1.06525	1.3232	1.12963	1.36023	1.59717	1.6371	1.06403	1.36023	1.28264	1.35901	1.80222	0.770265	1.42583	1.75017	1.35901	1.39429	1.06403	1.68927	1.55579	2.15681	1.3232	1.83942	0.986441	1.53157	2.17809	1.36023	1.23658	1.53157	1.86183	0.76905	1.45519	1.35901	1.75017	1.35901	1.36023	1.06403	1.28264	2.29134	1.18646	0.892693
hsa-miR-15b-5p	2.17957	2.16237	1.89743	1.76554	1.32567	1.22133	1.85547	0.960704	2.36436	1.47903	1.59185	1.38244	1.74355	1.93619	2.24945	1.49937	1.55743	1.53913	1.88924	1.94354	1.59185	1.65338	1.62371	1.43308	1.55743	1.43308	1.55743	1.86433	2.05306	1.29381	1.52002	1.13505	1.53848	2.02379	1.87302	1.40851	1.55678	2.16237	0.488325	1.71966	1.77642	2.10118	1.32502	1.68113	0.960704	1.29381	2.32183	1.32502	0.787011
hsa-miR-16-2-3p	2.87193	3.13518	2.95106	2.86578	2.61267	2.58045	3.14726	2.55764	2.88696	2.74022	2.92552	2.60862	2.75891	3.31925	3.06981	2.94299	3.54998	2.68184	2.84568	3.25656	2.7478	2.87123	3.13332	2.87548	2.95568	2.92024	3.24061	3.3315	3.71208	2.70535	3.25562	2.78907	2.87411	3.71068	3.1258	2.89878	3.24597	3.46282	2.46808	3.2617	3.23743	3.01663	2.8199	3.2898	2.5335	3.09793	3.60118	2.93177	2.60083
hsa-miR-16-5p	3.11153	2.94825	2.46945	2.51582	2.2341	2.31791	2.6835	1.84342	3.05251	2.20104	2.42471	2.37058	2.38426	2.55199	3.02193	2.39333	2.44237	2.43237	2.55774	2.71181	2.20531	2.3334	2.84702	2.4305	2.59005	2.04921	2.67631	2.86904	3.1142	2.20104	2.62073	2.2977	2.25042	3.24468	2.48925	2.18865	2.75874	3.19037	1.72069	2.45697	2.71047	3.00103	2.2977	2.61577	2.17517	2.47341	3.28942	1.99764	1.88887
hsa-miR-17-5p	2.30599	2.17363	1.99958	1.92983	2.01786	2.14718	2.03608	1.6454	2.86504	2.08672	2.09724	2.32596	2.00529	1.65932	2.31892	1.96605	1.7342	2.09201	2.28659	2.37925	1.77838	1.78878	2.00529	1.89861	2.14179	1.86508	1.84662	2.26841	2.26122	1.88975	1.95832	2.09795	1.71109	2.03009	2.09201	1.61619	2.06	2.40827	1.49597	1.79895	1.99307	2.08137	1.8096	1.68523	1.69869	1.79895	2.33458	1.33176	1.61549
hsa-miR-19a-3p	1.76405	1.8213	1.22639	1.29248	1.32261	1.10305	1.52412	0.458193	1.79308	1.52412	1.40078	1.40023	1.46687	1.05255	1.79363	1.40023	1.26126	1.50588	1.73172	1.74258	1.40078	1.14878	1.70971	1.69741	1.95129	1.32206	1.70971	1.77414	1.99514	1.42396	0.851597	1.61924	1.50532	1.57462	1.44595	1.18908	1.64691	1.83014	0.161015	1.1036	1.77358	1.86378	1.58966	1.14878	1.34973	1.55844	1.94464	1.05255	0.632587
hsa-miR-19b-3p	1.91819	1.98509	1.38863	1.52441	1.32125	1.35524	1.66378	1.38863	1.98277	1.42187	1.18839	1.35524	1.42187	1.41955	1.75353	1.31893	1.13267	1.42187	1.60813	1.69357	1.32125	1.06836	1.81592	1.60813	2.16943	1.38863	1.89005	2.03595	2.30768	1.61045	1.28149	1.67783	1.52441	2.09928	1.75353	1.58872	2.01972	2.17437	0.98997	1.45066	2.00533	2.25451	1.72339	1.57068	1.41955	1.89965	2.26253	1.06604	0.609992
hsa-miR-20a-5p	2.62126	2.78012	2.50832	2.25469	2.27322	2.40659	2.53525	1.74461	3.22123	2.37661	2.42417	2.58798	2.34091	2.24415	2.71394	2.26158	2.06632	2.45405	2.63671	2.56237	2.0767	2.20141	2.38705	2.05213	2.46068	1.98163	2.41457	2.5878	2.83688	2.13441	2.49647	2.4647	2.20325	2.62736	2.49444	2.00031	2.5481	2.73112	1.67502	2.22418	2.45589	2.49241	2.07338	2.12529	2.04666	2.32934	2.97804	1.81421	1.70932
hsa-miR-20b-5p	1.80273	1.71022	1.43226	1.40724	1.12834	1.25475	1.5391	0.166892	2.25171	1.45546	1.17446	1.21666	1.28932	1.64105	1.80273	1.28979	1.40677	1.32177	1.60977	1.68415	1.21619	1.32177	1.59277	1.01879	1.21619	1.32224	1.45546	1.68368	1.77028	1.01832	1.62522	1.43226	1.3807	1.85197	1.28932	0.951301	1.52011	1.87021	0.64785	1.17446	1.43226	1.45546	1.17493	1.25428	0.470343	1.40677	1.87905	0.773794	0.469873
hsa-miR-21-5p	4.15797	4.03052	3.9111	4.1	4.09903	4.11454	4.05974	4.01227	4.1854	4.03603	4.1631	4.27289	4.0132	3.74982	4.19079	4.29912	3.35715	3.78942	4.08703	4.13612	4.13702	3.67082	3.9818	3.84863	4.17634	3.99535	3.92575	3.57797	3.7596	3.88679	3.2751	4.07396	4.02027	3.35585	3.96005	3.62566	3.89421	3.74464	3.24594	3.73556	4.21657	3.66133	3.82717	3.11945	3.8633	3.77762	3.87488	3.66134	3.26798
hsa-miR-22-3p	3.47719	3.51627	3.55297	3.28193	3.16044	3.0675	3.39433	3.59917	3.42376	3.25981	3.33669	3.31117	3.29918	3.58073	3.43443	3.41516	3.56571	3.38122	3.65171	3.77278	3.67289	3.21761	3.41989	3.38105	3.26805	3.72355	3.43742	3.38718	3.67421	3.08572	3.09852	3.47952	2.97192	3.49658	3.73759	3.08032	3.47493	3.48259	2.75528	3.39886	3.48775	3.24787	3.19589	3.32613	2.93589	3.37384	3.75036	3.41007	2.89994
hsa-miR-22-5p	1.75598	1.7058	1.69534	1.59754	1.50558	1.38899	1.55386	1.67291	1.68428	1.55386	1.53836	1.71665	1.62385	1.68428	1.83365	1.66124	1.55386	1.69502	1.84179	2.11318	2.02187	1.36563	1.68395	1.84947	1.58325	1.70613	1.66092	1.34128	1.7464	1.4313	1.227	1.68428	1.53869	1.31545	1.69502	1.45144	1.62417	1.48819	0.897937	1.227	1.64924	1.59722	1.45144	1.02017	1.07067	1.45112	1.78347	1.34161	1.1929
hsa-miR-23a-3p	2.34839	2.31126	1.90545	1.96379	2.09739	2.16618	2.00844	1.83811	2.03557	2.07979	2.16144	2.23841	2.29328	1.25279	2.30416	1.95592	1.49175	2.4387	2.31458	1.96379	2.0916	2.05517	2.30056	2.37335	2.34514	2.1304	2.00844	2.07377	1.97171	2.25493	1.84857	2.10855	2.43322	2.12522	1.92312	2.37029	1.9479	1.80592	1.61146	1.78292	2.02212	2.22593	2.26269	1.90564	2.01524	2.27068	1.98677	1.97152	1.78292
hsa-miR-23b-3p	1.39066	1.30012	1.36217	1.22692	1.13976	1.08805	1.1857	1.29977	1.33209	1.30012	1.44203	1.33209	1.36252	0.883089	1.39066	1.44168	1.03016	1.56748	1.56713	1.33209	1.22727	1.30012	1.30012	1.39032	1.1857	1.6185	1.03016	0.962942	1.13976	1.13976	1.03016	1.22692	1.69259	1.13976	1.30012	1.52919	1.13941	1.03016	0.962596	1.08839	1.26487	1.03016	1.18536	0.962942	1.13941	1.22727	1.4171	1.22692	0.883435
hsa-miR-24-2-5p	1.60049	1.71894	1.43664	1.50816	1.32927	1.50816	1.4794	1.45195	1.45195	1.40266	1.46513	1.52111	1.5789	0.868441	1.5789	1.52111	0.866847	1.56767	1.7797	1.59142	1.50656	1.38547	1.51951	1.7797	1.56767	1.55773	1.36756	1.28714	1.05709	1.4794	1.01698	1.31032	1.50816	1.34885	1.32927	1.48099	1.28873	1.12741	0.726815	1.12741	1.49479	1.60049	1.52111	0.866847	1.2164	1.51951	1.1586	0.974222	0.801963
hsa-miR-24-3p	3.45705	3.40043	3.12137	3.18481	3.25435	3.24448	3.07164	3.04976	3.22478	3.25834	3.18927	3.37484	3.35571	2.77809	3.45327	3.11378	2.57118	3.40611	3.59414	3.26258	3.44707	3.00505	3.32044	3.42878	3.36627	3.17467	3.13197	3.12049	2.97061	3.52494	2.82358	3.33721	3.3299	3.10765	3.29634	3.35006	3.05657	2.92191	2.74497	2.88864	3.2333	3.47588	3.21499	2.70677	2.94978	3.15246	3.06469	2.7274	2.91259
hsa-miR-25-3p	3.81387	3.97712	3.63545	3.65028	3.36788	3.38291	3.80743	3.18954	3.80533	3.33396	3.51887	3.33369	3.42607	3.71174	3.75673	3.46238	3.91899	3.35405	3.33437	3.7539	3.08052	3.51666	3.73713	3.41757	3.69715	3.38457	3.9007	4.09653	4.3765	3.47821	3.9312	3.37497	3.44827	4.439	3.63114	3.62829	3.94608	4.32065	3.15937	3.7754	3.84607	3.77349	3.70081	3.96965	3.44801	3.83788	4.29377	3.47445	3.27708
hsa-miR-26a-5p	3.77986	3.56633	3.55645	3.69517	3.91036	3.98292	3.82582	3.85119	3.6098	3.93384	3.97817	4.133	3.83248	3.25486	4.00137	4.00083	3.03026	3.83468	3.8687	4.05313	3.84644	3.80403	3.71297	3.88423	4.17009	3.75581	3.68262	3.62207	3.40958	3.8101	3.19244	3.85273	3.70861	3.09479	3.81563	3.75053	3.68099	3.653	3.36131	3.65718	4.04158	3.4596	3.76206	3.16202	3.77236	3.70763	3.31251	3.41503	3.69293
hsa-miR-26b-5p	3.07159	3.02236	3.05211	2.76272	2.7588	2.86402	2.7362	2.70598	3.63114	2.99373	2.86593	3.22588	2.93524	2.27345	3.12135	2.92346	2.26334	3.00301	3.30858	3.06761	2.96159	2.54035	2.65905	2.86786	2.97981	2.60444	2.48274	2.85325	2.77796	2.61732	2.05229	2.89022	2.74038	2.53227	2.93027	2.3314	2.6441	3.23695	1.98685	2.45935	2.83206	3.00793	2.46318	2.0979	2.3855	2.52818	2.86689	2.23546	2.26334
hsa-miR-27a-3p	3.5094	3.37454	2.98651	3.3359	3.05809	2.97591	3.09779	2.99768	3.31455	3.18044	3.22556	3.3083	3.49563	2.77135	3.38513	3.1885	2.59085	3.32426	3.65426	3.39128	3.46776	3.03823	3.27955	3.54335	3.43329	2.99234	2.94938	3.01155	2.95884	3.39162	2.7068	3.1037	3.3953	3.006	3.05879	3.18273	3.04331	2.94756	2.47377	2.9123	3.19058	3.452	3.14259	2.49911	2.904	3.17135	3.11231	2.65544	2.42937
hsa-miR-27b-3p	2.88227	2.94657	2.62457	2.73383	2.70353	2.72247	2.73904	2.8336	2.62235	2.80092	2.81617	2.86469	2.85114	2.68745	3.05794	2.90199	2.28384	2.8792	3.09173	3.08563	2.99554	2.55632	2.99789	2.78196	2.96571	2.77338	2.91133	2.61906	2.78968	2.63559	2.36351	2.76784	2.83291	2.56148	2.63342	2.57901	2.85304	2.63015	2.15135	2.51124	3.02338	2.57412	2.9888	2.177	2.77101	2.92041	2.94125	2.49504	2.20116
hsa-miR-28-3p	2.66624	2.38917	2.28454	2.1473	2.55619	2.56242	2.31291	2.42174	2.17922	2.46585	2.44603	2.59808	2.32055	1.84277	2.34816	2.43376	1.94765	2.3908	2.21388	2.19688	2.15604	2.24668	2.39243	2.33124	2.46446	2.37535	2.35876	2.23084	2.15874	2.41152	1.86413	2.43079	2.07916	2.12237	2.20964	2.24166	2.25276	2.22853	2.17664	2.39243	2.37703	2.09231	2.47353	2.19495	2.32	2.42985	2.02561	2.04609	2.40524
hsa-miR-28-5p	1.53491	1.29944	1.29993	1.23867	1.55106	1.5354	1.35302	1.51861	1.20441	1.51812	1.50064	1.68644	1.2699	0.829634	1.59617	1.42309	0.610464	1.37749	1.32756	1.42309	1.08076	1.32707	1.35302	1.2704	1.55106	1.08126	1.12587	0.829141	0.733616	1.23818	0.610464	1.29993	1.08126	0.733616	1.2699	1.08126	0.907683	0.973179	0.73411	0.973179	1.35351	0.90719	1.20441	0.733616	1.20441	1.16667	0.829141	0.73411	0.733616
hsa-miR-29a-3p	3.21898	2.47908	2.542	2.29305	2.09672	2.12703	2.26523	2.51225	2.87961	2.28313	2.33041	2.22858	2.47119	2.24286	2.87036	2.78688	1.42394	2.37486	3.2576	2.65501	2.69012	2.1619	2.45661	2.53511	2.6284	3.16523	2.35848	2.39255	2.2626	2.10832	1.77606	3.13975	2.57104	2.36264	2.15854	2.71683	2.54336	2.46478	1.93171	2.29303	2.53092	2.37686	2.55012	1.99507	2.26474	2.7058	2.78622	2.36382	1.65932
hsa-miR-30a-3p	1.92452	1.83473	1.73963	1.55832	1.5581	1.60118	1.52048	1.96876	1.57598	1.79493	1.70232	1.87139	1.72127	1.34041	1.77357	1.88004	1.083	1.7453	1.88852	2.03041	2.04212	1.60096	1.63994	1.83017	1.75683	1.72149	1.51053	1.5581	1.6757	1.43369	1.25835	1.84435	1.64016	1.39607	1.60904	1.46853	1.81551	1.63242	1.46853	1.7453	1.87139	1.2006	1.58454	1.34019	1.54922	2.14851	1.40898	1.69604	1.23994
hsa-miR-30a-5p	2.54752	2.51506	2.21498	2.1414	2.18858	2.3129	2.24467	2.44033	2.15131	2.34509	2.40888	2.45833	2.36939	1.92993	2.37912	2.63373	1.84555	2.44834	2.47868	2.62072	2.58613	2.2872	2.68945	2.47407	2.61157	2.60845	2.45807	2.43502	2.44505	1.94574	1.99536	2.44199	2.38702	2.27999	2.31489	2.24229	2.59698	2.36344	2.03158	2.2872	2.66062	1.83207	2.53589	2.0916	2.32617	2.83922	2.44505	2.29921	1.81815
hsa-miR-30c-5p	2.43681	2.18311	2.06209	2.29561	2.45989	2.37205	2.29553	2.36131	2.40862	2.31293	2.44225	2.53288	2.29299	1.84465	2.59886	2.44052	1.77365	2.37409	2.43506	2.63716	2.43131	2.31777	2.19928	2.57583	2.56911	2.43323	2.30308	2.47181	2.18965	2.47683	1.99083	2.41057	2.13803	2.1663	2.49472	2.51502	2.3081	2.67636	2.08342	2.45816	2.55971	2.08748	2.48349	1.99083	2.313	2.42946	2.04416	2.27748	2.23868
hsa-miR-30d-5p	3.65201	3.82116	3.48033	3.49147	3.73969	3.90134	3.74116	3.67073	3.50514	3.70228	3.89888	3.75	3.68073	3.76461	3.78309	3.75903	3.77296	3.72401	3.56325	3.6983	3.37765	3.71443	3.96697	3.59326	3.89668	3.61382	3.86416	3.95008	4.11556	3.61248	3.69392	3.52353	3.46305	4.10725	3.68986	3.64668	3.81393	3.9725	3.41046	3.77475	3.90203	3.51076	3.81659	3.83916	3.6364	3.92426	3.95634	3.53412	3.65172
hsa-miR-30e-3p	2.43965	2.41516	2.27564	2.36068	2.45907	2.47909	2.32381	2.50829	2.43197	2.43566	2.44229	2.57917	2.38924	1.82317	2.61801	2.48746	1.4903	2.26108	2.42247	2.47055	2.62415	2.20851	2.33569	2.38525	2.56049	2.24391	2.26305	2.26894	2.14111	2.37873	1.82947	2.45168	2.42657	2.05843	2.35853	2.21634	2.25206	2.39805	2.0511	2.22171	2.45424	2.14628	2.40282	1.9323	2.32962	2.37261	2.00519	2.0382	2.12523
hsa-miR-30e-5p	3.18177	3.00482	2.74667	2.71187	2.5682	2.70484	2.72964	2.48702	3.12331	2.57599	2.67224	2.71879	2.71043	2.68894	3.03258	2.71879	2.84106	2.72695	2.80424	2.98413	2.79192	2.58929	2.9949	2.83867	3.02863	2.58418	2.98475	3.03061	3.24056	2.64853	2.34567	2.78356	2.55489	3.14874	2.79307	2.48225	3.02794	3.10026	2.09253	2.57599	3.00276	3.00761	2.80536	2.65338	2.51903	2.85024	3.32818	2.41185	2.22739
hsa-miR-32-5p	1.64047	1.76819	1.65954	2.01887	1.42786	1.19977	1.55311	1.3763	2.25594	1.60973	1.60973	1.67807	1.80361	1.93196	1.87266	1.80332	1.54084	1.56504	2.15335	2.19123	1.99353	1.03692	1.56504	1.84234	1.65026	1.44341	1.35805	1.25133	1.39435	1.22644	0.840134	1.48772	2.00625	1.03692	1.817	1.14163	1.44341	1.65983	0.294431	1.27487	1.60945	1.42786	0.839852	0.294713	0.949267	1.14191	1.93224	1.10937	0.294713
hsa-miR-92a-3p	3.68227	3.87309	3.68361	3.68643	3.72256	3.81916	4.0478	3.82188	3.49039	3.672	3.85114	3.51963	3.65398	4.45543	3.71876	3.87223	4.481	3.69943	3.55232	4.06489	3.34876	3.77082	3.7024	3.56608	3.72699	3.85137	3.95361	4.29736	4.42912	3.43953	3.99016	3.46108	3.46962	4.4591	3.95049	3.55961	4.06388	4.37662	3.43589	4.11475	3.97918	3.53169	3.71457	4.16437	3.53645	4.07166	4.30167	3.87838	3.75856
hsa-miR-92b-3p	1.25267	1.39992	1.30773	1.15304	1.02165	1.28108	1.50823	1.84644	1.02158	0.966521	1.35642	1.02158	1.22208	1.84644	1.3078	1.58077	1.98241	1.3078	1.91702	1.686	0.827616	1.25267	1.52381	1.02158	1.28115	1.97215	1.47518	1.70621	1.8801	0.827616	1.39992	1.22201	0.735426	1.80996	1.45761	1.0702	1.73462	1.73469	1.1137	1.5673	2.11836	0.827616	1.02158	1.67561	0.96645	1.76133	1.75264	1.18896	1.28115
hsa-miR-93-5p	2.59294	2.5637	2.33108	2.26186	2.23398	2.2656	2.25346	1.891	3.02631	2.21776	2.30722	2.34372	2.23795	2.10631	2.59821	2.21026	2.20091	2.38727	2.66395	2.59023	2.39563	2.14615	2.29351	2.25048	2.37874	2.13217	2.29002	2.54439	2.68518	2.25726	2.41191	2.32463	2.06736	2.71164	2.40113	2.13217	2.42588	2.74421	1.67091	2.04871	2.34059	2.52831	2.11161	2.13133	1.85489	2.1834	2.7722	1.8642	1.99739
hsa-miR-98-5p	2.08743	2.11865	1.86201	1.98925	2.21762	2.4127	2.16331	2.11274	2.22043	2.20671	2.22827	2.48047	2.12199	1.58771	2.44064	2.28252	1.15352	2.1119	2.32034	2.45584	2.00921	1.99622	1.94511	2.09902	2.49776	1.95708	2.05774	2.09456	1.91459	2.1119	1.5329	2.17862	2.01512	1.65069	2.2203	1.80576	2.01929	2.16633	1.62888	1.88186	2.43478	1.92499	1.96651	1.35548	2.07398	2.00059	2.05001	1.72591	1.95484
hsa-miR-99a-5p	3.24818	3.26791	3.10714	3.0308	3.18343	3.22075	3.19027	3.6261	2.74903	3.38832	3.39662	3.1346	3.24032	3.18361	3.27054	3.33381	3.35924	3.60034	3.40256	3.56206	3.55827	3.23516	3.44342	3.48865	3.2974	3.7518	3.30896	3.24381	3.27315	2.87293	2.84615	3.04944	3.0308	3.13003	2.87239	3.26088	3.29606	2.94027	2.73696	3.09753	3.45655	2.47982	3.58718	2.71259	3.24289	3.57447	3.2261	3.2611	2.66707
hsa-miR-99b-5p	2.4365	2.13151	2.17121	2.01184	2.51799	2.89971	2.51474	2.9843	1.79355	2.40973	2.74148	2.58456	2.33129	2.2594	2.40696	2.70284	2.32964	2.45056	2.25154	2.37952	2.42996	2.24375	2.13927	2.36752	2.69091	2.85929	2.26925	2.28238	2.20358	2.12093	2.03219	2.68339	1.97978	2.0289	2.22938	2.36904	2.44273	2.23559	2.32105	2.47142	2.57427	1.50804	2.57616	2.23146	2.34571	2.76717	1.90778	2.18297	2.4605
hsa-miR-100-5p	2.58395	2.5175	2.08857	2.2592	2.09672	2.07069	2.14016	2.58897	1.72213	2.34325	2.34325	2.33895	2.5175	2.314	2.50133	2.62497	2.20687	2.50133	2.25528	2.54169	2.54216	2.21344	2.58214	2.50404	2.64841	3.36437	2.75192	2.52485	2.58845	2.39996	2.13757	2.80552	2.50948	2.81244	2.91201	2.64738	2.61331	2.37106	2.26884	2.44748	2.71495	2.21775	2.7801	1.96337	2.63552	2.89284	2.64373	2.58897	1.91352
hsa-miR-101-3p	3.61395	3.94336	3.62109	3.63117	3.07073	3.00482	3.59846	3.04299	4.0609	3.23086	3.40368	3.19595	3.36431	3.56286	3.64165	3.54058	3.08529	3.04596	3.41442	3.68502	3.1911	2.88569	3.36126	3.21425	3.335	2.96471	3.48096	3.33874	3.79983	2.93024	3.04399	3.20689	3.46083	3.522	3.43619	2.88638	3.48308	3.6701	2.30908	3.14729	3.35482	3.34711	3.01124	2.87634	2.82384	3.17359	4.01786	3.08392	1.96769
hsa-miR-103a-3p	3.07744	3.0107	2.95052	2.64692	2.88834	3.13931	2.71011	2.57479	3.6073	3.06718	3.00636	3.35824	3.01872	2.40835	3.22949	2.8795	2.40548	3.0742	3.16521	2.84419	2.77034	2.66379	2.15882	2.46293	2.81969	2.45297	2.39406	2.65638	2.51065	2.80853	2.36036	2.94362	2.78867	2.3013	3.04588	2.3534	2.25955	2.82306	2.37817	2.46427	2.66319	2.87443	2.25955	1.91473	2.38533	2.13391	2.74181	2.14717	2.58314
hsa-miR-106b-3p	2.86157	2.8515	2.45917	2.43373	2.49813	2.69757	2.4731	2.41939	2.87018	2.44853	2.54587	2.51453	2.3025	2.22703	2.76439	2.46671	2.45814	2.53958	2.29259	2.55309	2.1255	2.37696	2.78669	2.58285	2.5731	2.14236	2.63081	2.7528	2.95445	2.37005	2.4822	2.37798	2.27276	2.97861	2.4057	2.23341	2.61876	2.96	2.07079	2.33631	2.52449	2.65707	2.58714	2.42661	2.31684	2.55666	2.81137	2.23023	2.18919
hsa-miR-106b-5p	2.03011	2.13195	1.96507	1.99226	1.45073	1.37598	1.69082	1.12576	2.50383	1.61936	1.57008	1.67743	1.71641	1.9988	1.92081	1.66362	1.61936	1.42721	2.29039	2.10737	2.17297	1.28569	1.7038	1.69081	1.57008	1.67743	1.61936	1.88014	2.07593	1.40236	1.21304	1.55232	1.61936	1.92081	2.00525	1.37598	1.74057	2.20644	0.773093	1.51448	1.76346	1.84461	1.17158	1.28569	0.949427	1.45073	2.27001	1.42721	0.471655
hsa-miR-107	2.22005	2.29631	2.36067	2.07415	1.60401	1.55513	2.05892	1.79723	2.5613	1.79757	1.95129	1.87692	2.08457	2.35542	2.07956	1.88493	2.24814	1.99025	2.22331	2.24438	2.04821	1.84367	1.73479	1.66085	1.73479	1.96433	1.8072	1.8072	2.17006	1.63356	1.79757	1.67402	1.80685	2.09926	2.4907	1.64725	1.7773	2.09926	1.2408	2.0536	1.97731	2.12267	1.41444	1.58844	1.16272	1.50073	2.49645	1.86877	1.20389
hsa-miR-122-5p	3.74116	4.19402	3.5867	4.29816	3.64714	3.69049	3.94397	4.37999	3.0471	4.16612	4.18148	3.59545	3.73189	3.73787	4.00412	3.80728	3.62578	3.86089	3.97451	4.33897	4.67349	3.74638	5.0167	3.61103	4.17732	4.03437	4.65184	3.92952	4.56559	3.40522	3.75427	3.77017	4.10829	3.73425	3.33465	3.74927	4.48059	3.61359	3.14516	3.90493	4.56117	3.18722	4.86683	3.23381	4.72765	4.35597	4.39488	4.29218	3.17549
hsa-miR-125a-5p	1.85655	1.78304	1.72134	1.23162	1.94106	2.5152	2.04951	2.72677	1.2086	2.14652	2.27491	2.14957	2.0528	1.72838	1.92368	2.06984	1.73748	2.2426	1.97166	2.02705	1.9009	1.95365	1.70167	1.91254	2.38409	2.13638	1.9495	2.3609	2.13587	1.601	1.42832	2.26488	0.998864	1.82419	1.91016	1.75543	2.29912	1.91471	2.03392	2.10514	2.30816	0.665257	1.93889	2.10514	2.02357	2.89214	1.55084	1.76833	2.29763
hsa-miR-125b-5p	1.27554	1.55658	1.36763	0.937697	1.49884	1.73604	1.57762	2.02066	0.475379	1.68566	1.74482	1.57581	1.6168	1.62423	1.53442	1.70701	1.73786	1.92679	1.53261	1.77615	1.58776	1.47333	1.56723	1.54383	1.85892	2.52803	1.77797	1.89903	1.7843	1.2312	1.33436	1.78871	1.09244	1.6351	1.71627	1.59585	1.92047	1.4319	1.40002	1.53442	1.91592	0.477195	1.64214	1.4319	1.70701	2.30516	1.66947	1.65082	1.4319
hsa-miR-126-3p	3.8811	3.63826	3.58492	3.71275	3.64582	3.70319	3.67834	3.88788	3.61319	3.81154	3.79205	3.90287	3.71646	3.24068	3.86562	3.8494	2.86213	3.57639	3.85945	4.01387	3.94947	3.54927	3.66807	3.82249	3.77512	3.46551	3.40668	3.39771	3.40112	3.30241	2.94364	3.61937	3.38455	3.01087	3.45448	3.51527	3.51042	3.56727	3.00533	3.42391	3.61937	3.14796	3.46755	2.94561	3.37958	3.78419	3.1365	3.19521	2.98263
hsa-miR-126-5p	2.04289	1.83065	1.5535	1.73554	1.94301	1.96865	1.8867	1.94301	1.73554	1.8867	1.96238	2.09246	1.99287	1.6137	2.06838	2.01018	0.898052	1.89415	1.95602	2.10173	1.98694	1.83065	2.16956	2.01018	2.2143	1.87912	2.00449	1.94957	1.95602	1.70243	1.3519	2.06339	1.83065	1.76632	2.0634	1.8867	2.05835	1.99287	1.50217	1.95602	2.26444	1.64095	1.82202	1.69081	1.93635	2.22825	1.90868	1.5535	1.56935
hsa-miR-128-3p	2.44065	3.0421	2.81929	2.55643	3.09783	3.29654	3.13384	3.16811	2.07249	2.98738	3.06935	3.06529	2.91813	3.1285	2.99791	3.10002	3.19816	3.00994	2.80112	3.18531	2.95114	3.03512	3.08179	2.88628	3.1452	2.7866	2.96552	3.1252	3.1728	2.78501	2.74366	2.86653	2.42403	3.08475	2.83081	2.67018	3.01164	2.91044	2.63058	2.89577	3.15676	2.2614	2.96852	3.03677	2.92056	3.19589	2.95864	2.52494	3.04657
hsa-miR-130a-3p	1.39916	1.4578	1.25241	1.51212	1.35496	0.896928	1.33098	1.18773	1.42252	0.958717	1.30554	1.28135	1.27847	1.06704	1.43915	1.47854	1.50924	1.21843	2.16413	1.58591	1.37764	0.958717	1.24952	1.15123	1.24952	2.014	1.01474	1.01474	1.21843	0.723934	0.894044	1.35784	1.15123	1.35496	1.30554	1.28135	1.01762	0.723934	0.145208	1.35496	1.33386	0.958717	0.961601	0.433129	0.606123	0.603239	1.54033	0.961601	0.433129
hsa-miR-130b-5p	0.0175944	1.25141	0.954014	0.0160809	1.72038	2.06678	1.6701	1.74194	0.0160809	1.6789	1.55899	1.59076	1.25141	0.607851	1.42449	1.53376	0.905249	1.42449	1.03967	1.2499	0.0175944	1.49702	1.22701	1.03967	1.29639	0.903735	1.29639	1.51015	1.14413	1.07833	1.0005	1.07682	0.0160809	0.905249	1.0005	0.780932	1.2499	0.848248	1.14262	1.0005	1.40687	0.0175944	0.998989	1.22701	1.3157	1.51015	0.782446	0.846735	1.58146
hsa-miR-134-5p	2.47622	2.08099	2.29572	1.94198	2.39635	2.50723	2.04153	2.39068	1.5292	2.12349	2.71155	2.10874	2.09116	2.02738	2.39803	1.67127	1.33645	2.70657	2.12461	1.45087	2.19263	2.08099	2.06704	2.21458	2.38613	1.77179	2.29672	2.02236	1.79751	2.36856	1.73466	1.67987	1.79863	1.7421	2.56964	1.87608	1.94198	1.83495	2.17467	2.68077	2.15182	1.06502	1.87058	1.5842	1.94666	1.72709	2.10438	1.72051	2.80902
hsa-miR-139-3p	0.998127	1.13667	1.1675	0.910494	1.36485	1.81383	1.43115	1.694	-0.0709854	1.68332	1.21811	1.38438	1.19258	0.729377	1.19258	1.60911	1.19258	1.13667	1.10786	1.54198	1.44629	1.21811	1.39923	0.910494	1.41547	1.26718	1.30775	1.39923	1.38237	0.955553	0.855877	1.28897	0.729377	0.727372	1.07275	1.1675	1.55389	1.03699	1.22012	1.30775	1.30975	0.41775	1.30975	1.28697	1.47713	1.78474	0.546254	1.07475	1.44629
hsa-miR-139-5p	2.08109	1.68283	1.71937	1.67388	1.81893	2.19787	1.88885	2.28977	0.902775	2.15765	1.92818	2.17694	1.62262	1.69264	1.98839	2.01177	1.64362	1.92277	1.74456	2.25783	2.20601	1.77553	1.97409	1.96975	1.98367	1.81252	1.74403	1.83912	1.71883	1.52693	1.46997	1.83303	1.17989	1.43847	1.52693	1.61227	1.96975	1.7101	1.5779	1.93881	1.7836	1.04263	1.7983	1.61174	1.7836	2.29862	1.25973	1.54062	1.66366
hsa-miR-140-3p	3.96994	3.55076	3.34694	3.17484	2.93056	2.82371	3.22795	2.5727	3.74852	2.95209	3.00443	2.92463	3.17808	3.10065	3.40151	2.86414	3.02146	3.1408	3.3801	3.23956	2.96245	2.97691	3.1668	2.88452	3.02034	2.58688	3.02698	3.24564	3.47242	2.95209	3.09805	2.77998	3.01732	3.65954	3.13701	2.95934	3.07173	3.4399	2.50124	3.00327	2.95934	3.50066	2.92114	3.00094	2.60061	2.8777	3.60996	2.78871	2.47625
hsa-miR-140-5p	1.97408	1.80018	1.30885	1.39212	1.5402	1.43983	1.59072	1.27706	1.46183	1.3923	1.55771	1.66341	1.46201	0.945438	1.87183	1.27706	1.59072	1.52195	1.71393	1.81906	1.63591	1.27724	1.78022	1.57435	2.16912	1.54002	1.84634	1.92599	1.92599	1.81924	1.30903	1.74826	1.5027	1.97408	1.72586	1.57435	1.81906	1.7373	1.33844	1.3923	1.88783	1.89588	1.76971	1.33862	1.59054	1.88801	1.80982	1.39212	1.11952
hsa-miR-142-3p	2.17783	2.01899	2.05769	2.09522	2.0439	2.01222	1.97867	2.02932	2.33394	2.11095	2.15357	2.37505	2.09693	1.44499	2.32794	2.27685	0.939258	2.03576	2.23233	2.34208	2.39325	1.66803	1.77112	2.19703	2.28428	1.9944	1.87856	1.91278	1.48981	1.85412	0.642942	2.21369	2.03762	1.17849	2.03985	1.8367	1.68889	1.95946	1.18035	1.5043	2.12303	1.75558	1.77298	0.939258	1.78799	1.79343	1.6582	1.46112	1.14681
hsa-miR-142-5p	3.73654	3.27593	3.0828	3.1172	2.71201	2.6099	3.0817	2.585	3.69335	2.86768	2.91205	2.86848	3.19513	3.0717	3.31957	2.92264	2.8022	3.00193	3.48153	3.33376	3.08507	2.78478	3.17859	3.17529	3.30501	2.86076	2.97238	3.10955	3.34294	3.14014	2.81106	2.88284	3.17291	3.46692	2.98688	3.0828	3.11172	3.4761	2.32097	3.13718	3.11875	3.54194	3.05042	2.84914	2.59302	2.96075	3.4918	2.66924	2.31905
hsa-miR-143-3p	2.97293	3.70849	2.80899	3.10377	3.14167	3.03463	3.20464	2.63424	3.0122	2.98587	3.25018	3.52341	3.03023	2.43159	3.347	3.01965	2.88913	3.05124	3.43166	3.02793	3.40907	2.81749	3.03404	3.09602	3.67673	2.85982	3.10752	3.29904	3.11426	3.31136	2.47843	3.03033	3.22863	3.14608	2.92794	2.89876	3.27081	2.93578	2.48469	2.69412	3.26309	3.62791	3.38496	2.76383	3.19213	3.41025	3.21749	3.96377	2.23332
hsa-miR-144-3p	2.85031	2.96586	2.81469	2.85801	2.19947	1.92845	2.38569	2.09238	3.35473	2.3499	2.44939	2.28202	2.25877	2.75356	2.81517	2.66105	1.92767	2.29419	2.9097	3.20518	2.49432	1.65911	2.16644	2.63105	2.36817	2.25021	2.42189	2.53981	2.65664	1.89663	1.72793	2.4951	2.21072	2.05611	2.44939	1.71251	2.41309	2.79844	1.3433	1.91757	2.41309	2.41553	1.788	1.47565	1.67815	2.09836	3.02627	1.75938	0.610826
hsa-miR-144-5p	2.41321	1.95426	2.05389	2.15042	1.77886	1.5657	1.62111	1.17902	2.99874	1.75413	1.77886	1.99974	1.62111	1.50228	2.18944	1.95416	1.30358	1.84554	2.3441	2.72662	1.74121	1.45426	1.52457	2.26196	1.71417	1.77875	1.81348	2.58304	1.99257	1.76667	1.5658	1.91212	1.40001	1.84554	2.02095	1.12807	1.87528	2.88663	1.40001	1.90331	1.86556	2.26598	1.63797	1.26594	1.12807	1.54568	2.10211	1.30348	1.22471
hsa-miR-145-3p	1.5755	2.09936	1.52588	1.86607	1.75192	1.73755	1.5755	1.62349	1.655	1.73556	1.79751	1.89581	1.96264	1.3603	1.89383	1.79223	1.69169	2.03441	2.06047	1.85986	1.9675	1.5239	1.70084	2.16689	2.12347	1.77731	1.75192	1.8254	1.59912	2.07003	1.24269	1.7995	2.11871	1.75192	1.66302	1.95473	1.82059	1.44911	1.38007	1.5755	1.86607	2.07381	1.90152	1.26847	1.58946	2.03027	1.70084	2.01524	1.26847
hsa-miR-146a-5p	4.35934	3.36926	3.44774	2.97232	3.4019	3.60352	3.19279	3.15302	3.74296	3.3946	3.41058	3.68399	3.36823	2.55059	3.55294	3.32106	2.38002	3.63616	3.20963	3.20694	2.98172	3.25662	3.45421	3.19723	3.45421	3.30106	3.41225	3.15794	3.08997	3.29955	3.08602	3.50458	3.13498	3.1178	3.16195	3.15742	3.10829	3.2739	2.8525	3.21396	3.27653	3.31265	3.13604	2.93408	3.12855	3.16725	3.15422	2.95971	3.33548
hsa-miR-146b-5p	3.35754	2.89081	2.92007	2.80973	2.94006	3.1499	2.90159	3.01127	2.9195	2.9877	3.01907	3.07609	2.9302	2.45739	3.12375	3.10186	2.13864	2.90395	3.01173	3.09318	2.92519	2.8105	3.23725	2.74364	3.29125	2.87219	2.87914	3.00855	2.87539	2.78267	2.51849	3.21329	2.80459	2.91441	2.79113	2.957	2.98766	3.05586	2.45079	2.81988	3.14755	2.7083	2.96063	2.64066	2.86001	2.95757	2.77245	2.68846	2.75293
hsa-miR-148a-3p	4.24412	4.72906	4.21643	4.62314	4.27974	4.22339	4.24151	3.88804	4.46152	4.32231	4.34061	4.40604	4.44098	4.20425	4.49902	4.37611	3.91424	4.30788	4.7057	4.31638	4.53857	3.98518	4.51443	4.59817	4.44978	4.03156	4.19347	4.22659	4.16867	4.29669	4.00045	4.14232	4.66364	4.19218	3.89223	4.28136	4.2006	4.06896	3.72599	3.94932	4.32857	4.57373	4.5544	3.74212	4.21052	4.19943	4.30274	3.91979	3.37601
hsa-miR-148a-5p	1.60144	1.71252	1.38025	1.5533	1.26952	1.5533	1.29392	0.825733	1.31769	1.37956	1.45086	1.49816	1.45086	0.652685	1.4167	1.39923	0.890829	1.56535	1.6246	1.48318	1.63471	1.12087	1.82858	1.75551	1.72132	1.15572	1.52593	1.33888	1.39853	1.39853	1.15503	1.31769	1.6246	1.43412	1.18666	1.49816	1.29461	1.15503	0.948513	1.18666	1.5533	1.63471	1.77901	1.2161	1.2168	1.33888	1.18666	1.08443	0.947819
hsa-miR-148b-3p	3.03078	3.21291	2.79614	3.21001	2.93416	2.79853	2.82427	2.64563	3.11787	2.90431	2.93646	2.96302	2.85589	2.90964	3.01723	2.98046	2.63371	2.74765	3.03073	2.9742	2.77698	2.6302	2.96261	2.83718	2.99979	2.60518	2.88144	2.61342	2.94046	2.75032	2.55027	2.67734	3.07941	2.83166	2.77026	2.63413	2.84932	2.78441	2.29153	2.63255	2.88446	2.88079	2.83061	2.33085	2.64789	2.62903	2.92542	2.46803	2.20171
hsa-miR-150-5p	2.18257	1.20089	1.79725	1.04522	1.50903	1.89174	1.5514	2.04267	1.28483	1.6742	1.62566	1.86242	1.95873	0.976694	2.03299	1.69216	0.793555	1.9338	1.73453	1.7854	1.35047	1.60822	1.77032	1.70674	1.95873	2.03588	1.6586	2.2504	1.6586	1.04233	1.40983	1.91027	0.796446	2.07846	1.40983	1.91027	1.79725	2.22003	1.46508	2.0191	1.66149	1.46219	1.41272	1.59008	1.28483	2.21552	1.6742	1.94515	1.77032
hsa-miR-151a-3p	3.61653	3.71129	3.26359	3.4065	3.69926	3.80858	3.67398	3.50438	3.07081	3.5979	3.68732	3.74741	3.33404	3.08317	3.59062	3.65861	3.15012	3.35147	3.14838	3.50561	3.23821	3.54262	3.83666	3.45571	3.49997	3.16737	3.54087	3.37644	3.53705	3.28998	3.12497	3.30868	3.04272	3.44845	3.19846	3.45958	3.45243	3.61044	3.1659	3.4074	3.4666	2.91694	3.52569	3.39962	3.54426	3.48406	3.35734	3.04919	3.37674
hsa-miR-152-3p	2.13613	2.10246	2.03713	1.73827	2.13342	2.2438	1.90563	1.85744	2.0762	2.0595	2.06907	2.42562	2.07534	1.27684	2.23231	2.09744	0.914854	2.1252	2.07308	1.88267	2.05626	1.61936	1.77047	1.73134	2.09361	1.76492	1.86175	1.48136	1.67057	1.67853	1.60083	2.0762	1.92016	1.42801	1.90097	1.84155	1.70244	1.31476	1.55148	1.64573	1.92016	1.45552	1.70244	1.3503	1.84155	1.83527	1.68636	1.51825	1.53983
hsa-miR-155-5p	2.01141	1.79275	1.99875	1.42313	1.79275	2.16233	1.6688	2.16233	1.66862	1.93551	2.01549	2.05415	1.94036	1.29693	1.96837	1.90506	1.40736	2.0506	2.01123	2.01531	2.11338	1.84367	1.83149	1.81237	2.01953	2.00711	1.54557	1.70322	1.60118	1.72738	1.17782	1.87255	1.6409	1.27571	1.75027	1.55709	1.63126	1.62158	1.45339	1.60118	1.87255	1.42331	1.63126	1.35569	1.46778	1.84367	1.3908	1.5083	1.80605
hsa-miR-181a-2-3p	1.56351	1.59802	1.62955	1.3307	1.47028	1.62955	1.55136	1.75359	1.40588	1.60894	1.45515	1.46987	1.53887	1.5976	1.51273	1.5976	1.78375	1.47028	1.26424	1.5864	1.59802	1.53887	1.60894	1.52558	1.76164	1.91272	1.56351	1.87417	1.87417	1.4849	1.21388	1.53845	1.38828	1.95375	1.55136	1.66878	1.55095	1.94888	1.3307	1.82484	1.6397	1.28797	1.73791	1.57532	1.40588	1.79088	1.66919	1.61916	1.26466
hsa-miR-181a-5p	3.24406	3.08495	3.02497	2.96999	2.78645	2.7769	2.91781	2.97245	3.13626	3.00622	2.90361	2.98549	2.92281	2.80041	2.87491	2.92362	2.83402	3.114	2.92251	2.87708	2.87676	2.95317	2.92775	3.08727	3.01474	2.92141	2.69193	2.94171	2.8972	2.87367	2.43605	2.61889	2.99676	2.9786	2.95929	3.08765	2.76262	2.92611	2.30553	2.87243	2.95696	2.85593	2.87831	2.5635	2.59196	2.88651	3.1244	2.86775	2.42541
hsa-miR-181b-5p	2.39452	2.18714	2.41666	2.0242	1.95711	1.93059	2.02452	2.32613	2.28801	2.17288	1.97618	2.23609	2.149	1.77277	2.05259	2.29022	1.64444	2.29294	2.47569	2.14353	2.36639	1.92674	1.98993	2.15895	2.23224	2.33414	1.87657	1.92674	1.8584	2.07153	1.64444	1.96095	2.19655	1.93711	2.17288	2.24602	1.89782	1.90519	1.61595	1.88246	2.07538	1.9422	2.0027	1.52511	1.8095	2.01614	2.16704	1.96581	1.67444
hsa-miR-181d-5p	1.60294	1.52462	1.2131	1.26237	1.4124	1.32686	1.23466	1.52842	1.26237	1.47227	1.45808	1.55233	1.32306	0.343201	1.4124	1.68976	0.629368	1.42819	1.60674	1.23846	1.28119	1.1823	1.08895	1.48978	1.45808	1.69804	1.15344	1.05255	0.968605	1.48598	0.629368	1.01648	1.58582	0.968605	1.39599	1.4162	0.867271	0.722716	0.923131	1.01268	1.34632	1.4124	1.30644	0.339403	1.2131	1.37892	0.968605	1.09275	1.01268
hsa-miR-182-5p	2.9112	2.91358	2.71799	2.75353	2.21346	2.19537	2.59383	2.4267	3.28184	2.31715	2.51605	2.80954	2.56065	2.07321	2.80443	2.32836	2.28606	2.44794	3.07761	3.00937	3.01711	2.38543	2.15405	2.67525	2.38543	2.60814	2.47615	2.98859	2.65348	2.62809	2.50113	2.86783	2.43911	2.68152	2.51458	1.97933	2.65543	3.67035	2.29325	2.558	2.47112	2.69441	2.38128	2.39327	1.95367	2.40665	2.7191	2.33284	2.39132
hsa-miR-183-5p	2.66619	2.70448	2.47285	2.54961	2.06264	2.11082	2.51962	2.51964	2.78762	2.14722	2.32282	2.51964	2.31578	2.33432	2.56981	2.25217	2.46954	2.17757	2.86869	2.98797	2.72886	2.32745	2.43501	2.60762	2.24106	2.50152	2.49686	2.92028	2.75795	2.40718	2.54683	2.68978	2.18404	2.88424	2.32282	1.8996	2.79862	3.52691	2.11835	2.50151	2.49218	2.3499	2.22967	2.5815	1.95198	2.55508	2.71118	2.41101	2.29889
hsa-miR-185-3p	1.30857	1.4502	1.17608	0.75028	1.17802	1.35932	1.21464	0.458519	1.55405	1.21464	1.24833	1.35932	1.09355	0.629188	1.40807	0.920949	1.17802	1.24833	0.985834	1.2464	1.09355	0.922882	1.24833	0.75028	1.21464	1.21271	1.24833	1.40807	1.40807	1.17802	1.27953	1.21271	0.844206	1.4502	1.27953	0.920949	1.21271	1.4502	0.75028	1.09355	1.21271	1.30857	0.985834	1.04397	1.09162	0.922882	1.30857	0.844206	1.09355
hsa-miR-185-5p	3.34894	3.74348	3.52105	2.9574	3.28529	3.34582	3.38066	2.93072	3.51799	3.39514	3.2963	3.48195	3.31985	2.56427	3.56551	3.33306	2.77799	3.3424	3.34291	3.47468	2.97669	3.15888	3.00668	2.67545	3.13296	2.60326	2.95424	3.07812	3.4005	3.01412	3.31467	3.15502	3.14	3.06052	3.21769	2.55664	2.81018	2.98748	2.4955	2.64574	3.04269	3.42108	2.45058	2.62656	2.69481	2.5571	3.6617	2.15104	2.71485
hsa-miR-186-5p	2.86103	2.80656	2.45949	2.35227	2.20581	2.27572	2.36341	2.25341	2.92696	2.17541	2.32361	2.36505	2.19466	2.24011	2.64288	2.3255	2.13838	2.38078	2.31145	2.71759	2.28583	2.29187	2.78076	2.57683	2.75025	2.3057	2.70847	2.84254	3.13252	2.36341	2.46038	2.42594	2.33641	3.13501	2.44603	2.40811	2.7693	3.1203	1.97136	2.46837	2.79389	2.90079	2.51606	2.5443	2.27882	2.59276	3.02961	2.12881	2.12083
hsa-miR-191-5p	2.81701	3.12597	2.97483	2.95147	3.22338	3.33322	3.13046	2.9508	3.04008	3.2426	3.227	3.42479	3.21753	2.73737	3.3131	3.16752	2.76091	3.268	2.91327	3.17204	3.02306	3.14366	3.04029	3.01476	3.30132	3.00893	2.96057	3.25565	3.13711	3.2398	2.91328	3.13678	3.029	3.21122	3.17467	3.13144	2.88485	3.33007	2.79269	3.01965	3.18294	3.02869	3.02165	2.9573	2.97861	2.99681	3.12911	2.72434	3.0859
hsa-miR-192-5p	2.94426	3.04555	2.77367	2.83928	2.51203	2.47998	2.84758	2.6279	3.13523	2.74552	2.66743	2.54054	2.71248	2.83386	2.92462	2.53897	2.46593	2.71455	2.85364	3.14573	3.29209	2.38107	3.14567	2.61498	2.8558	2.5634	2.94666	2.81948	3.12357	2.3299	2.37877	2.59206	2.66906	2.8235	2.58997	2.45577	2.9652	2.95899	1.99458	2.51704	2.98031	2.53649	2.89935	2.42872	2.80484	2.87604	3.00915	3.30885	1.91987
hsa-miR-193a-5p	1.70603	2.22803	1.81025	1.48566	1.56859	1.87374	1.71384	1.89474	1.2053	1.77173	1.86874	1.94323	1.94364	1.02656	2.19555	1.58918	1.78509	2.2058	2.07688	1.77132	2.13742	1.77173	1.85772	1.82249	2.067	2.03044	1.77173	1.91026	1.87415	2.0346	1.33252	2.00723	1.82249	1.88999	1.64717	1.9478	1.71343	1.36781	1.31335	1.45934	1.97425	2.07729	2.13702	1.45934	1.67296	1.90024	1.81065	1.57881	1.74373
hsa-miR-194-5p	2.3276	2.28182	1.98656	2.07661	1.6732	1.66352	2.19276	1.78062	2.40139	1.92836	1.96336	1.81579	1.81597	2.20921	2.1322	1.78062	2.37645	1.90701	2.02569	2.27702	2.11564	2.00018	2.47952	1.86671	1.99574	1.84831	2.20939	2.05012	2.31288	1.31312	1.83578	1.59042	1.81579	2.25331	1.82928	1.67302	2.19258	2.22278	0.967726	1.86085	2.28164	1.99574	2.09114	1.88454	1.98198	2.0341	2.5198	2.45231	1.01346
hsa-miR-197-3p	0.844969	1.39299	0.748672	0.84414	1.25377	1.54949	1.39299	1.14069	0.155574	1.21952	1.1823	1.28464	1.45894	0.84414	1.25377	1.14069	0.452953	1.56646	0.84414	0.84414	0.156404	1.41612	1.28547	1.21869	1.62557	1.04522	1.25377	1.67749	1.39299	1.47884	1.14152	0.988093	0.748672	1.3426	0.749502	0.988093	1.39216	1.04605	1.04522	1.14152	1.43724	1.1823	1.39216	1.39299	1.21869	1.70126	1.09644	0.988093	1.28547
hsa-miR-199a-3p	2.38836	2.3446	1.79697	2.05536	2.27362	2.20592	2.0691	1.71134	2.38641	2.30661	2.36357	2.55545	2.19208	1.54679	2.34217	2.18887	1.21548	2.53229	2.40368	2.16379	2.15234	1.97738	2.27075	2.20257	2.33972	1.99434	2.06449	1.84562	1.81364	2.209	1.65497	2.02082	2.26811	1.71109	2.03571	1.86101	1.95431	1.76074	1.57656	1.6668	2.19577	2.30661	2.03596	1.56168	1.95431	1.97167	1.9419	1.44273	1.53084
hsa-miR-199a-5p	2.21285	1.95685	1.75458	2.15237	2.38039	2.36498	2.35158	2.12647	1.85671	2.3584	2.43292	2.58983	2.00453	1.6333	2.35614	2.34219	1.22266	2.03835	1.95109	2.2	1.78046	2.1111	2.2981	2.13776	2.57503	2.04285	2.26595	1.71786	1.80479	2.30579	1.51399	2.00939	2.02404	1.58428	2.21908	2.16302	2.16651	1.93974	1.6333	2.01934	2.47972	1.77204	2.29277	1.8774	2.24882	2.06977	1.77204	1.67753	1.94552
hsa-miR-199b-3p	2.2871	2.24148	1.67194	1.97004	2.18017	2.09235	2.00752	1.6241	2.35032	2.2199	2.24148	2.43299	2.14776	1.4743	2.21353	2.07497	1.13836	2.4345	2.30863	2.05686	1.98628	1.94036	2.19045	2.15926	2.20049	1.86838	1.96393	1.74424	1.62368	2.11675	1.59761	1.89613	2.25083	1.64827	1.96393	1.79848	1.89613	1.63615	1.39589	1.54018	2.10906	2.18705	1.91584	1.41646	1.74465	1.92807	1.83054	1.4743	1.43646
hsa-miR-200a-3p	1.3205	1.52377	0.280568	0.280568	0.572589	1.24315	1.37292	2.19251	0.750303	1.07655	0.868958	1.42396	0.919319	-0.0158009	1.48762	1.9446	0.868958	0.919319	2.07194	1.16968	0.919319	0.745954	2.57749	1.30584	1.47485	1.46605	1.83154	1.37292	1.19125	0.27622	0.572589	2.26016	1.32484	1.16533	0.667999	1.16968	1.63041	1.50001	-0.0158009	1.00512	2.53295	0.745954	1.32484	1.16533	1.37727	1.68542	1.23881	1.79458	-0.0201496
hsa-miR-200c-3p	1.00058	1.5823	0.812133	0.979298	0.908582	1.32862	1.03987	1.86961	0.644967	1.10875	0.908582	1.68627	0.85353	0.0734259	1.55097	2.33126	0.0512698	1.10875	2.3243	0.979298	0.85353	0.908582	1.03987	1.26507	1.07575	1.30851	0.957142	1.28635	0.714809	0.85353	0.337041	2.8152	2.17348	0.714809	0.908582	1.38367	1.84791	0.85353	1.0979	1.10875	2.73542	0.504206	1.21651	0.337041	1.26507	0.85353	1.03987	2.08651	1.1393
hsa-miR-203a	1.40629	1.68737	1.33162	1.20087	1.24304	1.34747	1.3634	1.68673	1.40565	1.76562	1.68737	1.6722	1.85683	1.77675	1.40629	1.72105	1.55483	0.899515	2.18403	1.88882	2.32404	0.500294	1.04611	1.34747	1.71505	1.33162	1.13071	1.58295	1.45761	1.43271	0.744114	1.7709	1.83128	0.597516	1.49248	2.05179	1.84141	1.22277	1.39181	1.33227	1.76497	1.15561	1.26176	0.744114	0.801646	1.48117	1.01383	1.60872	0.899515
hsa-miR-215-5p	1.56713	1.5756	1.53276	1.28379	1.5756	1.62442	1.92958	2.05264	1.31667	2.07926	1.40058	1.2089	1.99188	1.24805	1.29918	1.67363	0.997699	1.92243	1.34711	1.5934	1.54965	1.20752	1.7162	1.80803	2.03789	2.0169	1.89255	1.52195	1.52195	1.18646	1.14077	1.37545	1.60921	1.20752	1.5756	1.72348	1.99326	1.82534	1.31667	1.28241	1.6802	1.22757	1.14214	1.06102	1.79837	1.82075	2.37008	2.2414	0.546435
hsa-miR-221-3p	2.89	2.55975	2.40721	2.25816	2.52808	2.67239	2.40476	2.38367	2.67975	2.55327	2.68684	2.73451	2.44434	2.02834	2.66852	2.72476	2.07024	2.76636	2.58335	2.54685	2.48443	2.34824	2.65327	2.54185	2.58624	2.67363	2.42059	2.2801	2.34029	2.51043	2.20281	2.6469	2.43386	2.21729	2.55975	2.48839	2.31282	2.36372	2.16044	2.36624	2.53848	2.40476	2.42953	2.09458	2.28332	2.21729	2.36372	2.1087	2.34296
hsa-miR-222-3p	2.70793	2.37064	2.12727	2.06671	2.06189	2.19377	2.18344	2.01154	2.29252	2.26243	2.14165	2.16697	2.23368	2.18057	2.26243	2.48765	2.34595	2.36182	2.34643	2.43602	2.38355	2.16994	2.44117	2.41278	2.3961	2.43602	2.19654	2.32225	2.30488	2.31981	2.02075	2.16351	2.21287	2.4063	2.09956	2.32997	2.22817	2.29722	1.81091	2.3074	2.38403	2.2307	2.19051	1.98589	1.91942	2.2707	2.2652	1.97055	1.9424
hsa-miR-223-3p	1.89803	2.49872	1.45791	2.27231	1.89803	1.94487	1.87779	1.50915	2.04726	1.89803	2.08099	2.30065	2.08743	1.20757	2.44591	1.85658	0.951815	2.28058	2.0938	1.66915	2.18452	2.04017	2.42581	2.19466	2.53678	1.68557	2.19961	2.24644	2.02566	2.51817	1.89803	1.90782	2.41691	2.29273	2.03298	2.32726	1.94487	2.03298	1.63432	1.85656	2.18963	2.9658	2.50368	2.03298	2.0938	2.1183	2.0678	1.90782	1.59645
hsa-miR-223-5p	2.76747	3.26805	2.56652	2.82942	2.83004	2.96661	2.73009	2.54368	2.55296	2.8134	2.88315	2.93147	2.97134	2.03426	3.10062	2.78257	2.13023	3.006	2.8946	2.57796	2.90249	2.85692	2.97314	3.20456	3.2462	2.58825	2.80091	3.01623	2.82054	3.20095	2.40502	2.74419	3.00389	3.00534	2.67621	3.0788	2.83434	2.63143	2.61938	2.5851	3.02223	3.3064	3.29392	2.6109	2.90723	3.16856	2.7453	2.38957	2.62365
hsa-miR-224-5p	1.08048	1.23417	1.00012	0.901654	1.57735	1.42176	1.17894	1.56536	0.774709	0.842635	1.52686	1.76813	1.40435	0.468845	1.48481	1.87122	0.289831	1.23417	0.842731	1.11589	1.1485	1.2594	1.62265	1.36766	1.43831	1.00012	1.48481	1.23417	1.17894	1.36756	1.20742	1.00012	1.11589	0.774614	1.28325	1.28335	1.20752	1.08048	0.774709	1.1485	1.79077	0.595695	1.62274	1.30589	1.72762	1.20742	0.842635	1.28335	1.67342
hsa-miR-320a	3.96523	3.79166	4.19406	3.85823	3.81804	3.80933	4.00159	4.29464	3.51701	3.94178	3.84329	3.65794	3.98088	3.90654	3.66162	3.99748	4.28335	3.64955	3.93893	4.18782	4.23685	3.83364	3.72402	3.7902	3.7007	4.07858	3.6086	3.71456	3.95308	3.79327	3.80681	3.68799	3.94719	3.86342	4.25258	3.87945	3.47525	3.57711	3.48162	3.94191	3.77442	3.63765	3.47801	3.59998	3.31267	3.49619	4.11544	3.88042	3.83568
hsa-miR-320b	2.58245	2.34508	2.77462	2.51706	2.26667	2.32018	2.59557	3.41071	2.12802	2.49502	2.44545	2.22052	2.56989	2.72217	2.30311	2.78246	3.09657	2.31579	3.26129	2.99053	2.99555	2.49502	2.44807	2.60094	2.4155	3.37877	2.37404	2.55593	2.68361	2.39969	2.35496	2.64778	2.59447	2.65169	2.89309	2.69733	2.37665	2.38327	2.14446	2.70625	2.63528	2.33497	2.40376	2.31579	2.1021	2.4321	2.91539	2.72354	2.44281
hsa-miR-320c	1.87601	1.6152	2.07509	1.87726	1.60592	1.60718	1.82265	2.96101	1.34398	1.76175	1.71336	1.4767	1.84479	2.17394	1.6152	2.20322	2.44987	1.66706	2.93885	2.41802	2.36824	1.68305	1.81114	2.03869	1.79931	2.99547	1.69847	1.9144	1.89563	1.73477	1.53467	2.11159	1.92922	1.86068	2.08325	2.1145	1.78841	1.6152	1.5132	1.96217	2.07825	1.52345	1.84605	1.47544	1.52471	1.92349	2.15727	2.02465	1.78715
hsa-miR-320d	1.59489	1.17829	1.72934	1.39113	1.29645	1.15707	1.27887	2.54202	1.04886	1.36035	1.29645	1.18035	1.41599	1.53201	1.17829	1.83543	1.6944	1.0149	2.29333	1.84521	2.00297	1.22138	1.20037	1.45551	1.38907	2.34481	1.1304	1.46525	1.34524	1.42884	0.942969	1.48997	1.55158	1.17829	1.51982	1.66085	1.24347	1.0468	1.10635	1.32959	1.48997	1.1043	1.37701	0.901933	1.20243	1.46525	1.46525	1.3473	1.41599
hsa-miR-323a-3p	1.34908	1.00041	0.468848	0.843545	1.08103	1.18058	1.08103	1.20912	-0.0169867	0.288673	1.52839	0.468848	0.901728	1.3078	1.11643	0.902596	-0.0178544	1.54159	1.18058	0.596068	1.23507	0.774508	1.23507	1.1173	1.52839	0.902596	1.38756	1.1492	1.04256	1.08103	0.46798	0.596068	0.289541	0.901728	1.51478	0.775375	0.954682	0.953815	1.28512	1.40561	1.3078	-0.0178544	0.954682	0.69388	0.775375	1.08103	1.17971	0.468848	1.76226
hsa-miR-323b-3p	1.57263	0.513112	1.14354	0.884287	1.42101	1.59936	1.13777	1.69991	0.619434	1.0776	1.50317	1.19661	1.13777	1.69991	1.47741	0.701587	0.765271	1.77629	1.14354	0.701587	1.50317	0.613659	1.00814	1.3957	1.67744	1.04998	1.57263	1.42101	1.10869	1.50317	0.925987	0.931762	0.771047	1.00814	1.90592	0.884287	1.32624	1.2152	1.60949	2.02649	1.04998	0.200785	1.17086	0.513112	1.17086	1.28126	0.82544	0.619434	1.91604
hsa-miR-328-3p	1.02831	1.63107	1.54814	1.02587	2.24811	2.50467	2.09996	2.21266	0.693705	2.08775	2.13737	2.20573	1.78949	1.91604	1.83701	2.14848	2.15622	2.35258	1.62863	1.72628	0.988158	1.99063	1.76356	1.79945	1.84259	1.74753	1.80189	1.71394	1.6662	1.55058	1.649	1.84566	1.02587	1.58259	1.72872	1.37174	1.68831	1.4066	1.93857	1.59274	1.9252	1.02831	1.40417	1.80795	1.81738	1.99452	1.49114	1.35454	2.38285
hsa-miR-330-3p	1.62941	1.61899	1.44009	1.45545	1.87704	2.04824	1.58622	1.87061	1.1414	1.89458	1.65929	1.9964	1.60833	1.39062	1.76232	1.75415	0.64406	1.74669	1.6684	1.53806	1.51259	1.67817	1.79917	1.62898	1.8062	1.40772	1.48512	1.45588	1.29427	1.6963	1.04072	1.40772	1.37285	1.22443	1.48512	1.64912	1.17064	1.11056	1.27174	1.40814	1.76951	1.17107	1.65887	1.42462	1.56256	1.61899	1.04072	1.1414	1.76232
hsa-miR-335-3p	1.16774	1.13773	1.07077	1.10559	1.70853	1.85618	1.74077	1.45461	0.291363	1.75603	1.79885	1.74856	1.29289	1.16784	1.53632	1.61572	1.07068	1.40701	0.769256	1.40711	1.13773	1.35368	1.38995	1.35378	1.74847	1.33444	1.1055	1.24705	1.07068	1.43925	0.836215	1.31421	0.467739	0.689851	1.22219	1.10559	1.24715	0.991368	1.16784	1.46926	1.51082	-0.0102507	1.64573	1.27057	1.65529	1.54857	0.991368	0.59288	1.5944
hsa-miR-335-5p	1.51684	1.52795	1.52108	1.28516	1.56964	1.47342	1.23924	1.35778	1.80979	1.57944	1.5596	1.74932	1.53877	1.24348	1.68196	1.65474	1.44314	1.57944	1.97867	1.43373	1.62525	1.01159	1.33654	1.14501	1.33654	1.64649	1.14078	0.683182	0.928008	1.14078	0.928008	1.61176	1.67855	0.971892	1.61648	1.1719	1.08541	0.971892	0.883186	1.04783	1.24348	1.16766	1.14501	0.470413	1.11628	0.590238	1.66653	0.932245	0.82333
hsa-miR-338-5p	1.57285	1.76182	1.45946	1.65201	1.72828	1.74508	1.25815	1.59677	1.30633	1.88719	1.76182	1.93281	1.90498	0.871183	2.02154	1.68208	0.0234683	2.13792	2.22384	1.66226	2.14802	1.66255	1.4756	2.00309	1.92762	1.84233	1.38988	1.69194	1.35023	2.19526	1.37051	1.84233	1.95923	1.53379	1.71948	1.86199	1.57256	1.17354	1.47531	1.4756	1.74508	2.05161	1.90469	1.28306	1.47531	1.71049	1.62	1.32868	1.72828
hsa-miR-339-3p	2.00712	1.39663	1.54013	1.62342	1.54098	1.61061	1.6367	1.17665	1.65969	1.55603	1.47485	1.32607	1.6367	1.82975	1.47485	1.50834	1.75394	1.47485	1.50834	1.74366	1.27322	1.32692	1.64878	1.64794	1.41756	1.13933	1.45659	1.58464	1.66054	1.47485	1.78104	1.35059	1.32607	1.7722	1.32692	1.65969	1.474	1.52537	1.00271	1.47485	1.52453	1.30091	1.32607	1.37463	1.09844	1.1775	1.83059	1.27238	1.32692
hsa-miR-340-3p	1.03753	1.14309	1.20134	1.22788	1.37904	1.68226	1.41408	1.54399	0.949474	1.47672	1.49108	1.66363	1.39691	0.897914	1.61346	1.61326	0.468762	1.34095	1.43039	1.47651	1.25311	1.41408	1.14309	1.47651	1.55653	0.949474	1.03753	0.898122	1.03753	1.22809	0.29127	1.2529	0.949474	0.594696	1.11065	1.22788	0.897914	1.07561	0.771981	0.995803	1.44631	0.468762	1.34074	0.692377	1.14289	1.1733	0.692377	0.897914	1.1733
hsa-miR-340-5p	2.13869	2.5112	2.1861	2.38893	2.1903	2.1705	2.18417	1.88016	2.58808	2.35796	2.4728	2.51736	2.3723	2.12365	2.58426	2.58187	1.33745	2.36003	2.60973	2.32218	2.3096	2.03504	2.4254	2.31765	2.73134	2.09067	2.34742	1.95456	2.23098	2.26051	1.71144	2.34841	2.64794	1.77819	2.49011	2.09445	2.23536	2.01285	1.60955	1.94405	2.48118	2.30493	2.27467	1.62186	2.15762	2.06836	2.4412	1.91549	1.43172
hsa-miR-342-5p	2.84576	1.59839	2.17368	1.77483	1.65431	1.84177	1.78183	2.14135	2.06497	1.85881	1.68791	1.50979	2.00442	1.34825	1.69592	1.87431	1.99269	1.48506	1.56696	2.09717	1.71906	1.83082	1.90011	1.89965	2.04135	2.02649	1.76192	2.08505	1.90501	1.63647	1.42974	1.47142	1.67098	2.10073	1.45829	2.17627	1.74056	2.14461	1.33002	2.20421	1.8361	1.89016	1.71102	1.51025	1.50979	1.93325	1.94226	1.74056	1.52231
hsa-miR-345-5p	1.5472	1.49757	1.35103	1.08301	1.23918	1.26921	1.42073	1.47843	1.23798	1.23918	1.23918	1.03337	1.32669	1.32549	1.35224	0.912132	1.42073	1.5472	1.35103	1.23798	0.913336	1.27041	1.57732	1.5904	1.44129	1.03337	1.35224	1.42073	1.56253	1.56253	1.20545	1.23798	1.12741	1.60542	1.29949	1.45969	1.37512	1.4609	0.835296	1.27041	1.44009	1.5313	1.44009	1.16878	1.08301	1.23918	1.59161	0.977096	1.12861
hsa-miR-361-3p	2.95608	2.47506	2.44552	2.23798	2.37454	2.3837	2.3117	2.37437	2.26795	2.32034	2.37642	2.49958	2.27767	2.03338	2.48394	2.37999	2.21694	2.31388	2.27036	2.60437	2.46904	2.32881	2.63655	2.40705	2.56635	2.42921	2.38202	2.59784	2.51228	2.26812	1.98526	2.20854	1.94623	2.66636	2.12325	2.51211	2.29371	2.60565	1.92005	2.40897	2.43087	2.2657	2.51348	2.27292	2.20297	2.45985	2.36307	2.27036	2.20032
hsa-miR-361-5p	1.65171	1.47038	1.43245	1.32798	1.61591	1.50139	1.28038	1.71357	1.48512	1.56324	1.41556	1.53224	1.62816	1.15827	1.577	1.53224	1.0857	1.91329	1.936	1.63796	1.47038	1.47038	1.28038	1.57486	1.45284	1.63796	1.16041	1.39568	1.28038	1.60331	1.0857	1.51708	1.50139	1.2244	1.53438	1.53224	1.32798	1.0857	0.993825	1.37487	1.3038	1.61591	1.32798	0.883573	0.941153	1.53438	1.45284	1.27824	0.995961
hsa-miR-363-3p	3.05221	2.88563	2.87503	2.90672	2.43424	2.43151	2.80874	2.42036	3.28823	2.48964	2.58116	2.5664	2.60682	2.8305	2.96248	2.70527	2.92157	2.57332	2.82701	3.1958	2.54551	2.54381	2.74044	2.7895	2.40712	2.60481	2.60535	3.00623	3.01932	2.37316	2.54041	2.50977	2.45506	3.17853	2.63926	2.43806	2.6714	3.28334	1.91104	2.72957	2.69348	2.62685	2.4181	2.55553	2.02137	2.56045	3.00041	2.39236	1.96704
hsa-miR-370-3p	1.83832	1.59334	1.34794	1.77259	1.75186	2.21678	1.66822	2.20994	0.831274	1.5197	2.33855	1.78165	1.72229	1.21106	2.1867	1.41366	0.829221	2.07199	1.67028	1.21106	1.93677	1.48648	1.77054	1.76335	2.4313	1.06024	1.93041	1.83039	1.4506	2.00676	0.747499	1.10296	1.47095	1.10091	1.80571	1.60878	1.79923	1.5197	1.56737	1.92396	2.02473	0.747499	1.69269	1.13991	1.68162	1.65658	1.48648	1.10296	2.07199
hsa-miR-374a-5p	1.56911	1.25726	1.28057	1.44601	1.25726	1.16751	1.06141	0.603885	2.0825	1.06141	1.33038	1.55327	1.28298	0.704278	1.49755	1.34993	0.706686	1.10056	1.6827	1.7912	1.65334	0.788712	1.33038	1.28057	1.37326	1.05901	1.16991	1.5128	1.13657	1.10056	0.294445	1.39085	1.05901	1.13657	1.28298	0.786305	1.13416	1.90668	0.292037	0.971132	1.42837	1.4654	1.05901	0.606293	0.915733	1.13657	1.44842	0.704278	0.294445
hsa-miR-375	1.95601	1.86186	1.59469	1.12316	2.07458	2.57153	2.40984	2.56686	0.454396	2.19247	1.73021	1.07542	1.85368	2.32843	1.27487	1.93854	1.65851	2.24696	1.84446	1.60216	1.52182	1.99335	2.01373	1.95836	2.28787	2.1645	2.26632	2.20539	1.94614	1.33417	1.37382	1.87294	1.16612	1.95275	1.78198	2.07859	2.47089	2.15324	1.77122	1.89683	2.32979	1.16701	2.09767	2.22494	2.28547	2.76139	2.25513	2.20268	1.49412
hsa-miR-378a-3p	3.11193	3.19731	3.17607	2.77919	2.84083	2.87999	2.77908	2.96725	3.16262	3.04912	2.88951	3.00317	3.1237	2.65892	3.09789	2.82831	2.43163	3.07489	3.12228	3.06948	3.04803	2.59424	3.0079	2.95518	2.84142	2.54156	2.76374	2.72043	2.81139	3.00185	2.64591	2.90571	2.87783	2.79784	3.02939	2.7134	2.81843	2.63356	2.47298	2.57034	2.76242	2.74263	2.88909	2.27004	2.50541	2.75945	2.9776	2.77987	2.44682
hsa-miR-378c	1.75283	1.86493	1.88251	1.41237	1.37655	1.33864	1.37655	1.61111	2.16433	1.61055	1.50277	1.6793	1.72149	1.3951	1.67874	1.48946	1.19581	1.72955	1.92984	1.78955	1.80929	1.19581	1.44435	1.37711	1.35776	1.10201	1.24873	1.06466	1.29576	1.35776	1.31745	1.47513	1.58942	1.2729	1.75283	1.13585	1.33864	1.10145	0.930557	1.1353	1.33864	1.42839	1.29632	0.636903	0.930557	1.29576	1.62099	1.35831	0.979805
hsa-miR-379-5p	1.49548	1.23683	1.21431	1.51932	1.6128	1.84137	1.60334	1.61286	0.931873	1.48308	2.08677	1.64008	1.62207	1.16537	1.93164	1.21431	-0.0814054	1.79433	1.68995	1.0121	1.38489	1.27877	1.21426	1.31711	2.29795	0.774922	1.62207	1.21426	1.13864	1.62207	0.707035	1.21431	1.31711	0.223605	1.88376	1.29838	1.77539	1.23683	1.35233	1.63114	1.79439	0.707035	1.40038	0.402025	1.57372	1.41525	1.33502	1.16537	1.64874
hsa-miR-381-3p	1.9302	1.63128	1.2828	2.0808	1.93999	1.9643	1.93512	2.02434	1.23822	1.56904	2.32011	1.77209	1.61149	1.68662	1.99029	1.52285	-0.0738861	2.08358	1.84376	1.23822	1.80536	1.67724	2.09398	1.82533	2.31179	0.905433	1.68589	1.54619	1.28206	1.61149	0.724113	1.03356	1.5103	1.28206	1.80536	1.56977	1.85564	1.56904	1.36045	1.92523	1.82533	0.642912	1.44165	1.03282	1.69511	1.37718	1.67724	1.18868	1.74213
hsa-miR-382-5p	1.95676	1.70603	1.63434	1.49166	1.93144	2.25034	1.77755	1.9346	0.970509	1.77014	2.36036	1.71772	1.6794	1.66389	1.81285	1.44755	0.967352	2.30734	1.68256	1.20826	1.51566	1.62088	1.82622	1.69161	2.08071	1.28107	1.90461	1.77014	1.50229	1.86411	1.27791	1.34369	1.39862	1.47427	2.02513	1.41553	1.64441	1.58848	1.63434	2.15296	1.79516	0.556811	1.56865	1.34053	1.64441	1.55355	1.6511	1.12126	2.32499
hsa-miR-409-3p	2.01269	2.15453	1.83823	1.91456	2.47861	2.73852	2.37284	2.76354	0.972624	2.20535	2.92706	2.18491	2.03447	2.22353	2.47212	1.97143	1.45327	2.63508	1.98754	1.70256	1.83094	2.17557	2.28419	2.21654	2.9086	1.93286	2.57114	2.56272	2.35615	2.33702	1.723	1.6374	1.49317	2.03091	2.49504	1.82697	2.46857	2.22871	2.30358	2.827	2.67887	0.929076	2.24164	2.13526	2.46857	2.47989	2.17299	1.81542	3.01915
hsa-miR-421	1.1115	1.40707	1.11145	0.893631	0.893681	1.06652	0.815938	0.893631	1.25493	0.893681	1.1115	1.22333	0.815938	1.11145	1.25498	1.15209	0.959412	1.22338	1.28435	1.42782	1.18925	0.815938	1.46666	1.15209	1.31192	0.598067	1.01635	1.06658	1.33777	0.959412	1.01635	1.0163	0.893631	1.22338	1.15214	0.959362	1.11145	1.22338	0.598067	0.720787	1.28435	1.40707	1.15209	0.720787	0.893631	0.425223	1.50222	0.425173	0.893681
hsa-miR-423-3p	3.05401	3.06146	2.97553	2.95553	3.165	3.38961	3.03552	3.24799	3.11005	3.09609	3.07218	3.16342	3.08758	3.19941	3.16875	3.03566	3.46028	3.30697	3.1512	3.13461	2.94871	2.96685	2.93036	3.19367	3.22303	3.02067	3.08717	3.25822	3.13923	3.30047	2.85865	3.09982	3.06376	3.12706	3.14465	3.02162	2.93342	3.01766	2.96429	2.96523	3.2054	2.93444	3.07232	2.93963	2.93805	3.24926	3.02338	2.71673	3.34084
hsa-miR-423-5p	3.75435	3.515	3.81885	4.05115	3.56138	3.33364	3.91012	4.22498	3.18226	3.4839	3.54485	3.22184	3.67347	4.71193	3.32095	3.76187	4.88957	3.18501	3.41744	4.33054	3.90662	3.63851	4.03323	3.98812	3.91619	4.27458	4.08086	4.23364	4.43172	4.05862	3.87701	3.40355	4.12024	4.56847	4.07871	4.23251	4.23109	4.37237	3.62877	4.5123	4.08681	3.84269	4.15154	4.09906	3.66265	4.16897	4.14714	4.39003	3.8298
hsa-miR-424-3p	1.36518	1.56744	1.38592	1.31958	1.38618	1.46095	1.60601	1.68421	0.970598	1.36518	1.4062	1.44338	1.46121	1.72336	1.73287	1.50972	1.50998	1.78458	1.76777	1.93374	1.52508	1.56744	1.24138	1.81563	1.72362	1.47783	1.55378	1.86574	1.86574	1.87898	1.55378	1.42507	1.42507	1.82337	1.24138	1.61787	1.65232	1.44364	1.06663	1.46121	1.72336	1.71416	1.83047	1.46121	1.36492	1.86574	1.72362	1.17953	1.46121
hsa-miR-425-3p	1.83669	1.5789	1.37144	1.68652	1.32463	1.27139	1.53582	1.27139	1.77242	1.39341	1.59234	1.52017	1.47058	1.43349	1.66507	1.24219	1.618	1.59234	1.70717	1.61774	1.32463	1.41406	1.8292	1.76369	1.60536	1.14012	1.53582	1.55068	1.66507	1.68678	1.27165	1.09978	1.61774	1.82157	1.43375	1.52017	1.4138	1.59234	1.05518	1.27165	1.53556	1.8584	1.56476	1.3717	1.14012	1.39341	1.64219	1.17694	0.949076
hsa-miR-425-5p	2.29581	2.53083	2.30564	2.1621	2.21855	2.33634	2.46089	2.20103	2.25202	2.23452	2.40981	2.33634	2.25891	2.26095	2.42619	2.25799	2.6339	2.2648	2.10259	2.31352	1.98692	2.39496	2.41603	2.39404	2.29308	2.00776	2.33479	2.5032	2.67294	2.17037	2.00868	1.98038	1.90653	2.75035	2.29308	2.18728	2.2976	2.64005	1.86423	2.35894	2.41305	2.19513	2.16945	2.35894	2.02339	2.33479	2.48607	2.11928	1.95206
hsa-miR-432-5p	2.10191	1.69884	1.45008	1.75968	1.93766	2.22005	1.99277	2.23896	0.75749	1.76327	2.46861	1.72449	1.69884	1.67005	1.98876	1.6617	0.995115	2.19465	1.7664	1.2264	1.58549	1.78917	2.10191	1.82853	2.57564	1.2482	2.14646	2.0762	1.78917	2.16853	1.24507	1.20349	1.57858	1.75656	2.01608	1.64452	1.87791	1.78284	1.90803	2.15763	2.1849	0.913679	1.74594	1.41903	1.90315	1.72863	1.87478	1.12673	2.42231
hsa-miR-450a-5p	1.05786	1.54636	1.13651	1.13651	1.09788	1.09996	1.09788	1.01568	1.13651	1.19917	1.36946	1.28279	1.30472	0.0928904	1.60733	1.09996	0.0908122	1.32742	1.56136	1.30679	1.19917	1.05786	0.964139	1.54844	1.6801	0.910137	1.25525	1.51925	1.51925	1.6801	0.766746	1.40974	1.50709	1.55928	1.13443	1.35104	1.44476	1.16804	0.554287	0.766746	1.5739	1.89844	1.83954	0.964139	1.30679	1.44268	1.22814	0.910137	0.552209
hsa-miR-450b-5p	1.05607	1.67168	1.33648	1.46347	1.17846	0.764766	1.05607	0.830352	1.83937	1.43149	1.31395	1.42017	1.53514	1.15461	1.74082	1.37195	0.293738	1.38503	1.92164	1.29777	1.88901	0.933668	0.683586	1.68355	1.33287	1.27701	1.12165	1.01905	1.17846	1.76828	0.826743	1.68355	1.91219	1.05607	1.61842	1.15461	1.02265	1.05607	0.469858	1.05607	1.42017	1.77488	1.50278	0.466249	1.02265	0.883555	1.31395	1.12526	0.588647
hsa-miR-451a	5.08629	5.23396	4.88726	4.96251	4.22062	4.15827	4.96502	4.05036	5.08554	4.37603	4.63881	4.1645	4.5353	4.97741	4.94146	4.53396	5.10962	4.26548	4.73366	4.82351	4.37341	4.468	4.9972	4.68482	4.40163	4.26593	4.74174	4.97568	5.18753	4.19202	4.42088	4.03179	4.44416	5.30577	4.41874	4.62338	4.7812	5.28544	3.83253	4.92416	4.86902	5.09355	4.54316	4.80753	4.09812	4.68154	5.37454	4.59904	3.86662
hsa-miR-483-5p	0.683113	0.462192	0.463005	2.11249	-0.0129337	-0.0121203	0.286837	1.37997	-0.0121203	0.286837	0.683113	0.287651	0.586608	1.88301	-0.0129337	1.67101	1.32387	0.462192	0.683926	1.37997	1.75778	-0.0129337	1.70413	1.12921	0.761963	1.71303	1.06173	0.886379	1.30376	0.286837	0.462192	0.829443	1.02492	1.18615	0.462192	1.67974	1.42898	1.0241	0.587421	1.09635	1.26128	-0.0129337	1.72096	0.462192	0.938131	1.64287	1.45801	1.54952	-0.0129337
hsa-miR-484	2.33788	2.36131	2.44564	2.29643	2.21469	2.42646	2.34006	2.39885	2.57452	2.3444	2.34223	2.35278	2.41578	2.73647	2.43368	2.25078	3.00295	2.49263	2.48941	2.58701	2.42839	2.24825	2.45757	2.32664	2.36131	2.27167	2.45088	2.54857	2.54587	2.41395	2.51063	2.42646	2.21744	2.73136	2.96555	2.32213	2.26135	2.56572	2.19369	2.5772	2.4705	2.22899	2.18131	2.36748	1.98143	2.26669	2.68483	2.37542	2.56312
hsa-miR-486-3p	2.17367	2.40271	2.42073	1.94106	2.37309	2.47779	2.58974	2.4888	1.83925	2.50017	2.25199	2.34273	2.39512	2.4033	2.3566	2.24661	2.74941	2.27308	1.95873	2.72121	1.6932	2.25629	2.26686	2.2936	2.28523	2.48272	2.66338	2.761	2.87762	2.39204	2.46802	2.04089	1.76353	2.76856	2.26267	1.90819	2.44558	2.65609	1.85621	2.54094	2.41356	2.09951	1.91785	2.53112	2.05827	2.45628	2.70826	2.14408	2.24764
hsa-miR-486-5p	4.39274	4.67015	4.76026	4.63034	4.27093	4.19158	4.76077	4.50815	4.96143	4.31753	4.42169	4.18828	4.52283	5.19619	4.44905	4.50713	5.1546	4.22784	4.26062	4.78049	4.0359	4.39567	4.2894	4.06371	4.23329	4.41797	4.57767	4.87607	5.15604	4.17325	4.74112	4.12407	4.3331	5.2015	5.01525	4.32602	4.66146	4.91954	4.0963	4.8728	4.55154	4.41805	4.17059	4.80711	3.99991	4.56149	5.08203	4.75201	4.33042
hsa-miR-493-5p	1.16899	1.16899	0.895082	1.36054	1.6206	1.60866	1.13351	1.31383	0.826736	1.28793	2.00151	1.52528	1.33725	1.09548	1.76625	1.05322	0.031775	1.78363	1.45948	0.646965	1.26106	1.00596	1.20185	1.36054	1.98014	0.7459	1.35999	1.20185	0.74535	1.49305	0.518866	0.7459	1.09548	0.031775	1.75729	0.7459	1.36054	1.00596	1.13406	1.45893	1.54031	0.339095	1.26161	0.646415	1.36054	0.826186	1.13351	0.519416	1.45893
hsa-miR-500a-3p	1.5128	1.59709	1.48008	1.00147	1.00186	1.29262	1.00186	0.804046	1.71753	1.17217	1.17217	1.34209	1.54281	0.880629	1.63364	0.880629	0.128411	1.60963	1.42638	1.40684	1.34249	1.00186	1.05134	0.880629	1.17217	1.13523	1.09559	1.13563	1.40724	1.40724	1.2659	1.57043	1.46293	1.3652	1.46332	1.05094	1.05094	1.2659	0.804046	0.710712	1.17178	1.5128	1.13523	0.710712	0.589479	0.945773	1.54281	0.710317	0.945773
hsa-miR-501-3p	1.88003	2.07665	2.25758	1.84272	1.68759	1.722	2.10581	2.21875	1.98392	1.87027	1.87518	1.88746	2.1114	2.45603	1.89889	1.96865	2.61469	1.92999	1.97252	2.37585	2.09148	1.97846	1.90348	1.83209	1.78879	2.22932	2.0675	2.14861	2.50958	1.81774	2.21656	2.18995	1.79264	2.5932	2.70614	2.15406	2.11755	2.24981	1.60127	2.30233	2.01287	1.85519	1.77452	2.15367	1.55185	1.95087	2.48408	2.33409	1.85004
hsa-miR-502-3p	1.59667	1.58318	1.62257	1.27936	0.916796	1.11507	1.18822	1.3772	1.8589	1.02699	1.25097	1.35471	1.50869	1.3772	1.62247	1.15323	1.41889	1.54002	1.69195	1.54012	1.54002	1.18822	1.11497	1.15323	1.22071	1.27936	1.22071	1.3985	1.64684	1.45704	1.52463	1.64694	1.47504	1.64684	1.8802	1.3772	1.3986	1.52463	0.849307	1.25097	1.25107	1.58318	1.07328	0.975344	0.671525	1.18822	1.83631	1.18832	1.02699
hsa-miR-503-5p	1.26722	1.50709	1.21379	1.04256	0.948899	1.18465	1.31419	1.15336	1.3943	1.12013	1.12013	1.33528	1.37611	1.52036	1.75531	1.31362	1.26722	1.12013	1.44608	1.67774	1.55995	1.37611	0.656178	0.826833	0.750413	0.891932	1.37611	1.44665	1.72281	1.21437	1.44665	1.21379	1.08281	1.52094	1.04313	0.749838	1.33528	1.55995	0.655602	0.948899	1.24105	1.31419	1.04256	1.21437	0.749838	1.08338	1.81366	0.749838	0.827409
hsa-miR-532-5p	2.91522	2.93784	2.47291	2.42342	2.47624	2.62944	2.61404	2.56788	2.70655	2.44331	2.41726	2.53762	2.48612	2.57446	2.80927	2.49719	2.34853	2.42675	2.52897	2.92392	2.51291	2.42298	2.93508	2.67699	2.93453	2.57966	3.0034	3.13325	3.37314	2.69437	2.66893	2.91995	2.38615	3.34408	2.83751	2.61901	3.08372	3.26146	2.29471	2.71272	2.92841	2.88635	2.82712	2.78616	2.58094	3.10142	3.13187	2.57836	2.41146
hsa-miR-543	1.07557	1.45412	1.28532	1.45856	1.99042	2.15804	1.96063	2.22881	-0.0301707	1.07557	2.33917	1.83482	1.38525	1.82086	1.77171	1.38969	1.28088	2.3025	1.45856	1.37068	1.61347	1.54086	1.85054	1.97522	2.1043	1.48939	1.94495	1.85054	1.59056	1.7638	0.834765	1.04114	0.770335	1.23119	1.99042	1.40793	1.6066	1.48494	1.6066	2.20991	1.97017	-0.0346114	1.68036	1.42101	1.63971	1.69493	1.4698	1.04114	2.13661
hsa-miR-550a-5p	1.25091	1.58472	1.24979	1.11848	1.27823	1.1892	1.3281	1.1892	0.92712	1.35099	1.03464	1.11848	1.3039	1.30278	1.53002	1.22058	1.1196	1.2217	1.37159	1.88343	1.37271	0.984774	0.928241	1.32698	1.2217	0.983654	0.862977	1.4499	1.64445	1.41306	1.3281	1.22058	1.03352	1.59736	1.25091	1.27711	1.11848	1.19033	0.690194	1.19033	1.1892	1.39336	1.07813	0.785787	0.784667	1.3039	1.49976	0.690194	1.07925
hsa-miR-574-5p	1.02574	0.976851	0.856689	1.79836	1.14515	1.28897	1.56504	1.89949	0.400682	1.10903	1.02574	1.1444	1.52548	2.14595	1.28972	1.76094	2.54639	0.921425	0.920673	2.05255	1.43286	1.35718	2.06854	1.58871	1.68445	1.97141	1.64489	1.98607	2.09392	1.61253	1.7617	1.1444	1.58871	2.20713	1.4498	1.81244	1.852	1.83998	1.20838	1.93775	1.91056	1.37743	1.76094	1.49684	1.55152	1.90581	1.97216	1.6837	1.4498
hsa-miR-576-3p	1.64464	2.03496	2.19554	1.46709	1.28844	1.30958	1.57984	1.39567	2.10231	1.51504	1.62712	1.48003	1.80643	1.61042	1.76985	1.61042	1.51504	1.45217	1.9706	1.63755	2.00329	1.01661	1.28844	1.22522	1.37823	1.20119	1.08684	1.11799	1.64464	1.37823	1.40938	1.52813	1.808	1.08684	1.96504	1.30958	1.20119	1.26793	0.592911	1.08684	1.30958	1.64464	1.20119	0.591337	0.82817	0.882731	1.8662	1.3798	0.470397
hsa-miR-584-5p	2.82778	2.52333	2.59443	2.34974	2.80206	2.75496	2.58387	2.4695	2.38031	2.80206	2.72257	2.95757	2.59666	2.58712	2.57355	2.63506	2.73849	2.73457	2.48951	2.682	2.37238	2.52862	2.57545	2.29412	2.61603	2.68052	2.61083	2.56006	2.65239	2.45307	2.6492	2.62335	2.27577	2.72861	2.72527	2.25857	2.49523	2.55216	2.37286	2.68522	2.58712	1.96761	2.51413	2.41933	2.57308	2.36937	2.63951	2.40331	2.78599
hsa-miR-589-5p	1.76913	1.43931	1.01852	1.45576	1.43931	1.34513	1.34529	1.16664	1.79988	1.32381	1.38534	1.43915	1.34529	1.27727	1.53071	1.34513	1.25227	1.27743	1.61764	1.36561	1.32381	1.09894	1.27743	1.40391	1.30123	1.22542	1.22558	1.13418	1.42204	1.59462	1.25227	1.22542	1.50214	1.63981	1.34529	1.22542	1.13402	1.27743	1.06048	1.40407	1.19701	1.5574	1.30107	1.06064	1.06048	1.30123	1.5023	1.22542	0.79381
hsa-miR-625-3p	1.7705	1.86912	1.43793	1.71868	1.89596	1.85716	1.67903	1.9445	1.87386	1.77734	1.74204	2.63083	1.70371	1.76279	2.00627	2.01358	1.98967	1.91634	1.83981	2.23362	1.91133	1.65292	2.19068	1.83981	1.7705	1.75574	1.79072	1.88005	1.6618	1.98967	1.59563	1.71088	1.59487	1.7705	1.97243	1.99729	1.73387	1.70371	1.84567	1.79072	2.32221	1.26415	1.99312	1.69563	1.58457	1.67903	1.75649	1.6148	1.85221
hsa-miR-629-5p	2.87087	2.9451	3.08681	2.95364	2.64444	2.4828	2.81781	2.90853	3.12919	2.75401	2.72027	2.68011	3.05841	3.12181	2.8649	2.879	3.01265	2.84226	3.08079	3.27782	3.33312	2.62121	2.57552	2.92671	2.6059	2.68242	2.55123	2.61317	2.91139	2.99266	2.84856	2.8667	2.98394	2.77921	3.34063	2.62765	2.64891	2.59098	2.38124	2.76742	2.65057	2.79365	2.59694	2.35869	2.25629	2.28985	3.09451	2.85812	2.58332
hsa-miR-652-3p	2.24896	1.86347	1.76232	1.93775	1.63026	1.58115	1.56357	1.33029	2.60749	1.70135	1.66011	1.88962	1.81587	1.54508	1.96001	1.66004	1.79527	1.88113	1.91435	1.8158	1.79527	1.71427	1.8897	1.83547	1.64544	1.70128	1.72681	1.79527	1.81587	1.72681	1.70135	1.63019	1.92229	2.08448	2.10041	1.82575	1.41429	2.04487	1.22594	1.83554	1.71419	2.11578	1.63019	1.4391	1.33029	1.13919	2.04487	1.78451	1.33036
hsa-miR-654-3p	1.78229	1.36972	1.18105	1.49314	1.65872	1.71967	1.56705	1.51014	0.520813	1.36972	2.06653	1.37501	1.13972	1.68711	1.67042	1.01547	1.01019	1.95269	1.39698	0.750818	1.43265	1.41264	1.88635	1.51014	2.14138	1.01547	1.92731	1.79121	1.36972	1.69294	1.05763	0.750818	1.06291	1.52122	1.64672	1.4571	1.55758	1.45181	1.14501	1.81694	1.78758	0.332959	1.51014	1.26925	1.43794	1.24019	1.50485	0.902318	1.78229
hsa-miR-660-5p	1.52424	1.64995	1.45492	1.71988	1.37483	1.13917	1.45616	1.37359	1.9543	0.850053	1.27381	1.27257	1.45616	1.45492	1.56416	1.47886	1.4801	1.34379	1.76922	1.70658	1.45616	1.31026	1.54468	1.54344	1.56416	1.523	1.45616	1.27381	1.85452	1.45616	1.69409	1.40249	1.67865	1.8146	1.56416	1.13917	1.50151	1.56416	0.2681	1.23388	1.45492	1.72112	1.34255	1.14041	0.942287	1.40373	1.948	1.37359	0.26934
hsa-miR-664a-5p	1.82695	1.68002	1.69341	1.25746	1.77619	1.80244	1.59054	1.77631	1.19991	1.70615	1.78683	1.71257	1.83642	1.13348	1.6376	1.7485	1.50864	1.50864	1.444	1.60693	1.5377	1.59054	1.52823	1.63773	1.62248	1.45549	1.45537	1.41993	1.36763	1.77077	1.30809	1.40756	1.71257	1.3535	1.46656	1.49863	1.15678	1.19978	1.35362	1.56493	1.444	1.5377	1.30822	1.15665	1.4776	1.36763	1.54697	1.10885	1.71244
hsa-miR-744-5p	2.39086	2.51616	2.1872	2.19872	2.72535	2.88823	2.58502	2.65712	1.67329	2.57184	2.58027	2.64903	2.44435	2.19587	2.47872	2.46844	1.93381	2.37783	2.28837	2.4669	1.95898	2.46187	2.55825	2.36281	2.64041	2.14114	2.48469	2.46653	2.30616	2.53507	2.04332	2.17238	2.1663	2.34243	2.25927	2.35888	2.28837	2.24672	2.11787	2.32996	2.52201	2.14399	2.48059	2.41409	2.43153	2.52028	1.96866	2.04771	2.51616
hsa-miR-769-5p	1.70966	1.4946	0.910421	0.833664	1.03209	1.23593	1.03209	1.32335	0.910421	0.910977	1.20279	1.29618	0.910977	0.156095	1.4946	1.08112	0.83422	1.12603	1.1656	1.1656	0.975874	1.03209	1.43839	1.12548	1.699	1.12548	1.37349	1.4946	1.3239	1.26769	0.83422	1.29618	1.20223	1.43839	1.08168	1.12548	1.34887	1.20279	1.03153	1.08168	1.52774	1.43839	1.62811	1.16616	1.26713	1.60235	1.08168	0.739721	1.12603
hsa-miR-941	2.00693	2.27102	1.92427	1.9453	2.00245	2.13457	2.18156	2.04181	1.84802	1.97932	1.99334	2.003	2.04126	2.03767	2.14394	1.9846	2.10639	1.84746	2.02498	2.01193	2.15365	1.36217	2.14394	2.23314	2.2299	1.80076	1.99334	2.38312	1.90162	2.2299	1.81423	1.8907	1.73974	2.47401	1.71393	2.05803	2.16682	2.40358	1.71449	1.70519	2.13121	2.1755	2.173	1.50805	1.72307	2.19923	2.10994	1.73148	1.7783
hsa-miR-942-5p	1.44046	1.46066	1.3455	1.22641	1.06113	1.15093	1.2928	1.10731	1.5465	1.00585	1.10989	1.19039	0.942037	1.53026	1.19297	1.15093	1.5647	1.10989	1.3455	1.69256	1.26212	1.10989	1.46066	1.22641	1.26212	1.00327	1.19297	1.59428	1.76687	1.15351	1.22899	1.15093	0.939457	1.75735	1.49832	1.19039	1.19039	1.5647	0.652506	1.44046	1.39426	1.10989	1.22641	1.39684	0.863979	1.15351	1.64777	1.10731	1.10989
hsa-miR-1180-3p	1.68048	1.92278	2.00791	1.82337	1.43767	1.4699	2.04648	1.94239	1.72601	1.5893	1.60184	1.43488	1.71958	2.32176	1.68048	1.8581	2.84501	1.50502	1.81607	2.32176	1.82617	1.82617	1.97161	1.62306	1.50502	1.97391	1.92278	2.12448	2.35027	1.25814	2.03782	1.39667	1.37618	2.41204	2.26783	1.63456	1.89018	2.15203	1.19524	2.01994	1.83761	1.6701	1.37618	2.04648	1.04079	1.68048	2.38803	1.99847	1.54927
hsa-miR-1246	2.24275	2.38209	3.04168	2.32403	2.70025	2.60639	2.14608	3.27906	2.08885	2.90365	2.52966	2.79861	3.14611	1.67986	2.66225	3.01593	1.81548	2.71256	3.36076	2.35373	3.00617	2.38433	1.72417	2.81054	2.62646	2.50236	2.0243	2.14414	1.78564	3.16337	2.08389	2.70397	2.82256	2.38545	3.00913	3.13314	1.66273	1.10854	2.63117	2.63474	2.42019	2.78401	2.28381	1.3439	1.93215	1.86231	1.79438	2.24107	2.80672
hsa-miR-1285-3p	1.36051	1.39719	1.67052	1.16909	0.87782	0.519772	1.29872	1.13786	0.933207	0.934105	1.10502	0.876922	1.36051	1.67959	1.22628	1.10412	1.61251	0.812843	1.10412	1.60094	1.13875	1.10502	1.02816	0.811945	0.735991	0.876922	1.10502	1.13875	1.49125	0.641933	1.25183	0.641035	1.16909	1.53142	1.55622	0.933207	1.19818	1.25183	0.641035	1.27593	1.06744	1.13875	0.735093	1.02816	0.348862	0.735991	1.59089	1.02727	0.735991
hsa-miR-1301-3p	1.48562	1.48562	1.36786	1.0731	1.74999	1.91685	1.68181	1.84773	0.642915	1.74204	1.6629	1.80845	1.45523	0.880891	1.60056	1.57728	1.17594	1.54057	1.51369	1.48533	1.40515	1.63287	1.40515	1.28252	1.81554	1.58893	1.55326	1.43918	1.4707	1.6999	1.03285	1.5653	1.32733	1.3058	1.51398	1.32733	1.34807	1.23272	1.30551	1.51398	1.70839	1.07338	1.57728	1.23272	1.5653	1.4225	1.17594	0.937675	1.82883
hsa-miR-1307-3p	2.2609	2.4432	2.11818	2.08908	2.51028	2.88929	2.55577	2.76508	1.72679	2.42637	2.49005	2.67341	2.27578	2.12516	2.59804	2.41205	2.71946	2.40526	2.2264	2.47463	2.30862	2.39982	2.65404	2.42429	2.5658	2.19229	2.52142	2.55703	2.38872	2.36166	1.8982	2.33027	1.86739	2.35156	2.15235	2.25032	2.3846	2.33701	1.97802	2.19265	2.53326	1.97838	2.54643	2.33063	2.4669	2.54157	2.10059	1.94772	2.45137
hsa-miR-1307-5p	1.36473	1.56359	1.66847	1.42226	1.52166	1.52044	1.56359	2.22263	1.45748	1.4913	1.4913	1.64701	1.69016	1.60065	1.61393	1.76244	1.44144	1.52166	1.79504	1.7539	1.62566	1.3852	1.4587	1.818	1.40476	1.80283	1.4587	1.34326	1.27176	1.52166	1.27176	1.50552	1.56237	1.36473	1.65909	1.56237	1.53486	1.29691	1.15251	1.53608	1.36351	1.27176	1.52044	1.18634	1.18512	1.66969	1.3852	1.42226	1.15373
hsa-miR-1908-5p	0.487296	1.08234	1.08212	0.850767	1.00408	1.44581	1.23185	1.32233	0.31304	1.17812	1.14851	0.908084	0.610779	0.95864	0.784818	1.30139	1.83316	0.908301	0.487079	1.30139	1.1167	0.784818	1.00408	1.00386	1.00408	1.08212	0.908301	1.04499	1.1167	0.784818	1.1167	0.610562	0.610562	1.14851	0.850985	0.908084	1.04477	0.70656	0.706342	0.70656	1.27937	0.487296	1.04477	0.850985	0.784601	1.04499	1.00408	0.784601	1.25638
hsa-miR-2110	1.9786	2.14351	2.16396	1.46418	1.8317	1.84961	1.99495	2.06612	1.70549	2.00683	1.83747	1.76348	2.09508	2.02676	1.94843	1.91687	2.46781	1.89643	1.87142	2.13564	2.0653	1.91123	1.71236	1.77022	1.92555	1.88193	1.84879	2.11693	2.2221	2.02219	1.9786	1.86065	1.90223	2.28046	2.20993	1.75664	1.81473	2.00683	1.62032	2.04785	1.96243	1.90142	1.77686	1.78259	1.49016	1.83747	2.13189	1.86606	1.87589
hsa-miR-3158-3p	1.86823	2.2409	1.68516	1.5799	1.57182	1.47122	2.05196	1.70337	1.85185	1.25614	1.54643	1.42189	1.34959	1.68516	1.76557	1.38545	2.01517	1.37002	1.27747	1.85185	1.16918	1.57182	1.87425	1.66612	1.37002	1.52908	1.77325	2.20173	2.4057	1.28153	1.53313	1.16512	0.764948	2.47384	1.25614	1.32405	1.81937	2.33236	1.09516	1.79549	1.51534	1.60723	1.45541	1.95061	1.22505	1.9795	2.13351	1.40407	1.09921
hsa-miR-3613-5p	1.13709	1.40515	1.20489	1.00949	1.09861	1.05609	1.09861	0.830177	1.26394	0.898726	1.38458	1.05609	1.29113	1.2354	1.23578	1.20489	1.31641	0.957779	1.20489	1.52695	0.898726	1.05646	0.957779	1.09824	1.34032	0.957402	1.46169	1.26432	1.82617	1.05646	1.40515	1.13672	1.31603	1.77698	1.49572	1.20489	1.29075	1.42481	0.0377834	1.17249	1.3842	1.29113	0.898349	0.651239	0.650863	1.05646	2.05208	0.830177	0.749923
hsa-miR-3615	2.139	2.72168	2.72718	2.49854	2.58025	2.4841	2.6467	2.77083	2.06681	2.50438	2.63974	2.59293	2.86096	2.9763	2.70997	2.52907	3.14524	2.63895	3.15427	2.84736	3.07608	2.62138	2.48104	2.75698	2.56089	2.46204	2.3763	2.57481	2.72296	2.86688	2.4776	2.71761	2.24064	2.80976	2.63185	2.51879	2.42724	2.62625	2.34431	2.66252	2.48183	2.16177	2.60324	2.58384	2.09654	2.56651	2.62866	2.47726	2.57298
hsa-miR-4433b-3p	1.54297	0.283812	0.824308	1.18106	2.04346	2.12323	1.60782	1.55435	-0.0154426	1.79921	1.91193	1.75146	1.25535	1.96318	1.01949	1.92644	1.99309	1.20735	0.283683	1.75859	-0.0153129	1.69805	2.44614	2.1526	2.02094	2.07164	1.74433	1.50648	1.77264	1.85924	1.54297	1.39058	1.77251	1.40699	0.882063	1.58714	2.22556	1.31862	1.75146	2.2797	2.09171	0.45879	1.84196	2.28808	1.786	2.16943	0.582938	1.61761	2.13238
hsa-miR-4443	0.89968	1.09591	1.31423	1.57098	1.063	0.717428	0.946475	1.60234	0.717428	0.638621	0.719597	0.986636	1.063	2.14705	1.46307	1.41718	2.22773	0.788061	1.46091	1.71731	1.91237	0.946475	1.20753	1.685	1.38762	1.27383	0.788061	1.09591	1.15522	1.56218	0.231661	1.15305	1.51322	1.18215	0.89968	1.17998	1.33313	0.788061	0.986636	1.09591	1.27383	0.539515	1.46091	0.847368	0.785892	1.18215	0.638621	1.36868	0.847368
hsa-miR-4732-5p	1.40456	1.37244	1.57465	1.60412	1.09956	0.892722	1.76471	1.74044	1.02561	1.09956	1.27932	0.483419	1.52461	2.20568	1.06615	1.44429	2.6845	0.841229	1.15504	2.20568	1.09956	1.54717	1.71637	0.98584	1.23536	1.23113	1.70147	1.91159	2.03393	1.15927	1.51285	0.483419	1.25369	2.24435	1.85258	1.47123	1.64903	1.81962	0.98584	2.07926	1.66573	1.53604	1.23113	1.70899	0.772671	1.41973	2.06995	1.69724	1.33765
hsa-miR-6842-3p	1.52801	1.35039	1.24791	1.38532	1.35039	1.71354	1.38545	1.63526	1.14436	1.47641	1.51567	1.31214	1.41792	1.17263	1.41792	1.27038	1.36827	1.40199	1.35025	1.38532	1.35039	1.35039	1.31227	1.53988	1.43329	1.11413	1.19932	1.14449	1.0818	1.50297	0.810616	1.11413	1.14436	1.31227	1.22436	1.19919	1.08167	0.966866	1.00849	1.22436	1.17263	1.24805	1.48976	1.00862	1.27038	1.41792	1.00862	1.0466	1.19932
hsa-miR-7706	1.03171	1.79192	1.51737	1.33188	1.21193	1.3495	1.72002	1.39827	1.12635	0.948626	1.18683	0.839382	0.992246	1.8632	1.43305	1.20673	1.60565	1.21193	1.31348	1.52871	1.10087	1.2356	1.5109	0.943429	1.18683	0.700079	1.3716	1.58639	1.84267	0.992246	1.38784	0.987049	0.607695	1.69803	0.899862	0.987049	1.27402	1.70549	0.700079	1.2356	1.33188	0.780759	0.894665	1.62405	0.839382	1.4989	1.53391	0.943429	0.844579
[truncated: 130 more columns]

## Sheet: Supplemental Dataset 3
Supplemental dataset 3. qPCR Validation of neural network. dCq values from qPCR validation experiment performed on the primary cohort. Higher values represent higher expression of a given miRNA. MiRNAs included in the set as potential normalizers are marked out in bold.
Name	1	2	3	4	5	6	7	8	9	10	11	12	13	14	15	16	17	18	19	20	21	22	23	24	25	26	27	28	29	30	31	32	33	34	35	36	37	38	39	40	41	42	43	44	45	46	47	48	49
let-7c-5p	-3.35016	-2.85351	-3.65244	-3.53421	-3.22152	-3.08436	-3.67706	-4.53472	-2.87487	-3.69366	-3.24107	-3.18596	-3.36797	-3.59064	-3.51375	-3.35992	-3.51327	-2.61299	-4.34639	-2.40833	-3.18246	-2.64355	-3.34018	-2.89043	-2.90006	-2.45135	-3.50699	-2.49609	-2.65076	-2.82105	-3.55239	-2.87894	-4.20336	-3.48842	-2.1843	-2.74569	-4.42748	-2.37957	-2.43343	-3.71436	-3.63495	-2.87011	-3.77097	-4.20948	-2.14566	-3.40892	-2.17908	-2.56811	-2.88264
miR-103a-3p	0.224608	-0.209479	1.25864	0.76914	1.33134	0.593282	1.44159	0.870227	0.242702	1.40267	0.720652	1.39987	0.875094	1.31853	0.752807	0.7353	0.736033	1.13125	1.2952	1.03026	1.42154	1.02973	1.06498	0.687224	1.53325	1.26246	-0.109256	0.660458	1.06252	0.869494	0.833383	1.53781	0.602238	0.718327	1.63821	0.311115	0.986721	0.365519	2.3749	1.36172	0.849261	1.11789	0.295312	1.09082	1.65899	0.392328	1.0955	0.555684	1.01603
miR-1246	-0.413886	0.0738467	1.64861	1.47807	0.206709	1.37831	0.598261	3.32385	1.0713	3.89631	2.02224	1.62015	-0.463614	0.217455	2.46525	0.163362	2.76279	-1.4661	0.470277	2.34042	1.61701	2.09866	3.42243	-0.287774	1.32212	2.76604	2.08584	0.24614	0.663091	0.408651	2.23042	2.53948	2.10154	0.885028	3.04912	2.61744	0.434945	3.98394	-1.16933	2.85484	1.4641	1.26139	-0.660371	0.892603	0.7049	2.26362	3.01864	0.632448	1.38883
miR-1307-5p	-7.49352	-9.52061	-7.97084	-6.19411	-7.25452	-7.06549	-9.29209	-6.53241	-9.07598	-6.16304	-8.70668	-5.28634	-6.99621	-5.68324	-5.03821	-5.66777	-9.36088	-8.74379	-7.04352	-5.68748	-10.3176	-8.91268	-8.47941	-8.41279	-7.753	-5.5325	-6.71368	-7.32364	-8.6236	-7.09399	-7.24099	-7.89647	-5.79295	-7.08374	-10.0355	-7.53292	-5.13576	-7.97802	-6.48456	-8.97595	-5.53714	-5.69096	-8.81892	-9.42408	-7.08824	-5.03663	-5.65429	-4.97074	-8.18113
miR-146b-5p	-6.28916	-5.62318	-7.29818	-6.62435	-6.69552	-6.34805	-6.85941	-7.50147	-7.78305	-6.53979	-6.70096	-7.08901	-7.56706	-8.08831	-7.59543	-7.04885	-6.44166	-6.26591	-4.85147	-6.48198	-6.43444	-6.57112	-5.82755	-6.48732	-7.36158	-5.05475	-5.69456	-6.1999	-5.92968	-6.46941	-6.65088	-6.0426	-6.09289	-6.59053	-7.09788	29.4671	-7.17678	-4.90015	-5.93622	-5.57533	-6.72128	-6.55242	-6.62236	-7.04785	-6.08163	-7.4713	-5.49367	-6.35929	-5.77685
miR-148b-3p	-0.969242	-1.31287	-1.58388	-1.41662	-1.55932	-2.33156	-1.89277	-1.89177	-3.06175	-0.436905	-3.30901	-0.787696	-0.817165	0.185225	-2.09568	-0.981314	-2.11002	-1.61102	-1.73138	-1.8111	-1.33982	-1.38742	-0.833967	-1.21294	-2.0639	-0.855731	-1.86212	-2.33487	-1.47376	-1.36163	-1.44838	-2.17071	-1.55285	-2.60637	-2.02335	-1.60344	-1.19332	0.734163	-1.40324	-2.05735	-1.58618	-1.2139	-2.19618	-1.44721	-1.53549	-0.399184	-1.18785	-1.26519	-1.79491
miR-150-5p	0.175965	1.31754	1.23685	1.06973	-0.735044	1.06015	-0.255565	-1.3599	0.33551	0.816872	0.182557	-1.43772	1.00144	-0.0308244	0.472684	-0.0575315	0.478844	0.905565	2.76785	0.399384	-0.400551	0.192231	1.0146	1.33292	1.44906	-0.384401	1.18673	1.44989	1.36127	-0.88518	2.16	-0.0309596	0.982964	0.352049	-0.343118	1.90275	-0.384027	0.316245	1.696	0.675408	-0.108297	0.141913	0.0943968	-0.697185	0.383983	1.22809	2.9148	1.46106	1.13105
miR-181a-5p	-1.78469	-1.91835	-1.61824	-2.03889	-0.965116	-1.5792	-1.59593	-1.83023	-1.24446	-2.09432	-1.89652	-2.22424	-1.05635	-1.33086	-1.24124	-2.25238	-2.03991	-1.20143	-1.57315	-1.49174	-2.16166	-0.870629	-2.05378	-1.51732	-1.42511	-1.16729	-2.16332	-0.878731	-1.14065	-1.63983	-0.51803	-1.75627	-1.08688	-1.33096	-1.76163	-1.21362	-1.81827	-0.437526	-1.17799	-1.00408	-1.31145	-1.39308	-1.07047	-1.77168	-1.58382	-1.87129	-0.814604	-0.88352	-2.09082
miR-191-5p	0.21408	0.485845	-0.0958137	0.160241	-0.489117	0.00578378	-1.04112	-0.598666	-0.0517993	0.39801	-0.575301	-0.7199	0.0609874	-0.208501	-0.580484	-0.272943	-0.340726	-0.359035	0.0549981	-0.566472	-0.238558	-0.248665	-0.140957	-0.575534	-0.10333	-0.11306	0.237362	-0.043083	-0.206326	-0.312686	-0.263856	-0.481217	-0.154314	-0.460583	-0.0860979	-0.14226	-0.745223	1.25253	0.0942172	-0.934227	-0.284386	-0.215444	-0.306519	-0.497304	-0.653493	0.62623	0.630239	-0.0579181	-0.29498
miR-200a-3p	-7.71226	-4.50437	-8.95198	-8.70089	-7.01572	-7.27894	-9.29209	-8.62698	-6.31225	-9.14588	-8.70668	-8.10272	-7.85253	-6.51439	-8.17031	-6.95813	-9.36088	-8.85376	-8.64941	-8.50482	-7.1186	-6.58237	-8.47941	-6.36715	-7.753	-3.4902	-5.06681	-2.10532	-7.79943	-9.8877	-6.13098	-5.11792	-10.0766	-8.42706	-10.0355	-4.09842	-6.21393	-4.466	-9.59963	-4.15742	-10.8961	-7.64274	-5.79589	-9.42408	-6.35661	-6.4134	-8.39802	-8.80542	-8.18113
miR-200c-3p	-7.46147	-0.555282	-5.52781	-6.72714	-5.31544	-5.47736	-8.79684	-6.40526	-4.58771	-6.73057	-7.78331	-5.48642	-6.49024	-5.92277	-7.4948	-5.78003	-7.0658	-5.77163	-5.5535	-4.15074	-5.29339	-8.63414	-9.2813	-5.37661	-6.73047	-0.129967	-6.68896	-0.599995	-6.36824	-6.04934	-4.1152	-1.58657	-4.86571	-5.26822	-5.48464	-1.69026	-5.85457	-0.0633032	-7.60902	0.141486	-5.46464	-4.80821	-2.10951	-6.63452	-4.74288	-3.94304	-6.83349	-6.50803	-5.26085
miR-203a	-8.84637	-3.20732	-8.81933	-7.7758	-10.639	-7.13976	-9.29209	-8.15029	-8.11956	-10.4849	-8.70668	-9.13384	-8.86119	-7.91146	-9.46913	-10.7561	-9.05803	-8.74379	-6.49389	-9.15061	-9.93066	-6.92088	-9.15429	-8.41279	-7.753	-2.76915	-4.92102	-4.95867	-7.93905	-9.55138	-7.57451	-4.18573	-8.05557	-8.42706	-10.0355	-3.25562	-10.026	-5.56845	-9.57439	-5.08839	-8.32694	-6.95887	-6.68746	-8.14242	-8.05738	-4.67368	-10.6235	-8.36782	-8.18113
miR-221-3p	0.338905	0.547852	-0.348576	-0.396533	0.0371684	0.168772	0.811388	-0.393644	0.0588042	-0.625805	0.0940027	-0.361657	-0.242572	-0.528913	-0.0331774	0.381052	0.0959213	0.148486	0.158982	0.0466618	-0.168727	-0.215246	-0.399662	0.476405	-0.700865	-0.465896	-0.157174	0.153529	-0.121857	0.360027	-0.322388	-0.20533	-0.0617422	-0.265873	-0.862429	-0.418151	0.246283	-0.502455	-0.925395	0.132897	0.191211	0.0997448	0.474888	0.4735	-0.390969	-0.619792	-1.00474	0.0660188	0.118055
miR-222-3p	0.678901	-0.360602	0.248579	0.600353	-0.671348	-0.103929	-0.833087	0.143045	-0.629136	1.23333	-0.797578	-0.35502	0.083844	0.931791	-0.49836	0.282475	-0.185426	-0.163017	1.91362	-0.364072	-0.336347	0.231439	0.529392	0.0945985	0.163472	0.0992712	0.0849517	-0.331391	0.134936	-0.499096	1.40051	-0.565214	0.269299	-0.720485	0.040575	0.373851	0.00328472	-1.60896	0.494823	-0.119621	0.184474	0.729506	-0.396771	-0.818683	-0.420261	1.00768	1.41553	0.210012	-0.295769
miR-23b-3p	0.837646	1.2971	0.545452	0.538386	0.587262	1.07199	0.366586	-0.0448348	1.1843	0.636546	0.246216	-0.208091	0.0137401	-0.54174	0.532218	0.518872	0.202151	0.479506	0.372336	0.0298923	0.052474	0.167116	0.868722	0.263037	0.297765	0.188937	1.66249	0.929998	0.861474	0.30503	0.462719	-0.443799	0.65133	-0.0394655	-0.759707	0.673472	0.0306115	2.09616	-0.577509	-0.535662	0.400373	0.668463	0.52851	0.194709	-0.551342	0.524644	0.333867	1.1717	0.219179
miR-29a-3p	-1.66017	-1.65277	-1.63527	-1.73783	-1.77508	-2.70201	-3.51319	-2.76609	-2.0014	-0.311276	-5.17317	-0.983822	-2.16336	-0.383354	-2.63956	-1.82554	-2.67105	-1.33913	1.19202	-1.79098	-1.62255	-1.87005	-1.59104	-2.46675	-2.74284	-0.281519	-1.06963	-2.15829	-0.953021	-2.61565	-0.661112	-3.49532	-2.00541	-4.11093	-2.88715	-2.86494	-1.40412	-1.11643	-1.10198	-1.8282	-1.67914	-0.804026	-2.99671	-3.23376	-2.27652	-2.09872	0.0501772	-0.170889	-3.11567
miR-320c	-1.30892	-2.15825	-3.51938	-1.3706	-3.89796	-2.47282	-3.81268	-3.94496	-2.89132	-2.5643	-1.81928	-2.78908	-0.551155	-0.975583	-2.91152	-1.51437	-1.4704	-2.29024	-2.43459	-1.44225	-3.59011	-1.06069	-2.04271	-0.919366	-2.2224	-1.93793	-1.13418	-3.41503	-1.9122	-1.7701	-1.60011	-1.10536	-2.29683	-2.48117	-0.843205	-1.61347	-3.74683	-0.950326	-2.66238	-5.59198	-3.23573	-1.33957	-3.72374	-3.48436	-1.01833	-0.461807	0.651906	-2.96934	-1.38159
miR-320d	-9.61771	-8.60714	-8.81933	-9.66755	-10.6509	-8.6632	-3.61518	-3.59325	-3.62446	-10.4849	-8.70668	-10.5919	-8.86119	-10.3206	-9.33866	-10.7561	-2.24741	-2.84882	-8.64941	-0.455722	-10.3176	-1.43207	-2.22478	-8.41279	-7.753	-1.31862	-8.97744	-2.94105	-2.62562	-10.7363	-0.58868	-2.05812	-9.18428	-8.42706	-1.40512	-1.47907	-10.1782	-7.97802	-3.37682	-3.07431	-9.57303	-1.70069	-8.44738	-3.71026	-1.8047	-8.88072	-0.663628	-3.48808	-1.76226
miR-32-5p	-2.14242	-7.22459	-4.08428	-2.86417	-3.65712	-4.61307	-4.60261	-3.08729	-5.70469	-2.23434	-8.18503	0.390288	-2.58236	0.764198	-4.43659	-1.9009	-3.98063	-1.93986	-3.1165	-1.05366	-2.82044	-2.06695	-2.08463	-2.99742	-3.81141	0.390059	-4.74591	-4.86408	-3.80166	-4.35298	-2.2119	-2.23683	-3.03696	-4.25185	-2.98744	-4.12579	-2.35379	-1.30707	-1.82703	-2.16435	-3.55384	-2.26567	-3.58904	-3.35023	-2.08598	-2.44377	-1.11145	-2.35793	-3.48164
miR-335-5p	-4.64989	-4.49718	-8.81933	-6.02967	-6.27416	-6.2759	-9.29209	-6.77961	-6.60699	-6.16223	-6.74736	-6.41932	-5.8713	-4.77998	-6.99763	-6.05873	-5.59979	-5.22906	-6.32432	-3.60667	-5.79778	-4.82574	-8.47941	-5.28015	-7.04317	-5.54156	-6.74257	-5.55527	-4.35768	-5.00934	-4.68748	-6.02588	-6.02205	-6.66673	-6.12144	-5.664	-6.30996	-4.21271	-6.79035	-7.35242	-5.50595	-4.16117	-8.44738	-9.42408	-5.83205	-6.41924	-5.22832	-6.4904	-5.32435
miR-423-3p	-0.777593	-0.824218	-0.814254	-0.532848	-0.879395	-0.767838	-1.21185	0.122083	-0.249707	-1.17488	-0.239353	-0.31831	-0.69351	-0.581119	-0.139146	-0.843409	-0.491228	-0.920703	-1.50918	-0.510451	-1.01425	-0.565822	-0.524357	-0.588096	-0.729054	-0.6835	0.0290673	-0.770904	-0.734338	-0.916835	-0.24714	-0.851266	-0.386182	0.00812883	-0.689688	0.249295	-0.487781	-1.11559	-1.54372	-0.560392	-0.756085	-1.00219	-0.46368	-1.06701	-0.614525	-0.398766	-0.720994	-0.563784	-0.839108
miR-450b-5p	-7.7098	-7.33979	-8.04643	-6.68856	-7.21114	-6.87667	-9.27894	-5.88661	-8.52278	-4.03863	-8.70668	-5.92395	-8.86119	-6.22354	-5.33292	-7.38013	-6.57949	-8.8528	-8.64941	-6.16194	-6.24691	-4.56328	-5.41744	-9.16561	-7.753	-5.44487	-5.62251	-7.82121	-7.43808	-9.18543	-4.5278	-6.58524	-6.0839	-8.42706	-7.11143	-7.53292	-7.20099	-2.9274	-7.12747	-5.49377	-7.20005	-5.87956	-10.9266	-6.75225	-7.57605	-6.51915	-6.22255	-7.69374	-7.33434
miR-92a-3p	4.64946	3.40322	3.50543	4.069	1.70991	2.72131	1.09891	1.16939	2.39495	2.79923	2.46586	3.09091	5.30873	5.41565	2.09368	4.12433	2.79204	4.19489	2.07583	2.76227	2.20834	2.63943	2.86701	4.65297	3.7954	3.32314	3.21634	2.26272	2.64362	2.6676	3.39499	2.86601	2.9808	2.78537	3.08396	4.12821	3.03612	3.49236	4.26259	1.38116	2.40913	3.20249	3.06508	1.76346	3.8129	5.76355	4.38222	3.51302	4.16214
[truncated: 70 more columns]

## Sheet: Supplemental Dataset 4
Supplemental Dataset 4 Raw qPCR data
design_target_name	layout_id	51193	51194	51195	51196	51197	51198	51199	51200	51201	51202	51203	51204	51205	51206	51207	51208	51209	51210	51211	51212	51213	51214	51215	51216	51217	51218	51219	51220	51221	51222	51223	51224	51225	51226	51227	51228	51229	51230	51231	51232	51233	51234	51235	51236	51237	51238	51239	51240
	Subject ID	1446	2525	80148	80091	80398	81099	50057	81106	80846	1286	80476	80103	80358	80542	1247	80261	80504	1024	80280	81070	80971	50782	81004	81195	80876	81102	80254	80872	2115	2110	81131	1863	50145	1789	81204	2224	70088	80014	1666	50655	80638	1809	81203	2324	81063	81118	81065	80198
	Sample Number	19	86	111	12	44	7	78	59	120	82	115	89	23	65	21	100	53	68	51	77	93	52	114	56	70	31	37	50	71	8	58	40	38	63	113	33	76	39	95	98	75	10	41	108	5	48	14	102
hsa-let-7c-5p		32.697	30.8927	31.9823	29.5941	31.7854	31.385	31.6181	33.0849	28.5731	30.9869	30.6907	30.1674	31.8608	33.8789	29.8649	ND	37.0467	32.7985	31.4988	31.4924	32.9011	31.7516	31.7926	32.6045	31.3018	32.9779	31.2493	32.2684	32.5929	31.9725	32.3757	31.7384	31.4015	31.6847	30.3502	32.0191	31.5426	29.859	31.6077	31.5065	31.0228	30.2087	31.0619	32.093	29.5706	30.7627	30.2701	32.8842
hsa-miR-103a-3p		27.0554	25.9305	26.787	25.0083	26.4851	26.2663	26.2952	28.4918	24.4721	26.5937	25.9395	25.2103	27.4556	29.2315	25.2609	26.7584	32.0024	27.5487	27.1008	26.7378	28.3528	26.3931	26.8428	27.7605	26.2353	28.5921	25.8351	27.0414	27.3257	26.5675	27.1156	26.6623	28.6565	26.9745	26.3238	27.2135	27.2309	25.0507	27.3875	27.6246	26.7112	25.1124	26.5777	27.3137	25.0177	27.6389	25.3609	28.1933
hsa-miR-1246		27.8803	24.5108	25.795	24.788	26.6833	27.1096	27.549	27.6371	22.8136	25.4186	26.5632	25.3388	25.0982	29.9903	25.0654	25.257	31.1958	25.7893	24.7422	ND	25.4478	26.7126	26.5684	26.0162	26.3543	27.1951	26.3869	27.941	27.8648	24.1139	26.4234	25.1692	25.038	26.1178	24.455	25.7142	27.3403	28.5949	25.5549	27.2032	27.2293	22.6188	25.9629	27.683	26.1423	27.5621	26.462	26.7257
hsa-miR-1307-5p		35.3941	33.083	ND	31.6945	ND	ND	34.4107	33.9892	ND	ND	ND	ND	ND	35.6516	ND	35.1715	ND	36.3049	ND	35.3929	ND	35.8924	33.296	33.9943	36.0968	36.6665	31.9576	ND	37.3196	33.9702	ND	ND	ND	32.0653	33.0175	33.6087	33.9578	33.9102	ND	34.6646	34.7118	32.6781	32.9641	34.7458	33.6036	33.1653	32.3627	34.1684
hsa-miR-146b-5p		33.2021	ND	34.2673	33.4971	34.6238	34.5673	34.4155	35.537	31.5309	34.4896	34.3421	34.0665	34.3481	36.2523	33.1169	34.1154	37.8677	35.0931	33.999	34.3381	35.8115	34.5148	32.2948	36.2443	34.246	36.0764	33.9986	34.7677	34.8144	34.9392	ND	33.5994	33.9221	33.2132	33.5717	33.9086	34.0948	33.3618	35.7302	34.7399	34.1611	33.0549	34.1483	35.0697	33.0446	34.5539	34.7677	34.5976
hsa-miR-148b-3p		30.082	27.2923	29.0844	27.1958	29.0231	29.6007	28.6612	32.0809	27.102	29.013	28.25	28.2573	29.3546	30.1092	28.0223	29.8645	33.0182	30.0533	29.364	29.3283	30.989	29.4988	27.5377	29.9117	28.4637	30.8739	28.0152	30.8813	28.4218	29.3295	28.9626	30.0814	28.2878	27.5138	29.1005	29.3686	28.6202	28.8289	30.6265	29.6594	28.9299	26.952	29.0131	29.1601	27.9084	29.4598	26.4942	30.635
hsa-miR-150-5p		25.5827	28.026	27.2778	27.8458	28.2731	27.9635	28.193	28.6192	25.4596	27.5935	27.5979	26.8165	27.506	30.8879	27.083	27.8257	32.4108	27.7924	27.9055	27.8292	29.0197	27.5081	26.0706	28.4766	27.1044	27.2655	27.2059	26.9632	28.1891	28.7977	28.8082	27.3486	28.7057	25.6188	27.9223	26.8328	27.598	25.7296	27.7123	26.2351	27.7668	25.6982	27.5353	27.0671	27.0841	26.7335	26.7102	27.11
hsa-miR-181a-5p		29.9237	28.192	29.3677	28.6324	29.3476	29.3038	29.113	30.9808	27.379	28.8164	28.8881	27.8034	30.5744	32.6195	28.8441	ND	34.2203	29.1179	29.797	29.7108	30.2771	28.728	28.671	29.6785	28.6872	29.9435	28.6401	29.6646	29.8133	29.268	29.7436	29.0281	29.4595	29.3491	28.7481	28.9026	29.6504	28.6036	29.8389	29.4887	28.6013	28.6094	28.7384	29.6404	27.3142	29.0781	28.0103	29.7385
hsa-miR-191-5p		28.2956	27.8118	29.0321	27.128	28.0732	28.749	28.2704	30.592	26.3369	28.6139	27.7554	27.0678	28.6615	30.0733	26.921	28.7345	31.6786	28.7266	28.6726	29.0791	29.8799	27.9597	27.2146	29.2489	27.9881	29.6893	27.5671	28.9467	28.218	28.0364	28.0743	28.9583	27.7695	26.8342	27.7374	27.97	28.7885	27.3314	28.6422	28.3103	27.9048	26.1171	27.7114	27.5475	26.8382	28.2525	26.8879	28.9131
hsa-miR-200a-3p		ND	33.6583	ND	34.5108	ND	ND	36.9711	34.153	35.2804	36.5924	36.4451	35.1647	ND	ND	33.801	34.0068	ND	38.4057	31.9608	35.6415	37.6989	35.6281	30.7672	34.2614	35.1349	35.5565	33.0358	35.8136	ND	36.0648	36.4683	32.1815	33.488	36.0521	37.3328	37.8923	34.4427	37.0252	ND	ND	30.5631	35.6609	38.3231	34.9804	33.3648	ND	33.1938	36.7295
hsa-miR-200c-3p		33.9041	31.6614	36.0988	31.8945	34.2104	36.5047	34.5612	32.5658	33.2844	33.7496	33.8531	31.1911	37.8019	ND	31.9758	29.677	35.7486	34.0896	30.2856	35.3189	34.8796	33.525	33.5915	33.1646	32.8831	33.5407	32.6764	35.3159	34.1792	33.843	35.2524	27.8826	29.0853	34.2567	33.8126	32.6814	30.7232	35.0346	33.1081	33.769	28.1957	33.2456	32.8916	33.7279	31.6645	34.7026	32.6022	32.8521
hsa-miR-203a		34.8445	34.5313	ND	35.542	35.7183	ND	37.6032	38.7319	34.8742	37.0457	ND	34.0971	37.6749	ND	36.6131	ND	36.2762	ND	33.818	34.816	ND	ND	33.771	35.6629	35.0617	ND	36.8478	35.4841	35.0572	35.5881	34.4919	33.1124	34.5904	35.6966	ND	35.8713	32.4764	ND	ND	35.8896	30.8633	ND	35.7539	36.8481	36.988	36.5624	34.5909	37.9502
hsa-miR-221-3p		28.1916	26.7436	28.8472	26.7698	27.1024	26.8965	27.5412	29.8828	28.3813	27.2689	26.7904	26.524	28.9203	30.8123	26.8512	27.6722	33.5948	28.2264	28.9326	28.7321	30.1481	27.3187	25.7024	28.561	27.373	29.7479	26.5756	29.0212	28.0365	27.8314	27.5065	27.8912	29.5244	27.7077	28.1583	27.8775	28.1547	28.351	28.2437	28.2848	27.0739	27.1409	27.2358	27.2095	26.3119	28.1286	27.2083	29.0513
hsa-miR-222-3p		26.437	26.3763	27.9873	26.7631	28.3946	28.541	27.701	30.3614	26.9619	28.2477	27.8166	27.612	27.9912	29.0979	27.0188	ND	30.1687	27.8213	28.1895	28.3877	28.8388	27.735	26.2252	28.337	27.928	28.025	26.8186	28.2787	27.3225	27.2947	27.1089	28.1437	30.6309	26.4402	27.7978	27.5464	27.6397	26.9308	28.1527	27.3623	27.5976	25.2817	27.2425	27.2326	27.0204	27.9846	25.7476	28.0319
hsa-miR-23b-3p		27.9783	26.4973	28.9832	26.6162	27.3812	27.3413	27.773	29.4583	27.5356	27.7049	27.031	26.6217	27.6519	31.0956	26.63	28.0655	33.2726	27.6307	28.0888	28.81	29.4675	27.2929	26.2754	28.379	26.9576	28.9628	26.7912	28.7887	28.2071	27.4826	27.9956	28.5597	26.9258	27.1329	27.8232	27.1644	27.8794	28.0031	27.8634	28.1492	27.0946	25.8785	27.0266	26.9309	25.7618	27.0229	27.2212	28.7299
hsa-miR-29a-3p		27.1586	27.6304	29.0187	27.392	30.8097	31.2211	30.0507	32.1351	26.0977	30.6525	29.7508	29.9412	30.1116	32.5071	28.305	29.9263	35.8352	30.9409	28.6003	29.7273	30.5057	30.4889	28.1159	30.555	28.4812	30.0866	28.226	30.3297	29.7698	30.2039	30.6112	29.8522	30.1384	28.4861	30.2341	29.8211	29.0462	28.5276	31.5451	29.8563	29.7536	26.8263	29.1061	29.9448	28.1241	28.3655	27.0628	30.0263
hsa-miR-320c		30.7852	29.7826	29.5611	29.1972	31.0603	31.5206	30.5358	31.8961	27.7453	30.6431	30.2386	30.4656	30.5633	30.1182	30.2725	ND	32.2762	32.4066	30.949	31.6234	31.0667	30.6068	30.3003	31.8574	31.6898	31.0256	30.5687	32.6262	30.0822	31.3827	30.2543	33.616	29.9723	28.7403	28.4937	30.1125	30.6074	30.088	30.9398	29.6552	30.3211	29.0794	30.6627	29.2907	30.247	31.1639	27.655	30.2592
hsa-miR-320d		ND	ND	ND	ND	31.2862	31.3231	ND	31.2467	ND	ND	30.8078	30.2507	30.7454	31.138	ND	ND	ND	ND	29.0189	ND	ND	31.455	ND	ND	31.846	30.0142	ND	32.754	ND	31.031	ND	31.0984	ND	ND	28.8029	ND	ND	30.8024	ND	30.6179	ND	ND	ND	ND	ND	31.6827	ND	ND
hsa-miR-32-5p		31.4671	28.5416	29.4635	26.0178	30.9262	32.3105	29.5928	32.8621	27.4681	31.1006	29.6715	30.1068	30.6052	29.6363	29.5029	29.2554	33.1797	32.4806	29.6158	29.1147	29.669	31.8124	30.0104	30.6704	29.8529	31.6374	29.1756	31.9366	31.093	30.5251	31.5219	30.1884	30.329	29.2436	27.873	30.8527	29.8402	29.2526	32.6959	30.6544	29.8055	28.7494	30.9808	31.9283	30.0062	30.5525	25.9152	30.5665
hsa-miR-335-5p		34.6749	33.2357	34.2393	32.8274	ND	ND	33.5248	36.0461	32.6526	33.4754	32.5786	32.0712	ND	ND	32.4802	34.0771	36.0258	34.9767	34.2368	ND	ND	ND	32.3661	34.7331	34.6207	34.113	33.1318	ND	35.3615	34.2174	34.7997	35.3765	33.2347	34.5051	32.9179	33.8378	34.1465	34.216	34.6858	34.085	34.1865	32.6773	32.9329	34.3552	32.6232	34.685	31.4594	34.7609
hsa-miR-423-3p		29.8598	27.7471	28.927	26.7264	28.6429	28.9198	28.7446	30.2446	29.3974	28.9629	28.0733	27.564	29.0449	29.6903	27.6967	28.9598	30.6846	28.3588	28.766	29.3268	29.8357	28.2933	27.7283	28.412	28.1893	29.6726	27.3096	29.6642	28.9321	27.3157	27.6475	28.5844	30.1376	27.7959	27.7109	28.2019	29.5528	28.9693	28.3551	28.8638	28.3716	27.6899	28.1831	28.1094	27.2285	28.7584	27.2605	28.7302
hsa-miR-450b-5p		ND	32.2313	34.1733	32.3321	34.3282	36.9868	35.0801	36.9443	32.2992	34.1993	34.8377	33.2068	33.938	35.2104	32.9293	35.5733	ND	34.3001	32.2502	34.7515	33.253	33.779	36.9243	33.2919	33.9561	33.9533	34.0228	37.4875	34.9742	33.3244	33.6623	33.5178	31.9494	34.0643	34.0602	33.8996	35.6966	34.5531	37.6446	39.4634	34.4653	30.5537	34.627	36.6755	33.5602	35.8883	32.903	34.4519
hsa-miR-92a-3p		26.2748	23.4665	24.6422	23.3172	25.8125	26.609	24.1767	27.4891	24.6284	25.7406	24.7108	25.4512	25.6536	24.2404	24.4741	25.2108	25.0962	26.3343	26.2159	25.089	27.6722	24.7941	24.3363	26.526	25.7435	26.0305	23.7857	24.7986	23.0071	26.2684	22.9174	26.6429	25.5296	22.053	23.7391	24.8349	24.645	23.163	25.9303	23.9033	24.6661	23.7158	25.0178	23.0508	24.6392	24.6816	21.2638	23.8214
UniSp6 CP		18.0964	17.8565	17.8949	17.8494	17.9779	18.1926	18.2201	18.1105	17.911	17.9125	18.0032	17.5923	17.9349	18.0519	17.7479	17.8145	18.3266	18.206	18.0882	17.9504	18.1031	18.1422	18.0673	17.8926	17.5695	17.9366	17.8458	17.9475	18.1405	17.9083	17.7515	17.8736	17.9171	17.9511	17.8989	17.9139	18.0744	17.9847	17.9965	18.2276	17.948	18.0083	17.8938	17.783	17.7446	17.6872	18.0152	18.0546
[truncated: 73 more columns]

## Sheet: Supplemental Dataset 5
Supplemental Dataset 5 Background Filtered qPCR data
design_target_name	layout_id	51193	51194	51195	51196	51197	51198	51199	51200	51201	51202	51203	51204	51205	51206	51207	51208	51209	51210	51211	51212	51213	51214	51215	51216	51217	51218	51219	51220	51221	51222	51223	51224	51225	51226	51227	51228	51229	51230	51231	51232	51233	51234	51235	51236	51237	51238	51239	51240
	Subject ID	1446	2525	80148	80091	80398	81099	50057	81106	80846	1286	80476	80103	80358	80542	1247	80261	80504	1024	80280	81070	80971	50782	81004	81195	80876	81102	80254	80872	2115	2110	81131	1863	50145	1789	81204	2224	70088	80014	1666	50655	80638	1809	81203	2324	81063	81118	81065	80198
	Sample Number	19	86	111	12	44	7	78	59	120	82	115	89	23	65	21	100	53	68	51	77	93	52	114	56	70	31	37	50	71	8	58	40	38	63	113	33	76	39	95	98	75	10	41	108	5	48	14	102
hsa-miR-29a-3p		27.1586	27.6304	29.0187	27.392	30.8097	31.2211	30.0507	32.1351	26.0977	30.6525	29.7508	29.9412	30.1116	32.5071	28.305	29.9263	35.8352	30.9409	28.6003	29.7273	30.5057	30.4889	28.1159	30.555	28.4812	30.0866	28.226	30.3297	29.7698	30.2039	30.6112	29.8522	30.1384	28.4861	30.2341	29.8211	29.0462	28.5276	31.5451	29.8563	29.7536	26.8263	29.1061	29.9448	28.1241	28.3655	27.0628	30.0263
hsa-miR-148b-3p		30.082	27.2923	29.0844	27.1958	29.0231	29.6007	28.6612	32.0809	27.102	29.013	28.25	28.2573	29.3546	30.1092	28.0223	29.8645	33.0182	30.0533	29.364	29.3283	30.989	29.4988	27.5377	29.9117	28.4637	30.8739	28.0152	30.8813	28.4218	29.3295	28.9626	30.0814	28.2878	27.5138	29.1005	29.3686	28.6202	28.8289	30.6265	29.6594	28.9299	26.952	29.0131	29.1601	27.9084	29.4598	26.4942	30.635
hsa-miR-92a-3p		26.2748	23.4665	24.6422	23.3172	25.8125	26.609	24.1767	27.4891	24.6284	25.7406	24.7108	25.4512	25.6536	24.2404	24.4741	25.2108	25.0962	26.3343	26.2159	25.089	27.6722	24.7941	24.3363	26.526	25.7435	26.0305	23.7857	24.7986	23.0071	26.2684	22.9174	26.6429	25.5296	22.053	23.7391	24.8349	24.645	23.163	25.9303	23.9033	24.6661	23.7158	25.0178	23.0508	24.6392	24.6816	21.2638	23.8214
hsa-miR-221-3p		28.1916	26.7436	28.8472	26.7698	27.1024	26.8965	27.5412	29.8828	28.3813	27.2689	26.7904	26.524	28.9203	30.8123	26.8512	27.6722	33.5948	28.2264	28.9326	28.7321	30.1481	27.3187	25.7024	28.561	27.373	29.7479	26.5756	29.0212	28.0365	27.8314	27.5065	27.8912	29.5244	27.7077	28.1583	27.8775	28.1547	28.351	28.2437	28.2848	27.0739	27.1409	27.2358	27.2095	26.3119	28.1286	27.2083	29.0513
hsa-miR-103a-3p		27.0554	25.9305	26.787	25.0083	26.4851	26.2663	26.2952	28.4918	24.4721	26.5937	25.9395	25.2103	27.4556	29.2315	25.2609	26.7584	32.0024	27.5487	27.1008	26.7378	28.3528	26.3931	26.8428	27.7605	26.2353	28.5921	25.8351	27.0414	27.3257	26.5675	27.1156	26.6623	28.6565	26.9745	26.3238	27.2135	27.2309	25.0507	27.3875	27.6246	26.7112	25.1124	26.5777	27.3137	25.0177	27.6389	25.3609	28.1933
hsa-miR-23b-3p		27.9783	26.4973	28.9832	26.6162	27.3812	27.3413	27.773	29.4583	27.5356	27.7049	27.031	26.6217	27.6519	31.0956	26.63	28.0655	33.2726	27.6307	28.0888	28.81	29.4675	27.2929	26.2754	28.379	26.9576	28.9628	26.7912	28.7887	28.2071	27.4826	27.9956	28.5597	26.9258	27.1329	27.8232	27.1644	27.8794	28.0031	27.8634	28.1492	27.0946	25.8785	27.0266	26.9309	25.7618	27.0229	27.2212	28.7299
hsa-miR-191-5p		28.2956	27.8118	29.0321	27.128	28.0732	28.749	28.2704	30.592	26.3369	28.6139	27.7554	27.0678	28.6615	30.0733	26.921	28.7345	31.6786	28.7266	28.6726	29.0791	29.8799	27.9597	27.2146	29.2489	27.9881	29.6893	27.5671	28.9467	28.218	28.0364	28.0743	28.9583	27.7695	26.8342	27.7374	27.97	28.7885	27.3314	28.6422	28.3103	27.9048	26.1171	27.7114	27.5475	26.8382	28.2525	26.8879	28.9131
hsa-miR-150-5p		25.5827	28.026	27.2778	27.8458	28.2731	27.9635	28.193	28.6192	25.4596	27.5935	27.5979	26.8165	27.506	30.8879	27.083	27.8257	32.4108	27.7924	27.9055	27.8292	29.0197	27.5081	26.0706	28.4766	27.1044	27.2655	27.2059	26.9632	28.1891	28.7977	28.8082	27.3486	28.7057	25.6188	27.9223	26.8328	27.598	25.7296	27.7123	26.2351	27.7668	25.6982	27.5353	27.0671	27.0841	26.7335	26.7102	27.11
hsa-miR-423-3p		29.8598	27.7471	28.927	26.7264	28.6429	28.9198	28.7446	30.2446	29.3974	28.9629	28.0733	27.564	29.0449	29.6903	27.6967	28.9598	30.6846	28.3588	28.766	29.3268	29.8357	28.2933	27.7283	28.412	28.1893	29.6726	27.3096	29.6642	28.9321	27.3157	27.6475	28.5844	30.1376	27.7959	27.7109	28.2019	29.5528	28.9693	28.3551	28.8638	28.3716	27.6899	28.1831	28.1094	27.2285	28.7584	27.2605	28.7302
hsa-miR-32-5p		31.4671	28.5416	29.4635	26.0178	30.9262	32.3105	29.5928	32.8621	27.4681	31.1006	29.6715	30.1068	30.6052	29.6363	29.5029	29.2554	33.1797	32.4806	29.6158	29.1147	29.669	31.8124	30.0104	30.6704	29.8529	31.6374	29.1756	31.9366	31.093	30.5251	31.5219	30.1884	30.329	29.2436	27.873	30.8527	29.8402	29.2526	32.6959	30.6544	29.8055	28.7494	30.9808	31.9283	30.0062	30.5525	25.9152	30.5665
hsa-miR-320c		30.7852	29.7826	29.5611	29.1972	31.0603	31.5206	30.5358	31.8961	27.7453	30.6431	30.2386	30.4656	30.5633	30.1182	30.2725	ND	32.2762	32.4066	30.949	31.6234	31.0667	30.6068	30.3003	31.8574	31.6898	31.0256	30.5687	32.6262	30.0822	31.3827	30.2543	33.616	29.9723	28.7403	28.4937	30.1125	30.6074	30.088	30.9398	29.6552	30.3211	29.0794	30.6627	29.2907	30.247	31.1639	27.655	30.2592
hsa-miR-222-3p		26.437	26.3763	27.9873	26.7631	28.3946	28.541	27.701	30.3614	26.9619	28.2477	27.8166	27.612	27.9912	29.0979	27.0188	ND	30.1687	27.8213	28.1895	28.3877	28.8388	27.735	26.2252	28.337	27.928	28.025	26.8186	28.2787	27.3225	27.2947	27.1089	28.1437	30.6309	26.4402	27.7978	27.5464	27.6397	26.9308	28.1527	27.3623	27.5976	25.2817	27.2425	27.2326	27.0204	27.9846	25.7476	28.0319
hsa-miR-1246		27.8803	24.5108	25.795	24.788	26.6833	27.1096	27.549	27.6371	22.8136	25.4186	26.5632	25.3388	25.0982	29.9903	25.0654	25.257	31.1958	25.7893	24.7422	ND	25.4478	26.7126	26.5684	26.0162	26.3543	27.1951	26.3869	27.941	27.8648	24.1139	26.4234	25.1692	25.038	26.1178	24.455	25.7142	27.3403	28.5949	25.5549	27.2032	27.2293	22.6188	25.9629	27.683	26.1423	27.5621	26.462	26.7257
hsa-let-7c-5p		32.697	30.8927	31.9823	29.5941	31.7854	31.385	31.6181	33.0849	28.5731	30.9869	30.6907	30.1674	31.8608	33.8789	29.8649	ND	BF	32.7985	31.4988	31.4924	32.9011	31.7516	31.7926	32.6045	31.3018	32.9779	31.2493	32.2684	32.5929	31.9725	32.3757	31.7384	31.4015	31.6847	30.3502	32.0191	31.5426	29.859	31.6077	31.5065	31.0228	30.2087	31.0619	32.093	29.5706	30.7627	30.2701	32.8842
hsa-miR-181a-5p		29.9237	28.192	29.3677	28.6324	29.3476	29.3038	29.113	30.9808	27.379	28.8164	28.8881	27.8034	30.5744	32.6195	28.8441	ND	34.2203	29.1179	29.797	29.7108	30.2771	28.728	28.671	29.6785	28.6872	29.9435	28.6401	29.6646	29.8133	29.268	29.7436	29.0281	29.4595	29.3491	28.7481	28.9026	29.6504	28.6036	29.8389	29.4887	28.6013	28.6094	28.7384	29.6404	27.3142	29.0781	28.0103	29.7385
hsa-miR-146b-5p		33.2021	ND	34.2673	33.4971	34.6238	34.5673	34.4155	35.537	31.5309	34.4896	34.3421	34.0665	34.3481	36.2523	33.1169	34.1154	BF	35.0931	33.999	34.3381	35.8115	34.5148	32.2948	36.2443	34.246	36.0764	33.9986	34.7677	34.8144	34.9392	ND	33.5994	33.9221	33.2132	33.5717	33.9086	34.0948	33.3618	35.7302	34.7399	34.1611	33.0549	34.1483	35.0697	33.0446	34.5539	34.7677	34.5976
hsa-miR-200c-3p		33.9041	31.6614	36.0988	31.8945	34.2104	36.5047	34.5612	32.5658	33.2844	33.7496	33.8531	31.1911	BF	ND	31.9758	29.677	35.7486	34.0896	30.2856	35.3189	34.8796	33.525	33.5915	33.1646	32.8831	33.5407	32.6764	35.3159	34.1792	33.843	35.2524	27.8826	29.0853	34.2567	33.8126	32.6814	30.7232	35.0346	33.1081	33.769	28.1957	33.2456	32.8916	33.7279	31.6645	34.7026	32.6022	32.8521
hsa-miR-335-5p		34.6749	33.2357	34.2393	32.8274	ND	ND	33.5248	36.0461	32.6526	33.4754	32.5786	32.0712	ND	ND	32.4802	34.0771	36.0258	34.9767	34.2368	ND	ND	ND	32.3661	34.7331	34.6207	34.113	33.1318	ND	35.3615	34.2174	34.7997	35.3765	33.2347	34.5051	32.9179	33.8378	34.1465	34.216	34.6858	34.085	34.1865	32.6773	32.9329	34.3552	32.6232	34.685	31.4594	34.7609
hsa-miR-450b-5p		ND	32.2313	34.1733	32.3321	34.3282	36.9868	35.0801	36.9443	32.2992	34.1993	34.8377	33.2068	33.938	35.2104	32.9293	35.5733	ND	34.3001	32.2502	34.7515	33.253	33.779	36.9243	33.2919	33.9561	33.9533	34.0228	BF	34.9742	33.3244	33.6623	33.5178	31.9494	34.0643	34.0602	33.8996	35.6966	34.5531	BF	BF	34.4653	30.5537	34.627	36.6755	33.5602	35.8883	32.903	34.4519
hsa-miR-200a-3p		ND	33.6583	ND	34.5108	ND	ND	36.9711	34.153	35.2804	36.5924	36.4451	35.1647	ND	ND	33.801	34.0068	ND	BF	31.9608	35.6415	BF	35.6281	30.7672	34.2614	35.1349	35.5565	33.0358	35.8136	ND	36.0648	36.4683	32.1815	33.488	36.0521	BF	BF	34.4427	BF	ND	ND	30.5631	35.6609	BF	34.9804	33.3648	ND	33.1938	36.7295
hsa-miR-1307-5p		35.3941	33.083	ND	31.6945	ND	ND	34.4107	33.9892	ND	ND	ND	ND	ND	35.6516	ND	35.1715	ND	36.3049	ND	35.3929	ND	35.8924	33.296	33.9943	36.0968	36.6665	31.9576	ND	BF	33.9702	ND	ND	ND	32.0653	33.0175	33.6087	33.9578	33.9102	ND	34.6646	34.7118	32.6781	32.9641	34.7458	33.6036	33.1653	32.3627	34.1684
hsa-miR-320d		ND	ND	ND	ND	31.2862	31.3231	ND	31.2467	ND	ND	30.8078	30.2507	30.7454	31.138	ND	ND	ND	ND	29.0189	ND	ND	31.455	ND	ND	31.846	30.0142	ND	32.754	ND	31.031	ND	31.0984	ND	ND	28.8029	ND	ND	30.8024	ND	30.6179	ND	ND	ND	ND	ND	31.6827	ND	ND
hsa-miR-203a		BF	BF	ND	BF	BF	ND	BF	BF	BF	BF	ND	BF	BF	ND	BF	ND	BF	ND	BF	BF	ND	ND	BF	BF	BF	ND	BF	BF	BF	BF	BF	BF	BF	BF	ND	BF	BF	ND	ND	BF	30.8633	ND	BF	BF	BF	BF	BF	BF
Count		19	20	19	21	19	19	21	22	20	20	21	21	18	19	20	17	16	20	21	19	18	21	21	21	22	22	21	19	19	22	19	21	20	21	21	20	21	21	18	20	22	21	20	21	21	21	21	21
Global mean		27.831	26.7939	28.0666	26.4444	27.9559	28.1741	27.7451	29.8882	26.6012	28.016	27.3221	27.0505	28.2622	29.8497	26.8049	28.1131	31.9548	28.4014	28.183	28.2955	29.5412	27.7275	26.6471	28.6478	27.3929	28.9912	26.8124	28.4928	27.7897	27.9815	27.7377	28.2868	28.4084	26.6797	27.6388	27.6983	27.9462	27.1061	28.4784	27.8763	27.5858	26.1257	27.4897	27.3704	26.546	27.6713	26.1633	28.3567
[truncated: 75 more columns]

## Sheet: Supplemental Dataset 6
Supplemental Dataset 6 Normalized qPCR data
8 group class	controls	serous borderline	serous inv, stage 3-4	serous inv, stage 3-4	endometrioma	endo/cc inv, stage 1-2	serous cystadenoma	endo/cc inv, stage 1-2	endo/cc inv, stage 3-4	serous cystadenoma	serous borderline	endo/cc inv, stage 1-2	serous cystadenoma	endo/cc inv, stage 3-4	serous borderline	endo/cc inv, stage 3-4	serous borderline	serous borderline	endo/cc inv, stage 3-4	serous inv, stage 1-2	endometrioma	endometrioma	serous borderline	endo/cc inv, stage 1-2	serous borderline	serous inv, stage 3-4	endometrioma	controls	controls	endometrioma	serous cystadenoma	serous inv, stage 1-2	serous inv, stage 3-4	controls	serous cystadenoma	serous inv, stage 1-2	serous inv, stage 1-2	controls	serous inv, stage 3-4	endometrioma	endo/cc inv, stage 1-2	controls	serous inv, stage 1-2	endometrioma	endo/cc inv, stage 1-2	controls	endometrioma	serous inv, stage 1-2	endometrioma
4 group class	Controls	Borderline	Cancer Advanced	Cancer Advanced	Benign	Cancer Early	Benign	Cancer Early	Cancer Advanced	Benign	Borderline	Cancer Early	Benign	Cancer Advanced	Borderline	Cancer Advanced	Borderline	Borderline	Cancer Advanced	Cancer Early	Benign	Benign	Borderline	Cancer Early	Borderline	Cancer Advanced	Benign	Controls	Controls	Benign	Benign	Cancer Early	Cancer Advanced	Controls	Benign	Cancer Early	Cancer Early	Controls	Cancer Advanced	Benign	Cancer Early	Controls	Cancer Early	Benign	Cancer Early	Controls	Benign	Cancer Early	Benign
2 group class	Controls+Borderline	Controls+Borderline	Cancer	Cancer	Controls+Borderline	Cancer	Controls+Borderline	Cancer	Cancer	Controls+Borderline	Controls+Borderline	Cancer	Controls+Borderline	Cancer	Controls+Borderline	Cancer	Controls+Borderline	Controls+Borderline	Cancer	Cancer	Controls+Borderline	Controls+Borderline	Controls+Borderline	Cancer	Controls+Borderline	Cancer	Controls+Borderline	Controls+Borderline	Controls+Borderline	Controls+Borderline	Controls+Borderline	Cancer	Cancer	Controls+Borderline	Controls+Borderline	Cancer	Cancer	Controls+Borderline	Cancer	Controls+Borderline	Cancer	Controls+Borderline	Cancer	Controls+Borderline	Cancer	Controls+Borderline	Controls+Borderline	Cancer	Controls+Borderline
Subject ID	50217	80675	2317	2601	81063	80627	81099	2110	2555	1809	81043	80091	2392	81065	80858	80098	2082	2622	1446	527	1247	81123	80358	2572	80357	81120	80292	50096	50831	1478	81102	80633	2224	50247	2579	2187	80254	50145	80014	1863	81203	50067	80704	80398	81034	50078	80556	81118	80840
Sample Number	1	2	3	4	5	6	7	8	9	10	11	12	13	14	15	16	17	18	19	20	21	22	23	24	25	26	27	28	29	30	31	32	33	34	35	36	37	38	39	40	41	42	43	44	45	46	47	48	49
hsa-miR-1246	-0.137393	0.590695	1.42641	1.35992	-0.0192654	1.46559	0.483393	2.82769	1.0748	3.78242	1.7816	1.07937	-0.554407	-0.151252	2.15842	0.217417	2.64039	-1.57138	0.577267	2.08051	1.41337	1.86671	3.15212	-0.337338	0.920024	2.47656	2.12594	0.301363	0.499	0.432322	1.9373	2.1962	1.99351	0.5218	2.57485	2.33724	0.185475	4.35898	-1.58492	2.45418	1.41751	1.20354	-0.576186	0.880701	0.182669	2.26683	2.83139	0.636499	1.30037
hsa-miR-1307-5p	-7.21703	-9.00376	-8.19303	-6.31226	-7.48049	-6.97822	-9.40696	-7.02856	-9.07248	-6.27694	-8.94733	-5.82712	-7.08701	-6.05195	-5.34504	-5.61372	-9.48328	-8.84907	-6.93653	-5.94739	-10.5212	-9.14463	-8.74972	-8.46235	-8.1551	-5.82198	-6.67359	-7.26842	-8.78769	-7.07032	-7.53411	-8.23974	-5.90098	-7.44697	-10.5098	-7.81313	-5.38523	-7.60299	-6.90015	-9.37662	-5.58373	-5.74881	-8.73473	-9.43598	-7.61048	-5.03341	-5.84154	-4.96669	-8.26959
hsa-miR-150-5p	0.452458	1.83439	1.01465	0.951586	-0.961018	1.14743	-0.370433	-1.85606	0.339012	0.702974	-0.0580917	-1.97849	0.910651	-0.399532	0.165853	-0.00347707	0.356442	0.80029	2.87484	0.139479	-0.604193	-0.0397245	0.744289	1.28335	1.04697	-0.67388	1.22683	1.50511	1.19718	-0.861509	1.86687	-0.374233	0.874936	-0.0111788	-0.817381	1.62254	-0.633497	0.69128	1.28041	0.274743	-0.154885	0.0840637	0.178581	-0.709087	-0.138248	1.23131	2.72755	1.46511	1.04258
hsa-miR-200a-3p	-7.43576	-3.98752	-9.17418	-8.81903	-7.24169	-7.19166	-9.40696	-9.12314	-6.30875	-9.25977	-8.94733	-8.6435	-7.94332	-6.8831	-8.47714	-6.90408	-9.48328	-8.95903	-8.54242	-8.76473	-7.32224	-6.81433	-8.74972	-6.41671	-8.1551	-3.77968	-5.02671	-2.0501	-7.96353	-9.86403	-6.4241	-5.46119	-10.1846	-8.79029	-10.5098	-4.37862	-6.4634	-4.09097	-10.0152	-4.55808	-10.9427	-7.70059	-5.7117	-9.43598	-6.87884	-6.41018	-8.58528	-8.80137	-8.26959
hsa-miR-200c-3p	-7.18498	-0.0384339	-5.75001	-6.84529	-5.54141	-5.39008	-8.91171	-6.90142	-4.58421	-6.84447	-8.02396	-6.0272	-6.58103	-6.29148	-7.80163	-5.72597	-7.18821	-5.87691	-5.44651	-4.41065	-5.49703	-8.86609	-9.55161	-5.42618	-7.13257	-0.419445	-6.64887	-0.544772	-6.53233	-6.02567	-4.40832	-1.92985	-4.97373	-5.63145	-5.9589	-1.97047	-6.10404	0.311732	-8.02461	-0.259179	-5.51122	-4.86606	-2.02532	-6.64642	-5.26511	-3.93982	-7.02075	-6.50398	-5.34932
hsa-miR-203a	-8.56988	-2.69047	-9.04152	-7.89395	-10.865	-7.05248	-9.40696	-8.64645	-8.11606	-10.5988	-8.94733	-9.67461	-8.95198	-8.28017	-9.77596	-10.702	-9.18043	-8.84907	-6.3869	-9.41051	-10.1343	-7.15284	-9.4246	-8.46235	-8.1551	-3.05863	-4.88092	-4.90344	-8.10314	-9.52771	-7.86763	-4.52901	-8.1636	-8.79029	-10.5098	-3.53583	-10.2755	-5.19341	-9.98998	-5.48905	-8.37353	-7.01672	-6.60328	-8.15432	-8.57961	-4.67046	-10.8107	-8.36377	-8.26959
hsa-miR-23b-3p	1.11414	1.81395	0.323258	0.420239	0.361288	1.15927	0.251718	-0.54099	1.1878	0.522649	0.00556678	-0.748869	-0.0770523	-0.910447	0.225387	0.572927	0.0797488	0.374231	0.479325	-0.230013	-0.151168	-0.064839	0.598413	0.213472	-0.104333	-0.100541	1.70259	0.985221	0.697383	0.328701	0.169597	-0.787072	0.543302	-0.402694	-1.23397	0.393267	-0.218859	2.4712	-0.993098	-0.936327	0.353785	0.610613	0.612694	0.182807	-1.07357	0.527863	0.146614	1.17575	0.130717
hsa-miR-29a-3p	-1.38368	-1.13592	-1.85746	-1.85598	-2.00106	-2.61473	-3.62806	-3.26225	-1.9979	-0.425174	-5.41382	-1.5246	-2.25416	-0.752061	-2.94639	-1.77149	-2.79345	-1.4444	1.29901	-2.05088	-1.82619	-2.10201	-1.86135	-2.51631	-3.14493	-0.570997	-1.02953	-2.10307	-1.11711	-2.59198	-0.954234	-3.8386	-2.11344	-4.47416	-3.36141	-3.14515	-1.65359	-0.741396	-1.51757	-2.22886	-1.72573	-0.861875	-2.91252	-3.24566	-2.79875	-2.0955	-0.137075	-0.166839	-3.20413
hsa-miR-320c	-1.03243	-1.6414	-3.74158	-1.48875	-4.12394	-2.38554	-3.92755	-4.44112	-2.88782	-2.67819	-2.05993	-3.32986	-0.641948	-1.34429	-3.21835	-1.46032	-1.59281	-2.39552	-2.3276	-1.70215	-3.79375	-1.29264	-2.31302	-0.96893	-2.6245	-2.22741	-1.09408	-3.35981	-2.07629	-1.74643	-1.89323	-1.44864	-2.40486	-2.84439	-1.31747	-1.89368	-3.9963	-0.575291	-3.07797	-5.99264	-3.28232	-1.39742	-3.63956	-3.49626	-1.54056	-0.458588	0.464653	-2.96529	-1.47006
hsa-miR-320d	-9.34122	-8.09029	-9.04152	-9.78569	-10.8769	-8.57593	-3.73004	-4.08941	-3.62096	-10.5988	-8.94733	-11.1326	-8.95198	-10.6893	-9.64549	-10.702	-2.36981	-2.9541	-8.54242	-0.715628	-10.5212	-1.66402	-2.49509	-8.46235	-8.1551	-1.6081	-8.93734	-2.88582	-2.78971	-10.7126	-0.881802	-2.40139	-9.29231	-8.79029	-1.87938	-1.75928	-10.4276	-7.60299	-3.79241	-3.47498	-9.61961	-1.75854	-8.36319	-3.72216	-2.32693	-8.8775	-0.850881	-3.48403	-1.85072
hsa-miR-32-5p	-1.86593	-6.70774	-4.30648	-2.98232	-3.88309	-4.5258	-4.71748	-3.58345	-5.70119	-2.34824	-8.42568	-0.150491	-2.67316	0.39549	-4.74342	-1.84684	-4.10303	-2.04514	-3.00951	-1.31357	-3.02409	-2.29891	-2.35494	-3.04699	-4.2135	0.100581	-4.70582	-4.80885	-3.96575	-4.32931	-2.50503	-2.5801	-3.14499	-4.61508	-3.46171	-4.406	-2.60326	-0.93203	-2.24262	-2.56502	-3.60043	-2.32352	-3.50485	-3.36213	-2.60821	-2.44055	-1.2987	-2.35388	-3.57011
hsa-miR-335-5p	-4.37339	-3.98033	-9.04152	-6.14781	-6.50014	-6.18862	-9.40696	-7.27576	-6.60349	-6.27613	-6.98801	-6.9601	-5.96209	-5.14869	-7.30446	-6.00468	-5.72219	-5.33434	-6.21733	-3.86657	-6.00143	-5.0577	-8.74972	-5.32972	-7.44527	-5.83103	-6.70247	-5.50004	-4.52177	-4.98567	-4.9806	-6.36915	-6.13008	-7.02996	-6.5957	-5.9442	-6.55943	-3.83767	-7.20593	-7.75308	-5.55253	-4.21902	-8.36319	-9.43598	-6.35429	-6.41603	-5.41557	-6.48635	-5.41281
hsa-miR-450b-5p	-7.43331	-6.82294	-8.26863	-6.80671	-7.43712	-6.78939	-9.39381	-6.38276	-8.51928	-4.15252	-8.94733	-6.46473	-8.95198	-6.59225	-5.63975	-7.32608	-6.70189	-8.95807	-8.54242	-6.42184	-6.45055	-4.79523	-5.68775	-9.21517	-8.1551	-5.73435	-5.58241	-7.76598	-7.60217	-9.16176	-4.82092	-6.92851	-6.19193	-8.79029	-7.58569	-7.81313	-7.45046	-2.55237	-7.54306	-5.89443	-7.24664	-5.93741	-10.8425	-6.76415	-8.09828	-6.51593	-6.4098	-7.68969	-7.4228
hsa-miR-92a-3p	4.92596	3.92007	3.28323	3.95085	1.48393	2.80859	0.984039	0.673231	2.39845	2.68533	2.22521	2.55013	5.21794	5.04694	1.78685	4.17838	2.66964	4.08961	2.18282	2.50237	2.0047	2.40747	2.5967	4.60341	3.39331	3.03366	3.25643	2.31795	2.47953	2.69127	3.10187	2.52274	2.87277	2.42215	2.60969	3.84801	2.78665	3.8674	3.847	0.9805	2.36254	3.14464	3.14927	1.75155	3.29066	5.76677	4.19497	3.51707	4.07368
[truncated: 70 more columns]

## Sheet: Supplemental Dataset 7
Supplemental Dataset 7 Normalized expression data from the Keller et al. dataset with random assignment to the training and testing set for a neural network build to distinguish ovarian cancer patients from controls using the 14-miRNA subset.
ID_REF	Set	Diagnosis	hsa-miR-29a*	hsa-miR-200a*	hsa-miR-320c	hsa-miR-1307	hsa-miR-320d	hsa-miR-200c*	hsa-miR-92a	hsa-miR-450b-3p	hsa-miR-23b*	hsa-miR-1246	hsa-miR-335	hsa-miR-150	hsa-miR-32	hsa-miR-203	Neural Netwok prediction
GSM783702	Training	ovarian cancer	1	70.9152	419.729	121.42	486.083	8.72797	15762.4	1	1	17.3513	335.313	410.007	136.959	1	ovarian cancer
GSM783704	Training	ovarian cancer	1	1	260.937	84.0341	294.73	51.8844	11992.2	8.52533	35.6905	17.2412	543.262	1831.86	115.235	26.6993	ovarian cancer
GSM783706	Training	ovarian cancer	1	50.3469	1029.5	152.683	1146.04	31.2528	15762.4	1	16.6949	1	335.313	1551.75	103.752	1	ovarian cancer
GSM783709	Training	ovarian cancer	1	44.598	363.627	131.075	384.192	9.11233	11992.2	44.598	31.0297	31.0297	431.107	1551.75	197.826	1	ovarian cancer
GSM783719	Training	ovarian cancer	86.2214	1	635.854	96.0088	467.57	8.21696	9218.62	1	1	14.0826	337.741	396.306	18.2952	1	ovarian cancer
GSM783721	Training	ovarian cancer	1.27423	84.7709	423.354	126.724	508.488	1	15762.4	19.5385	1	1	441.567	629.294	63.5407	1	ovarian cancer
GSM783744	Training	ovarian cancer	1	50.0341	445.409	53.1927	622.733	41.7819	11992.2	1	1	1	445.409	1128.52	148.671	2.15088	ovarian cancer
GSM783746	Training	ovarian cancer	1	14.543	309.043	50.7996	335.313	25.1999	12999.7	9.64427	1	1	348.816	185.618	140.983	14.543	ovarian cancer
GSM783754	Training	ovarian cancer	43.2764	23.8667	895.472	76.2544	513.275	100.219	11106.7	1	6.67731	1	283.646	337.741	164.393	1	ovarian cancer
GSM783755	Training	ovarian cancer	1	56.223	381.394	56.223	437.726	54.6685	10422	8.72797	1	1	553.494	92.3778	259.526	16.8359	ovarian cancer
GSM783760	Training	ovarian cancer	1	68.8095	402.677	20.2544	517.998	61.6465	9218.62	11.1509	1	1	731.209	100.642	176.812	1	ovarian cancer
GSM783703	Testing	ovarian cancer	1	40.761	357.671	67.0562	513.275	23.2015	12999.7	14.6795	1	1	393.358	998.007	206.978	23.2015	ovarian cancer
GSM783718	Testing	ovarian cancer	6.50991	90.3601	697.328	58.5584	774.174	58.5584	9818.04	32.783	1	6.50991	642.108	2305.68	126.283	1	ovarian cancer
GSM783745	Testing	ovarian cancer	6.50991	18.6575	895.472	72.4317	1223.93	31.609	11992.2	1	1	12.4196	188.046	850.551	93.2236	1	ovarian cancer
GSM783758	Testing	ovarian cancer	1	30.7037	1204.7	24.7456	829.216	55.6454	8664.94	1	1	1	290.919	1	176.812	55.6454	control
GSM783369	Training	control	1	43.2764	508.488	78.3084	320.701	1.27423	15762.4	1	1	1	88.9967	800.878	67.0562	1	control
GSM783370	Training	control	1	80.4218	1919.13	96.4141	1621.45	42.6492	12999.7	26.0507	1	1	107.49	1243.16	143.499	1	control
GSM783371	Training	control	1	78.9769	533.443	156.424	459.782	42.5958	11992.2	68.9152	48.5496	1	348.816	1097.2	83.8756	7.48568	control
GSM783373	Training	control	1	66.5099	774.174	87.2687	800.878	43.0385	9818.04	66.5099	15.12	1	543.262	1551.75	116.642	5.57819	control
GSM783374	Training	control	1	85.5914	533.443	149.252	576.16	67.3293	17656.2	56.0854	22.4163	1	427.23	2633.57	117.563	1	control
GSM783375	Training	control	6.67731	68.8095	810.722	68.8095	969.972	56.0854	11992.2	33.6553	6.67731	1	616.821	895.472	145.728	1	control
GSM783377	Training	control	1	85.446	402.677	85.446	477.077	77.7346	11992.2	17.0033	36.7192	1	688.936	2208.09	101.074	1	control
GSM783378	Training	control	8.34912	85.0661	586.933	126.045	559.482	8.34912	9818.04	78.609	8.34912	1	467.57	598.053	78.609	28.1156	control
GSM783379	Training	control	1	110.369	105.373	39.8139	116.933	33.2852	20492.2	53.8403	46.8667	1	499.64	1327.79	249.613	16.554	control
GSM783404	Training	control	16.2445	134.917	459.782	60.4042	1128.52	31.0782	14167.1	46.4482	38.0518	1	508.488	1621.45	230.574	31.0782	control
GSM783405	Training	control	26.0507	130.767	1065.77	101.454	1919.13	71.9383	15762.4	41.4262	59.6377	1	543.262	2112.11	675.139	6.50991	control
GSM783406	Training	control	1	120.436	513.275	26.4967	1204.7	37.9686	10422	19.3403	26.4967	1	481.58	1493.64	285.457	13.4427	control
GSM783408	Training	control	1	130.458	1029.5	47.8618	2208.09	27.3293	14167.1	17.8535	17.8535	1	406.342	1163.55	360.86	29.989	control
GSM783409	Training	control	1	87.7081	791.034	31.2528	983.99	15.75	15762.4	44.0804	31.2528	1	756.492	2112.11	441.567	57.8227	control
GSM783410	Training	control	1	78.9769	111.127	19.9444	188.567	41.1531	30613.8	33.8491	33.8491	1	697.328	3146.8	285.457	33.8491	control
GSM783418	Training	control	1	111.127	648.363	154.191	437.726	30.7654	20492.2	56.0055	44.598	1	325.555	1097.2	148.34	1	control
GSM783419	Training	control	1	126.926	1352.46	59.4747	1013.75	38.8976	15762.4	2.04956	59.4747	1	183.318	2414.51	152.683	126.926	control
GSM783428	Training	control	1	147.627	3224.01	49.1178	5384.26	35.1487	17656.2	35.1487	1	35.1487	739.904	850.551	131.374	35.1487	control
GSM783521	Training	control	1	20.9064	2208.09	101.568	1919.13	42.2126	11106.7	20.9064	20.9064	51.8844	517.998	4302.77	109.12	1	control
GSM783523	Training	control	27.1883	45.4438	622.733	27.1883	722.514	81.761	11992.2	81.761	1	62.8508	406.342	4001.55	100.642	14.3954	control
GSM783524	Training	control	1	17.3513	635.854	112.978	714.117	1	11992.2	17.3513	48.7037	100.219	366.394	2009.8	126.521	1	control
GSM783526	Training	control	49.3205	49.3205	697.328	1	774.174	49.3205	12999.7	1.27423	81.4703	1.27423	648.363	3793.31	124.988	1	control
GSM783642	Training	control	54.3436	54.3436	943.304	54.3436	2517.8	54.3436	11106.7	54.3436	54.3436	54.3436	722.514	2633.57	54.3436	54.3436	control
GSM783643	Training	control	604.481	51.3271	3001.96	51.3271	4405.66	51.3271	24752.8	51.3271	51.3271	51.3271	51.3271	3453.17	51.3271	51.3271	control
GSM783653	Training	control	18.0573	1	1282.72	73.9747	3626.4	100.642	11106.7	29.6366	73.9747	1	243.306	756.492	73.9747	1	control
GSM783654	Training	control	53.0385	67.7522	2941.27	14.2941	4001.55	53.0385	12999.7	105.638	28.4108	14.2941	262.66	5651.93	40.8271	2.48128	control
GSM783655	Training	control	33.0518	50.5584	4001.55	93.6112	4199.87	50.5584	10422	17.0033	50.5584	50.5584	375.465	1184.12	50.5584	17.0033	control
GSM783657	Training	control	72.3128	1	2880.58	72.3128	2633.57	54.1134	11992.2	39.6289	54.1134	109.477	195.131	1688.56	54.1134	1	control
GSM783658	Training	control	59.6377	5.0011	1013.75	219.399	616.821	49.9328	30613.8	123.517	81.4703	69.8667	1	2941.27	49.9328	37.8855	control
GSM783666	Training	control	1	61.3778	586.933	142.274	441.567	39.7214	15762.4	69.576	1	4.68392	748.198	2009.8	131.674	1	control
GSM783669	Training	control	1	8.09361	850.551	44.7081	1243.16	15.2302	7721.73	40.6949	40.6949	44.7081	240.774	269.389	179.706	34.9548	control
GSM783670	Training	control	1	39.272	1377.13	76.7742	1551.75	1	11106.7	8.34912	17.7401	29.0319	360.86	654.838	106.052	8.34912	control
GSM783671	Training	control	74.076	48.5496	872.737	98.5033	810.722	35.6905	10422	48.5496	1	57.0121	406.342	1493.64	141.644	1	control
GSM783691	Training	control	1	4.15529	1097.2	139.57	635.854	57.1619	11992.2	15.75	57.1619	36.7192	456.318	3453.17	231.798	36.7192	control
GSM783692	Training	control	1	65.0033	604.481	1	318.34	76.7742	24752.8	148.34	114.411	101.264	363.627	4865.87	410.007	40.196	control
GSM783693	Training	control	1	22.9499	486.083	55.8822	213.504	213.504	11106.7	37.8855	55.8822	1	427.23	6578.18	178.737	22.9499	control
GSM783707	Training	control	12.6927	23.1002	998.007	106.458	1327.79	52.8139	12999.7	52.8139	52.8139	3.57379	357.671	1621.45	115.235	1	control
GSM783708	Training	control	29.989	1	969.972	138.793	919.621	64.6498	17656.2	83.6156	8.21696	83.6156	290.919	1688.56	102.203	53.7566	control
GSM783715	Training	control	46.9681	46.9681	1919.13	46.9681	2517.8	46.9681	11106.7	46.9681	46.9681	46.9681	298.637	2009.8	46.9681	46.9681	control
GSM783717	Training	control	48.2456	48.2456	2112.11	48.2456	2633.57	48.2456	11992.2	48.2456	48.2456	48.2456	592.493	1097.2	48.2456	48.2456	control
GSM783720	Training	control	1	35.1487	1128.52	20.9064	943.304	104.58	12999.7	20.9064	74.2907	1	490.831	3301.22	156.424	1	control
GSM783729	Training	control	1	8.62665	174.744	86.9152	162.715	1	7721.73	21.6795	49.5496	1	490.831	1762.07	190.49	1	control
GSM783747	Training	control	4.68392	1	829.216	1	1223.93	75.8579	4645.12	75.8579	24.8557	1	300.673	538.352	59.6377	42.5958	control
GSM783748	Training	control	1	30.7037	325.555	11.5209	434.416	62.0826	6233.19	16.6949	1	1	819.969	247.006	316.099	41.1531	control
GSM783749	Training	control	1	22.13	581.547	30.1035	731.209	40.761	8664.94	26.5628	1	6.59361	357.671	311.45	175.753	1	control
GSM783757	Training	control	1	85.8337	203.393	17.0033	399.492	35.0385	9818.04	28.7632	1	1	441.567	163.547	217.408	2.04956	control
GSM783759	Training	control	1	94.5727	1327.79	27.4433	1377.13	58.3337	9218.62	27.4433	3.34471	1	884.104	170.539	196.53	1	control
GSM783761	Training	control	1	62.5991	756.492	33.4923	943.304	53.8403	11106.7	66.3337	14.2941	1	434.416	2305.68	154.591	2.56388	control
GSM783803	Training	control	1	73.9747	1377.13	15.2302	983.99	46.2764	11106.7	1	1	1	642.108	1433.03	159.322	15.2302	control
GSM783804	Training	control	53.8403	100.642	522.721	28.7632	406.342	28.7632	14167.1	1	1	2.2522	629.294	1919.13	176.812	28.7632	control
GSM783805	Training	control	1	75.2941	410.007	32.0606	437.726	61.0385	9818.04	1.49449	1.49449	1.49449	688.936	1551.75	150.472	32.0606	control
GSM783807	Training	control	1	10.2059	592.493	88.4482	543.262	38.8976	8664.94	1	27.5573	1	675.139	791.034	150.856	27.5573	control
GSM783808	Training	control	1	60.9284	565.469	27.0474	307.109	27.0474	11106.7	1.913	37.8855	27.0474	629.294	3001.96	154.191	1.913	control
GSM783372	Testing	control	2.15088	88.2368	648.363	58.88	616.821	36.3667	7721.73	58.88	1	1	481.58	810.722	142.274	2.15088	control
GSM783376	Testing	control	1	68.5055	570.814	102.73	635.854	68.5055	12999.7	47.1178	68.5055	1	280.175	1762.07	109.684	31.8932	control
GSM783381	Testing	control	1	85.7368	209.341	102.371	159.702	57.9813	30613.8	1	57.9813	1	235.146	4865.87	151.95	1	control
GSM783407	Testing	control	1	206.978	1029.5	40.6421	1377.13	76.7742	20492.2	1	23.7346	1	243.306	3001.96	782.604	36.2577	control
GSM783411	Testing	control	27.0474	105.506	100.369	27.0474	128.708	59.6377	30613.8	1	20.033	1	616.821	3301.22	538.352	7.06057	control
GSM783429	Testing	control	1	85.9306	1305.26	1	2360.09	3.57379	17656.2	26.4306	19.3403	63.7434	765.333	1551.75	378.597	1	control
GSM783525	Testing	control	95.2863	27.7764	1029.5	108.283	810.722	3.23073	14167.1	15.4416	1	19.9444	316.099	4865.87	58.0826	1	control
GSM783644	Testing	control	44.2203	44.2203	850.551	44.2203	1621.45	44.2203	12999.7	44.2203	44.2203	44.2203	969.972	2759.77	44.2203	44.2203	control
GSM783656	Testing	control	195.83	1	2880.58	68.5055	2517.8	118.246	11992.2	139.181	10.2059	53.2588	363.627	3793.31	25.0457	1	control
GSM783668	Testing	control	9.19604	34.5441	1128.52	34.5441	1377.13	1	9818.04	92.5452	34.5441	42.6492	335.313	969.972	199.34	1	control
GSM783690	Testing	control	1	47.6371	895.472	129.643	895.472	60.3513	15762.4	1	30.2621	30.2621	499.64	3301.22	129.643	1	control
GSM783705	Testing	control	1	77.7346	598.053	77.7346	1204.7	53.576	12999.7	31.8932	1	1	416.105	1029.5	141.644	1	control
GSM783716	Testing	control	53.2588	53.2588	1223.93	53.2588	1128.52	53.2588	9818.04	53.2588	53.2588	53.2588	522.721	782.604	53.2588	53.2588	control
GSM783730	Testing	control	1	1	486.083	67.7522	302.924	1	9818.04	5.19493	1	18.582	320.701	1163.55	138.106	1	control
GSM783756	Testing	control	1	74.076	348.816	30.8271	296.602	54.8271	7721.73	15.9967	1	1	553.494	168.291	245.82	13.2665	control
GSM783802	Testing	control	101.454	166.731	648.363	138.449	1146.04	60.1839	11106.7	20.6685	8.97137	1	559.482	969.972	60.1839	60.1839	control
GSM783806	Testing	control	11.2919	108.75	495.579	11.2919	369.364	30.1828	14167.1	1	49.4615	1	565.469	1688.56	141.349	30.1828	control

## Sheet: Supplemental Dataset 8
Supplemental Dataset 8 Normalized expression data of preoperative and postoperative miRNA expression in samples from optimally cytoreduced cancer patients in the ERASMOS study. Data reflect background substraction, merged replicates, and normalization using global normalization to the average expression across all miRNAs and all samples.
ID	Sample	Time point	Diagnosis	Residual Disease	Anesthetic (Volatile or Combined Volatile/Epidural)	hsa-let-7b-5p	hsa-let-7d-3p	hsa-let-7e-5p	hsa-let-7i-5p	hsa-mir-122-5p	hsa-mir-142-3p	hsa-mir-142-5p	hsa-mir-150-5p	hsa-mir-15b-5p	hsa-mir-183-5p	hsa-mir-191-5p	hsa-mir-202-3p	hsa-mir-20a-5p	hsa-mir-21-5p	hsa-mir-29a-3p	hsa-mir-29c-3p	hsa-mir-361-5p	hsa-mir-486-5p	hsa-mir-574-3p	hsa-mir-590-5p	hsa-mir-92a-3p	hsa-mir-92b-3p	hsa-mir-93-5p	hsa-mir-98-5p	hsa-mir-99a-5p	hsa-mir-99b-5p	hsa-mir-10a-3p	hsa-mir-1185-1-3p	hsa-mir-1246	hsa-mir-125a-5p	hsa-mir-127-3p	hsa-mir-130b-3p	hsa-mir-136-3p	hsa-mir-200a-3p	hsa-mir-200b-3p	hsa-mir-200c-3p	hsa-mir-21-3p	hsa-mir-30c-5p	hsa-mir-320d	hsa-mir-323a-3p	hsa-mir-323b-3p	hsa-mir-328-3p	hsa-mir-329-3p	hsa-mir-370-3p
E1001	E1001-05_A	Preop	Cancer	NED	Epidural	3.26775	1.01256	0.169348	1.45113	0.220369	0.009159	0.014316	1.13882	0.886363	0.062352	2.54334	0.009838	1.4151	0.324923	1.03644	0.178304	0.098244	25.4109	0.269356	0.049325	12.168	2.17791	2.68609	0.069408	0.112424	0.474052	0.016962	0.006446	0.105503	0.041591	0.077482	1.33219	0.007531	0.113238	0.016012	0.299005	0.256532	0.455665	5.39614	0.020558	0.035824	0.500716	0.010041	0.014927
E1003	E1003-6_A	Preop	Cancer	NED	Epidural	3.32326	1.24162	0.143165	1.6265	0.224313	0.007901	0.003628	1.83819	2.21183	0.042239	4.72971	0.005814	2.43341	0.356496	1.52711	0.315202	0.392772	20.3106	0.506767	0.020076	9.48049	2.14782	5.97978	0.061271	0.106094	0.467112	0.001093	0.00641	0.005317	0.022461	0.045966	2.29894	0.004423	0.031803	0.00815	0.036325	0.096404	0.774164	2.87369	0.005019	0.006361	0.53549	0.005516	0.00492
E1007	E1007-06_A	Preop	Cancer	NED	Epidural	6.19307	0.688709	0.148003	2.62263	0.023591	0.006208	0.001341	0.776766	2.65501	0.04013	5.4245	0.006208	3.52609	0.174623	1.09457	0.276586	0.270676	16.5591	0.156843	0.0223	10.8011	2.39044	5.93307	0.060989	0.119842	0.18257	0.001838	0.002036	0.049169	0.009933	0.051056	1.92672	0.005712	0.000993	0.003973	0.021753	0.118104	0.797824	1.85023	0.05046	0.070525	0.473857	0.007599	0.001838
E1008	E1008-06_A	Preop	Cancer	NED	Epidural	4.95794	1.28351	0.146103	2.67438	0.379205	0.014759	0.009747	1.07592	2.6779	0.061317	5.2498	0.00591	3.378	0.289614	1.09292	0.28754	0.175829	19.6272	0.346369	0.034703	10.5129	2.16926	3.61342	0.059589	0.111055	0.431086	0.004632	0.010508	0.003906	0.030347	0.08254	1.55183	0.006256	0.005703	0.006567	0.021188	0.187442	0.81634	1.36398	0.076387	0.168674	0.353766	0.005807	0.006014
E1009	E1009-05_A	Preop	Cancer	< 1 cm	Epidural	2.16575	1.29445	0.079816	2.03593	2.36549	0.008138	0.001948	0.407951	2.09063	0.025493	6.18965	0.005286	3.21443	0.652373	0.886884	0.323335	0.223521	16.9248	1.12682	0.016033	11.0222	2.56244	4.83103	0.03537	0.199837	0.524528	0.001982	0.036378	0.026814	0.028762	0.1773	1.68477	0.014259	0.026466	0.005843	0.039821	0.22366	0.543378	1.78097	0.126941	0.461161	0.796843	0.01179	0.005704
E1011	E1011-06_A	Preop	Cancer	< 0.5 cm	Epidural	2.45736	0.790514	0.169078	1.98021	4.83347	0.013342	0.007123	1.15211	1.43479	0.022463	4.19971	0.006784	3.22278	0.685547	1.61808	0.51873	0.191165	19.8659	0.760551	0.031999	10.8323	2.23085	4.49411	0.039914	0.321045	0.479382	0.001093	0.003543	0.001319	0.038067	0.122606	1.13161	0.01436	0.008706	0.007387	0.023933	0.156414	0.619288	1.20439	0.015981	0.029021	0.316786	0.003656	0.005955
E1015	E1015-05_A	Preop	Cancer	< 0.5 cm	Epidural	4.16929	0.596479	0.144114	2.52656	0.219695	0.002841	0.004452	1.33562	1.98381	0.034308	4.02837	0.006364	3.39829	0.301176	0.703335	0.322591	0.167906	18.6511	0.284077	0.00549	13.0213	2.79479	5.66197	0.055286	0.061732	0.603881	0.00325	0.00336	0.002813	0.052991	0.100328	1.71976	0.019749	0.008167	0.011145	0.226742	0.15209	0.442067	1.43057	0.024747	0.101612	0.503389	0.004616	0.018574
E1016	E1016-05_A	Preop	Cancer	NED	GA	3.39376	0.86276	0.101814	2.18531	0.152164	0.033814	0.008	1.43142	2.17579	0.038763	6.21474	0.006186	3.19644	0.207216	1.02833	0.31571	0.231669	19.2336	0.324329	0.046309	11.1467	2.36061	5.50254	0.045113	0.180948	0.456246	0.000701	0.002186	0.025814	0.022515	0.117402	1.44688	0.004041	0.010969	0.00268	0.086309	0.017814	1.02391	1.73129	0.033567	0.037319	0.458926	0.015794	0.003629
E1017	E1017-05_A	Preop	Cancer	< 0.5 cm	GA	3.69692	0.41928	0.110074	2.90682	1.25924	0.006824	0.004804	0.963981	1.38811	0.041955	2.97546	0.003301	3.00835	0.51127	0.8155	0.479761	0.089059	18.9451	0.215639	0.048213	12.981	3.92439	4.83336	0.056958	0.160725	0.418023	0.005272	0.023626	0.021655	0.035106	0.12047	1.28797	0.006701	0.016038	0.005223	0.04363	0.070828	0.429947	3.06417	0.041709	0.085709	0.361114	0.012367	0.003006
E1019	E1019-04_A	Preop	Cancer	NED	Epidural	7.02844	0.513906	0.306716	4.99172	0.012188	0.04558	0.011512	0.185068	5.0146	0.188365	6.83805	0.022022	5.35008	0.360711	0.492042	0.530502	0.041481	7.44423	0.48493	0.03891	6.80972	2.94957	6.65108	0.260618	0.033317	0.130956	0.005326	0.001937	0.047801	0.126097	0.181136	1.33657	0.011654	0.015335	0.013991	0.048018	0.066993	2.58579	1.28143	0.025795	0.041181	0.510015	0.005944	0.009859
E1020	E1020-05_A	Preop	Cancer	NED	Epidural	5.29579	0.543876	0.113159	2.49389	1.44998	0.010175	0.00206	1.31536	1.76957	0.054166	3.80606	0.00498	3.82011	0.401667	1.43535	0.543108	0.140119	18.6434	0.473724	0.028897	11.8453	2.21633	5.92989	0.070674	0.204123	0.423647	0.00166	0.003873	0.010175	0.032033	0.052998	0.983017	0.002644	0.006855	0.003812	0.020689	0.083617	0.440862	1.00303	0.009745	0.024593	0.405325	0.003689	0.004796
E1021	E1021-05_A	Preop	Cancer	NED	Epidural	2.80496	0.34204	0.106484	1.93912	0.950753	0.005127	0.002343	0.614769	1.47539	0.047518	3.78246	0.005304	2.51981	0.249921	0.625378	0.331519	0.102683	22.5358	0.300931	0.026389	13.8917	2.67678	5.59123	0.04544	0.102064	0.464878	0.004067	0.002564	0.015648	0.070415	0.134508	1.45435	0.017372	0.018079	0.003094	0.018211	0.022543	0.406885	2.23117	0.012642	0.05627	0.354372	0.009725	0.004111
E1022	E1022-05_A	Preop	Cancer	NED	Epidural	3.3993	0.794081	0.111224	2.15129	0.515559	0.004504	0.010034	1.16816	1.84467	0.049019	4.00964	0.004429	3.16814	0.312203	0.800012	0.265336	0.119631	19.1621	0.374058	0.017541	12.0099	3.43651	6.772	0.046266	0.096311	0.289382	0.004404	0.004129	0.003203	0.072339	0.114001	1.16031	0.004629	0.021569	0.010985	0.075092	0.108797	0.627483	2.37994	0.023496	0.083374	0.344206	0.006431	0.006105
E1024	E1024-05_A	Preop	Cancer	< 0.5 cm	Epidural	5.53488	0.620331	0.098938	2.59704	0.201913	0.006879	0.002188	2.64325	2.40002	0.045218	4.48634	0.003992	3.65963	0.402857	1.57692	0.515101	0.171896	16.0534	0.282178	0.022598	11.1636	2.68254	7.42359	0.076656	0.094946	0.210619	0.003067	0.003879	0.004939	0.034641	0.090391	0.928287	0.007668	0.009021	0.005706	0.01944	0.034708	0.355248	1.15293	0.040324	0.095127	0.332673	0.003225	0.003067
E1026	E1026-03_A	Preop	Cancer	NED	Epidural	4.51931	0.840548	0.142202	2.94855	0.040836	0.006729	0.002106	0.663992	2.09496	0.050437	5.7599	0.006537	2.48666	0.257353	1.1685	0.477316	0.132027	19.1052	0.287659	0.049835	9.65118	2.41839	4.97094	0.086432	0.103335	0.286619	0.004486	0.005443	0.04885	0.055497	0.17166	1.73741	0.003392	0.009655	0.004896	0.00454	0.116847	0.653954	3.20497	0.025218	0.052816	0.688335	0.015946	0.004322
E1033	E1033-04_A	Preop	Cancer	NED	GA	2.86222	1.03164	0.204429	2.67398	0.568438	0.004496	0.00223	0.632061	2.00023	0.038339	4.38781	0.004064	2.48066	0.47953	0.955608	0.349982	0.088619	17.868	0.35847	0.015573	10.0405	4.25949	4.53448	0.055459	0.401161	0.364944	0.004316	0.007625	0.762293	0.037764	0.246473	1.18766	0.003309	0.003561	0.006618	0.003669	0.063012	0.800452	5.20111	0.056862	0.062041	0.472697	0.018199	0.006546
E1034	E1034-04_A	Preop	Cancer	NED	Epidural	3.58199	0.975902	0.150015	2.77388	0.246627	0.002265	0.006384	0.729413	2.42406	0.041047	6.28494	0.003878	4.19211	0.537253	1.43765	0.425951	0.200432	15.8417	0.771112	0.032399	10.196	2.88433	5.40273	0.063253	0.246181	0.445308	0.002128	0.008477	0.003775	0.036586	0.107114	1.59278	0.024505	0.003226	0.00429	0.017572	0.08031	0.77499	1.68047	0.09016	0.135223	0.600986	0.043862	0.020661
E1035	E1035-04_A	Preop	Cancer	NED	GA	3.07724	1.22127	0.291437	2.84448	0.494689	0.018817	0.011746	1.08031	1.59691	0.045875	6.02545	0.005143	2.86698	0.897921	1.75447	0.689935	0.331527	16.0629	0.324339	0.107879	11.9234	2.00798	5.84628	0.099347	0.05803	0.6201	0.001812	0.000993	0.005318	0.043596	0.121145	1.20379	0.003974	0.001753	0.003623	0.009876	0.062589	1.05892	1.50061	0.023902	0.078133	0.650197	0.020162	0.001344
E1041	E1041-04_A	Preop	Cancer	NED	GA	6.18513	0.499696	0.151439	3.03357	3.08267	0.004963	0.004845	3.55288	3.75129	0.066236	5.26563	0.006618	2.5048	0.330354	0.86627	0.228784	0.099443	13.6097	0.216966	0.010813	10.9993	1.93355	4.38594	0.056546	0.234338	0.343175	0.000414	0	0.000414	0.014476	0.024994	0.933687	0.00455	0.024816	0.010163	0.079885	0.088866	0.898176	1.42942	0.027948	0.061627	0.270617	0.000473	0.004077
E1044	E1044-02_A	Preop	Cancer	NED	GA	2.66737	0.963702	0.178099	2.42663	0.623489	0.001073	0.003559	0.860164	2.07178	0.049594	4.94623	0.006835	4.16712	1.2729	0.858639	0.559208	0.253734	15.9078	0.461488	0.066201	13.7983	2.4395	5.6606	0.06253	0.109469	0.475101	0.005253	0.001017	0.014404	0.045245	0.091337	1.5224	0.033157	0.010167	0.005987	0.076708	0.103256	0.490522	1.5102	0.096195	0.147371	0.374782	0.012257	0.004519
E1045	E1045-02_A	Preop	Cancer	< 0.5 cm	Epidural	3.23796	0.812024	0.221855	3.14433	0.450921	0.030671	0.039188	0.87462	2.74618	0.040546	10.0811	0.011861	2.80794	1.07317	0.829371	0.684428	0.164275	12.458	0.447577	0.097813	10.8423	2.12602	4.83682	0.131828	0.150533	0.698849	0.001359	0.021423	0.01045	0.037359	0.09102	1.16895	0.002038	0.009562	0.004232	0.004076	0.136426	1.36698	1.24607	0.041278	0.066881	0.463252	0.011443	0.034903
E1049	E1049-02_A	Preop	Cancer	NED	Epidural	3.81521	0.544792	0.146442	2.428	1.77889	0.012199	0.016318	0.910299	1.73208	0.059588	4.52663	0.001616	3.93637	0.602504	1.08468	0.46336	0.175637	15.9286	0.477593	0.044053	11.7102	3.59563	5.90904	0.050204	0.244766	0.306596	0.000626	0.004848	0.015067	0.019498	0.077209	0.857905	0.004848	0.354402	0.060631	0.550527	0.075228	0.634774	1.89484	0.035451	0.078096	0.302998	0.007403	0.002033
E1051	E1051-02_A	Preop	Cancer	NED	Epidural	3.25212	1.0251	0.135954	2.74606	0.684002	0.037204	0.062755	2.95168	2.1224	0.056324	6.02269	0.008071	3.30374	1.16045	1.93802	0.804375	0.254213	15.1766	0.464748	0.026371	11.4192	1.99383	5.63184	0.073113	0.092924	0.396857	0.001813	0.01325	0.026802	0.082824	0.113425	0.810375	0.009323	0.009797	0.004834	0.029867	0.168799	0.764193	0.949135	0.042642	0.222361	0.519562	0.0041	0.007726
E1052	E1052-02_A	Preop	Cancer	NED	GA	3.04225	0.656367	0.124423	2.42152	0.102526	0.002812	0.047114	0.975331	1.97196	0.079845	6.40135	0.006362	3.10882	0.947025	1.30789	0.808311	0.191268	16.9825	0.352524	0.081643	14.0172	2.1765	5.91804	0.064954	0.071408	0.364372	0.001936	0.002904	0.002766	0.046192	0.08132	0.885851	0.004103	0.038263	0.02517	0.154249	0.04905	0.673747	1.08532	0.017933	0.007468	0.430755	0.007883	0.005209
E1056	E1056-02_A	Preop	Cancer	NED	Epidural	4.55337	0.437128	0.138332	3.63326	0.164846	0.005384	0.008671	0.389201	1.52118	0.09748	3.40352	0.006981	4.67999	0.724122	0.934484	1.0504	0.086806	16.6664	0.188262	0.094945	12.6653	3.94276	6.57829	0.088903	0.128596	0.271499	0.00263	0.004664	0.001471	0.066865	0.128033	0.679326	0.003788	0.003537	0.003068	0.014087	0.023071	0.341087	2.23178	0.006229	0.013586	0.27801	0.002003	0.003443
E1057	E1057-02_A	Preop	Cancer	NED	Epidural	4.53264	0.934912	0.107962	3.79382	0.265228	0.001401	0.054002	0.79092	2.05799	0.103544	3.68022	0.007909	4.49213	0.750753	1.46257	1.06287	0.181617	14.0919	0.406009	0.106863	11.9925	3.93855	6.51728	0.080055	0.070229	0.150543	0.001379	0.00069	0.02017	0.094342	0.159572	1.01755	0.004741	0.015084	0.004633	0.015903	0.085076	0.417214	2.09831	0.021204	0.060101	0.372909	0.00181	0.003556
E1061	E1061-02_A	Preop	Cancer	NED	Epidural	3.45651	0.574704	0.127309	3.56045	0.422406	0.009618	0.013944	1.16671	1.62322	0.116217	3.01598	0.007588	3.70086	1.02079	1.21939	1.05873	0.177503	15.1597	0.45433	0.102321	12.7139	4.62182	5.40844	0.079266	0.184801	0.610229	0.007733	0.026631	0.126488	0.085114	0.14077	1.37155	0.011793	0.009957	0.010633	0.016192	0.153989	0.297756	2.73048	0.035501	0.052417	0.380405	0.001933	0.005075
E1001	E1001-35_A	POD3	Cancer	NED	Epidural	2.81072	1.2238	0.231757	1.17969	0.174476	0.027159	0.022221	1.25574	2.1403	0.063865	6.90465	0.014979	2.0124	0.267969	0.660047	0.218754	0.1195	18.0858	0.879624	0.016789	12.6219	2.1375	4.44536	0.052178	0.136783	0.309613	0.018106	0.013991	0.013497	0.04938	0.082465	1.94969	0.019752	0.004938	0.015472	0.133162	0.109295	0.79683	3.2102	0.042796	0.056458	0.499562	0.004609	0.019917
E1003	E1003-24_A	POD3	Cancer	NED	Epidural	4.08347	0.697468	0.180852	3.3539	0.216139	0.038163	0.005496	0.313319	3.38708	0.04443	7.47091	0.007705	3.21855	0.655093	1.05527	0.547281	0.298321	16.4393	0.574041	0.041245	8.23073	3.42904	2.84899	0.075864	0.039961	0.47758	0.005599	0.003544	0.004674	0.021265	0.049566	2.10011	0.00565	0.003133	0.005136	0.007345	0.081514	0.946531	4.19822	0.006626	0.007756	0.619498	0.004931	0.00791
E1007	E1007-29_A	POD3	Cancer	NED	Epidural	4.57286	0.750626	0.119006	2.67837	1.06176	0.005652	0.009968	1.67119	2.44601	0.049535	3.77592	0.006382	2.78753	0.637577	1.12801	0.387651	0.132803	20.2025	0.249378	0.013432	12.8296	2.11269	3.69217	0.056343	0.102049	0.550236	0.010454	0.00705	0.012217	0.03355	0.046496	1.07543	0.010272	0.019449	0.01167	0.008266	0.105148	0.711484	1.08455	0.050143	0.113293	0.311252	0.010515	0.009238
E1008	E1008-26_A	POD3	Cancer	NED	Epidural	3.69608	0.531215	0.165994	2.72867	0.268147	0.00518	0.006181	0.504713	1.90018	0.049726	4.22524	0.003203	3.70879	0.387469	0.615801	0.411568	0.196274	18.2271	0.533367	0.015766	11.1677	4.85513	5.17228	0.047148	0.079631	0.288393	0.001777	0.01509	0.00468	0.031182	0.108235	1.41294	0.01439	0.003178	0.006156	0.034385	0.06439	0.597707	2.56591	0.096949	0.213842	0.344425	0.005631	0.006957
E1009	E1009-30_A	POD3	Cancer	< 1 cm	Epidural	2.29938	1.94372	0.199949	1.9499	0.154568	0.011865	0.00585	0.679071	1.43168	0.014981	9.39321	0.006014	2.20758	0.411981	0.788914	0.184202	0.361624	19.2772	0.619639	0.024659	10.3756	1.46968	4.86022	0.043084	0.074851	0.679727	0.008092	0.011099	0.003991	0.016129	0.095136	1.6553	0.029962	0.018043	0.008147	0.048115	0.08349	0.857259	1.28799	0.046638	0.139532	1.04988	0.008967	0.05823
E1011	E1011-25_A	POD3	Cancer	< 0.5 cm	Epidural	4.66993	0.705975	0.136301	2.81276	0.368637	0.00299	0.019155	1.52216	1.72393	0.024691	7.08053	0.00716	2.59411	0.351105	0.959902	0.300763	0.097622	19.5935	0.387201	0.006311	9.20473	2.06589	4.73038	0.069977	0.066434	0.271089	0.001587	0.004355	0.084372	0.039159	0.101718	1.38468	0.005425	0.007751	0.0031	0.005462	0.076141	1.10152	1.92988	0.033734	0.112791	0.548157	0.003986	0.003691
E1015	E1015-27_A	POD3	Cancer	< 0.5 cm	Epidural	8.77066	0.441907	0.194976	5.41951	0.016618	0.017313	0.006703	0.313948	2.98768	0.07991	6.42169	0.013787	2.6292	0.098911	0.13981	0.143501	0.022775	13.9575	0.291272	0.024976	8.16137	1.91689	7.16601	0.162486	0.036612	0.134646	0.004833	0.004866	0.058162	0.085174	0.173227	0.701549	0.006256	0.006985	0.00907	0.009666	0.033335	1.24091	2.62483	0.011884	0.0407	0.527726	0.009352	0.010113
E1016	E1016-32_A	POD3	Cancer	NED	GA	3.78121	0.703376	0.118619	1.81717	0.257693	0.004003	0.003455	0.428903	1.62178	0.015191	6.48887	0.005758	3.7211	0.154813	0.473981	0.164355	0.173184	21.6883	0.245079	0.013326	11.6014	2.00127	5.48179	0.056759	0.041678	0.288238	5.48e-05	0.002303	0.002084	0.011132	0.132987	1.22403	0.012449	0.002139	0.007074	0.070305	0.17642	0.74818	1.3937	0.020729	0.086153	0.568305	0.001261	0.004771
E1017	E1017-20_A	POD3	Cancer	< 0.5 cm	GA	3.36127	1.28965	0.176897	3.05117	0.148495	0.037372	0.004667	1.44606	2.22922	0.043132	6.24045	0.004833	2.19913	0.434099	0.974985	0.396065	0.187324	17.3413	0.528936	0.040186	8.93866	2.29738	4.712	0.058326	0.107019	0.659755	0.002979	0.005892	0.003078	0.029428	0.204272	1.67357	0.014995	0.016054	0.003145	0.005263	0.222875	0.999282	2.78728	0.101424	0.345518	0.856679	0.004634	0.040417
E1019	E1019-18_A	POD3	Cancer	NED	Epidural	7.72243	0.414419	0.150411	3.49586	0.074301	0.007655	0.007944	1.64227	3.92665	0.059626	6.037	0.004866	3.53535	0.275587	1.09342	0.258968	0.174107	13.9711	0.193534	0.033544	8.8111	1.9308	6.31763	0.102287	0.052471	0.205113	0.001635	0.003712	0.029255	0.02637	0.051182	1.10537	0.003116	0.003116	0.003847	0.023235	0.081687	1.31115	1.74977	0.015272	0.059626	0.380951	0.002097	0.003654
E1020	E1020-21_A	POD3	Cancer	NED	Epidural	3.77399	0.732616	0.125025	3.34457	1.94618	0.016562	0.011441	0.527917	1.62758	0.032479	4.25342	0.004337	3.10988	0.859486	1.41218	0.942666	0.133098	19.5175	0.341672	0.033724	9.49702	2.48762	5.5599	0.081981	0.23584	0.427667	0.007382	0.003506	0.014809	0.018823	0.057437	1.02354	0.006367	0.002906	0.00609	0.013379	0.111646	0.726895	2.13022	0.003829	0.01587	0.422361	0.006505	0.006966
E1021	E1021-11_A	POD3	Cancer	NED	Epidural	2.66635	0.978004	0.130763	1.48895	10.3346	0.025697	0.004824	0.824921	2.027	0.024074	4.23809	0.004341	2.03937	0.565237	1.53351	0.604396	0.27091	13.9401	0.939503	0.045824	10.0475	2.67468	4.16258	0.034072	0.29744	0.431229	0.001754	0.008376	0.006227	0.020522	0.064417	1.53109	0.005613	0.004692	0.003289	0.005613	0.090859	0.471703	2.52848	0.028766	0.007192	0.513624	0.00456	0.00478
E1022	E1022-25_A	POD3	Cancer	NED	Epidural	11.0122	0.532228	0.17467	7.22202	0.021133	0.020321	0.010953	0.036245	0.138741	0.050803	1.55325	0.020064	0.672475	0.030838	0.024381	0.033571	0.013528	17.6216	0.027253	0.018974	8.24235	2.12204	3.7844	0.184414	0.074728	0.076214	0.009032	0.009626	0.025906	0.242802	0.568315	0.226779	0.010774	0.012022	0.023252	0.021252	0.056566	0.52084	7.45284	0.013884	0.048228	2.05755	0.011864	0.022519
E1024	E1024-25_A	POD3	Cancer	< 0.5 cm	Epidural	4.27744	0.934112	0.117264	2.33202	1.28587	0.005365	0.007453	1.0167	2.45757	0.038884	4.19924	0.00504	3.47938	0.340162	1.64972	0.588982	0.226678	17.8558	0.546426	0.025959	10.0093	3.79341	6.0927	0.047993	0.188983	0.215985	0.002412	0.006985	0.002736	0.042124	0.063006	0.895157	0.005365	0.014401	0.012817	0.042988	0.125436	0.550062	1.95924	0.009397	0.007345	0.409793	0.037012	0.004176
E1026	E1026-23_A	POD3	Cancer	NED	Epidural	5.76418	0.651946	0.098077	2.44492	0.115334	0.012702	0.003254	2.63977	2.47366	0.080455	4.27342	0.008069	3.50609	0.305345	1.19652	0.417425	0.083969	17.19	0.350141	0.025821	11.4569	2.46075	6.69692	0.06489	0.0645	0.245713	0.002499	0.003436	0.005596	0.059112	0.101304	0.949456	0.004893	0.006117	0.004659	0.003852	0.057992	0.636172	1.34137	0.015982	0.047242	0.301805	0.002004	0.004815
E1033	E1033-14_A	POD3	Cancer	NED	GA	3.13403	1.56433	0.220659	3.03697	0.821342	0.003298	0.007599	1.81316	1.5026	0.029034	4.58982	0.002294	1.62562	0.600468	1.82563	0.729078	0.08997	16.4336	0.501035	0.003584	12.0474	2.60948	4.68316	0.065022	0.106673	0.504835	0.003513	0.015557	0.004086	0.022009	0.166821	1.71179	0.018281	0.002366	0.013119	0.004373	0.119291	0.436157	2.967	0.075919	0.201805	0.644987	0.002079	0.006237
E1034	E1034-16_A	POD3	Cancer	NED	Epidural	6.97326	0.449638	0.357506	4.28327	0.177721	0.029207	0.008091	0.399252	3.00179	0.049483	5.38054	0.006641	4.48842	0.484776	0.711465	0.451379	0.148257	14.4871	0.346062	0.040941	9.37387	3.37345	3.98008	0.162828	0.052159	0.318435	0.004094	0.014507	0.01686	0.022759	0.096839	1.01352	0.026144	0.001773	0.003933	0.020954	0.016022	1.16339	1.83679	0.049258	0.059477	0.30741	0.004771	0.00461
E1035	E1035-13_A	POD3	Cancer	NED	GA	3.93128	0.691137	0.110028	2.55378	0.270757	0.02013	0.048488	1.29751	2.13389	0.10556	2.98651	0.010485	3.41883	0.282569	0.924997	0.612344	0.16648	20.0457	0.22072	0.019864	12.6896	3.74321	5.6789	0.0822	0.10056	0.202714	0	0.00146	0.003849	0.078174	0.196697	0.884472	0.001371	0.006636	0.000885	0.004999	0.035614	0.59624	1.71462	0.010087	0.009379	0.255936	0.017166	0.038711
E1041	E1041-22_A	POD3	Cancer	NED	GA	5.36122	0.914011	0.194076	2.99387	0.49693	0.006539	0.054736	0.66614	4.11706	0.049782	7.19217	0.009857	3.48867	0.537152	1.1704	0.858037	0.312414	9.6948	0.459928	0.001437	9.88853	3.71687	5.72812	0.091936	0.048197	0.177433	0.003715	0.002873	0.148851	0.024866	0.072915	0.741284	0.001635	0.002526	0.002427	0.00218	0.089212	1.57495	3.22064	0.02977	0.066822	0.532892	0.037745	0.004557
E1044	E1044-26_A	POD3	Cancer	NED	GA	3.0902	0.76145	0.113563	3.20667	0.982114	0.007008	0.017951	0.469416	2.45584	0.06939	3.29757	0.003102	3.72626	1.16667	1.17819	1.01129	0.282155	15.0462	0.517006	0.090586	12.4576	5.08795	5.81663	0.066173	0.140704	0.293643	0.000718	0.002671	0.00764	0.058763	0.09498	0.837044	0.017979	0.004394	0.009622	0.021627	0.093372	0.500348	2.24946	0.046097	0.038314	0.369782	0.010311	0.004078
E1045	E1045-24_A	POD3	Cancer	< 0.5 cm	Epidural	2.86602	0.912659	0.16375	2.90038	0.163638	0.034138	0.035817	0.963474	2.41126	0.1173	7.40379	0.067604	3.42644	0.732343	1.06689	0.478155	0.301309	15.7647	0.290788	0.033019	12.2082	2.47472	5.79685	0.069059	0.25083	0.409767	0.001455	0.00235	0.003694	0.018692	0.149871	1.06634	0.001119	0.005708	0.002462	0.009402	0.00347	1.08503	1.18666	0.006716	0.021602	0.351453	0.008395	0.003582
E1049	E1049-18_A	POD3	Cancer	NED	Epidural	2.98533	0.848178	0.182971	2.23723	1.10637	0.015325	0.032847	0.71095	2.25723	0.03836	6.28478	0.00556	4.42279	0.722351	1.63024	0.790661	0.253664	14.3513	1.03138	0.089056	11.8673	3.34337	5.94155	0.050789	0.089196	0.344822	0.002944	0.015559	0.002009	0.030371	0.106717	0.684692	0.003972	0.041538	0.009158	0.037099	0.034949	0.800006	1.41751	0.019344	0.058872	0.217733	0.033735	0.000934
E1051	E1051-22_A	POD3	Cancer	NED	Epidural	2.65145	1.84234	0.191575	2.5751	4.51182	0.024998	0.049338	0.385033	2.59231	0.04229	8.01254	0.00823	3.03127	1.11395	1.56522	0.613907	0.504111	9.63852	1.01085	0.097013	9.44243	1.57651	8.00636	0.064179	0.172663	0.532829	0.006523	0.0095	0.003021	0.02618	0.083705	1.09718	0.029988	0.01147	0.005472	0.032746	0.199893	0.899169	0.910551	0.030251	0.138122	0.765338	0.011339	0.005866
E1052	E1052-17_A	POD3	Cancer	NED	GA	2.73816	0.770781	0.187102	2.47102	0.085651	0.003175	0.008491	1.27656	2.01951	0.072877	6.18788	0.003101	3.50458	0.565219	1.38163	0.611072	0.174697	16.4095	0.157789	0.021486	14.1754	2.97864	5.35677	0.04792	0.042235	0.469823	0.003323	0.001181	0.000517	0.029092	0.048585	1.12379	0.003766	0.016613	0.006645	0.019271	0.07236	0.597708	1.90425	0.007753	0.012774	0.394066	0.001698	0.003618
E1056	E1056-19_A	POD3	Cancer	NED	Epidural	4.72036	0.510622	0.15975	3.49702	0.765999	0.0037	0.006227	0.400561	1.87435	0.063316	3.44199	0.005837	4.95473	0.605545	0.65724	0.627666	0.10313	16.4836	0.21994	0.04724	12.2799	3.48678	7.79644	0.075328	0.05834	0.215484	0.001407	0.000339	0.001277	0.079836	0.153393	0.781059	0.001615	0.00542	0.004534	0.002293	0.084005	0.523129	1.42775	0.007973	0.020194	0.24584	0.007843	0.003075
E1057	E1057-15_A	POD3	Cancer	NED	Epidural	2.5572	0.615728	0.157418	2.82674	3.7721	0.015442	0.004679	0.379086	2.11443	0.054563	7.03473	0.006832	3.08023	0.659528	0.863273	0.415867	0.191391	15.1578	0.429952	0.04263	12.0897	2.83596	4.75296	0.066496	0.189707	0.524525	0.008517	0.003182	0.006645	0.049275	0.336503	0.750732	0.01474	0.010529	0.002901	0.033271	0.159664	0.714419	1.30656	0.054142	0.113431	0.611376	0.025737	0.007862
E1061	E1061-15_A	POD3	Cancer	NED	Epidural	3.32996	1.20324	0.444922	2.64645	0.307224	0.008579	0.063916	0.603381	2.84987	0.070779	10.0089	0.003174	4.57919	0.804908	0.861703	0.337852	0.442348	9.68301	0.773422	0.068034	12.4115	2.24168	5.90598	0.052763	0.101064	0.844716	0.003518	0.036719	0.005405	0.022735	0.034317	0.991679	0.007636	0.001887	0.003432	0.017759	0.074554	1.05671	1.18394	0.079959	0.161719	0.550018	0.022392	0.004547
[truncated: 24 more columns]
